# Supplementary material for: PEBP1 amplifies mitochondrial dysfunction-induced integrated stress response
Source: eLife. 2025 Jan 29;13:RP102852. doi: 10.7554/eLife.102852 (PMC11778924; doi:10.7554/eLife.102852)
Supplement: Supplementary file 1. [file elife-102852-supp1.xlsx]

## Sheet: Guide
The Analysis of Independent Differences (AID) results for the different drug treatments are shown in individual tabs. See https://github.com/alex-bio/TPP for further details.
Primarily, use the adjusted p value of the log10 Multiavariate normal pvalue for selecting the overall statistically significant hits (p<0.05 equals -1.30 or smaller; p<0.01 equals -2 or smaller)
Column:	Column explanation
Protein.accession	Uniprot accession for the identified protein
Protein.description	Brief description of the protein
Gene.name	Corresponding gene name
x_37	Difference values, or yi,js, for each protein i for drug x at 37C temperature
x_45	Difference values, or yi,js, for each protein i for drug x for the 45-50C temperature pool
x_51	Difference values, or yi,js, for each protein i for drug x for the 51-56C temperature pool
log10_Multiv_Norm_pval	Log10 of the Multivariate Normal p-value
Adjusted.BH_log10_Multiv_Norm_pval	Log10 of the Benjamini-Hochberg adjusted Multivariate Normal p-value
pval_temp_1	Individual Normal p-values for 45-50C temperature pool
pval_temp_2	Individual Normal p-values for 51-56C temperature pool
pval_count	Number of individual Normal p-values per protein that pass the user-defined p-value
var_warning	Warning issued if variance of the differences per protein is greater than 2 standard deviations away from the mean variance; this is qualitative and intended to highlight curves that oscillate between extreme values. With two temperature pools only, the warning will be frequent for proteins which show strong thermal stabilization only in one of the pools (eg., high or low Tm proteins)
sum_of_signs	Sum of the signs of the difference values, which indicates approximate directionality
prediction	Predicted stabilization or destabilization based on “sum_of_signs”. Note that this prediction does not consider whether the change is signficant or not, it only shows the direction of change

## Sheet: palbociclib
Protein.accession	Protein.description	Gene.name	palb_37	palb_45	palb_51	log10_Multiv_Norm_pval	Adjusted.BH_log10_Multiv_Norm_pval	pval_temp_1	pval_temp_2	pval_count	var_warning	sum_of_signs	prediction
P62826	GTP-binding nuclear protein Ran OS=Homo sapiens OX=9606 GN=RAN PE=1 SV=3	RAN	0.195626	0.212201	0.343588	-12.9163	-9.3509	8.02539e-05	1.12457e-09	2		2	stabilized
Q2M389	WASH complex subunit 4 OS=Homo sapiens OX=9606 GN=WASHC4 PE=1 SV=2	WASHC4	0.0178067	0.309166	0.155444	-10.2862	-7.19793	8.24438e-09	0.00509403	2		2	stabilized
P11802	Cyclin-dependent kinase 4 OS=Homo sapiens OX=9606 GN=CDK4 PE=1 SV=2	CDK4	0.0615076	0.217399	0.163095	-6.68322	-4.32196	5.31807e-05	0.00333772	2		2	stabilized
Q14141	Septin-6 OS=Homo sapiens OX=9606 GN=SEPTIN6 PE=1 SV=4	SEPTIN6	-0.0217111	0.137088	0.160148	-4.3083	-2.41502	0.0112768	0.00393557	2		2	stabilized
Q9NRY4	Rho GTPase-activating protein 35 OS=Homo sapiens OX=9606 GN=ARHGAP35 PE=1 SV=3	ARHGAP35	0.00513838	0.121523	0.165347	-4.09314	-2.26601	0.024968	0.00293773	2		2	stabilized
Q9H9H4	Vacuolar protein sorting-associated protein 37B OS=Homo sapiens OX=9606 GN=VPS37B PE=1 SV=1	VPS37B	-0.0409734	0.14075	0.127585	-3.68051	-2.00113	0.00924892	0.020672	2		2	stabilized
Q12834	Cell division cycle protein 20 homolog OS=Homo sapiens OX=9606 GN=CDC20 PE=1 SV=2	CDC20	0.114312	0.101503	0.315543	-8.81265	-5.94624	0.0620168	2.13996e-08	1	Warning: high variance	2	stabilized
O43657	Tetraspanin-6 OS=Homo sapiens OX=9606 GN=TSPAN6 PE=1 SV=1	TSPAN6	0.1072	0.0408539	0.262677	-5.83281	-3.54619	0.466629	2.92594e-06	1	Warning: high variance	2	stabilized
P18669	Phosphoglycerate mutase 1 OS=Homo sapiens OX=9606 GN=PGAM1 PE=1 SV=2	PGAM1	0.211797	0.0709121	0.176888	-3.50287	-1.89819	0.19633	0.00149338	1		2	stabilized
P36406	E3 ubiquitin-protein ligase TRIM23 OS=Homo sapiens OX=9606 GN=TRIM23 PE=1 SV=1	TRIM23	0.0414394	0.160395	0.0684698	-3.19794	-1.69032	0.00296454	0.200434	1		2	stabilized
Q96BR5	Cytochrome c oxidase assembly factor 7 OS=Homo sapiens OX=9606 GN=COA7 PE=1 SV=2	COA7	0.157519	0.000799662	0.187038	-3.11994	-1.64447	0.981075	0.000798136	1		2	stabilized
P53999	Activated RNA polymerase II transcriptional coactivator p15 OS=Homo sapiens OX=9606 GN=SUB1 PE=1 SV=3	SUB1	0.0505362	0.000389256	0.181853	-2.98185	-1.54681	0.974932	0.00110324	1		2	stabilized
P61764	Syntaxin-binding protein 1 OS=Homo sapiens OX=9606 GN=STXBP1 PE=1 SV=1	STXBP1	0.00227144	0.0648837	0.157791	-2.94535	-1.5314	0.238422	0.00448231	1		2	stabilized
P09493	Tropomyosin alpha-1 chain OS=Homo sapiens OX=9606 GN=TPM1 PE=1 SV=2	TPM1	0.107511	0.0177704	0.177708	-2.94471	-1.5314	0.76817	0.00142127	1		2	stabilized
Q9P1F3	Costars family protein ABRACL OS=Homo sapiens OX=9606 GN=ABRACL PE=1 SV=1	ABRACL	-0.143728	0.127068	0.104611	-2.94449	-1.5314	0.0189788	0.0558474	1		2	stabilized
P09972	Fructose-bisphosphate aldolase C OS=Homo sapiens OX=9606 GN=ALDOC PE=1 SV=2	ALDOC	-0.0568088	0.148241	0.0719781	-2.93432	-1.52731	0.00608224	0.179708	1		2	stabilized
Q6GMV2	SET and MYND domain-containing protein 5 OS=Homo sapiens OX=9606 GN=SMYD5 PE=1 SV=2	SMYD5	0.105038	0.151928	0.0577639	-2.8456	-1.48705	0.00491581	0.274339	1		2	stabilized
P41214	Eukaryotic translation initiation factor 2D OS=Homo sapiens OX=9606 GN=EIF2D PE=1 SV=3	EIF2D	-0.0240736	0.0873155	0.138446	-2.8426	-1.48674	0.109617	0.0122862	1		2	stabilized
O00115	Deoxyribonuclease-2-alpha OS=Homo sapiens OX=9606 GN=DNASE2 PE=1 SV=2	DNASE2	-0.0393306	0.0750018	0.146875	-2.83603	-1.48325	0.171053	0.00802081	1		2	stabilized
Q9H857	5'-nucleotidase domain-containing protein 2 OS=Homo sapiens OX=9606 GN=NT5DC2 PE=1 SV=1	NT5DC2	0.116723	0.139584	0.0758976	-2.77979	-1.45246	0.009856	0.158485	1		2	stabilized
P53367	Arfaptin-1 OS=Homo sapiens OX=9606 GN=ARFIP1 PE=1 SV=2	ARFIP1	0.0479269	0.158076	0.02407	-2.66031	-1.40243	0.00341275	0.61426	1		2	stabilized
Q9UJ41	Rab5 GDP/GTP exchange factor OS=Homo sapiens OX=9606 GN=RABGEF1 PE=1 SV=3	RABGEF1	0.055174	0.0480521	0.153181	-2.62966	-1.39153	0.388102	0.00575431	1		2	stabilized
Q9H147	Deoxynucleotidyltransferase terminal-interacting protein 1 OS=Homo sapiens OX=9606 GN=DNTTIP1 PE=1 SV=2	DNTTIP1	0.0834358	0.162812	0.00263637	-2.62521	-1.39153	0.00255495	0.897165	1		2	stabilized
P13591	Neural cell adhesion molecule 1 OS=Homo sapiens OX=9606 GN=NCAM1 PE=1 SV=3	NCAM1	0.00178486	0.101837	0.112652	-2.58375	-1.37056	0.0611449	0.0400898	1		2	stabilized
O43768	Alpha-endosulfine OS=Homo sapiens OX=9606 GN=ENSA PE=1 SV=1	ENSA	-0.0136631	0.0778058	0.133052	-2.58052	-1.37011	0.155186	0.0159741	1		2	stabilized
P15374	Ubiquitin carboxyl-terminal hydrolase isozyme L3 OS=Homo sapiens OX=9606 GN=UCHL3 PE=1 SV=1	UCHL3	-0.0210829	0.142182	0.0539291	-2.56161	-1.36915	0.00854863	0.304856	1		2	stabilized
Q96SF7	T-box transcription factor TBX15 OS=Homo sapiens OX=9606 GN=TBX15 PE=1 SV=2	TBX15	0.0637255	0.142256	0.0525689	-2.54778	-1.36622	0.00851391	0.316201	1		2	stabilized
Q9BWD1	Acetyl-CoA acetyltransferase, cytosolic OS=Homo sapiens OX=9606 GN=ACAT2 PE=1 SV=2	ACAT2	0.0185717	0.127771	0.0742629	-2.48985	-1.32415	0.0183167	0.167093	1		2	stabilized
P09486	SPARC OS=Homo sapiens OX=9606 GN=SPARC PE=1 SV=1	SPARC	-0.0564403	0.152384	0.0177521	-2.46222	-1.30168	0.00478643	0.693924	1		2	stabilized
Q12905	Interleukin enhancer-binding factor 2 OS=Homo sapiens OX=9606 GN=ILF2 PE=1 SV=2	ILF2	0.154542	0.135999	0.0560732	-2.44189	-1.28981	0.011952	0.287526	1		2	stabilized
P48556	26S proteasome non-ATPase regulatory subunit 8 OS=Homo sapiens OX=9606 GN=PSMD8 PE=1 SV=2	PSMD8	0.0236986	0.133859	0.0586285	-2.42349	-1.2822	0.0133834	0.267757	1		2	stabilized
Q8IZ69	tRNA (uracil-5-)-methyltransferase homolog A OS=Homo sapiens OX=9606 GN=TRMT2A PE=1 SV=2	TRMT2A	0.109895	0.0848709	0.118927	-2.41026	-1.28116	0.120175	0.0305768	1		2	stabilized
A3KN83	Protein strawberry notch homolog 1 OS=Homo sapiens OX=9606 GN=SBNO1 PE=1 SV=1	SBNO1	0.012348	0.107084	0.0966856	-2.40563	-1.28116	0.048733	0.07612	1		2	stabilized
P30101	Protein disulfide-isomerase A3 OS=Homo sapiens OX=9606 GN=PDIA3 PE=1 SV=4	PDIA3	0.0963442	0.0628034	0.133799	-2.38461	-1.26999	0.254328	0.0154108	1		2	stabilized
Q9UJY4	ADP-ribosylation factor-binding protein GGA2 OS=Homo sapiens OX=9606 GN=GGA2 PE=1 SV=3	GGA2	-0.00415686	0.0318343	0.149792	-2.38357	-1.26999	0.576363	0.00688832	1		2	stabilized
Q7Z4Q2	HEAT repeat-containing protein 3 OS=Homo sapiens OX=9606 GN=HEATR3 PE=1 SV=2	HEATR3	0.00628232	0.0722246	0.125933	-2.35443	-1.25444	0.187936	0.0223112	1		2	stabilized
Q9UHQ9	NADH-cytochrome b5 reductase 1 OS=Homo sapiens OX=9606 GN=CYB5R1 PE=1 SV=1	CYB5R1	0.030997	0.109865	0.0887823	-2.33339	-1.24223	0.0430615	0.10195	1		2	stabilized
P23284	Peptidyl-prolyl cis-trans isomerase B OS=Homo sapiens OX=9606 GN=PPIB PE=1 SV=2	PPIB	-0.0330263	0.00745462	0.153608	-2.27323	-1.20616	0.919414	0.00562407	1		2	stabilized
P07741	Adenine phosphoribosyltransferase OS=Homo sapiens OX=9606 GN=APRT PE=1 SV=2	APRT	0.0146838	0.143619	0.0185384	-2.25199	-1.19447	0.00789406	0.6838	1		2	stabilized
P82933	28S ribosomal protein S9, mitochondrial OS=Homo sapiens OX=9606 GN=MRPS9 PE=1 SV=2	MRPS9	-0.0453282	0.112454	0.079042	-2.23908	-1.18825	0.0382936	0.142876	1		2	stabilized
P01116	GTPase KRas OS=Homo sapiens OX=9606 GN=KRAS PE=1 SV=1	KRAS	0.0799051	0.0827366	0.111	-2.22981	-1.18031	0.130029	0.0429765	1		2	stabilized
Q96B23	Uncharacterized protein C18orf25 OS=Homo sapiens OX=9606 GN=C18orf25 PE=1 SV=3	C18orf25	-0.0699315	0.00714074	0.151276	-2.21722	-1.17299	0.924091	0.00636906	1		2	stabilized
P35610	Sterol O-acyltransferase 1 OS=Homo sapiens OX=9606 GN=SOAT1 PE=1 SV=3	SOAT1	0.0912053	0.0773301	0.113985	-2.20113	-1.15875	0.157796	0.0378818	1		2	stabilized
Q5TBB1	Ribonuclease H2 subunit B OS=Homo sapiens OX=9606 GN=RNASEH2B PE=1 SV=1	RNASEH2B	-0.0448633	0.0538988	0.128609	-2.16619	-1.14613	0.330659	0.0197096	1		2	stabilized
Q14192	Four and a half LIM domains protein 2 OS=Homo sapiens OX=9606 GN=FHL2 PE=1 SV=3	FHL2	0.109176	0.0426248	0.133184	-2.1314	-1.12832	0.446531	0.0158734	1		2	stabilized
Q643R3	Lysophospholipid acyltransferase LPCAT4 OS=Homo sapiens OX=9606 GN=LPCAT4 PE=1 SV=1	LPCAT4	0.0144677	0.0342461	0.13604	-2.10546	-1.11873	0.545865	0.0138258	1		2	stabilized
O95571	Persulfide dioxygenase ETHE1, mitochondrial OS=Homo sapiens OX=9606 GN=ETHE1 PE=1 SV=2	ETHE1	-0.0557357	0.0396988	0.133005	-2.09687	-1.11669	0.480002	0.0160103	1		2	stabilized
P10321	HLA class I histocompatibility antigen, C alpha chain OS=Homo sapiens OX=9606 GN=HLA-C PE=1 SV=3	HLA-C	0.0495501	0.119358	0.0562337	-2.08069	-1.11669	0.0277171	0.286256	1		2	stabilized
P49354	Protein farnesyltransferase/geranylgeranyltransferase type-1 subunit alpha OS=Homo sapiens OX=9606 GN=FNTA PE=1 SV=1	FNTA	-0.0412678	0.139475	0.00171708	-2.03219	-1.08701	0.0099146	0.909896	1		2	stabilized
Q9H773	dCTP pyrophosphatase 1 OS=Homo sapiens OX=9606 GN=DCTPP1 PE=1 SV=1	DCTPP1	-0.0517308	0.0460588	0.126405	-2.0312	-1.08701	0.408999	0.0218312	1		2	stabilized
P61160	Actin-related protein 2 OS=Homo sapiens OX=9606 GN=ACTR2 PE=1 SV=1	ACTR2	-0.0797098	0.138639	0.00430658	-2.02958	-1.08696	0.0103742	0.874105	1		2	stabilized
Q13561	Dynactin subunit 2 OS=Homo sapiens OX=9606 GN=DCTN2 PE=1 SV=4	DCTN2	0.0261516	0.0574089	0.119202	-2.02497	-1.08696	0.298962	0.0302081	1		2	stabilized
P17980	26S proteasome regulatory subunit 6A OS=Homo sapiens OX=9606 GN=PSMC3 PE=1 SV=3	PSMC3	0.0659434	0.00235792	0.143664	-2.01451	-1.0826	0.995594	0.00945768	1		2	stabilized
Q14008	Cytoskeleton-associated protein 5 OS=Homo sapiens OX=9606 GN=CKAP5 PE=1 SV=3	CKAP5	0.0977617	0.121789	0.0455688	-2.01145	-1.08234	0.0246471	0.378913	1		2	stabilized
P06576	ATP synthase subunit beta, mitochondrial OS=Homo sapiens OX=9606 GN=ATP5F1B PE=1 SV=3	ATP5F1B	0.0280968	0.107805	0.0658297	-1.96937	-1.06236	0.0472067	0.217146	1		2	stabilized
O00264	Membrane-associated progesterone receptor component 1 OS=Homo sapiens OX=9606 GN=PGRMC1 PE=1 SV=3	PGRMC1	-0.00434076	0.0372014	0.127485	-1.9589	-1.06236	0.50962	0.0207679	1		2	stabilized
Q5JS54	Proteasome assembly chaperone 4 OS=Homo sapiens OX=9606 GN=PSMG4 PE=1 SV=2	PSMG4	-0.0353236	0.109013	0.0630339	-1.95701	-1.06236	0.0447371	0.235911	1		2	stabilized
Q96HC4	PDZ and LIM domain protein 5 OS=Homo sapiens OX=9606 GN=PDLIM5 PE=1 SV=5	PDLIM5	0.0496692	0.0292443	0.131163	-1.9568	-1.06236	0.609982	0.017479	1		2	stabilized
Q9NZB8	Molybdenum cofactor biosynthesis protein 1 OS=Homo sapiens OX=9606 GN=MOCS1 PE=1 SV=3	MOCS1	0.028559	0.126876	0.0274778	-1.94366	-1.05589	0.0191626	0.573036	1		2	stabilized
Q9NUL3	Double-stranded RNA-binding protein Staufen homolog 2 OS=Homo sapiens OX=9606 GN=STAU2 PE=1 SV=2	STAU2	0.00565173	0.0256273	0.131876	-1.93896	-1.05483	0.658332	0.016897	1		2	stabilized
Q8WU79	Stromal membrane-associated protein 2 OS=Homo sapiens OX=9606 GN=SMAP2 PE=1 SV=1	SMAP2	-0.027664	0.125583	0.0296372	-1.93501	-1.05313	0.0204448	0.547612	1		2	stabilized
Q9P0V9	Septin-10 OS=Homo sapiens OX=9606 GN=SEPTIN10 PE=1 SV=2	SEPTIN10	0.00528292	0.134372	0.0019521	-1.91553	-1.04878	0.013027	0.906639	1		2	stabilized
Q9Y6K5	2'-5'-oligoadenylate synthase 3 OS=Homo sapiens OX=9606 GN=OAS3 PE=1 SV=3	OAS3	0.140305	0.114268	0.0503238	-1.90926	-1.04801	0.0352274	0.335528	1		2	stabilized
O75884	Serine hydrolase RBBP9 OS=Homo sapiens OX=9606 GN=RBBP9 PE=1 SV=2	RBBP9	0.111586	0.133309	0.00437599	-1.90733	-1.04782	0.013775	0.873149	1		2	stabilized
P36915	Guanine nucleotide-binding protein-like 1 OS=Homo sapiens OX=9606 GN=GNL1 PE=1 SV=2	GNL1	0.0173868	0.109986	0.0568401	-1.90013	-1.04488	0.0428279	0.281492	1		2	stabilized
Q9Y6H1	Coiled-coil-helix-coiled-coil-helix domain-containing protein 2 OS=Homo sapiens OX=9606 GN=CHCHD2 PE=1 SV=1	CHCHD2	0.0983818	0.0324756	0.125866	-1.88022	-1.03588	0.568175	0.0223791	1		2	stabilized
O60232	Protein ZNRD2 OS=Homo sapiens OX=9606 GN=ZNRD2 PE=1 SV=1	ZNRD2	0.0218557	0.120883	0.0326203	-1.8627	-1.02824	0.0257555	0.513434	1		2	stabilized
Q8TAE8	Growth arrest and DNA damage-inducible proteins-interacting protein 1 OS=Homo sapiens OX=9606 GN=GADD45GIP1 PE=1 SV=1	GADD45GIP1	-0.0602035	0.0514824	0.113082	-1.83876	-1.01768	0.353698	0.0393651	1		2	stabilized
Q07020	60S ribosomal protein L18 OS=Homo sapiens OX=9606 GN=RPL18 PE=1 SV=2	RPL18	0.0777109	0.0281342	0.125454	-1.83166	-1.01361	0.624654	0.022806	1		2	stabilized
Q99575	Ribonucleases P/MRP protein subunit POP1 OS=Homo sapiens OX=9606 GN=POP1 PE=1 SV=2	POP1	0.00556357	0.0183147	0.129584	-1.8308	-1.01361	0.76038	0.0188307	1		2	stabilized
P51812	Ribosomal protein S6 kinase alpha-3 OS=Homo sapiens OX=9606 GN=RPS6KA3 PE=1 SV=1	RPS6KA3	-0.0865278	0.121174	0.0270082	-1.8178	-1.00791	0.0253947	0.578638	1		2	stabilized
P00338	L-lactate dehydrogenase A chain OS=Homo sapiens OX=9606 GN=LDHA PE=1 SV=2	LDHA	0.0945239	0.0112039	0.131398	-1.81367	-1.00791	0.863803	0.0172848	1		2	stabilized
P47813	Eukaryotic translation initiation factor 1A, X-chromosomal OS=Homo sapiens OX=9606 GN=EIF1AX PE=1 SV=2	EIF1AX	0.049709	0.00530392	0.132976	-1.80521	-1.00288	0.95151	0.0160319	1		2	stabilized
Q9NP84	Tumor necrosis factor receptor superfamily member 12A OS=Homo sapiens OX=9606 GN=TNFRSF12A PE=1 SV=1	TNFRSF12A	-0.0547807	0.113317	0.0406942	-1.78739	-0.994334	0.0368086	0.426805	1		2	stabilized
O95229	ZW10 interactor OS=Homo sapiens OX=9606 GN=ZWINT PE=1 SV=2	ZWINT	-0.019712	0.00412748	0.132314	-1.78374	-0.99288	0.969104	0.0165474	1		2	stabilized
Q8WVY7	Ubiquitin-like domain-containing CTD phosphatase 1 OS=Homo sapiens OX=9606 GN=UBLCP1 PE=1 SV=2	UBLCP1	-0.0491812	0.124961	0.012716	-1.78205	-0.991917	0.0210874	0.76	1		2	stabilized
P09936	Ubiquitin carboxyl-terminal hydrolase isozyme L1 OS=Homo sapiens OX=9606 GN=UCHL1 PE=1 SV=2	UCHL1	0.0488793	0.0473088	0.111033	-1.75332	-0.978768	0.395818	0.0429177	1		2	stabilized
Q969M3	Protein YIPF5 OS=Homo sapiens OX=9606 GN=YIPF5 PE=1 SV=1	YIPF5	-0.0104297	0.020684	0.124656	-1.75142	-0.978663	0.726754	0.0236531	1		2	stabilized
Q96KG9	N-terminal kinase-like protein OS=Homo sapiens OX=9606 GN=SCYL1 PE=1 SV=1	SCYL1	-0.0397717	0.115235	0.0300255	-1.72283	-0.960908	0.0336792	0.5431	1		2	stabilized
P10515	Dihydrolipoyllysine-residue acetyltransferase component of pyruvate dehydrogenase complex, mitochondrial OS=Homo sapiens OX=9606 GN=DLAT PE=1 SV=3	DLAT	0.00528589	0.0336595	0.116472	-1.71037	-0.956314	0.553209	0.0340381	1		2	stabilized
O60678	Protein arginine N-methyltransferase 3 OS=Homo sapiens OX=9606 GN=PRMT3 PE=1 SV=4	PRMT3	0.0623844	0.116045	0.0248676	-1.69347	-0.949396	0.0324295	0.604495	1		2	stabilized
Q9Y5S9	RNA-binding protein 8A OS=Homo sapiens OX=9606 GN=RBM8A PE=1 SV=1	RBM8A	-0.0553161	0.114389	0.0271701	-1.68021	-0.943363	0.0350298	0.576703	1		2	stabilized
P53992	Protein transport protein Sec24C OS=Homo sapiens OX=9606 GN=SEC24C PE=1 SV=3	SEC24C	0.00298691	0.110165	0.0351151	-1.67017	-0.93933	0.0424851	0.485727	1		2	stabilized
P04439	HLA class I histocompatibility antigen, A alpha chain OS=Homo sapiens OX=9606 GN=HLA-A PE=1 SV=2	HLA-A	-0.00549011	0.0452348	0.107542	-1.66779	-0.939004	0.41783	0.0495902	1		2	stabilized
O14745	Na(+)/H(+) exchange regulatory cofactor NHE-RF1 OS=Homo sapiens OX=9606 GN=SLC9A3R1 PE=1 SV=4	SLC9A3R1	-0.0071515	0.0140455	0.121326	-1.63395	-0.925305	0.822086	0.0274897	1		2	stabilized
P05783	Keratin, type I cytoskeletal 18 OS=Homo sapiens OX=9606 GN=KRT18 PE=1 SV=2	KRT18	-0.0257484	0.113739	0.0223115	-1.62543	-0.918783	0.0360996	0.636031	1		2	stabilized
Q9P0L0	Vesicle-associated membrane protein-associated protein A OS=Homo sapiens OX=9606 GN=VAPA PE=1 SV=3	VAPA	0.153993	0.000147567	0.12319	-1.61987	-0.915435	0.971315	0.0252818	1		2	stabilized
Q8N1I0	Dedicator of cytokinesis protein 4 OS=Homo sapiens OX=9606 GN=DOCK4 PE=1 SV=3	DOCK4	-0.0311818	0.108735	0.0315631	-1.60895	-0.911974	0.0452949	0.525418	1		2	stabilized
Q02952	A-kinase anchor protein 12 OS=Homo sapiens OX=9606 GN=AKAP12 PE=1 SV=4	AKAP12	-0.0232056	0.0101915	0.121159	-1.60236	-0.908556	0.878765	0.0276965	1		2	stabilized
P17655	Calpain-2 catalytic subunit OS=Homo sapiens OX=9606 GN=CAPN2 PE=1 SV=6	CAPN2	-0.0033204	0.111876	0.0221669	-1.58731	-0.900378	0.0393183	0.637836	1		2	stabilized
Q9BRP4	Proteasomal ATPase-associated factor 1 OS=Homo sapiens OX=9606 GN=PAAF1 PE=1 SV=2	PAAF1	-0.0467999	0.00726198	0.121339	-1.5853	-0.899988	0.922284	0.0274743	1		2	stabilized
P55010	Eukaryotic translation initiation factor 5 OS=Homo sapiens OX=9606 GN=EIF5 PE=1 SV=2	EIF5	0.0180684	0.0120233	0.119452	-1.58286	-0.898293	0.851729	0.0298772	1		2	stabilized
Q9BT78	COP9 signalosome complex subunit 4 OS=Homo sapiens OX=9606 GN=COPS4 PE=1 SV=1	COPS4	0.0583326	0.108007	0.0278629	-1.56131	-0.887474	0.0467862	0.568462	1		2	stabilized
O75368	SH3 domain-binding glutamic acid-rich-like protein OS=Homo sapiens OX=9606 GN=SH3BGRL PE=1 SV=1	SH3BGRL	-0.0887771	0.0297602	0.11032	-1.56039	-0.887131	0.603216	0.0442152	1		2	stabilized
O75616	GTPase Era, mitochondrial OS=Homo sapiens OX=9606 GN=ERAL1 PE=1 SV=2	ERAL1	-0.000758118	0.107867	0.0261598	-1.54361	-0.880784	0.047076	0.588824	1		2	stabilized
P60174	Triosephosphate isomerase OS=Homo sapiens OX=9606 GN=TPI1 PE=1 SV=3	TPI1	-0.0260134	0.00790514	0.118301	-1.53154	-0.873579	0.912705	0.0314292	1		2	stabilized
Q9NX24	H/ACA ribonucleoprotein complex subunit 2 OS=Homo sapiens OX=9606 GN=NHP2 PE=1 SV=1	NHP2	0.0495672	0.0273621	0.109858	-1.53021	-0.872787	0.634947	0.0450722	1		2	stabilized
Q99536	Synaptic vesicle membrane protein VAT-1 homolog OS=Homo sapiens OX=9606 GN=VAT1 PE=1 SV=2	VAT1	-0.0636282	0.116652	0.000969118	-1.52681	-0.871529	0.031518	0.920271	1		2	stabilized
O43172	U4/U6 small nuclear ribonucleoprotein Prp4 OS=Homo sapiens OX=9606 GN=PRPF4 PE=1 SV=2	PRPF4	-0.0320661	0.113379	0.00517347	-1.48865	-0.855828	0.0367031	0.862177	1		2	stabilized
Q15057	Arf-GAP with coiled-coil, ANK repeat and PH domain-containing protein 2 OS=Homo sapiens OX=9606 GN=ACAP2 PE=1 SV=3	ACAP2	0.0743266	0.110317	0.0131691	-1.48544	-0.854559	0.0421962	0.753974	1		2	stabilized
Q658Y4	Protein FAM91A1 OS=Homo sapiens OX=9606 GN=FAM91A1 PE=1 SV=3	FAM91A1	0.0936446	0.10741	0.0188852	-1.47382	-0.847867	0.0480382	0.679351	1		2	stabilized
P00918	Carbonic anhydrase 2 OS=Homo sapiens OX=9606 GN=CA2 PE=1 SV=2	CA2	-0.0216571	0.0207957	0.109813	-1.47271	-0.847867	0.72518	0.0451578	1		2	stabilized
Q969G6	Riboflavin kinase OS=Homo sapiens OX=9606 GN=RFK PE=1 SV=2	RFK	0.0378821	0.0143527	0.112552	-1.47123	-0.847867	0.817603	0.0402599	1		2	stabilized
Q96GA3	Protein LTV1 homolog OS=Homo sapiens OX=9606 GN=LTV1 PE=1 SV=1	LTV1	-0.0450298	0.00270493	0.11608	-1.45497	-0.838925	0.990398	0.0346214	1		2	stabilized
Q9NYL4	Peptidyl-prolyl cis-trans isomerase FKBP11 OS=Homo sapiens OX=9606 GN=FKBP11 PE=1 SV=1	FKBP11	0.0336779	0.110543	0.00478193	-1.43008	-0.828807	0.0417677	0.867561	1		2	stabilized
Q9ULC3	Ras-related protein Rab-23 OS=Homo sapiens OX=9606 GN=RAB23 PE=1 SV=1	RAB23	0.0536681	0.0176892	0.1084	-1.42225	-0.825496	0.769335	0.047874	1		2	stabilized
Q8IYQ7	Threonine synthase-like 1 OS=Homo sapiens OX=9606 GN=THNSL1 PE=1 SV=2	THNSL1	-0.0698251	0.10972	0.00446984	-1.41195	-0.821544	0.0433445	0.871857	1		2	stabilized
P20962	Parathymosin OS=Homo sapiens OX=9606 GN=PTMS PE=1 SV=2	PTMS	-0.0685972	0.00338304	0.112539	-1.39381	-0.812065	0.980246	0.0402813	1		2	stabilized
Q9BZE4	Nucleolar GTP-binding protein 1 OS=Homo sapiens OX=9606 GN=GTPBP4 PE=1 SV=3	GTPBP4	0.116757	0.0102397	0.109324	-1.38243	-0.805376	0.878052	0.0460828	1		2	stabilized
Q8TD16	Protein bicaudal D homolog 2 OS=Homo sapiens OX=9606 GN=BICD2 PE=1 SV=1	BICD2	0.00909699	0.00524705	0.110657	-1.37184	-0.801378	0.95236	0.0435982	1		2	stabilized
Q9C0B1	Alpha-ketoglutarate-dependent dioxygenase FTO OS=Homo sapiens OX=9606 GN=FTO PE=1 SV=3	FTO	0.0341576	0.104725	0.10491	-2.49959	-1.32866	0.0540236	0.0551787	0		2	stabilized
P28340	DNA polymerase delta catalytic subunit OS=Homo sapiens OX=9606 GN=POLD1 PE=1 SV=2	POLD1	0.00816943	0.0894251	0.0978129	-2.11028	-1.11923	0.101107	0.072914	0		2	stabilized
A8MXV4	Nucleoside diphosphate-linked moiety X motif 19 OS=Homo sapiens OX=9606 GN=NUDT19 PE=1 SV=1	NUDT19	-0.00654123	0.0923716	0.0936083	-2.09148	-1.11669	0.0901121	0.0854592	0		2	stabilized
O95825	Quinone oxidoreductase-like protein 1 OS=Homo sapiens OX=9606 GN=CRYZL1 PE=1 SV=2	CRYZL1	0.0330352	0.0992427	0.0854069	-2.08408	-1.11669	0.0681889	0.114921	0		2	stabilized
Q13557	Calcium/calmodulin-dependent protein kinase type II subunit delta OS=Homo sapiens OX=9606 GN=CAMK2D PE=1 SV=3	CAMK2D	0.0746884	0.0809233	0.103891	-2.07629	-1.11669	0.138885	0.0574801	0		2	stabilized
Q9UN37	Vacuolar protein sorting-associated protein 4A OS=Homo sapiens OX=9606 GN=VPS4A PE=1 SV=1	VPS4A	0.0573051	0.0797884	0.104757	-2.07374	-1.11582	0.144659	0.0555199	0		2	stabilized
Q9Y4Z0	U6 snRNA-associated Sm-like protein LSm4 OS=Homo sapiens OX=9606 GN=LSM4 PE=1 SV=1	LSM4	-0.00156909	0.0782015	0.0997213	-1.96389	-1.06236	0.15304	0.0677396	0		2	stabilized
Q9H0R6	Glutamyl-tRNA(Gln) amidotransferase subunit A, mitochondrial OS=Homo sapiens OX=9606 GN=QRSL1 PE=1 SV=2	QRSL1	-0.0337503	0.101319	0.0731904	-1.9461	-1.05614	0.0625015	0.172929	0		2	stabilized
Q9HD26	Golgi-associated PDZ and coiled-coil motif-containing protein OS=Homo sapiens OX=9606 GN=GOPC PE=1 SV=1	GOPC	0.00172436	0.103684	0.0696997	-1.94247	-1.05561	0.056507	0.192978	0		2	stabilized
P62314	Small nuclear ribonucleoprotein Sm D1 OS=Homo sapiens OX=9606 GN=SNRPD1 PE=1 SV=1	SNRPD1	-0.100909	0.0713074	0.102142	-1.90342	-1.04561	0.193774	0.0616142	0		2	stabilized
O14561	Acyl carrier protein, mitochondrial OS=Homo sapiens OX=9606 GN=NDUFAB1 PE=1 SV=3	NDUFAB1	0.0945481	0.0728946	0.0996361	-1.88394	-1.03609	0.183755	0.0679638	0		2	stabilized
P00749	Urokinase-type plasminogen activator OS=Homo sapiens OX=9606 GN=PLAU PE=1 SV=2	PLAU	0.156257	0.0763186	0.0949181	-1.85663	-1.02613	0.163456	0.0813768	0		2	stabilized
Q8WUX2	Glutathione-specific gamma-glutamylcyclotransferase 2 OS=Homo sapiens OX=9606 GN=CHAC2 PE=1 SV=1	CHAC2	-0.0465518	0.089913	0.079402	-1.83429	-1.01477	0.0992162	0.141167	0		2	stabilized
P48723	Heat shock 70 kDa protein 13 OS=Homo sapiens OX=9606 GN=HSPA13 PE=1 SV=1	HSPA13	0.00605099	0.101518	0.0628533	-1.81421	-1.00791	0.0619777	0.237161	0		2	stabilized
Q9H0R4	Haloacid dehalogenase-like hydrolase domain-containing protein 2 OS=Homo sapiens OX=9606 GN=HDHD2 PE=1 SV=1	HDHD2	0.0589186	0.0665377	0.0994727	-1.79187	-0.996609	0.226285	0.0683961	0		2	stabilized
Q9NR31	GTP-binding protein SAR1a OS=Homo sapiens OX=9606 GN=SAR1A PE=1 SV=1	SAR1A	0.0617244	0.0876886	0.0788513	-1.78959	-0.995403	0.108072	0.143787	0		2	stabilized
P54725	UV excision repair protein RAD23 homolog A OS=Homo sapiens OX=9606 GN=RAD23A PE=1 SV=1	RAD23A	-0.0593996	0.0751482	0.0911412	-1.77903	-0.990352	0.170195	0.0935981	0		2	stabilized
P22059	Oxysterol-binding protein 1 OS=Homo sapiens OX=9606 GN=OSBP PE=1 SV=1	OSBP	0.0649841	0.0977632	0.0638436	-1.75912	-0.980757	0.0724961	0.230362	0		2	stabilized
P34896	Serine hydroxymethyltransferase, cytosolic OS=Homo sapiens OX=9606 GN=SHMT1 PE=1 SV=1	SHMT1	-0.0579036	0.0883481	0.0751574	-1.74827	-0.978663	0.105383	0.16234	0		2	stabilized
P10599	Thioredoxin OS=Homo sapiens OX=9606 GN=TXN PE=1 SV=3	TXN	0.0979298	0.0684872	0.0922176	-1.70058	-0.952877	0.212556	0.0899738	0		2	stabilized
Q8NBS9	Thioredoxin domain-containing protein 5 OS=Homo sapiens OX=9606 GN=TXNDC5 PE=1 SV=2	TXNDC5	0.0695393	0.0594515	0.0990757	-1.69163	-0.949396	0.281482	0.0694552	0		2	stabilized
O75351	Vacuolar protein sorting-associated protein 4B OS=Homo sapiens OX=9606 GN=VPS4B PE=1 SV=2	VPS4B	0.0657253	0.0621975	0.0967424	-1.6886	-0.948646	0.259096	0.0759557	0		2	stabilized
Q9H9J2	39S ribosomal protein L44, mitochondrial OS=Homo sapiens OX=9606 GN=MRPL44 PE=1 SV=1	MRPL44	-0.0265253	0.0881579	0.06989	-1.67339	-0.939886	0.106153	0.191843	0		2	stabilized
P52434	DNA-directed RNA polymerases I, II, and III subunit RPABC3 OS=Homo sapiens OX=9606 GN=POLR2H PE=1 SV=4	POLR2H	0.106987	0.101266	0.0484166	-1.6397	-0.926758	0.0626418	0.35253	0		2	stabilized
Q9Y5X3	Sorting nexin-5 OS=Homo sapiens OX=9606 GN=SNX5 PE=1 SV=1	SNX5	0.0574626	0.05607	0.0966047	-1.6083	-0.911974	0.310805	0.0763543	0		2	stabilized
P21912	Succinate dehydrogenase [ubiquinone] iron-sulfur subunit, mitochondrial OS=Homo sapiens OX=9606 GN=SDHB PE=1 SV=3	SDHB	-0.00500147	0.0887007	0.0635043	-1.59947	-0.907735	0.103968	0.232675	0		2	stabilized
O00231	26S proteasome non-ATPase regulatory subunit 11 OS=Homo sapiens OX=9606 GN=PSMD11 PE=1 SV=3	PSMD11	0.0232216	0.103407	0.0408031	-1.5983	-0.907735	0.0571825	0.425699	0		2	stabilized
Q9UHD2	Serine/threonine-protein kinase TBK1 OS=Homo sapiens OX=9606 GN=TBK1 PE=1 SV=1	TBK1	0.0493794	0.0954301	0.053943	-1.59805	-0.907735	0.0797384	0.304741	0		2	stabilized
P17301	Integrin alpha-2 OS=Homo sapiens OX=9606 GN=ITGA2 PE=1 SV=1	ITGA2	-0.0437385	0.0685036	0.0851205	-1.59108	-0.901347	0.212443	0.116079	0		2	stabilized
P62834	Ras-related protein Rap-1A OS=Homo sapiens OX=9606 GN=RAP1A PE=1 SV=1	RAP1A	-0.0393063	0.058567	0.0935119	-1.58943	-0.900846	0.288964	0.0857663	0		2	stabilized
O00754	Lysosomal alpha-mannosidase OS=Homo sapiens OX=9606 GN=MAN2B1 PE=1 SV=3	MAN2B1	0.00779654	0.0791272	0.0725222	-1.56551	-0.88957	0.148107	0.176641	0		2	stabilized
Q15370	Elongin-B OS=Homo sapiens OX=9606 GN=ELOB PE=1 SV=1	ELOB	-0.0255922	0.0468393	0.100112	-1.5576	-0.886544	0.400738	0.0667181	0		2	stabilized
Q8TDP1	Ribonuclease H2 subunit C OS=Homo sapiens OX=9606 GN=RNASEH2C PE=1 SV=1	RNASEH2C	0.156341	0.105983	0.0313876	-1.55483	-0.885429	0.0511471	0.527421	0		2	stabilized
Q9H078	Caseinolytic peptidase B protein homolog OS=Homo sapiens OX=9606 GN=CLPB PE=1 SV=1	CLPB	-0.00316265	0.100629	0.0412008	-1.55142	-0.884315	0.0643465	0.42167	0		2	stabilized
Q9GZZ9	Ubiquitin-like modifier-activating enzyme 5 OS=Homo sapiens OX=9606 GN=UBA5 PE=1 SV=1	UBA5	-0.0336337	0.0374532	0.105498	-1.54952	-0.884315	0.506591	0.0538869	0		2	stabilized
Q9NR46	Endophilin-B2 OS=Homo sapiens OX=9606 GN=SH3GLB2 PE=1 SV=1	SH3GLB2	0.0105508	0.083496	0.0651414	-1.53597	-0.875306	0.126453	0.221663	0		2	stabilized
P01111	GTPase NRas OS=Homo sapiens OX=9606 GN=NRAS PE=1 SV=1	NRAS	-0.092156	0.0928226	0.0518044	-1.52846	-0.872101	0.0885175	0.322699	0		2	stabilized
P52565	Rho GDP-dissociation inhibitor 1 OS=Homo sapiens OX=9606 GN=ARHGDIA PE=1 SV=3	ARHGDIA	0.0110882	0.0617257	0.0863583	-1.51837	-0.866278	0.262852	0.111141	0		2	stabilized
O95208	Epsin-2 OS=Homo sapiens OX=9606 GN=EPN2 PE=1 SV=3	EPN2	-0.0392554	0.0537739	0.0927234	-1.51751	-0.865954	0.331825	0.0883103	0		2	stabilized
Q92905	COP9 signalosome complex subunit 5 OS=Homo sapiens OX=9606 GN=COPS5 PE=1 SV=4	COPS5	-0.00752966	0.0405481	0.101639	-1.51501	-0.865954	0.470149	0.0628489	0		2	stabilized
Q9P0J1	[Pyruvate dehydrogenase [acetyl-transferring]]-phosphatase 1, mitochondrial OS=Homo sapiens OX=9606 GN=PDP1 PE=1 SV=3	PDP1	0.0378725	0.0838544	0.0617224	-1.49849	-0.857657	0.124793	0.245098	0		2	stabilized
Q9NSE4	Isoleucine--tRNA ligase, mitochondrial OS=Homo sapiens OX=9606 GN=IARS2 PE=1 SV=2	IARS2	0.0281	0.0907235	0.0520037	-1.49512	-0.856313	0.096137	0.320997	0		2	stabilized
Q96PZ0	Pseudouridylate synthase 7 homolog OS=Homo sapiens OX=9606 GN=PUS7 PE=1 SV=2	PUS7	-0.00997573	0.0458997	0.0964432	-1.48623	-0.854844	0.410696	0.0768239	0		2	stabilized
P06733	Alpha-enolase OS=Homo sapiens OX=9606 GN=ENO1 PE=1 SV=2	ENO1	0.0175593	0.0520636	0.0912702	-1.47397	-0.847867	0.348065	0.0931577	0		2	stabilized
Q9BVA1	Tubulin beta-2B chain OS=Homo sapiens OX=9606 GN=TUBB2B PE=1 SV=1	TUBB2B	0.0761387	0.104673	0.024984	-1.47294	-0.847867	0.0541455	0.603075	0		2	stabilized
P43490	Nicotinamide phosphoribosyltransferase OS=Homo sapiens OX=9606 GN=NAMPT PE=1 SV=1	NAMPT	-0.000580112	0.0614332	0.0834194	-1.47036	-0.847485	0.265199	0.123146	0		2	stabilized
Q9HCC0	Methylcrotonoyl-CoA carboxylase beta chain, mitochondrial OS=Homo sapiens OX=9606 GN=MCCC2 PE=1 SV=1	MCCC2	-0.0121939	0.0296101	0.104954	-1.46405	-0.843612	0.605182	0.0550816	0		2	stabilized
P00390	Glutathione reductase, mitochondrial OS=Homo sapiens OX=9606 GN=GSR PE=1 SV=2	GSR	-0.0135197	0.103629	0.0260967	-1.46314	-0.843612	0.056641	0.589585	0		2	stabilized
Q96S44	EKC/KEOPS complex subunit TP53RK OS=Homo sapiens OX=9606 GN=TP53RK PE=1 SV=2	TP53RK	0.00838781	0.0872591	0.05421	-1.46303	-0.843612	0.109851	0.302546	0		2	stabilized
P09211	Glutathione S-transferase P OS=Homo sapiens OX=9606 GN=GSTP1 PE=1 SV=2	GSTP1	-0.0339574	0.104203	0.0243127	-1.45839	-0.840937	0.0552573	0.611281	0		2	stabilized
P29083	General transcription factor IIE subunit 1 OS=Homo sapiens OX=9606 GN=GTF2E1 PE=1 SV=2	GTF2E1	-0.0340633	0.0409859	0.0974902	-1.45016	-0.83612	0.465114	0.0738205	0		2	stabilized
P10768	S-formylglutathione hydrolase OS=Homo sapiens OX=9606 GN=ESD PE=1 SV=2	ESD	0.104267	0.0814782	0.0604022	-1.44471	-0.833575	0.136127	0.254596	0		2	stabilized
P08238	Heat shock protein HSP 90-beta OS=Homo sapiens OX=9606 GN=HSP90AB1 PE=1 SV=4	HSP90AB1	0.0333552	0.0920317	0.0453618	-1.4439	-0.833251	0.091329	0.380878	0		2	stabilized
P13693	Translationally-controlled tumor protein OS=Homo sapiens OX=9606 GN=TPT1 PE=1 SV=1	TPT1	-0.0572423	0.097476	0.0353785	-1.43686	-0.828807	0.0733575	0.48285	0		2	stabilized
Q9Y277	Voltage-dependent anion-selective channel protein 3 OS=Homo sapiens OX=9606 GN=VDAC3 PE=1 SV=1	VDAC3	0.0262345	0.0893878	0.048481	-1.43328	-0.828807	0.101253	0.351948	0		2	stabilized
Q96KB5	Lymphokine-activated killer T-cell-originated protein kinase OS=Homo sapiens OX=9606 GN=PBK PE=1 SV=3	PBK	0.0577912	0.0605317	0.0816751	-1.43289	-0.828807	0.272524	0.130736	0		2	stabilized
P14859	POU domain, class 2, transcription factor 1 OS=Homo sapiens OX=9606 GN=POU2F1 PE=1 SV=2	POU2F1	0.0357415	0.0885172	0.04974	-1.4328	-0.828807	0.104703	0.340675	0		2	stabilized
Q9Y315	Deoxyribose-phosphate aldolase OS=Homo sapiens OX=9606 GN=DERA PE=1 SV=2	DERA	0.0429345	0.0787518	0.0623574	-1.42691	-0.826878	0.150092	0.240619	0		2	stabilized
Q8TCA0	Leucine-rich repeat-containing protein 20 OS=Homo sapiens OX=9606 GN=LRRC20 PE=1 SV=1	LRRC20	0.0145553	0.100897	0.0269227	-1.42016	-0.824337	0.0636251	0.579661	0		2	stabilized
O43681	ATPase ASNA1 OS=Homo sapiens OX=9606 GN=ASNA1 PE=1 SV=2	ASNA1	-0.036886	0.0976158	0.0333133	-1.41959	-0.824337	0.0729369	0.505656	0		2	stabilized
Q99729	Heterogeneous nuclear ribonucleoprotein A/B OS=Homo sapiens OX=9606 GN=HNRNPAB PE=1 SV=2	HNRNPAB	0.13532	0.0293026	0.102106	-1.41217	-0.821544	0.609216	0.0617023	0		2	stabilized
O95396	Adenylyltransferase and sulfurtransferase MOCS3 OS=Homo sapiens OX=9606 GN=MOCS3 PE=1 SV=1	MOCS3	0.047528	0.0672477	0.0734761	-1.406	-0.818806	0.221214	0.171359	0		2	stabilized
Q13043	Serine/threonine-protein kinase 4 OS=Homo sapiens OX=9606 GN=STK4 PE=1 SV=2	STK4	0.00138055	0.080763	0.0575201	-1.39857	-0.815016	0.139689	0.276214	0		2	stabilized
Q9UNH7	Sorting nexin-6 OS=Homo sapiens OX=9606 GN=SNX6 PE=1 SV=1	SNX6	-0.0150427	0.0842479	0.0525708	-1.39541	-0.813211	0.122988	0.316186	0		2	stabilized
Q9UHG3	Prenylcysteine oxidase 1 OS=Homo sapiens OX=9606 GN=PCYOX1 PE=1 SV=3	PCYOX1	-0.0256991	0.0771365	0.0614165	-1.39071	-0.809989	0.158868	0.247276	0		2	stabilized
Q96AX1	Vacuolar protein sorting-associated protein 33A OS=Homo sapiens OX=9606 GN=VPS33A PE=1 SV=1	VPS33A	-0.0438501	0.0936404	0.0369196	-1.38483	-0.806671	0.0856839	0.466202	0		2	stabilized
Q7L2H7	Eukaryotic translation initiation factor 3 subunit M OS=Homo sapiens OX=9606 GN=EIF3M PE=1 SV=1	EIF3M	0.0614117	0.0693208	0.0690929	-1.37563	-0.802803	0.206872	0.196631	0		2	stabilized
O75663	TIP41-like protein OS=Homo sapiens OX=9606 GN=TIPRL PE=1 SV=2	TIPRL	0.018758	0.0834695	0.0518011	-1.37423	-0.801972	0.126577	0.322727	0		2	stabilized
P00846	ATP synthase subunit a OS=Homo sapiens OX=9606 GN=MT-ATP6 PE=1 SV=1	MT-ATP6	0.0761839	0.0767723	0.0598641	-1.3661	-0.798107	0.160899	0.258541	0		2	stabilized
Q92947	Glutaryl-CoA dehydrogenase, mitochondrial OS=Homo sapiens OX=9606 GN=GCDH PE=1 SV=1	GCDH	-0.0698358	0.0475618	0.0874679	-1.36254	-0.796299	0.393182	0.106856	0		2	stabilized
Q8N983	39S ribosomal protein L43, mitochondrial OS=Homo sapiens OX=9606 GN=MRPL43 PE=1 SV=1	MRPL43	-0.0276447	0.0802802	0.0550586	-1.3619	-0.796094	0.142134	0.295641	0		2	stabilized
P13798	Acylamino-acid-releasing enzyme OS=Homo sapiens OX=9606 GN=APEH PE=1 SV=4	APEH	0.0200649	0.0825307	0.0517808	-1.35915	-0.7953	0.131012	0.322901	0		2	stabilized
P61224	Ras-related protein Rap-1b OS=Homo sapiens OX=9606 GN=RAP1B PE=1 SV=1	RAP1B	-0.112649	0.0951231	0.0313526	-1.35738	-0.7953	0.0807339	0.527821	0		2	stabilized
P40227	T-complex protein 1 subunit zeta OS=Homo sapiens OX=9606 GN=CCT6A PE=1 SV=3	CCT6A	0.0522106	0.0857423	0.0469586	-1.35678	-0.7953	0.116323	0.365889	0		2	stabilized
P55084	Trifunctional enzyme subunit beta, mitochondrial OS=Homo sapiens OX=9606 GN=HADHB PE=1 SV=3	HADHB	0.0408427	0.0411125	0.0915975	-1.35624	-0.79519	0.463663	0.0920478	0		2	stabilized
P62993	Growth factor receptor-bound protein 2 OS=Homo sapiens OX=9606 GN=GRB2 PE=1 SV=1	GRB2	-0.0392717	0.0458152	0.0881158	-1.35289	-0.792908	0.411599	0.104415	0		2	stabilized
P06703	Protein S100-A6 OS=Homo sapiens OX=9606 GN=S100A6 PE=1 SV=1	S100A6	-0.00657386	0.100974	0.018748	-1.35267	-0.792908	0.063417	0.68111	0		2	stabilized
Q13636	Ras-related protein Rab-31 OS=Homo sapiens OX=9606 GN=RAB31 PE=1 SV=1	RAB31	0.0238288	0.074677	0.0611214	-1.35044	-0.791915	0.172967	0.249391	0		2	stabilized
Q9BYC9	39S ribosomal protein L20, mitochondrial OS=Homo sapiens OX=9606 GN=MRPL20 PE=1 SV=1	MRPL20	-0.0459004	0.0917239	0.0362907	-1.3459	-0.788695	0.0924427	0.472957	0		2	stabilized
Q7Z406	Myosin-14 OS=Homo sapiens OX=9606 GN=MYH14 PE=1 SV=2	MYH14	-0.0955127	0.0732929	0.0617991	-1.3386	-0.784754	0.181302	0.244554	0		2	stabilized
P61970	Nuclear transport factor 2 OS=Homo sapiens OX=9606 GN=NUTF2 PE=1 SV=1	NUTF2	-0.0543764	0.081735	0.0508578	-1.3362	-0.784418	0.134865	0.330863	0		2	stabilized
O75390	Citrate synthase, mitochondrial OS=Homo sapiens OX=9606 GN=CS PE=1 SV=2	CS	0.0399924	0.0713075	0.0638455	-1.33569	-0.784418	0.193773	0.230349	0		2	stabilized
P48637	Glutathione synthetase OS=Homo sapiens OX=9606 GN=GSS PE=1 SV=1	GSS	-0.117525	0.0850645	0.0458472	-1.33384	-0.784239	0.119311	0.376282	0		2	stabilized
Q14240	Eukaryotic initiation factor 4A-II OS=Homo sapiens OX=9606 GN=EIF4A2 PE=1 SV=2	EIF4A2	0.045609	0.0942219	0.030295	-1.33198	-0.7828	0.0837141	0.53998	0		2	stabilized
Q68EM7	Rho GTPase-activating protein 17 OS=Homo sapiens OX=9606 GN=ARHGAP17 PE=1 SV=1	ARHGAP17	0.0807562	0.0724147	0.0619796	-1.32812	-0.781028	0.186743	0.243276	0		2	stabilized
Q16875	6-phosphofructo-2-kinase/fructose-2,6-bisphosphatase 3 OS=Homo sapiens OX=9606 GN=PFKFB3 PE=1 SV=1	PFKFB3	-0.013621	0.0439551	0.087541	-1.32354	-0.778585	0.431765	0.106578	0		2	stabilized
Q86SX6	Glutaredoxin-related protein 5, mitochondrial OS=Homo sapiens OX=9606 GN=GLRX5 PE=1 SV=2	GLRX5	-0.058146	0.106107	0.00151188	-1.32318	-0.778585	0.0508696	0.912741	0		2	stabilized
Q9NZE8	39S ribosomal protein L35, mitochondrial OS=Homo sapiens OX=9606 GN=MRPL35 PE=1 SV=3	MRPL35	-0.078148	0.0292566	0.0966457	-1.32037	-0.778364	0.609821	0.0762353	0		2	stabilized
Q9C004	Protein sprouty homolog 4 OS=Homo sapiens OX=9606 GN=SPRY4 PE=1 SV=2	SPRY4	-0.072063	0.0273562	0.0976911	-1.32029	-0.778364	0.635026	0.073255	0		2	stabilized
P14618	Pyruvate kinase PKM OS=Homo sapiens OX=9606 GN=PKM PE=1 SV=4	PKM	-0.0287231	0.101972	0.0116402	-1.31615	-0.777867	0.0607963	0.774364	0		2	stabilized
Q9H488	GDP-fucose protein O-fucosyltransferase 1 OS=Homo sapiens OX=9606 GN=POFUT1 PE=1 SV=1	POFUT1	0.0147007	0.0958314	0.0248305	-1.31142	-0.775018	0.0784525	0.604948	0		2	stabilized
Q08722	Leukocyte surface antigen CD47 OS=Homo sapiens OX=9606 GN=CD47 PE=1 SV=1	CD47	-0.0229917	0.0927364	0.0297897	-1.30179	-0.768389	0.0888206	0.545838	0		2	stabilized
P23526	Adenosylhomocysteinase OS=Homo sapiens OX=9606 GN=AHCY PE=1 SV=4	AHCY	0.0110755	0.0555877	0.0768246	-1.30061	-0.76785	0.315145	0.153754	0		2	stabilized
Q9Y6I9	Testis-expressed protein 264 OS=Homo sapiens OX=9606 GN=TEX264 PE=1 SV=1	TEX264	0.0326995	0.0783659	0.0518577	-1.29555	-0.76379	0.152154	0.322243	0		2	stabilized
Q13405	39S ribosomal protein L49, mitochondrial OS=Homo sapiens OX=9606 GN=MRPL49 PE=1 SV=1	MRPL49	-0.0506788	0.0506866	0.0803983	-1.29293	-0.762185	0.361502	0.136519	0		2	stabilized
Q96FX7	tRNA (adenine(58)-N(1))-methyltransferase catalytic subunit TRMT61A OS=Homo sapiens OX=9606 GN=TRMT61A PE=1 SV=1	TRMT61A	0.0584207	0.0520951	0.0788357	-1.28698	-0.758632	0.347763	0.143862	0		2	stabilized
Q8NBF2	NHL repeat-containing protein 2 OS=Homo sapiens OX=9606 GN=NHLRC2 PE=1 SV=1	NHLRC2	0.0552982	0.0602909	0.0712927	-1.28345	-0.757486	0.274504	0.183626	0		2	stabilized
O43432	Eukaryotic translation initiation factor 4 gamma 3 OS=Homo sapiens OX=9606 GN=EIF4G3 PE=1 SV=2	EIF4G3	-0.00590733	0.069025	0.0620967	-1.28137	-0.756201	0.208876	0.24245	0		2	stabilized
P25787	Proteasome subunit alpha type-2 OS=Homo sapiens OX=9606 GN=PSMA2 PE=1 SV=2	PSMA2	-0.0891311	0.079717	0.0486203	-1.2799	-0.756044	0.145029	0.350689	0		2	stabilized
P51570	Galactokinase OS=Homo sapiens OX=9606 GN=GALK1 PE=1 SV=1	GALK1	-0.0207103	0.00856439	0.104007	-1.27694	-0.754931	0.9029	0.0572154	0		2	stabilized
Q9BUF5	Tubulin beta-6 chain OS=Homo sapiens OX=9606 GN=TUBB6 PE=1 SV=1	TUBB6	-0.0362575	0.0779677	0.0499368	-1.26782	-0.749714	0.154305	0.338935	0		2	stabilized
Q9BZI7	Regulator of nonsense transcripts 3B OS=Homo sapiens OX=9606 GN=UPF3B PE=1 SV=1	UPF3B	0.0212491	0.0524074	0.0770168	-1.26476	-0.747719	0.344761	0.152787	0		2	stabilized
P04843	Dolichyl-diphosphooligosaccharide--protein glycosyltransferase subunit 1 OS=Homo sapiens OX=9606 GN=RPN1 PE=1 SV=1	RPN1	0.0973584	0.000762203	0.104281	-1.26465	-0.747719	0.980514	0.0565907	0		2	stabilized
Q9BTX1	Nucleoporin NDC1 OS=Homo sapiens OX=9606 GN=NDC1 PE=1 SV=2	NDC1	-0.0550364	0.0759912	0.0520031	-1.26145	-0.745693	0.165321	0.321002	0		2	stabilized
Q5TCQ9	Membrane-associated guanylate kinase, WW and PDZ domain-containing protein 3 OS=Homo sapiens OX=9606 GN=MAGI3 PE=1 SV=3	MAGI3	-0.142234	0.0483716	0.0800513	-1.26108	-0.745693	0.384814	0.138124	0		2	stabilized
O60256	Phosphoribosyl pyrophosphate synthase-associated protein 2 OS=Homo sapiens OX=9606 GN=PRPSAP2 PE=1 SV=1	PRPSAP2	-0.0240787	0.102753	0.00148352	-1.26028	-0.745281	0.0588067	0.913134	0		2	stabilized
P40123	Adenylyl cyclase-associated protein 2 OS=Homo sapiens OX=9606 GN=CAP2 PE=1 SV=1	CAP2	0.0191847	0.0308861	0.0917887	-1.25716	-0.744091	0.588569	0.0914043	0		2	stabilized
Q9Y305	Acyl-coenzyme A thioesterase 9, mitochondrial OS=Homo sapiens OX=9606 GN=ACOT9 PE=1 SV=2	ACOT9	0.113873	0.0893653	0.0309293	-1.25531	-0.743451	0.101341	0.532671	0		2	stabilized
P49005	DNA polymerase delta subunit 2 OS=Homo sapiens OX=9606 GN=POLD2 PE=1 SV=1	POLD2	-0.00942258	0.0905237	0.0285055	-1.25262	-0.742887	0.0968887	0.560867	0		2	stabilized
Q9H974	Queuine tRNA-ribosyltransferase accessory subunit 2 OS=Homo sapiens OX=9606 GN=QTRT2 PE=1 SV=1	QTRT2	0.0727489	0.0828836	0.0414268	-1.25253	-0.742887	0.129331	0.419391	0		2	stabilized
Q9HD33	39S ribosomal protein L47, mitochondrial OS=Homo sapiens OX=9606 GN=MRPL47 PE=1 SV=2	MRPL47	0.0582264	0.0181193	0.0979232	-1.24561	-0.738285	0.763174	0.0726064	0		2	stabilized
P19838	Nuclear factor NF-kappa-B p105 subunit OS=Homo sapiens OX=9606 GN=NFKB1 PE=1 SV=2	NFKB1	0.0543297	0.0775201	0.0483385	-1.24329	-0.737102	0.156749	0.353238	0		2	stabilized
Q9BTU6	Phosphatidylinositol 4-kinase type 2-alpha OS=Homo sapiens OX=9606 GN=PI4K2A PE=1 SV=1	PI4K2A	0.0304241	0.0775066	0.0479326	-1.23862	-0.733947	0.156823	0.356931	0		2	stabilized
P60903	Protein S100-A10 OS=Homo sapiens OX=9606 GN=S100A10 PE=1 SV=2	S100A10	0.0625086	0.0368196	0.086469	-1.23224	-0.73147	0.514231	0.110707	0		2	stabilized
Q8WVM8	Sec1 family domain-containing protein 1 OS=Homo sapiens OX=9606 GN=SCFD1 PE=1 SV=4	SCFD1	0.016886	0.0652128	0.0623157	-1.23162	-0.731454	0.235971	0.240911	0		2	stabilized
Q5JTZ9	Alanine--tRNA ligase, mitochondrial OS=Homo sapiens OX=9606 GN=AARS2 PE=1 SV=1	AARS2	0.0254008	0.0340914	0.0881005	-1.23018	-0.730758	0.547798	0.104472	0		2	stabilized
P18031	Tyrosine-protein phosphatase non-receptor type 1 OS=Homo sapiens OX=9606 GN=PTPN1 PE=1 SV=1	PTPN1	-0.0270887	0.0734307	0.0523628	-1.22781	-0.729876	0.180459	0.317944	0		2	stabilized
O95298	NADH dehydrogenase [ubiquinone] 1 subunit C2 OS=Homo sapiens OX=9606 GN=NDUFC2 PE=1 SV=1	NDUFC2	-0.0488083	0.0129952	0.0991476	-1.22637	-0.729265	0.837454	0.0692624	0		2	stabilized
Q9Y6M9	NADH dehydrogenase [ubiquinone] 1 beta subcomplex subunit 9 OS=Homo sapiens OX=9606 GN=NDUFB9 PE=1 SV=3	NDUFB9	0.0732023	0.0299514	0.0903603	-1.22588	-0.729265	0.600717	0.0963002	0		2	stabilized
Q92541	RNA polymerase-associated protein RTF1 homolog OS=Homo sapiens OX=9606 GN=RTF1 PE=1 SV=4	RTF1	-0.0111836	0.0205425	0.0954973	-1.22545	-0.729265	0.728748	0.0796225	0		2	stabilized
Q8NFJ5	Retinoic acid-induced protein 3 OS=Homo sapiens OX=9606 GN=GPRC5A PE=1 SV=2	GPRC5A	0.212184	0.0883852	0.0289634	-1.22108	-0.726926	0.105234	0.555484	0		2	stabilized
P21291	Cysteine and glycine-rich protein 1 OS=Homo sapiens OX=9606 GN=CSRP1 PE=1 SV=3	CSRP1	0.159603	0.0200631	0.0953724	-1.21947	-0.726517	0.735518	0.0799982	0		2	stabilized
Q9BR76	Coronin-1B OS=Homo sapiens OX=9606 GN=CORO1B PE=1 SV=1	CORO1B	0.0996477	0.0944448	0.0165738	-1.21928	-0.726517	0.0829688	0.709197	0		2	stabilized
Q9UPT5	Exocyst complex component 7 OS=Homo sapiens OX=9606 GN=EXOC7 PE=1 SV=3	EXOC7	-0.0218907	0.0634137	0.0631576	-1.21807	-0.726414	0.249587	0.235057	0		2	stabilized
P16333	Cytoplasmic protein NCK1 OS=Homo sapiens OX=9606 GN=NCK1 PE=1 SV=1	NCK1	-0.00523153	0.0128747	0.09861	-1.2165	-0.726414	0.83922	0.0707147	0		2	stabilized
P00568	Adenylate kinase isoenzyme 1 OS=Homo sapiens OX=9606 GN=AK1 PE=1 SV=3	AK1	0.0018136	0.0597639	0.0666665	-1.21532	-0.726414	0.278871	0.211743	0		2	stabilized
Q9Y6N5	Sulfide:quinone oxidoreductase, mitochondrial OS=Homo sapiens OX=9606 GN=SQOR PE=1 SV=1	SQOR	-0.019467	0.0704048	0.0549312	-1.21404	-0.726085	0.199648	0.296672	0		2	stabilized
O95861	3'(2'),5'-bisphosphate nucleotidase 1 OS=Homo sapiens OX=9606 GN=BPNT1 PE=1 SV=1	BPNT1	0.0251374	0.0906169	0.0238867	-1.21371	-0.726085	0.0965376	0.616514	0		2	stabilized
Q9UKD2	mRNA turnover protein 4 homolog OS=Homo sapiens OX=9606 GN=MRTO4 PE=1 SV=2	MRTO4	0.0640228	0.0887331	0.027092	-1.2101	-0.724272	0.103838	0.577637	0		2	stabilized
Q15404	Ras suppressor protein 1 OS=Homo sapiens OX=9606 GN=RSU1 PE=1 SV=3	RSU1	-0.043735	0.0604383	0.0655813	-1.20996	-0.724272	0.273291	0.218768	0		2	stabilized
P55769	NHP2-like protein 1 OS=Homo sapiens OX=9606 GN=SNU13 PE=1 SV=3	SNU13	-0.0237066	0.0905243	0.022822	-1.20312	-0.720526	0.0968864	0.629678	0		2	stabilized
Q86W56	Poly(ADP-ribose) glycohydrolase OS=Homo sapiens OX=9606 GN=PARG PE=1 SV=1	PARG	0.029056	0.0521463	0.072531	-1.19924	-0.71912	0.347269	0.176592	0		2	stabilized
Q9H3H3	UPF0696 protein C11orf68 OS=Homo sapiens OX=9606 GN=C11orf68 PE=1 SV=3	C11orf68	0.00201538	0.0325259	0.0869634	-1.19755	-0.71912	0.567536	0.108787	0		2	stabilized
O14776	Transcription elongation regulator 1 OS=Homo sapiens OX=9606 GN=TCERG1 PE=1 SV=2	TCERG1	0.0473822	0.0262899	0.0905744	-1.19594	-0.718345	0.649358	0.095553	0		2	stabilized
Q6WCQ1	Myosin phosphatase Rho-interacting protein OS=Homo sapiens OX=9606 GN=MPRIP PE=1 SV=3	MPRIP	-0.0841688	0.0587741	0.0658724	-1.19237	-0.71619	0.2872	0.216868	0		2	stabilized
Q96AC1	Fermitin family homolog 2 OS=Homo sapiens OX=9606 GN=FERMT2 PE=1 SV=1	FERMT2	0.0164953	0.0568795	0.067534	-1.1901	-0.714649	0.303608	0.206247	0		2	stabilized
Q9NYK5	39S ribosomal protein L39, mitochondrial OS=Homo sapiens OX=9606 GN=MRPL39 PE=1 SV=3	MRPL39	-0.00335691	0.0745121	0.0473836	-1.18795	-0.713541	0.173945	0.361963	0		2	stabilized
O75746	Calcium-binding mitochondrial carrier protein Aralar1 OS=Homo sapiens OX=9606 GN=SLC25A12 PE=1 SV=2	SLC25A12	-0.0213846	0.0351589	0.0844671	-1.18536	-0.713404	0.534535	0.118755	0		2	stabilized
P29373	Cellular retinoic acid-binding protein 2 OS=Homo sapiens OX=9606 GN=CRABP2 PE=1 SV=2	CRABP2	-0.00083162	0.0978651	0.00332978	-1.18367	-0.712454	0.0721922	0.88758	0		2	stabilized
Q6DKJ4	Nucleoredoxin OS=Homo sapiens OX=9606 GN=NXN PE=1 SV=2	NXN	-0.026381	0.070386	0.0520478	-1.18041	-0.710203	0.199771	0.320621	0		2	stabilized
O75531	Barrier-to-autointegration factor OS=Homo sapiens OX=9606 GN=BANF1 PE=1 SV=1	BANF1	-0.186194	0.0899382	0.0210192	-1.17822	-0.708364	0.099119	0.652235	0		2	stabilized
Q16658	Fascin OS=Homo sapiens OX=9606 GN=FSCN1 PE=1 SV=3	FSCN1	0.0459755	0.0850046	0.0302522	-1.17764	-0.708135	0.119577	0.540475	0		2	stabilized
O43324	Eukaryotic translation elongation factor 1 epsilon-1 OS=Homo sapiens OX=9606 GN=EEF1E1 PE=1 SV=1	EEF1E1	-0.113253	0.0711822	0.0497772	-1.1661	-0.701633	0.194581	0.340345	0		2	stabilized
Q8N0X7	Spartin OS=Homo sapiens OX=9606 GN=SPART PE=1 SV=1	SPART	-0.0349659	0.0128286	0.0955443	-1.16562	-0.701633	0.839896	0.0794816	0		2	stabilized
P51149	Ras-related protein Rab-7a OS=Homo sapiens OX=9606 GN=RAB7A PE=1 SV=1	RAB7A	0.00485137	0.0715974	0.0491267	-1.16479	-0.701633	0.191914	0.346137	0		2	stabilized
Q9UKY7	Protein CDV3 homolog OS=Homo sapiens OX=9606 GN=CDV3 PE=1 SV=1	CDV3	-0.0406543	0.00911225	0.0970105	-1.16267	-0.700752	0.894762	0.0751844	0		2	stabilized
Q76L83	Putative Polycomb group protein ASXL2 OS=Homo sapiens OX=9606 GN=ASXL2 PE=1 SV=1	ASXL2	0.0404697	0.0353596	0.0826636	-1.16044	-0.700235	0.53206	0.126392	0		2	stabilized
P08243	Asparagine synthetase [glutamine-hydrolyzing] OS=Homo sapiens OX=9606 GN=ASNS PE=1 SV=4	ASNS	-0.0156262	0.0734118	0.0461848	-1.15881	-0.700235	0.180574	0.373106	0		2	stabilized
Q96J01	THO complex subunit 3 OS=Homo sapiens OX=9606 GN=THOC3 PE=1 SV=1	THOC3	0.0487034	0.0946354	0.00765304	-1.15633	-0.6985	0.0823357	0.828241	0		2	stabilized
Q96HE7	ERO1-like protein alpha OS=Homo sapiens OX=9606 GN=ERO1A PE=1 SV=2	ERO1A	0.0401834	0.0762734	0.0415089	-1.15171	-0.695576	0.163713	0.418565	0		2	stabilized
O60294	tRNA wybutosine-synthesizing protein 4 OS=Homo sapiens OX=9606 GN=LCMT2 PE=1 SV=3	LCMT2	-0.0503857	0.0678871	0.0525039	-1.15056	-0.695103	0.216716	0.316751	0		2	stabilized
O14818	Proteasome subunit alpha type-7 OS=Homo sapiens OX=9606 GN=PSMA7 PE=1 SV=1	PSMA7	-0.0208311	0.0212908	0.0901163	-1.14565	-0.692784	0.718222	0.097157	0		2	stabilized
Q9P2N5	RNA-binding protein 27 OS=Homo sapiens OX=9606 GN=RBM27 PE=1 SV=2	RBM27	0.0177876	0.0466734	0.0729047	-1.14099	-0.69156	0.402486	0.174509	0		2	stabilized
Q8TCT9	Minor histocompatibility antigen H13 OS=Homo sapiens OX=9606 GN=HM13 PE=1 SV=1	HM13	0.0781775	0.0741329	0.0429591	-1.13506	-0.689934	0.176208	0.404129	0		2	stabilized
Q9UL33	Trafficking protein particle complex subunit 2-like protein OS=Homo sapiens OX=9606 GN=TRAPPC2L PE=1 SV=1	TRAPPC2L	-0.0653706	0.0861137	0.0231217	-1.13271	-0.689418	0.114711	0.62596	0		2	stabilized
P61026	Ras-related protein Rab-10 OS=Homo sapiens OX=9606 GN=RAB10 PE=1 SV=1	RAB10	-0.0374643	0.0715171	0.0457001	-1.12619	-0.685642	0.192427	0.377671	0		2	stabilized
Q9C0C9	(E3-independent) E2 ubiquitin-conjugating enzyme OS=Homo sapiens OX=9606 GN=UBE2O PE=1 SV=3	UBE2O	0.00580513	0.0812701	0.0307068	-1.12262	-0.683052	0.137156	0.53523	0		2	stabilized
Q08379	Golgin subfamily A member 2 OS=Homo sapiens OX=9606 GN=GOLGA2 PE=1 SV=3	GOLGA2	0.00518565	0.0640862	0.0543799	-1.12045	-0.682121	0.244434	0.301156	0		2	stabilized
Q9BRT2	Ubiquinol-cytochrome-c reductase complex assembly factor 2 OS=Homo sapiens OX=9606 GN=UQCC2 PE=1 SV=1	UQCC2	-0.0873728	0.0891456	0.0147364	-1.11492	-0.678913	0.102203	0.733248	0		2	stabilized
O75381	Peroxisomal membrane protein PEX14 OS=Homo sapiens OX=9606 GN=PEX14 PE=1 SV=1	PEX14	-0.0113178	0.0656205	0.0520521	-1.11426	-0.678579	0.23296	0.320585	0		2	stabilized
P51648	Aldehyde dehydrogenase family 3 member A2 OS=Homo sapiens OX=9606 GN=ALDH3A2 PE=1 SV=1	ALDH3A2	0.00458821	0.0887478	0.0153893	-1.11334	-0.678501	0.10378	0.72467	0		2	stabilized
Q4G0F5	Vacuolar protein sorting-associated protein 26B OS=Homo sapiens OX=9606 GN=VPS26B PE=1 SV=2	VPS26B	0.0287627	0.0223928	0.0872508	-1.11047	-0.676395	0.702819	0.107683	0		2	stabilized
Q9NZM3	Intersectin-2 OS=Homo sapiens OX=9606 GN=ITSN2 PE=1 SV=3	ITSN2	-0.0169043	0.0342207	0.0798885	-1.10854	-0.675637	0.546183	0.138882	0		2	stabilized
Q01105	Protein SET OS=Homo sapiens OX=9606 GN=SET PE=1 SV=3	SET	-0.0166743	0.0233728	0.086562	-1.10828	-0.675637	0.689225	0.110344	0		2	stabilized
Q96FW1	Ubiquitin thioesterase OTUB1 OS=Homo sapiens OX=9606 GN=OTUB1 PE=1 SV=2	OTUB1	-0.0239775	0.0665548	0.0501316	-1.10527	-0.675637	0.226162	0.337217	0		2	stabilized
P35998	26S proteasome regulatory subunit 7 OS=Homo sapiens OX=9606 GN=PSMC2 PE=1 SV=3	PSMC2	0.0681576	0.0486152	0.0679184	-1.09609	-0.670643	0.382319	0.203845	0		2	stabilized
O15347	High mobility group protein B3 OS=Homo sapiens OX=9606 GN=HMGB3 PE=1 SV=4	HMGB3	-0.0460429	0.00700514	0.0936558	-1.09334	-0.669177	0.926113	0.0853085	0		2	stabilized
Q16222	UDP-N-acetylhexosamine pyrophosphorylase OS=Homo sapiens OX=9606 GN=UAP1 PE=1 SV=3	UAP1	-0.0231022	0.0305057	0.080953	-1.08845	-0.666547	0.5935	0.133983	0		2	stabilized
Q9HB71	Calcyclin-binding protein OS=Homo sapiens OX=9606 GN=CACYBP PE=1 SV=2	CACYBP	0.0145151	0.0522078	0.0639845	-1.08725	-0.666272	0.346677	0.229405	0		2	stabilized
Q9Y3D8	Adenylate kinase isoenzyme 6 OS=Homo sapiens OX=9606 GN=AK6 PE=1 SV=1	AK6	0.00169877	0.01471	0.0896037	-1.08499	-0.665672	0.812398	0.0989772	0		2	stabilized
Q9H000	Probable E3 ubiquitin-protein ligase makorin-2 OS=Homo sapiens OX=9606 GN=MKRN2 PE=1 SV=2	MKRN2	0.000719472	0.0512504	0.0646739	-1.08468	-0.665672	0.355962	0.224769	0		2	stabilized
O15014	Zinc finger protein 609 OS=Homo sapiens OX=9606 GN=ZNF609 PE=1 SV=2	ZNF609	0.0333863	0.0706445	0.0428715	-1.08372	-0.665404	0.198075	0.404992	0		2	stabilized
P61923	Coatomer subunit zeta-1 OS=Homo sapiens OX=9606 GN=COPZ1 PE=1 SV=1	COPZ1	-0.0784364	0.0750056	0.0364676	-1.08216	-0.66415	0.171031	0.471052	0		2	stabilized
P61586	Transforming protein RhoA OS=Homo sapiens OX=9606 GN=RHOA PE=1 SV=1	RHOA	0.0338907	0.0775298	0.0324365	-1.08124	-0.663539	0.156696	0.515507	0		2	stabilized
Q9UJW0	Dynactin subunit 4 OS=Homo sapiens OX=9606 GN=DCTN4 PE=1 SV=1	DCTN4	0.0204569	0.00257281	0.0946969	-1.08071	-0.66332	0.992376	0.0820549	0		2	stabilized
P20248	Cyclin-A2 OS=Homo sapiens OX=9606 GN=CCNA2 PE=1 SV=2	CCNA2	0.0563354	0.0487788	0.0665585	-1.08018	-0.663104	0.380649	0.212435	0		2	stabilized
Q03001	Dystonin OS=Homo sapiens OX=9606 GN=DST PE=1 SV=4	DST	0.0439695	0.0282724	0.0815156	-1.07605	-0.661594	0.622819	0.131448	0		2	stabilized
Q66K74	Microtubule-associated protein 1S OS=Homo sapiens OX=9606 GN=MAP1S PE=1 SV=2	MAP1S	0.00406652	0.0596432	0.0547531	-1.06652	-0.655573	0.279878	0.298115	0		2	stabilized
P49755	Transmembrane emp24 domain-containing protein 10 OS=Homo sapiens OX=9606 GN=TMED10 PE=1 SV=2	TMED10	0.0585732	0.061478	0.0525448	-1.06468	-0.654833	0.264839	0.316405	0		2	stabilized
P11177	Pyruvate dehydrogenase E1 component subunit beta, mitochondrial OS=Homo sapiens OX=9606 GN=PDHB PE=1 SV=3	PDHB	0.0092505	0.0873727	0.0118692	-1.06397	-0.654833	0.109379	0.7713	0		2	stabilized
Q93050	V-type proton ATPase 116 kDa subunit a isoform 1 OS=Homo sapiens OX=9606 GN=ATP6V0A1 PE=1 SV=3	ATP6V0A1	-0.052209	0.00982029	0.0905451	-1.06356	-0.654833	0.884262	0.0956552	0		2	stabilized
P13984	General transcription factor IIF subunit 2 OS=Homo sapiens OX=9606 GN=GTF2F2 PE=1 SV=2	GTF2F2	-0.167488	0.0552645	0.0579111	-1.04902	-0.646211	0.318076	0.27321	0		2	stabilized
P21127	Cyclin-dependent kinase 11B OS=Homo sapiens OX=9606 GN=CDK11B PE=1 SV=4	CDK11B	0.0770199	0.0725279	0.0366125	-1.04731	-0.645397	0.186035	0.469494	0		2	stabilized
Q9NZ32	Actin-related protein 10 OS=Homo sapiens OX=9606 GN=ACTR10 PE=1 SV=1	ACTR10	-0.0184949	0.0731841	0.0355239	-1.04621	-0.644654	0.181969	0.481265	0		2	stabilized
P55072	Transitional endoplasmic reticulum ATPase OS=Homo sapiens OX=9606 GN=VCP PE=1 SV=4	VCP	0.0480738	0.0541511	0.0586928	-1.04486	-0.644654	0.32831	0.267271	0		2	stabilized
Q9H6S0	3'-5' RNA helicase YTHDC2 OS=Homo sapiens OX=9606 GN=YTHDC2 PE=1 SV=2	YTHDC2	0.0306209	0.08992	0.00302949	-1.04428	-0.644654	0.099189	0.891729	0		2	stabilized
P24752	Acetyl-CoA acetyltransferase, mitochondrial OS=Homo sapiens OX=9606 GN=ACAT1 PE=1 SV=1	ACAT1	0.0189473	0.0204535	0.0839301	-1.0439	-0.644654	0.730002	0.12099	0		2	stabilized
Q92889	DNA repair endonuclease XPF OS=Homo sapiens OX=9606 GN=ERCC4 PE=1 SV=3	ERCC4	-0.0596775	0.033026	0.0761159	-1.04301	-0.644654	0.561194	0.157361	0		2	stabilized
Q6UW68	Transmembrane protein 205 OS=Homo sapiens OX=9606 GN=TMEM205 PE=1 SV=1	TMEM205	-0.00593343	0.0906969	0.000743981	-1.04246	-0.644404	0.0962368	0.923397	0		2	stabilized
Q9UJ70	N-acetyl-D-glucosamine kinase OS=Homo sapiens OX=9606 GN=NAGK PE=1 SV=4	NAGK	0.033827	0.0820803	0.0199368	-1.04173	-0.644088	0.133182	0.665935	0		2	stabilized
P30153	Serine/threonine-protein phosphatase 2A 65 kDa regulatory subunit A alpha isoform OS=Homo sapiens OX=9606 GN=PPP2R1A PE=1 SV=4	PPP2R1A	0.0435053	0.0499824	0.0624277	-1.04133	-0.644088	0.368498	0.240127	0		2	stabilized
P47895	Aldehyde dehydrogenase family 1 member A3 OS=Homo sapiens OX=9606 GN=ALDH1A3 PE=1 SV=2	ALDH1A3	-0.0361447	0.0647659	0.0463574	-1.03934	-0.64382	0.239303	0.371488	0		2	stabilized
Q92599	Septin-8 OS=Homo sapiens OX=9606 GN=SEPTIN8 PE=1 SV=4	SEPTIN8	-0.0655546	0.0902005	0.00140735	-1.03838	-0.643746	0.0981151	0.914191	0		2	stabilized
Q8NFH4	Nucleoporin Nup37 OS=Homo sapiens OX=9606 GN=NUP37 PE=1 SV=1	NUP37	-0.00101368	0.0439835	0.0674698	-1.03827	-0.643746	0.431453	0.20665	0		2	stabilized
Q15814	Tubulin-specific chaperone C OS=Homo sapiens OX=9606 GN=TBCC PE=1 SV=2	TBCC	-0.0614904	0.0201932	0.0836136	-1.03702	-0.64308	0.733678	0.122323	0		2	stabilized
O75496	Geminin OS=Homo sapiens OX=9606 GN=GMNN PE=1 SV=1	GMNN	-0.03982	0.0240886	0.0811146	-1.03297	-0.640398	0.679357	0.133251	0		2	stabilized
P56134	ATP synthase subunit f, mitochondrial OS=Homo sapiens OX=9606 GN=ATP5MF PE=1 SV=3	ATP5MF	-0.0426782	0.0801736	0.0223339	-1.03184	-0.639945	0.142679	0.635752	0		2	stabilized
P12268	Inosine-5'-monophosphate dehydrogenase 2 OS=Homo sapiens OX=9606 GN=IMPDH2 PE=1 SV=2	IMPDH2	0.0354142	0.00789877	0.089256	-1.02982	-0.63918	0.9128	0.100227	0		2	stabilized
Q9Y3B8	Oligoribonuclease, mitochondrial OS=Homo sapiens OX=9606 GN=REXO2 PE=1 SV=3	REXO2	0.251784	0.0202819	0.0830555	-1.02943	-0.63918	0.732425	0.1247	0		2	stabilized
Q16543	Hsp90 co-chaperone Cdc37 OS=Homo sapiens OX=9606 GN=CDC37 PE=1 SV=1	CDC37	0.0646164	0.0031722	0.0912483	-1.02933	-0.63918	0.983402	0.0932324	0		2	stabilized
Q9BSD7	Cancer-related nucleoside-triphosphatase OS=Homo sapiens OX=9606 GN=NTPCR PE=1 SV=1	NTPCR	-0.00643663	0.0516854	0.059495	-1.02502	-0.63631	0.351724	0.26127	0		2	stabilized
O75083	WD repeat-containing protein 1 OS=Homo sapiens OX=9606 GN=WDR1 PE=1 SV=4	WDR1	0.0283845	0.0769601	0.0270697	-1.02366	-0.635721	0.159849	0.577903	0		2	stabilized
O60711	Leupaxin OS=Homo sapiens OX=9606 GN=LPXN PE=1 SV=1	LPXN	0.0364703	0.045289	0.0648452	-1.01862	-0.633658	0.417246	0.223627	0		2	stabilized
Q8IU81	Interferon regulatory factor 2-binding protein 1 OS=Homo sapiens OX=9606 GN=IRF2BP1 PE=1 SV=1	IRF2BP1	0.0214246	0.0523966	0.0579682	-1.01493	-0.63284	0.344865	0.272773	0		2	stabilized
Q04760	Lactoylglutathione lyase OS=Homo sapiens OX=9606 GN=GLO1 PE=1 SV=4	GLO1	-0.0852772	0.029696	0.0763428	-1.01466	-0.63284	0.604057	0.156199	0		2	stabilized
A6NDU8	UPF0600 protein C5orf51 OS=Homo sapiens OX=9606 GN=C5orf51 PE=1 SV=1	C5orf51	-0.00835645	0.0630844	0.0459365	-1.01229	-0.63217	0.252137	0.375441	0		2	stabilized
P28482	Mitogen-activated protein kinase 1 OS=Homo sapiens OX=9606 GN=MAPK1 PE=1 SV=3	MAPK1	0.0699005	0.0624612	0.0464886	-1.01001	-0.631403	0.257013	0.370262	0		2	stabilized
Q9BY32	Inosine triphosphate pyrophosphatase OS=Homo sapiens OX=9606 GN=ITPA PE=1 SV=2	ITPA	-0.0248528	0.0529555	0.0569535	-1.00944	-0.631403	0.339534	0.280607	0		2	stabilized
Q16270	Insulin-like growth factor-binding protein 7 OS=Homo sapiens OX=9606 GN=IGFBP7 PE=1 SV=1	IGFBP7	0.0750166	0.0449901	0.0638179	-1.0022	-0.627712	0.420473	0.230536	0		2	stabilized
P98194	Calcium-transporting ATPase type 2C member 1 OS=Homo sapiens OX=9606 GN=ATP2C1 PE=1 SV=3	ATP2C1	-0.0374709	0.0166523	0.0830773	-1.00052	-0.62688	0.78425	0.124607	0		2	stabilized
P80303	Nucleobindin-2 OS=Homo sapiens OX=9606 GN=NUCB2 PE=1 SV=3	NUCB2	0.010411	0.0322962	0.0732171	-0.995638	-0.624449	0.570461	0.172782	0		2	stabilized
P26583	High mobility group protein B2 OS=Homo sapiens OX=9606 GN=HMGB2 PE=1 SV=2	HMGB2	0.0585293	0.0177829	0.0821402	-0.995588	-0.624449	0.767992	0.128678	0		2	stabilized
O94964	Protein SOGA1 OS=Homo sapiens OX=9606 GN=SOGA1 PE=1 SV=2	SOGA1	0.00273049	0.0218624	0.0796065	-0.991984	-0.622508	0.710218	0.140203	0		2	stabilized
Q9Y5Y2	Cytosolic Fe-S cluster assembly factor NUBP2 OS=Homo sapiens OX=9606 GN=NUBP2 PE=1 SV=1	NUBP2	0.0759386	0.0863362	0.00384816	-0.990486	-0.621641	0.113755	0.880425	0		2	stabilized
Q9Y6K8	Adenylate kinase isoenzyme 5 OS=Homo sapiens OX=9606 GN=AK5 PE=1 SV=2	AK5	0.021909	0.0523678	0.0559367	-0.990288	-0.621641	0.345141	0.288609	0		2	stabilized
Q15435	Protein phosphatase 1 regulatory subunit 7 OS=Homo sapiens OX=9606 GN=PPP1R7 PE=1 SV=1	PPP1R7	-0.0266749	0.0211927	0.0797396	-0.988298	-0.62031	0.7196	0.139578	0		2	stabilized
O94888	UBX domain-containing protein 7 OS=Homo sapiens OX=9606 GN=UBXN7 PE=1 SV=2	UBXN7	-0.0604163	0.0512833	0.0568153	-0.987854	-0.62031	0.35564	0.281686	0		2	stabilized
Q8N9N2	Activating signal cointegrator 1 complex subunit 1 OS=Homo sapiens OX=9606 GN=ASCC1 PE=1 SV=1	ASCC1	-0.048272	0.0772631	0.0222711	-0.986821	-0.619773	0.158166	0.636535	0		2	stabilized
P08133	Annexin A6 OS=Homo sapiens OX=9606 GN=ANXA6 PE=1 SV=3	ANXA6	0.0138995	0.0406411	0.065767	-0.980201	-0.615129	0.469076	0.217554	0		2	stabilized
Q8N163	Cell cycle and apoptosis regulator protein 2 OS=Homo sapiens OX=9606 GN=CCAR2 PE=1 SV=2	CCAR2	0.0356283	0.0511676	0.0561742	-0.97885	-0.614052	0.356772	0.286726	0		2	stabilized
P55209	Nucleosome assembly protein 1-like 1 OS=Homo sapiens OX=9606 GN=NAP1L1 PE=1 SV=1	NAP1L1	0.0103589	0.0193888	0.080014	-0.977396	-0.613537	0.745074	0.138297	0		2	stabilized
P17987	T-complex protein 1 subunit alpha OS=Homo sapiens OX=9606 GN=TCP1 PE=1 SV=1	TCP1	0.0468651	0.0516484	0.0554573	-0.976052	-0.61309	0.352083	0.292435	0		2	stabilized
P14406	Cytochrome c oxidase subunit 7A2, mitochondrial OS=Homo sapiens OX=9606 GN=COX7A2 PE=1 SV=1	COX7A2	-0.0236606	0.0588423	0.047674	-0.975977	-0.61309	0.286621	0.359295	0		2	stabilized
Q9Y6Y8	SEC23-interacting protein OS=Homo sapiens OX=9606 GN=SEC23IP PE=1 SV=1	SEC23IP	0.0225153	0.055183	0.0517172	-0.975369	-0.612754	0.318818	0.323445	0		2	stabilized
Q15785	Mitochondrial import receptor subunit TOM34 OS=Homo sapiens OX=9606 GN=TOMM34 PE=1 SV=2	TOMM34	0.00855999	0.00780688	0.0856692	-0.973993	-0.612466	0.914168	0.113869	0		2	stabilized
Q96S66	Chloride channel CLIC-like protein 1 OS=Homo sapiens OX=9606 GN=CLCC1 PE=1 SV=1	CLCC1	-0.0556029	0.0303188	0.0728754	-0.972219	-0.611506	0.595929	0.174671	0		2	stabilized
Q3LXA3	Triokinase/FMN cyclase OS=Homo sapiens OX=9606 GN=TKFC PE=1 SV=2	TKFC	-0.0435718	0.0634527	0.0414185	-0.969522	-0.610432	0.249285	0.419474	0		2	stabilized
Q14653	Interferon regulatory factor 3 OS=Homo sapiens OX=9606 GN=IRF3 PE=1 SV=1	IRF3	-0.0559529	0.0214914	0.0780049	-0.965817	-0.607681	0.715409	0.147888	0		2	stabilized
P39656	Dolichyl-diphosphooligosaccharide--protein glycosyltransferase 48 kDa subunit OS=Homo sapiens OX=9606 GN=DDOST PE=1 SV=4	DDOST	0.0619111	0.0212147	0.0780416	-0.964026	-0.607189	0.71929	0.147708	0		2	stabilized
Q15904	V-type proton ATPase subunit S1 OS=Homo sapiens OX=9606 GN=ATP6AP1 PE=1 SV=2	ATP6AP1	0.00288303	0.0771464	0.019121	-0.959081	-0.605341	0.158813	0.676334	0		2	stabilized
Q9H6E4	Coiled-coil domain-containing protein 134 OS=Homo sapiens OX=9606 GN=CCDC134 PE=1 SV=1	CCDC134	0.0362775	0.0816804	0.00939979	-0.954566	-0.603397	0.135133	0.804522	0		2	stabilized
Q8NCF5	NFATC2-interacting protein OS=Homo sapiens OX=9606 GN=NFATC2IP PE=1 SV=1	NFATC2IP	-0.0678323	0.0123583	0.0820274	-0.95216	-0.602687	0.846803	0.129175	0		2	stabilized
P48735	Isocitrate dehydrogenase [NADP], mitochondrial OS=Homo sapiens OX=9606 GN=IDH2 PE=1 SV=2	IDH2	-0.0100408	0.0798297	0.0129463	-0.951844	-0.602671	0.144446	0.756935	0		2	stabilized
O75175	CCR4-NOT transcription complex subunit 3 OS=Homo sapiens OX=9606 GN=CNOT3 PE=1 SV=1	CNOT3	0.0327914	0.0620218	0.041418	-0.95057	-0.602415	0.26049	0.419479	0		2	stabilized
Q96EL3	39S ribosomal protein L53, mitochondrial OS=Homo sapiens OX=9606 GN=MRPL53 PE=1 SV=1	MRPL53	-0.0282348	0.00360901	0.0857273	-0.946568	-0.600515	0.976863	0.113637	0		2	stabilized
Q6P1M0	Long-chain fatty acid transport protein 4 OS=Homo sapiens OX=9606 GN=SLC27A4 PE=1 SV=1	SLC27A4	0.0700443	0.073358	0.0240543	-0.943965	-0.59922	0.180903	0.614453	0		2	stabilized
Q969Z0	FAST kinase domain-containing protein 4 OS=Homo sapiens OX=9606 GN=TBRG4 PE=1 SV=1	TBRG4	0.00111366	0.0075558	0.0836943	-0.942492	-0.599052	0.917906	0.121981	0		2	stabilized
Q9NZ08	Endoplasmic reticulum aminopeptidase 1 OS=Homo sapiens OX=9606 GN=ERAP1 PE=1 SV=3	ERAP1	-0.00314495	0.0652579	0.0362303	-0.941648	-0.598652	0.235636	0.473608	0		2	stabilized
P63279	SUMO-conjugating enzyme UBC9 OS=Homo sapiens OX=9606 GN=UBE2I PE=1 SV=1	UBE2I	0.0428603	0.075167	0.0206026	-0.941571	-0.598652	0.170086	0.657494	0		2	stabilized
P82673	28S ribosomal protein S35, mitochondrial OS=Homo sapiens OX=9606 GN=MRPS35 PE=1 SV=1	MRPS35	-0.00262304	0.068178	0.0318417	-0.939817	-0.598297	0.214692	0.522246	0		2	stabilized
Q8WWH5	Probable tRNA pseudouridine synthase 1 OS=Homo sapiens OX=9606 GN=TRUB1 PE=1 SV=1	TRUB1	0.07866	0.030687	0.0701547	-0.93875	-0.597721	0.591147	0.190272	0		2	stabilized
O43818	U3 small nucleolar RNA-interacting protein 2 OS=Homo sapiens OX=9606 GN=RRP9 PE=1 SV=1	RRP9	0.00807759	0.0776698	0.0151435	-0.93554	-0.596636	0.155928	0.727896	0		2	stabilized
Q12965	Unconventional myosin-Ie OS=Homo sapiens OX=9606 GN=MYO1E PE=1 SV=2	MYO1E	0.0409637	0.0454093	0.0580656	-0.935526	-0.596636	0.415951	0.272029	0		2	stabilized
Q9NSD9	Phenylalanine--tRNA ligase beta subunit OS=Homo sapiens OX=9606 GN=FARSB PE=1 SV=3	FARSB	0.0743626	0.0545357	0.0485359	-0.931699	-0.594981	0.324751	0.351451	0		2	stabilized
Q16555	Dihydropyrimidinase-related protein 2 OS=Homo sapiens OX=9606 GN=DPYSL2 PE=1 SV=1	DPYSL2	0.00538872	0.0418004	0.0608132	-0.929808	-0.594585	0.455826	0.251612	0		2	stabilized
Q12797	Aspartyl/asparaginyl beta-hydroxylase OS=Homo sapiens OX=9606 GN=ASPH PE=1 SV=3	ASPH	0.0173494	0.0240208	0.0739117	-0.929768	-0.594585	0.680289	0.168988	0		2	stabilized
P07858	Cathepsin B OS=Homo sapiens OX=9606 GN=CTSB PE=1 SV=3	CTSB	-0.0158223	0.065785	0.0338723	-0.926019	-0.59237	0.231753	0.499427	0		2	stabilized
P52907	F-actin-capping protein subunit alpha-1 OS=Homo sapiens OX=9606 GN=CAPZA1 PE=1 SV=3	CAPZA1	0.00217854	0.075895	0.0168254	-0.921961	-0.58959	0.165872	0.705926	0		2	stabilized
Q9UIJ7	GTP:AMP phosphotransferase AK3, mitochondrial OS=Homo sapiens OX=9606 GN=AK3 PE=1 SV=4	AK3	0.0740179	0.06656	0.0320989	-0.919845	-0.588918	0.226125	0.519327	0		2	stabilized
P25685	DnaJ homolog subfamily B member 1 OS=Homo sapiens OX=9606 GN=DNAJB1 PE=1 SV=4	DNAJB1	0.0400657	0.0609475	0.039593	-0.91785	-0.588256	0.269129	0.438095	0		2	stabilized
Q9Y265	RuvB-like 1 OS=Homo sapiens OX=9606 GN=RUVBL1 PE=1 SV=1	RUVBL1	-0.00247871	0.0531411	0.048755	-0.9172	-0.58798	0.337776	0.349474	0		2	stabilized
Q99704	Docking protein 1 OS=Homo sapiens OX=9606 GN=DOK1 PE=1 SV=1	DOK1	0.0291473	0.0399228	0.0613033	-0.916033	-0.587319	0.477393	0.248086	0		2	stabilized
O75880	Protein SCO1 homolog, mitochondrial OS=Homo sapiens OX=9606 GN=SCO1 PE=1 SV=1	SCO1	-0.0820634	0.0308835	0.0672245	-0.901749	-0.578842	0.588604	0.208196	0		2	stabilized
Q96GD0	Pyridoxal phosphate phosphatase OS=Homo sapiens OX=9606 GN=PDXP PE=1 SV=2	PDXP	-0.00714073	0.0797685	0.0058789	-0.900054	-0.578212	0.144762	0.852494	0		2	stabilized
P49441	Inositol polyphosphate 1-phosphatase OS=Homo sapiens OX=9606 GN=INPP1 PE=1 SV=1	INPP1	0.0313716	0.055055	0.0440315	-0.889282	-0.572363	0.319986	0.393648	0		2	stabilized
P17174	Aspartate aminotransferase, cytoplasmic OS=Homo sapiens OX=9606 GN=GOT1 PE=1 SV=3	GOT1	0.00674334	0.0109755	0.0782578	-0.887143	-0.570701	0.867174	0.146653	0		2	stabilized
Q9Y6C9	Mitochondrial carrier homolog 2 OS=Homo sapiens OX=9606 GN=MTCH2 PE=1 SV=1	MTCH2	-0.0273232	0.0340103	0.0635192	-0.884013	-0.569789	0.548812	0.232573	0		2	stabilized
P23381	Tryptophan--tRNA ligase, cytoplasmic OS=Homo sapiens OX=9606 GN=WARS PE=1 SV=2	WARS	-0.0116872	0.0624842	0.033497	-0.878135	-0.566098	0.256832	0.503605	0		2	stabilized
O15084	Serine/threonine-protein phosphatase 6 regulatory ankyrin repeat subunit A OS=Homo sapiens OX=9606 GN=ANKRD28 PE=1 SV=5	ANKRD28	0.000652285	0.0349598	0.0622204	-0.876968	-0.565657	0.536997	0.24158	0		2	stabilized
P21796	Voltage-dependent anion-selective channel protein 1 OS=Homo sapiens OX=9606 GN=VDAC1 PE=1 SV=2	VDAC1	0.186563	0.0613172	0.0348805	-0.876056	-0.565212	0.266134	0.488298	0		2	stabilized
Q8WUM4	Programmed cell death 6-interacting protein OS=Homo sapiens OX=9606 GN=PDCD6IP PE=1 SV=1	PDCD6IP	0.00804749	0.0739565	0.014248	-0.873253	-0.563873	0.177269	0.739686	0		2	stabilized
Q9NW82	WD repeat-containing protein 70 OS=Homo sapiens OX=9606 GN=WDR70 PE=1 SV=1	WDR70	0.0565041	0.0523986	0.0451861	-0.86937	-0.562024	0.344846	0.382549	0		2	stabilized
Q04206	Transcription factor p65 OS=Homo sapiens OX=9606 GN=RELA PE=1 SV=2	RELA	0.020891	0.0404576	0.0570112	-0.869241	-0.562024	0.471194	0.280157	0		2	stabilized
P00167	Cytochrome b5 OS=Homo sapiens OX=9606 GN=CYB5A PE=1 SV=2	CYB5A	-0.0936428	0.0094959	0.0774054	-0.8643	-0.558243	0.88907	0.150846	0		2	stabilized
P61289	Proteasome activator complex subunit 3 OS=Homo sapiens OX=9606 GN=PSME3 PE=1 SV=1	PSME3	-0.0103546	0.0451558	0.0519337	-0.860605	-0.555894	0.418682	0.321594	0		2	stabilized
Q16666	Gamma-interferon-inducible protein 16 OS=Homo sapiens OX=9606 GN=IFI16 PE=1 SV=3	IFI16	-0.130648	0.0726694	0.0148307	-0.858929	-0.555894	0.185152	0.732008	0		2	stabilized
Q58FF8	Putative heat shock protein HSP 90-beta 2 OS=Homo sapiens OX=9606 GN=HSP90AB2P PE=1 SV=2	HSP90AB2P	-0.0594253	0.0272373	0.0664942	-0.858581	-0.555894	0.636618	0.212848	0		2	stabilized
O96000	NADH dehydrogenase [ubiquinone] 1 beta subcomplex subunit 10 OS=Homo sapiens OX=9606 GN=NDUFB10 PE=1 SV=3	NDUFB10	0.0114617	0.0588038	0.0363348	-0.857746	-0.55535	0.286948	0.472482	0		2	stabilized
Q9BRA2	Thioredoxin domain-containing protein 17 OS=Homo sapiens OX=9606 GN=TXNDC17 PE=1 SV=1	TXNDC17	-0.045733	0.0666375	0.0249082	-0.856091	-0.55535	0.225568	0.603999	0		2	stabilized
Q02127	Dihydroorotate dehydrogenase (quinone), mitochondrial OS=Homo sapiens OX=9606 GN=DHODH PE=1 SV=3	DHODH	-0.0604119	0.0409472	0.0554354	-0.855671	-0.55535	0.465557	0.29261	0		2	stabilized
Q5JSH3	WD repeat-containing protein 44 OS=Homo sapiens OX=9606 GN=WDR44 PE=1 SV=1	WDR44	-0.0517571	0.0248275	0.0677644	-0.853791	-0.553827	0.669227	0.204804	0		2	stabilized
Q13057	Bifunctional coenzyme A synthase OS=Homo sapiens OX=9606 GN=COASY PE=1 SV=4	COASY	0.0552398	0.0336013	0.0613497	-0.852748	-0.553384	0.55394	0.247754	0		2	stabilized
P35221	Catenin alpha-1 OS=Homo sapiens OX=9606 GN=CTNNA1 PE=1 SV=1	CTNNA1	-0.0225425	0.0315999	0.0627143	-0.850578	-0.552135	0.579369	0.238127	0		2	stabilized
Q8IUR0	Trafficking protein particle complex subunit 5 OS=Homo sapiens OX=9606 GN=TRAPPC5 PE=1 SV=1	TRAPPC5	0.0275376	0.0300729	0.0635262	-0.846452	-0.550123	0.599133	0.232526	0		2	stabilized
Q9HD67	Unconventional myosin-X OS=Homo sapiens OX=9606 GN=MYO10 PE=1 SV=3	MYO10	-0.0610817	0.0034172	0.0789815	-0.845415	-0.549319	0.979734	0.143164	0		2	stabilized
Q15029	116 kDa U5 small nuclear ribonucleoprotein component OS=Homo sapiens OX=9606 GN=EFTUD2 PE=1 SV=1	EFTUD2	0.00831895	0.0450089	0.0505518	-0.843278	-0.548469	0.420271	0.333531	0		2	stabilized
Q15382	GTP-binding protein Rheb OS=Homo sapiens OX=9606 GN=RHEB PE=1 SV=1	RHEB	-0.0458302	0.0623115	0.02991	-0.842372	-0.548141	0.258194	0.544441	0		2	stabilized
Q8N3U4	Cohesin subunit SA-2 OS=Homo sapiens OX=9606 GN=STAG2 PE=1 SV=3	STAG2	0.00858651	0.0763889	0.00367604	-0.833675	-0.541704	0.163058	0.882799	0		2	stabilized
Q9BXV9	EKC/KEOPS complex subunit GON7 OS=Homo sapiens OX=9606 GN=GON7 PE=1 SV=2	GON7	-0.0273267	0.074763	0.00658644	-0.82928	-0.539676	0.172458	0.842804	0		2	stabilized
Q96RN5	Mediator of RNA polymerase II transcription subunit 15 OS=Homo sapiens OX=9606 GN=MED15 PE=1 SV=2	MED15	0.0240193	0.0475494	0.0462687	-0.824431	-0.537352	0.39331	0.372319	0		2	stabilized
O95071	E3 ubiquitin-protein ligase UBR5 OS=Homo sapiens OX=9606 GN=UBR5 PE=1 SV=2	UBR5	0.0256534	0.0713215	0.0127795	-0.823877	-0.537256	0.193683	0.759154	0		2	stabilized
Q9BQL6	Fermitin family homolog 1 OS=Homo sapiens OX=9606 GN=FERMT1 PE=1 SV=1	FERMT1	-0.0245624	0.0743355	0.00660545	-0.8231	-0.536706	0.174996	0.842544	0		2	stabilized
Q9UK97	F-box only protein 9 OS=Homo sapiens OX=9606 GN=FBXO9 PE=1 SV=1	FBXO9	0.0332303	0.0590119	0.032369	-0.822319	-0.536662	0.285184	0.51627	0		2	stabilized
P10644	cAMP-dependent protein kinase type I-alpha regulatory subunit OS=Homo sapiens OX=9606 GN=PRKAR1A PE=1 SV=1	PRKAR1A	-0.0338141	0.0600691	0.030869	-0.821915	-0.536662	0.276337	0.533364	0		2	stabilized
P05198	Eukaryotic translation initiation factor 2 subunit 1 OS=Homo sapiens OX=9606 GN=EIF2S1 PE=1 SV=3	EIF2S1	0.0373253	0.0402934	0.053055	-0.820959	-0.535935	0.473093	0.312115	0		2	stabilized
Q9NVC6	Mediator of RNA polymerase II transcription subunit 17 OS=Homo sapiens OX=9606 GN=MED17 PE=1 SV=2	MED17	0.0283988	0.0181067	0.0693426	-0.818319	-0.534202	0.763354	0.195122	0		2	stabilized
P53004	Biliverdin reductase A OS=Homo sapiens OX=9606 GN=BLVRA PE=1 SV=2	BLVRA	-0.00976705	0.0719441	0.0108224	-0.818317	-0.534202	0.189707	0.785336	0		2	stabilized
Q9Y2R9	28S ribosomal protein S7, mitochondrial OS=Homo sapiens OX=9606 GN=MRPS7 PE=1 SV=2	MRPS7	0.00818792	0.0221456	0.0667685	-0.817647	-0.53376	0.706264	0.211092	0		2	stabilized
Q8TEX9	Importin-4 OS=Homo sapiens OX=9606 GN=IPO4 PE=1 SV=2	IPO4	-0.0284237	0.0735323	0.0074807	-0.817416	-0.533756	0.179839	0.83059	0		2	stabilized
P63241	Eukaryotic translation initiation factor 5A-1 OS=Homo sapiens OX=9606 GN=EIF5A PE=1 SV=2	EIF5A	0.0196782	0.00977575	0.0738519	-0.816381	-0.533174	0.884922	0.169312	0		2	stabilized
Q12996	Cleavage stimulation factor subunit 3 OS=Homo sapiens OX=9606 GN=CSTF3 PE=1 SV=1	CSTF3	-0.030862	0.0603917	0.0296956	-0.8153	-0.532529	0.273674	0.546932	0		2	stabilized
Q9Y4X5	E3 ubiquitin-protein ligase ARIH1 OS=Homo sapiens OX=9606 GN=ARIH1 PE=1 SV=2	ARIH1	0.0161845	0.0670729	0.019034	-0.81287	-0.531473	0.222455	0.677447	0		2	stabilized
Q01813	ATP-dependent 6-phosphofructokinase, platelet type OS=Homo sapiens OX=9606 GN=PFKP PE=1 SV=2	PFKP	0.0510353	0.0700996	0.013389	-0.811034	-0.530315	0.201662	0.751055	0		2	stabilized
Q9H6T3	RNA polymerase II-associated protein 3 OS=Homo sapiens OX=9606 GN=RPAP3 PE=1 SV=2	RPAP3	0.0200971	0.0409926	0.0513656	-0.808971	-0.528937	0.465036	0.326467	0		2	stabilized
Q8NG31	Kinetochore scaffold 1 OS=Homo sapiens OX=9606 GN=KNL1 PE=1 SV=3	KNL1	-0.0313648	0.0334866	0.057714	-0.807068	-0.528445	0.555382	0.274722	0		2	stabilized
O60547	GDP-mannose 4,6 dehydratase OS=Homo sapiens OX=9606 GN=GMDS PE=1 SV=1	GMDS	-0.0703219	0.0756912	0.00113736	-0.80655	-0.528445	0.167043	0.917936	0		2	stabilized
Q14139	Ubiquitin conjugation factor E4 A OS=Homo sapiens OX=9606 GN=UBE4A PE=1 SV=2	UBE4A	-0.0441115	0.0509862	0.0406805	-0.805346	-0.52822	0.358552	0.426945	0		2	stabilized
P29144	Tripeptidyl-peptidase 2 OS=Homo sapiens OX=9606 GN=TPP2 PE=1 SV=4	TPP2	0.0664886	0.033064	0.0578204	-0.80425	-0.527672	0.560713	0.273905	0		2	stabilized
Q9Y3C4	EKC/KEOPS complex subunit TPRKB OS=Homo sapiens OX=9606 GN=TPRKB PE=1 SV=1	TPRKB	0.0160653	0.0199817	0.067018	-0.802845	-0.527318	0.736669	0.209504	0		2	stabilized
Q969H8	Myeloid-derived growth factor OS=Homo sapiens OX=9606 GN=MYDGF PE=1 SV=1	MYDGF	-0.00808929	0.0266996	0.0623493	-0.800713	-0.52604	0.643835	0.240676	0		2	stabilized
P06744	Glucose-6-phosphate isomerase OS=Homo sapiens OX=9606 GN=GPI PE=1 SV=4	GPI	0.00578574	0.0725628	0.00706835	-0.800398	-0.525947	0.185817	0.836217	0		2	stabilized
P30041	Peroxiredoxin-6 OS=Homo sapiens OX=9606 GN=PRDX6 PE=1 SV=3	PRDX6	0.0235092	0.0570201	0.032377	-0.797169	-0.524714	0.302369	0.516179	0		2	stabilized
P15586	N-acetylglucosamine-6-sulfatase OS=Homo sapiens OX=9606 GN=GNS PE=1 SV=3	GNS	-0.0368712	0.0522449	0.0383193	-0.796372	-0.524359	0.346321	0.451363	0		2	stabilized
P00492	Hypoxanthine-guanine phosphoribosyltransferase OS=Homo sapiens OX=9606 GN=HPRT1 PE=1 SV=2	HPRT1	0.0285977	0.0661613	0.0180956	-0.792777	-0.521287	0.229008	0.689495	0		2	stabilized
P15531	Nucleoside diphosphate kinase A OS=Homo sapiens OX=9606 GN=NME1 PE=1 SV=1	NME1	0.0475273	0.0461328	0.044705	-0.79161	-0.521142	0.408211	0.387151	0		2	stabilized
Q9UL25	Ras-related protein Rab-21 OS=Homo sapiens OX=9606 GN=RAB21 PE=1 SV=3	RAB21	0.0786931	0.0727681	0.0052012	-0.790486	-0.520238	0.184539	0.861796	0		2	stabilized
P09132	Signal recognition particle 19 kDa protein OS=Homo sapiens OX=9606 GN=SRP19 PE=1 SV=3	SRP19	-0.0444179	0.0554489	0.0336573	-0.789743	-0.519934	0.316401	0.501818	0		2	stabilized
Q9Y3M8	StAR-related lipid transfer protein 13 OS=Homo sapiens OX=9606 GN=STARD13 PE=1 SV=2	STARD13	0.0748678	0.0315114	0.0573587	-0.783791	-0.515738	0.580506	0.27746	0		2	stabilized
Q92665	28S ribosomal protein S31, mitochondrial OS=Homo sapiens OX=9606 GN=MRPS31 PE=1 SV=3	MRPS31	-0.0145567	0.061464	0.0244813	-0.782966	-0.515351	0.264951	0.609216	0		2	stabilized
Q9UNF0	Protein kinase C and casein kinase substrate in neurons protein 2 OS=Homo sapiens OX=9606 GN=PACSIN2 PE=1 SV=2	PACSIN2	0.0111794	0.0302024	0.0581904	-0.78148	-0.514521	0.597444	0.271078	0		2	stabilized
O75449	Katanin p60 ATPase-containing subunit A1 OS=Homo sapiens OX=9606 GN=KATNA1 PE=1 SV=1	KATNA1	0.00235208	0.0554622	0.0327014	-0.780837	-0.514302	0.316281	0.51252	0		2	stabilized
P41743	Protein kinase C iota type OS=Homo sapiens OX=9606 GN=PRKCI PE=1 SV=2	PRKCI	0.101444	0.0707952	0.00764401	-0.778984	-0.513115	0.197091	0.828364	0		2	stabilized
P06753	Tropomyosin alpha-3 chain OS=Homo sapiens OX=9606 GN=TPM3 PE=1 SV=2	TPM3	-0.0225117	0.0487946	0.0405279	-0.778212	-0.512779	0.380487	0.4285	0		2	stabilized
O95239	Chromosome-associated kinesin KIF4A OS=Homo sapiens OX=9606 GN=KIF4A PE=1 SV=3	KIF4A	0.0958957	0.0641349	0.0194565	-0.776283	-0.511503	0.244063	0.67205	0		2	stabilized
P46459	Vesicle-fusing ATPase OS=Homo sapiens OX=9606 GN=NSF PE=1 SV=3	NSF	-0.00793776	0.00132931	0.0733111	-0.775643	-0.51108	0.989005	0.172265	0		2	stabilized
P39687	Acidic leucine-rich nuclear phosphoprotein 32 family member A OS=Homo sapiens OX=9606 GN=ANP32A PE=1 SV=1	ANP32A	-0.106552	0.0116897	0.0697703	-0.774675	-0.510546	0.85664	0.192557	0		2	stabilized
P32119	Peroxiredoxin-2 OS=Homo sapiens OX=9606 GN=PRDX2 PE=1 SV=5	PRDX2	0.0457542	0.0198923	0.0646825	-0.77185	-0.508981	0.737934	0.224711	0		2	stabilized
O75165	DnaJ homolog subfamily C member 13 OS=Homo sapiens OX=9606 GN=DNAJC13 PE=1 SV=5	DNAJC13	0.00983233	0.0618203	0.0226189	-0.771745	-0.508981	0.262096	0.632202	0		2	stabilized
P04637	Cellular tumor antigen p53 OS=Homo sapiens OX=9606 GN=TP53 PE=1 SV=4	TP53	-0.0217298	0.0524144	0.0356041	-0.771593	-0.508981	0.344694	0.480393	0		2	stabilized
Q5VZE5	N-alpha-acetyltransferase 35, NatC auxiliary subunit OS=Homo sapiens OX=9606 GN=NAA35 PE=1 SV=1	NAA35	-0.0174316	0.0583767	0.0274851	-0.769474	-0.507295	0.290591	0.572949	0		2	stabilized
O43301	Heat shock 70 kDa protein 12A OS=Homo sapiens OX=9606 GN=HSPA12A PE=1 SV=2	HSPA12A	0.00505982	0.057323	0.0289016	-0.768884	-0.507137	0.299712	0.556209	0		2	stabilized
P98170	E3 ubiquitin-protein ligase XIAP OS=Homo sapiens OX=9606 GN=XIAP PE=1 SV=2	XIAP	0.0263963	0.0204076	0.0640231	-0.767666	-0.506261	0.73065	0.229144	0		2	stabilized
Q8NE86	Calcium uniporter protein, mitochondrial OS=Homo sapiens OX=9606 GN=MCU PE=1 SV=1	MCU	0.0309631	0.0433396	0.0452807	-0.766913	-0.505986	0.438561	0.381648	0		2	stabilized
P13995	Bifunctional methylenetetrahydrofolate dehydrogenase/cyclohydrolase, mitochondrial OS=Homo sapiens OX=9606 GN=MTHFD2 PE=1 SV=2	MTHFD2	0.0285032	0.0562657	0.0298828	-0.764588	-0.505423	0.309055	0.544756	0		2	stabilized
O95801	Tetratricopeptide repeat protein 4 OS=Homo sapiens OX=9606 GN=TTC4 PE=1 SV=3	TTC4	-0.00862332	0.026854	0.0592195	-0.763293	-0.504793	0.641759	0.263321	0		2	stabilized
Q9NQX7	Integral membrane protein 2C OS=Homo sapiens OX=9606 GN=ITM2C PE=1 SV=1	ITM2C	-0.113814	0.0561387	0.0297592	-0.761877	-0.504212	0.310189	0.546192	0		2	stabilized
P26022	Pentraxin-related protein PTX3 OS=Homo sapiens OX=9606 GN=PTX3 PE=1 SV=3	PTX3	-0.0142961	0.0320884	0.0550035	-0.761271	-0.50382	0.573113	0.296087	0		2	stabilized
P33991	DNA replication licensing factor MCM4 OS=Homo sapiens OX=9606 GN=MCM4 PE=1 SV=5	MCM4	-0.0157666	0.046068	0.0418559	-0.760894	-0.503656	0.408901	0.415083	0		2	stabilized
Q9HC38	Glyoxalase domain-containing protein 4 OS=Homo sapiens OX=9606 GN=GLOD4 PE=1 SV=1	GLOD4	0.00203729	0.02289	0.0616391	-0.758453	-0.502282	0.69591	0.245689	0		2	stabilized
Q9BRG1	Vacuolar protein-sorting-associated protein 25 OS=Homo sapiens OX=9606 GN=VPS25 PE=1 SV=1	VPS25	-0.0179357	0.0312096	0.0553858	-0.75741	-0.501878	0.584391	0.293008	0		2	stabilized
P49770	Translation initiation factor eIF-2B subunit beta OS=Homo sapiens OX=9606 GN=EIF2B2 PE=1 SV=3	EIF2B2	0.091311	0.0474743	0.0393882	-0.75148	-0.498386	0.394091	0.440212	0		2	stabilized
P55263	Adenosine kinase OS=Homo sapiens OX=9606 GN=ADK PE=1 SV=2	ADK	-0.113208	0.0563307	0.0282887	-0.750922	-0.498357	0.308474	0.563424	0		2	stabilized
O75044	SLIT-ROBO Rho GTPase-activating protein 2 OS=Homo sapiens OX=9606 GN=SRGAP2 PE=1 SV=3	SRGAP2	-0.0227644	0.0482241	0.0383292	-0.749382	-0.497663	0.38633	0.451259	0		2	stabilized
P08579	U2 small nuclear ribonucleoprotein B'' OS=Homo sapiens OX=9606 GN=SNRPB2 PE=1 SV=1	SNRPB2	-0.0383367	0.0465742	0.0401028	-0.748548	-0.49725	0.403532	0.432847	0		2	stabilized
Q15046	Lysine--tRNA ligase OS=Homo sapiens OX=9606 GN=KARS1 PE=1 SV=3	KARS1	0.044237	0.0301729	0.0553559	-0.747294	-0.496418	0.597828	0.293248	0		2	stabilized
Q3ZCQ8	Mitochondrial import inner membrane translocase subunit TIM50 OS=Homo sapiens OX=9606 GN=TIMM50 PE=1 SV=2	TIMM50	-0.0141023	0.017982	0.0638976	-0.746297	-0.49575	0.765139	0.229995	0		2	stabilized
Q9NPA0	ER membrane protein complex subunit 7 OS=Homo sapiens OX=9606 GN=EMC7 PE=1 SV=1	EMC7	0.0564627	0.0669893	0.0105257	-0.746205	-0.49575	0.22305	0.789326	0		2	stabilized
Q6NUM9	All-trans-retinol 13,14-reductase OS=Homo sapiens OX=9606 GN=RETSAT PE=1 SV=2	RETSAT	-0.0545787	0.0303583	0.0550369	-0.745269	-0.495024	0.595415	0.295817	0		2	stabilized
Q9NTZ6	RNA-binding protein 12 OS=Homo sapiens OX=9606 GN=RBM12 PE=1 SV=1	RBM12	-0.011446	0.0362578	0.0499293	-0.743837	-0.494028	0.521055	0.339001	0		2	stabilized
P30084	Enoyl-CoA hydratase, mitochondrial OS=Homo sapiens OX=9606 GN=ECHS1 PE=1 SV=4	ECHS1	0.0487404	0.0413913	0.0450673	-0.743643	-0.494028	0.460477	0.383682	0		2	stabilized
O75410	Transforming acidic coiled-coil-containing protein 1 OS=Homo sapiens OX=9606 GN=TACC1 PE=1 SV=2	TACC1	0.00702024	0.0587757	0.023708	-0.741558	-0.492153	0.287186	0.618715	0		2	stabilized
P30048	Thioredoxin-dependent peroxide reductase, mitochondrial OS=Homo sapiens OX=9606 GN=PRDX3 PE=1 SV=3	PRDX3	0.118264	0.0543139	0.0296117	-0.738037	-0.490253	0.3268	0.547909	0		2	stabilized
P04181	Ornithine aminotransferase, mitochondrial OS=Homo sapiens OX=9606 GN=OAT PE=1 SV=1	OAT	0.0193654	0.0592609	0.0225447	-0.737883	-0.490253	0.283083	0.633125	0		2	stabilized
Q9H4L7	SWI/SNF-related matrix-associated actin-dependent regulator of chromatin subfamily A containing DEAD/H box 1 OS=Homo sapiens OX=9606 GN=SMARCAD1 PE=1 SV=2	SMARCAD1	0.0538477	0.0579471	0.0238635	-0.732353	-0.487315	0.294287	0.6168	0		2	stabilized
P50395	Rab GDP dissociation inhibitor beta OS=Homo sapiens OX=9606 GN=GDI2 PE=1 SV=2	GDI2	-0.00822636	0.059579	0.0213665	-0.732092	-0.487315	0.280414	0.647863	0		2	stabilized
Q6UWE0	E3 ubiquitin-protein ligase LRSAM1 OS=Homo sapiens OX=9606 GN=LRSAM1 PE=1 SV=1	LRSAM1	0.0801781	0.023925	0.0587696	-0.731955	-0.487315	0.681606	0.266693	0		2	stabilized
O43156	TELO2-interacting protein 1 homolog OS=Homo sapiens OX=9606 GN=TTI1 PE=1 SV=3	TTI1	-0.0645905	0.0581108	0.0235497	-0.731744	-0.487315	0.292875	0.620667	0		2	stabilized
Q5SRE5	Nucleoporin NUP188 homolog OS=Homo sapiens OX=9606 GN=NUP188 PE=1 SV=1	NUP188	-0.03927	0.0649251	0.0123248	-0.731276	-0.487315	0.238112	0.765214	0		2	stabilized
Q9P2B2	Prostaglandin F2 receptor negative regulator OS=Homo sapiens OX=9606 GN=PTGFRN PE=1 SV=2	PTGFRN	0.0121021	0.0613575	0.0184381	-0.731201	-0.487315	0.265809	0.685088	0		2	stabilized
Q12904	Aminoacyl tRNA synthase complex-interacting multifunctional protein 1 OS=Homo sapiens OX=9606 GN=AIMP1 PE=1 SV=2	AIMP1	0.0546604	0.0146796	0.0647254	-0.730974	-0.487315	0.81284	0.224425	0		2	stabilized
Q96P16	Regulation of nuclear pre-mRNA domain-containing protein 1A OS=Homo sapiens OX=9606 GN=RPRD1A PE=1 SV=1	RPRD1A	0.0434697	0.0472416	0.0375992	-0.730885	-0.487315	0.39652	0.458963	0		2	stabilized
P12956	X-ray repair cross-complementing protein 6 OS=Homo sapiens OX=9606 GN=XRCC6 PE=1 SV=2	XRCC6	0.0921241	0.0132053	0.0655469	-0.730361	-0.487205	0.834373	0.218993	0		2	stabilized
P27695	DNA-(apurinic or apyrimidinic site) lyase OS=Homo sapiens OX=9606 GN=APEX1 PE=1 SV=2	APEX1	0.177096	0.0389232	0.0459486	-0.727187	-0.485064	0.489099	0.375327	0		2	stabilized
Q96P48	Arf-GAP with Rho-GAP domain, ANK repeat and PH domain-containing protein 1 OS=Homo sapiens OX=9606 GN=ARAP1 PE=1 SV=3	ARAP1	-0.042752	0.0449068	0.0396688	-0.725502	-0.483998	0.421376	0.437311	0		2	stabilized
Q96EK6	Glucosamine 6-phosphate N-acetyltransferase OS=Homo sapiens OX=9606 GN=GNPNAT1 PE=1 SV=1	GNPNAT1	-0.0285092	0.0271888	0.0556445	-0.723276	-0.482506	0.637268	0.290937	0		2	stabilized
P12081	Histidine--tRNA ligase, cytoplasmic OS=Homo sapiens OX=9606 GN=HARS PE=1 SV=2	HARS	0.066355	0.0211973	0.059828	-0.721681	-0.482027	0.719535	0.258807	0		2	stabilized
P00813	Adenosine deaminase OS=Homo sapiens OX=9606 GN=ADA PE=1 SV=3	ADA	-0.0325143	0.0430032	0.0412801	-0.721135	-0.481686	0.442302	0.42087	0		2	stabilized
O14744	Protein arginine N-methyltransferase 5 OS=Homo sapiens OX=9606 GN=PRMT5 PE=1 SV=4	PRMT5	0.0762449	0.0453323	0.0387324	-0.72076	-0.481516	0.416779	0.447034	0		2	stabilized
Q9Y606	tRNA pseudouridine synthase A OS=Homo sapiens OX=9606 GN=PUS1 PE=1 SV=3	PUS1	0.0713038	0.00929906	0.0666804	-0.716503	-0.479099	0.89199	0.211655	0		2	stabilized
Q7Z2T5	TRMT1-like protein OS=Homo sapiens OX=9606 GN=TRMT1L PE=1 SV=2	TRMT1L	-0.0788356	0.0441207	0.0392586	-0.712676	-0.477308	0.429946	0.441555	0		2	stabilized
P29762	Cellular retinoic acid-binding protein 1 OS=Homo sapiens OX=9606 GN=CRABP1 PE=1 SV=2	CRABP1	0.00141938	0.0656229	0.00760192	-0.706483	-0.47373	0.232942	0.828938	0		2	stabilized
Q9ULX6	A-kinase anchor protein 8-like OS=Homo sapiens OX=9606 GN=AKAP8L PE=1 SV=4	AKAP8L	-0.000308267	0.015705	0.0621413	-0.706088	-0.47373	0.797945	0.242137	0		2	stabilized
O94826	Mitochondrial import receptor subunit TOM70 OS=Homo sapiens OX=9606 GN=TOMM70 PE=1 SV=1	TOMM70	0.00364618	0.0476818	0.0344302	-0.704897	-0.47372	0.391934	0.493252	0		2	stabilized
P49591	Serine--tRNA ligase, cytoplasmic OS=Homo sapiens OX=9606 GN=SARS PE=1 SV=3	SARS	-0.00796722	0.0227838	0.0571988	-0.70313	-0.473011	0.697383	0.2787	0		2	stabilized
Q8TEA7	TBC domain-containing protein kinase-like protein OS=Homo sapiens OX=9606 GN=TBCK PE=1 SV=4	TBCK	0.0177807	0.0400089	0.0425999	-0.702898	-0.472981	0.476392	0.407676	0		2	stabilized
Q9BY50	Signal peptidase complex catalytic subunit SEC11C OS=Homo sapiens OX=9606 GN=SEC11C PE=1 SV=3	SEC11C	0.119479	0.0504868	0.0304707	-0.700069	-0.471554	0.363479	0.53795	0		2	stabilized
Q9BWH6	RNA polymerase II-associated protein 1 OS=Homo sapiens OX=9606 GN=RPAP1 PE=1 SV=3	RPAP1	0.00930614	0.0450277	0.0365271	-0.695439	-0.469102	0.420067	0.470412	0		2	stabilized
Q15024	Exosome complex component RRP42 OS=Homo sapiens OX=9606 GN=EXOSC7 PE=1 SV=3	EXOSC7	-0.0226247	0.0375102	0.0443106	-0.695087	-0.468964	0.505906	0.390947	0		2	stabilized
Q9BYT8	Neurolysin, mitochondrial OS=Homo sapiens OX=9606 GN=NLN PE=1 SV=1	NLN	-0.0136997	0.0599322	0.0161251	-0.694305	-0.468827	0.277471	0.715045	0		2	stabilized
P53634	Dipeptidyl peptidase 1 OS=Homo sapiens OX=9606 GN=CTSC PE=1 SV=2	CTSC	0.00595652	0.027156	0.0530799	-0.692954	-0.468382	0.637707	0.311907	0		2	stabilized
P05141	ADP/ATP translocase 2 OS=Homo sapiens OX=9606 GN=SLC25A5 PE=1 SV=7	SLC25A5	0.0338539	0.059662	0.0161654	-0.691136	-0.467393	0.279721	0.714519	0		2	stabilized
Q8WUH6	Transmembrane protein 263 OS=Homo sapiens OX=9606 GN=TMEM263 PE=1 SV=1	TMEM263	-0.0351672	0.0599072	0.0156954	-0.690626	-0.467278	0.277679	0.720662	0		2	stabilized
Q9UGP8	Translocation protein SEC63 homolog OS=Homo sapiens OX=9606 GN=SEC63 PE=1 SV=2	SEC63	0.00529288	0.0587883	0.0169361	-0.685993	-0.464026	0.287079	0.704489	0		2	stabilized
Q13085	Acetyl-CoA carboxylase 1 OS=Homo sapiens OX=9606 GN=ACACA PE=1 SV=2	ACACA	-0.0629783	0.0349189	0.0458347	-0.685372	-0.463674	0.537503	0.3764	0		2	stabilized
Q7Z2Z2	Elongation factor-like GTPase 1 OS=Homo sapiens OX=9606 GN=EFL1 PE=1 SV=2	EFL1	-0.0176763	0.0355642	0.0450854	-0.683724	-0.462702	0.529543	0.38351	0		2	stabilized
Q9NPJ6	Mediator of RNA polymerase II transcription subunit 4 OS=Homo sapiens OX=9606 GN=MED4 PE=1 SV=1	MED4	-0.0604743	0.0396178	0.0410607	-0.68282	-0.46223	0.480949	0.423087	0		2	stabilized
Q49AR2	UPF0489 protein C5orf22 OS=Homo sapiens OX=9606 GN=C5orf22 PE=1 SV=2	C5orf22	0.0232247	0.0242139	0.0543104	-0.681202	-0.461592	0.677634	0.301724	0		2	stabilized
Q9BTE3	Mini-chromosome maintenance complex-binding protein OS=Homo sapiens OX=9606 GN=MCMBP PE=1 SV=2	MCMBP	0.0683855	0.0439918	0.0362158	-0.680957	-0.461543	0.431361	0.473765	0		2	stabilized
Q14677	Clathrin interactor 1 OS=Homo sapiens OX=9606 GN=CLINT1 PE=1 SV=1	CLINT1	0.00152233	0.0379057	0.0425194	-0.680239	-0.461216	0.501172	0.408474	0		2	stabilized
Q9BVG4	Protein PBDC1 OS=Homo sapiens OX=9606 GN=PBDC1 PE=1 SV=1	PBDC1	-0.0196155	0.0645001	0.00579192	-0.678653	-0.460598	0.2413	0.853687	0		2	stabilized
Q9UPN7	Serine/threonine-protein phosphatase 6 regulatory subunit 1 OS=Homo sapiens OX=9606 GN=PPP6R1 PE=1 SV=5	PPP6R1	0.0917997	0.015179	0.060225	-0.678146	-0.460296	0.805577	0.255891	0		2	stabilized
Q06210	Glutamine--fructose-6-phosphate aminotransferase [isomerizing] 1 OS=Homo sapiens OX=9606 GN=GFPT1 PE=1 SV=3	GFPT1	-0.00806711	0.0617822	0.0104977	-0.675828	-0.459147	0.2624	0.789703	0		2	stabilized
P49368	T-complex protein 1 subunit gamma OS=Homo sapiens OX=9606 GN=CCT3 PE=1 SV=4	CCT3	0.0159302	0.0469398	0.0317721	-0.671242	-0.456696	0.399682	0.523037	0		2	stabilized
Q9NRV9	Heme-binding protein 1 OS=Homo sapiens OX=9606 GN=HEBP1 PE=1 SV=1	HEBP1	-0.0954644	0.0289973	0.0496517	-0.670719	-0.456366	0.613233	0.341458	0		2	stabilized
Q92890	Ubiquitin recognition factor in ER-associated degradation protein 1 OS=Homo sapiens OX=9606 GN=UFD1 PE=1 SV=3	UFD1	0.0374201	0.0272488	0.0510038	-0.669997	-0.456031	0.636464	0.329596	0		2	stabilized
O00469	Procollagen-lysine,2-oxoglutarate 5-dioxygenase 2 OS=Homo sapiens OX=9606 GN=PLOD2 PE=1 SV=2	PLOD2	-0.0136588	0.0336198	0.0455285	-0.669298	-0.455911	0.553708	0.379295	0		2	stabilized
Q8IWS0	PHD finger protein 6 OS=Homo sapiens OX=9606 GN=PHF6 PE=1 SV=1	PHF6	0.112783	0.0523554	0.0244684	-0.668658	-0.455465	0.345259	0.609373	0		2	stabilized
P78371	T-complex protein 1 subunit beta OS=Homo sapiens OX=9606 GN=CCT2 PE=1 SV=4	CCT2	0.102017	0.0506412	0.0267466	-0.668222	-0.455415	0.361951	0.58177	0		2	stabilized
P41250	Glycine--tRNA ligase OS=Homo sapiens OX=9606 GN=GARS1 PE=1 SV=3	GARS1	-0.0112401	0.0624129	0.0081568	-0.667289	-0.454867	0.257393	0.821384	0		2	stabilized
P26368	Splicing factor U2AF 65 kDa subunit OS=Homo sapiens OX=9606 GN=U2AF2 PE=1 SV=4	U2AF2	0.0504059	0.00607418	0.0644549	-0.665274	-0.454007	0.940003	0.226235	0		2	stabilized
Q8IXQ4	GPALPP motifs-containing protein 1 OS=Homo sapiens OX=9606 GN=GPALPP1 PE=1 SV=1	GPALPP1	-0.0161934	0.0553537	0.0194567	-0.663083	-0.452623	0.317266	0.672047	0		2	stabilized
P22061	Protein-L-isoaspartate(D-aspartate) O-methyltransferase OS=Homo sapiens OX=9606 GN=PCMT1 PE=1 SV=4	PCMT1	-0.143136	0.0476407	0.0299749	-0.662555	-0.452623	0.392361	0.543687	0		2	stabilized
Q9Y3C0	WASH complex subunit 3 OS=Homo sapiens OX=9606 GN=WASHC3 PE=1 SV=1	WASHC3	-0.0282367	0.0270756	0.0501106	-0.658336	-0.450422	0.638785	0.337401	0		2	stabilized
P07602	Prosaposin OS=Homo sapiens OX=9606 GN=PSAP PE=1 SV=2	PSAP	0.0187361	0.0265889	0.0500588	-0.653377	-0.447268	0.645326	0.337858	0		2	stabilized
P61201	COP9 signalosome complex subunit 2 OS=Homo sapiens OX=9606 GN=COPS2 PE=1 SV=1	COPS2	0.0175797	0.0268956	0.0497359	-0.652503	-0.446816	0.641201	0.340712	0		2	stabilized
Q9UBB6	Neurochondrin OS=Homo sapiens OX=9606 GN=NCDN PE=1 SV=1	NCDN	0.0359098	0.047829	0.0285575	-0.651797	-0.446488	0.390408	0.560255	0		2	stabilized
Q92917	G-patch domain and KOW motifs-containing protein OS=Homo sapiens OX=9606 GN=GPKOW PE=1 SV=2	GPKOW	0.0586589	0.0330071	0.0444151	-0.651411	-0.44644	0.561433	0.389939	0		2	stabilized
P04083	Annexin A1 OS=Homo sapiens OX=9606 GN=ANXA1 PE=1 SV=2	ANXA1	0.0266261	0.018711	0.055596	-0.650108	-0.445855	0.75472	0.291324	0		2	stabilized
Q9Y3B7	39S ribosomal protein L11, mitochondrial OS=Homo sapiens OX=9606 GN=MRPL11 PE=1 SV=1	MRPL11	-0.03661	0.0248152	0.0511102	-0.64954	-0.445514	0.669396	0.328673	0		2	stabilized
A6NDG6	Glycerol-3-phosphate phosphatase OS=Homo sapiens OX=9606 GN=PGP PE=1 SV=1	PGP	0.0946899	0.0380283	0.0392672	-0.648039	-0.44458	0.499709	0.441467	0		2	stabilized
P07339	Cathepsin D OS=Homo sapiens OX=9606 GN=CTSD PE=1 SV=1	CTSD	0.0358013	0.0597161	0.0103242	-0.647654	-0.444384	0.279269	0.792041	0		2	stabilized
P04424	Argininosuccinate lyase OS=Homo sapiens OX=9606 GN=ASL PE=1 SV=4	ASL	-0.0553956	0.0254632	0.0502539	-0.645553	-0.443057	0.66056	0.336141	0		2	stabilized
Q9H6R7	WD repeat and coiled-coil-containing protein OS=Homo sapiens OX=9606 GN=WDCP PE=1 SV=1	WDCP	0.0138293	0.0170186	0.0561432	-0.643041	-0.441089	0.778972	0.286972	0		2	stabilized
Q9GZY8	Mitochondrial fission factor OS=Homo sapiens OX=9606 GN=MFF PE=1 SV=1	MFF	0.0473548	0.0220251	0.0526256	-0.642846	-0.441082	0.707946	0.315723	0		2	stabilized
O60762	Dolichol-phosphate mannosyltransferase subunit 1 OS=Homo sapiens OX=9606 GN=DPM1 PE=1 SV=1	DPM1	0.00773516	0.0148862	0.0574222	-0.6417	-0.440505	0.809834	0.27697	0		2	stabilized
O00116	Alkyldihydroxyacetonephosphate synthase, peroxisomal OS=Homo sapiens OX=9606 GN=AGPS PE=1 SV=1	AGPS	-0.0192315	0.0568477	0.0140239	-0.638799	-0.438867	0.303889	0.742647	0		2	stabilized
O43633	Charged multivesicular body protein 2a OS=Homo sapiens OX=9606 GN=CHMP2A PE=1 SV=1	CHMP2A	-0.0249381	0.0353711	0.0409396	-0.638233	-0.438719	0.531919	0.424314	0		2	stabilized
P20618	Proteasome subunit beta type-1 OS=Homo sapiens OX=9606 GN=PSMB1 PE=1 SV=2	PSMB1	-0.0427006	0.0435099	0.0321663	-0.636802	-0.43841	0.436675	0.518563	0		2	stabilized
Q9BRT9	DNA replication complex GINS protein SLD5 OS=Homo sapiens OX=9606 GN=GINS4 PE=1 SV=1	GINS4	-0.0420591	0.0405139	0.0353248	-0.63482	-0.436987	0.470544	0.483436	0		2	stabilized
P33981	Dual specificity protein kinase TTK OS=Homo sapiens OX=9606 GN=TTK PE=1 SV=2	TTK	-0.0826081	0.0442583	0.0309903	-0.634023	-0.436562	0.428439	0.53197	0		2	stabilized
Q96EK5	KIF-binding protein OS=Homo sapiens OX=9606 GN=KIFBP PE=1 SV=1	KIFBP	-0.0020471	0.0632494	0.00144566	-0.632794	-0.436263	0.250856	0.913659	0		2	stabilized
Q16698	2,4-dienoyl-CoA reductase, mitochondrial OS=Homo sapiens OX=9606 GN=DECR1 PE=1 SV=1	DECR1	-0.105827	0.0409265	0.0343367	-0.629634	-0.434401	0.465795	0.494284	0		2	stabilized
Q86SJ2	Amphoterin-induced protein 2 OS=Homo sapiens OX=9606 GN=AMIGO2 PE=1 SV=1	AMIGO2	-0.0774554	0.0304816	0.0444842	-0.62804	-0.433142	0.593813	0.389273	0		2	stabilized
Q16576	Histone-binding protein RBBP7 OS=Homo sapiens OX=9606 GN=RBBP7 PE=1 SV=1	RBBP7	0.0634454	0.024603	0.0491544	-0.625655	-0.432517	0.672299	0.345889	0		2	stabilized
P30837	Aldehyde dehydrogenase X, mitochondrial OS=Homo sapiens OX=9606 GN=ALDH1B1 PE=1 SV=3	ALDH1B1	0.0199007	0.0115528	0.058129	-0.625151	-0.432319	0.858657	0.271545	0		2	stabilized
Q05639	Elongation factor 1-alpha 2 OS=Homo sapiens OX=9606 GN=EEF1A2 PE=1 SV=1	EEF1A2	0.00928595	0.0506635	0.0214616	-0.623035	-0.431124	0.361731	0.646668	0		2	stabilized
O14662	Syntaxin-16 OS=Homo sapiens OX=9606 GN=STX16 PE=1 SV=3	STX16	0.196063	0.0425647	0.0317409	-0.622549	-0.430821	0.447205	0.523392	0		2	stabilized
Q96TA2	ATP-dependent zinc metalloprotease YME1L1 OS=Homo sapiens OX=9606 GN=YME1L1 PE=1 SV=2	YME1L1	0.0399891	0.00699911	0.0605001	-0.621772	-0.430411	0.926203	0.253884	0		2	stabilized
Q13418	Integrin-linked protein kinase OS=Homo sapiens OX=9606 GN=ILK PE=1 SV=2	ILK	0.15247	0.0431664	0.0309019	-0.621256	-0.430262	0.440485	0.532985	0		2	stabilized
P52298	Nuclear cap-binding protein subunit 2 OS=Homo sapiens OX=9606 GN=NCBP2 PE=1 SV=1	NCBP2	-0.0242424	0.0366093	0.037961	-0.620448	-0.429821	0.51678	0.455136	0		2	stabilized
P23229	Integrin alpha-6 OS=Homo sapiens OX=9606 GN=ITGA6 PE=1 SV=5	ITGA6	-0.0172037	0.0410277	0.0332006	-0.619847	-0.429586	0.464634	0.506916	0		2	stabilized
P49327	Fatty acid synthase OS=Homo sapiens OX=9606 GN=FASN PE=1 SV=3	FASN	0.0303993	0.0383121	0.0360781	-0.6192	-0.429305	0.496331	0.475253	0		2	stabilized
P00533	Epidermal growth factor receptor OS=Homo sapiens OX=9606 GN=EGFR PE=1 SV=2	EGFR	0.00622558	0.054407	0.0144878	-0.612116	-0.425502	0.325939	0.736524	0		2	stabilized
P61011	Signal recognition particle 54 kDa protein OS=Homo sapiens OX=9606 GN=SRP54 PE=1 SV=1	SRP54	0.0246856	0.0538198	0.0153008	-0.611227	-0.425065	0.331396	0.725831	0		2	stabilized
P10620	Microsomal glutathione S-transferase 1 OS=Homo sapiens OX=9606 GN=MGST1 PE=1 SV=1	MGST1	-0.0387743	0.0561141	0.0114662	-0.610401	-0.424512	0.310409	0.776694	0		2	stabilized
P41223	Protein BUD31 homolog OS=Homo sapiens OX=9606 GN=BUD31 PE=1 SV=2	BUD31	0.0152858	0.0580131	0.00804984	-0.609514	-0.423988	0.293718	0.822839	0		2	stabilized
Q96BW5	Phosphotriesterase-related protein OS=Homo sapiens OX=9606 GN=PTER PE=1 SV=1	PTER	0.0221019	0.0407008	0.0324566	-0.609337	-0.423988	0.468389	0.51528	0		2	stabilized
P05091	Aldehyde dehydrogenase, mitochondrial OS=Homo sapiens OX=9606 GN=ALDH2 PE=1 SV=2	ALDH2	-0.0336016	0.0532659	0.0157575	-0.60806	-0.423051	0.336597	0.719848	0		2	stabilized
Q92888	Rho guanine nucleotide exchange factor 1 OS=Homo sapiens OX=9606 GN=ARHGEF1 PE=1 SV=2	ARHGEF1	0.0117242	0.0545249	0.0137655	-0.608034	-0.423051	0.324851	0.746066	0		2	stabilized
O00217	NADH dehydrogenase [ubiquinone] iron-sulfur protein 8, mitochondrial OS=Homo sapiens OX=9606 GN=NDUFS8 PE=1 SV=1	NDUFS8	-0.0626802	0.0277782	0.0448079	-0.606486	-0.422406	0.629391	0.386163	0		2	stabilized
Q9H2P9	Diphthine methyl ester synthase OS=Homo sapiens OX=9606 GN=DPH5 PE=1 SV=2	DPH5	-0.0411907	0.0374129	0.0355639	-0.604956	-0.421598	0.507076	0.48083	0		2	stabilized
Q06124	Tyrosine-protein phosphatase non-receptor type 11 OS=Homo sapiens OX=9606 GN=PTPN11 PE=1 SV=2	PTPN11	-0.03297	0.0514301	0.0181019	-0.604606	-0.421428	0.354207	0.689413	0		2	stabilized
Q86TX2	Acyl-coenzyme A thioesterase 1 OS=Homo sapiens OX=9606 GN=ACOT1 PE=1 SV=1	ACOT1	0.0261074	0.0556688	0.0111233	-0.602335	-0.42006	0.314412	0.781294	0		2	stabilized
P50281	Matrix metalloproteinase-14 OS=Homo sapiens OX=9606 GN=MMP14 PE=1 SV=3	MMP14	0.00414409	0.0334805	0.0392274	-0.602125	-0.42006	0.555459	0.441879	0		2	stabilized
Q9P000	COMM domain-containing protein 9 OS=Homo sapiens OX=9606 GN=COMMD9 PE=1 SV=2	COMMD9	0.00789936	0.0489847	0.0212886	-0.601988	-0.42006	0.378553	0.648843	0		2	stabilized
Q96EB6	NAD-dependent protein deacetylase sirtuin-1 OS=Homo sapiens OX=9606 GN=SIRT1 PE=1 SV=2	SIRT1	-0.00163171	0.0410789	0.0312432	-0.601979	-0.42006	0.464047	0.529072	0		2	stabilized
Q9Y320	Thioredoxin-related transmembrane protein 2 OS=Homo sapiens OX=9606 GN=TMX2 PE=1 SV=1	TMX2	-0.100754	0.0603079	0.00250555	-0.601028	-0.419468	0.274364	0.898975	0		2	stabilized
Q13555	Calcium/calmodulin-dependent protein kinase type II subunit gamma OS=Homo sapiens OX=9606 GN=CAMK2G PE=1 SV=4	CAMK2G	-0.00319618	0.00291011	0.0609154	-0.599568	-0.418546	0.987326	0.250874	0		2	stabilized
P33993	DNA replication licensing factor MCM7 OS=Homo sapiens OX=9606 GN=MCM7 PE=1 SV=4	MCM7	-0.0115124	0.0291055	0.0426322	-0.595629	-0.415681	0.611809	0.407356	0		2	stabilized
P50552	Vasodilator-stimulated phosphoprotein OS=Homo sapiens OX=9606 GN=VASP PE=1 SV=3	VASP	0.00910454	0.0071429	0.0582113	-0.594699	-0.415528	0.924059	0.270919	0		2	stabilized
Q9BVC4	Target of rapamycin complex subunit LST8 OS=Homo sapiens OX=9606 GN=MLST8 PE=1 SV=1	MLST8	0.0775066	0.0366467	0.0353041	-0.594645	-0.415528	0.516326	0.483661	0		2	stabilized
P11413	Glucose-6-phosphate 1-dehydrogenase OS=Homo sapiens OX=9606 GN=G6PD PE=1 SV=4	G6PD	-0.0229387	0.0590796	0.0037704	-0.593598	-0.415238	0.284612	0.881497	0		2	stabilized
Q86VS8	Protein Hook homolog 3 OS=Homo sapiens OX=9606 GN=HOOK3 PE=1 SV=2	HOOK3	0.00553807	0.0593855	0.0028692	-0.591518	-0.413532	0.282035	0.893945	0		2	stabilized
O00170	AH receptor-interacting protein OS=Homo sapiens OX=9606 GN=AIP PE=1 SV=2	AIP	0.0327046	0.0229429	0.0473348	-0.591151	-0.413343	0.695176	0.362412	0		2	stabilized
Q8WUH1	Protein Churchill OS=Homo sapiens OX=9606 GN=CHURC1 PE=1 SV=2	CHURC1	0.0928875	0.0318935	0.0395741	-0.590314	-0.413039	0.575605	0.438289	0		2	stabilized
P25205	DNA replication licensing factor MCM3 OS=Homo sapiens OX=9606 GN=MCM3 PE=1 SV=3	MCM3	0.0136651	0.0250836	0.04541	-0.588825	-0.412084	0.665731	0.38042	0		2	stabilized
P23786	Carnitine O-palmitoyltransferase 2, mitochondrial OS=Homo sapiens OX=9606 GN=CPT2 PE=1 SV=2	CPT2	0.0729437	0.0278488	0.0427653	-0.585487	-0.409809	0.62845	0.40604	0		2	stabilized
Q00403	Transcription initiation factor IIB OS=Homo sapiens OX=9606 GN=GTF2B PE=1 SV=1	GTF2B	0.0994807	0.0364747	0.0343403	-0.583587	-0.408086	0.518414	0.494244	0		2	stabilized
Q15691	Microtubule-associated protein RP/EB family member 1 OS=Homo sapiens OX=9606 GN=MAPRE1 PE=1 SV=3	MAPRE1	-0.0444597	0.024654	0.0451705	-0.582478	-0.407751	0.671601	0.382698	0		2	stabilized
O60749	Sorting nexin-2 OS=Homo sapiens OX=9606 GN=SNX2 PE=1 SV=2	SNX2	-0.0132033	0.0551633	0.00892707	-0.580115	-0.407048	0.318998	0.810925	0		2	stabilized
P11586	C-1-tetrahydrofolate synthase, cytoplasmic OS=Homo sapiens OX=9606 GN=MTHFD1 PE=1 SV=3	MTHFD1	0.033177	0.0118601	0.0541559	-0.580086	-0.407048	0.854131	0.30299	0		2	stabilized
O15067	Phosphoribosylformylglycinamidine synthase OS=Homo sapiens OX=9606 GN=PFAS PE=1 SV=4	PFAS	-0.00534553	0.0180009	0.0498862	-0.578463	-0.405785	0.764868	0.339382	0		2	stabilized
O15371	Eukaryotic translation initiation factor 3 subunit D OS=Homo sapiens OX=9606 GN=EIF3D PE=1 SV=1	EIF3D	0.0999877	0.0316765	0.0384883	-0.577271	-0.40512	0.578386	0.449589	0		2	stabilized
O43708	Maleylacetoacetate isomerase OS=Homo sapiens OX=9606 GN=GSTZ1 PE=1 SV=3	GSTZ1	0.0196129	0.0524846	0.0126922	-0.575164	-0.403715	0.344022	0.760316	0		2	stabilized
Q99613	Eukaryotic translation initiation factor 3 subunit C OS=Homo sapiens OX=9606 GN=EIF3C PE=1 SV=1	EIF3C	0.0608423	0.00671959	0.056739	-0.574028	-0.402796	0.930371	0.282282	0		2	stabilized
O75947	ATP synthase subunit d, mitochondrial OS=Homo sapiens OX=9606 GN=ATP5PD PE=1 SV=3	ATP5PD	-0.00192106	0.0265796	0.0427542	-0.573895	-0.402796	0.645452	0.40615	0		2	stabilized
Q14344	Guanine nucleotide-binding protein subunit alpha-13 OS=Homo sapiens OX=9606 GN=GNA13 PE=1 SV=2	GNA13	-0.0674485	0.0265929	0.042597	-0.572367	-0.402305	0.645272	0.407705	0		2	stabilized
O60664	Perilipin-3 OS=Homo sapiens OX=9606 GN=PLIN3 PE=1 SV=3	PLIN3	0.000282286	0.0178081	0.049386	-0.571307	-0.401725	0.767631	0.343821	0		2	stabilized
P40939	Trifunctional enzyme subunit alpha, mitochondrial OS=Homo sapiens OX=9606 GN=HADHA PE=1 SV=2	HADHA	0.030125	0.0397024	0.029486	-0.57125	-0.401725	0.479961	0.549374	0		2	stabilized
Q9Y2A7	Nck-associated protein 1 OS=Homo sapiens OX=9606 GN=NCKAP1 PE=1 SV=1	NCKAP1	0.0015813	0.0507678	0.0147283	-0.570232	-0.401274	0.360701	0.733355	0		2	stabilized
P30622	CAP-Gly domain-containing linker protein 1 OS=Homo sapiens OX=9606 GN=CLIP1 PE=1 SV=2	CLIP1	-0.0520415	0.0283159	0.0408568	-0.569924	-0.401274	0.622241	0.425153	0		2	stabilized
Q96IX5	ATP synthase membrane subunit DAPIT, mitochondrial OS=Homo sapiens OX=9606 GN=ATP5MD PE=1 SV=1	ATP5MD	-0.089015	0.0557594	0.00613278	-0.567805	-0.400251	0.313595	0.849014	0		2	stabilized
O14757	Serine/threonine-protein kinase Chk1 OS=Homo sapiens OX=9606 GN=CHEK1 PE=1 SV=2	CHEK1	-0.0361659	0.00321933	0.0581329	-0.567403	-0.400141	0.982696	0.271516	0		2	stabilized
Q02790	Peptidyl-prolyl cis-trans isomerase FKBP4 OS=Homo sapiens OX=9606 GN=FKBP4 PE=1 SV=3	FKBP4	-0.00953333	0.0290531	0.0397453	-0.565334	-0.399146	0.612498	0.436523	0		2	stabilized
Q9Y4L1	Hypoxia up-regulated protein 1 OS=Homo sapiens OX=9606 GN=HYOU1 PE=1 SV=1	HYOU1	-0.0348308	0.0158603	0.0502126	-0.565181	-0.399146	0.795696	0.336505	0		2	stabilized
Q96IV0	Peptide-N(4)-(N-acetyl-beta-glucosaminyl)asparagine amidase OS=Homo sapiens OX=9606 GN=NGLY1 PE=1 SV=1	NGLY1	0.0391587	0.0515216	0.0128734	-0.565021	-0.399146	0.353316	0.757905	0		2	stabilized
Q15003	Condensin complex subunit 2 OS=Homo sapiens OX=9606 GN=NCAPH PE=1 SV=3	NCAPH	0.0478093	0.0411308	0.0270971	-0.564787	-0.399085	0.463453	0.577576	0		2	stabilized
Q9Y2T2	AP-3 complex subunit mu-1 OS=Homo sapiens OX=9606 GN=AP3M1 PE=1 SV=1	AP3M1	-0.0565537	0.0126062	0.0522718	-0.563776	-0.398273	0.843161	0.318716	0		2	stabilized
P35659	Protein DEK OS=Homo sapiens OX=9606 GN=DEK PE=1 SV=1	DEK	0.0182376	0.00842771	0.0548346	-0.563288	-0.398273	0.904931	0.297454	0		2	stabilized
Q8NBJ5	Procollagen galactosyltransferase 1 OS=Homo sapiens OX=9606 GN=COLGALT1 PE=1 SV=1	COLGALT1	-0.00846691	0.00756961	0.055343	-0.563283	-0.398273	0.917701	0.293352	0		2	stabilized
Q9P2D3	HEAT repeat-containing protein 5B OS=Homo sapiens OX=9606 GN=HEATR5B PE=1 SV=2	HEATR5B	-0.0534335	0.0562062	0.00463682	-0.56311	-0.398273	0.309586	0.869558	0		2	stabilized
P12270	Nucleoprotein TPR OS=Homo sapiens OX=9606 GN=TPR PE=1 SV=3	TPR	0.0534304	0.0210845	0.0461119	-0.562077	-0.398177	0.721119	0.37379	0		2	stabilized
Q6IAN0	Dehydrogenase/reductase SDR family member 7B OS=Homo sapiens OX=9606 GN=DHRS7B PE=1 SV=2	DHRS7B	0.0372021	0.0275416	0.0407711	-0.561979	-0.398177	0.632547	0.426023	0		2	stabilized
P82909	28S ribosomal protein S36, mitochondrial OS=Homo sapiens OX=9606 GN=MRPS36 PE=1 SV=2	MRPS36	-0.0755545	0.0452404	0.0212811	-0.559416	-0.396474	0.41777	0.648938	0		2	stabilized
O00330	Pyruvate dehydrogenase protein X component, mitochondrial OS=Homo sapiens OX=9606 GN=PDHX PE=1 SV=3	PDHX	0.0177702	0.0168233	0.0488254	-0.557208	-0.395125	0.781784	0.34884	0		2	stabilized
O95757	Heat shock 70 kDa protein 4L OS=Homo sapiens OX=9606 GN=HSPA4L PE=1 SV=3	HSPA4L	0.00221899	0.0445503	0.0219007	-0.556945	-0.395033	0.425251	0.641163	0		2	stabilized
O15530	3-phosphoinositide-dependent protein kinase 1 OS=Homo sapiens OX=9606 GN=PDPK1 PE=1 SV=1	PDPK1	-0.0458827	0.00605001	0.0556256	-0.556179	-0.39461	0.940364	0.291087	0		2	stabilized
P09001	39S ribosomal protein L3, mitochondrial OS=Homo sapiens OX=9606 GN=MRPL3 PE=1 SV=1	MRPL3	-0.0146803	0.0477822	0.0172466	-0.55526	-0.394298	0.390893	0.700461	0		2	stabilized
O15382	Branched-chain-amino-acid aminotransferase, mitochondrial OS=Homo sapiens OX=9606 GN=BCAT2 PE=1 SV=2	BCAT2	0.0934404	0.042824	0.0237856	-0.554041	-0.39367	0.444302	0.617759	0		2	stabilized
O43175	D-3-phosphoglycerate dehydrogenase OS=Homo sapiens OX=9606 GN=PHGDH PE=1 SV=4	PHGDH	-0.0118182	0.0507317	0.0126311	-0.553844	-0.393644	0.361057	0.761129	0		2	stabilized
Q9NVA2	Septin-11 OS=Homo sapiens OX=9606 GN=SEPTIN11 PE=1 SV=3	SEPTIN11	-0.0143083	0.0171337	0.0482621	-0.553415	-0.393556	0.777316	0.353931	0		2	stabilized
P55786	Puromycin-sensitive aminopeptidase OS=Homo sapiens OX=9606 GN=NPEPPS PE=1 SV=2	NPEPPS	0.00243708	0.0293408	0.0382159	-0.552553	-0.393036	0.608715	0.452449	0		2	stabilized
Q92995	Ubiquitin carboxyl-terminal hydrolase 13 OS=Homo sapiens OX=9606 GN=USP13 PE=1 SV=2	USP13	0.0167582	0.0485406	0.0155487	-0.550611	-0.391776	0.383082	0.722582	0		2	stabilized
P42892	Endothelin-converting enzyme 1 OS=Homo sapiens OX=9606 GN=ECE1 PE=1 SV=2	ECE1	-0.00226989	0.0110512	0.0519944	-0.5491	-0.390945	0.866057	0.321076	0		2	stabilized
Q7KZF4	Staphylococcal nuclease domain-containing protein 1 OS=Homo sapiens OX=9606 GN=SND1 PE=1 SV=1	SND1	0.0895519	0.0150471	0.0492984	-0.548598	-0.390784	0.807494	0.344602	0		2	stabilized
P20020	Plasma membrane calcium-transporting ATPase 1 OS=Homo sapiens OX=9606 GN=ATP2B1 PE=1 SV=4	ATP2B1	-0.0499754	0.0383115	0.0285096	-0.547922	-0.390617	0.496338	0.560818	0		2	stabilized
Q29RF7	Sister chromatid cohesion protein PDS5 homolog A OS=Homo sapiens OX=9606 GN=PDS5A PE=1 SV=1	PDS5A	0.0542369	0.049515	0.0135822	-0.546772	-0.389806	0.373188	0.748493	0		2	stabilized
P49589	Cysteine--tRNA ligase, cytoplasmic OS=Homo sapiens OX=9606 GN=CARS PE=1 SV=3	CARS	0.0411996	0.0297646	0.0371186	-0.545561	-0.389104	0.60316	0.464076	0		2	stabilized
A0AVT1	Ubiquitin-like modifier-activating enzyme 6 OS=Homo sapiens OX=9606 GN=UBA6 PE=1 SV=1	UBA6	-0.0278736	0.0508428	0.0113029	-0.545257	-0.388969	0.359962	0.778884	0		2	stabilized
Q7Z3U7	Protein MON2 homolog OS=Homo sapiens OX=9606 GN=MON2 PE=1 SV=3	MON2	-0.0426222	0.00588311	0.0546086	-0.543036	-0.387851	0.942857	0.29929	0		2	stabilized
Q53T59	HCLS1-binding protein 3 OS=Homo sapiens OX=9606 GN=HS1BP3 PE=1 SV=1	HS1BP3	0.0520183	0.0463284	0.0177729	-0.542956	-0.387851	0.406135	0.693656	0		2	stabilized
Q9Y399	28S ribosomal protein S2, mitochondrial OS=Homo sapiens OX=9606 GN=MRPS2 PE=1 SV=1	MRPS2	0.016023	0.00500014	0.0550555	-0.542346	-0.387579	0.956052	0.295666	0		2	stabilized
P53701	Cytochrome c-type heme lyase OS=Homo sapiens OX=9606 GN=HCCS PE=1 SV=1	HCCS	0.175775	0.0477538	0.0154636	-0.540915	-0.386654	0.391188	0.723696	0		2	stabilized
Q8NBL1	Protein O-glucosyltransferase 1 OS=Homo sapiens OX=9606 GN=POGLUT1 PE=1 SV=1	POGLUT1	0.0441952	0.026697	0.0393641	-0.53998	-0.386224	0.64387	0.440463	0		2	stabilized
P09525	Annexin A4 OS=Homo sapiens OX=9606 GN=ANXA4 PE=1 SV=4	ANXA4	-0.0266528	0.0326034	0.03361	-0.538363	-0.385008	0.566551	0.502345	0		2	stabilized
Q15019	Septin-2 OS=Homo sapiens OX=9606 GN=SEPTIN2 PE=1 SV=1	SEPTIN2	0.0137102	0.0247733	0.0408134	-0.537704	-0.38463	0.669968	0.425595	0		2	stabilized
O60645	Exocyst complex component 3 OS=Homo sapiens OX=9606 GN=EXOC3 PE=1 SV=3	EXOC3	-0.0584873	0.0130286	0.0496408	-0.537053	-0.384474	0.836964	0.341555	0		2	stabilized
Q01581	Hydroxymethylglutaryl-CoA synthase, cytoplasmic OS=Homo sapiens OX=9606 GN=HMGCS1 PE=1 SV=2	HMGCS1	-0.102807	0.0398964	0.0249748	-0.533071	-0.381798	0.4777	0.603187	0		2	stabilized
P62195	26S proteasome regulatory subunit 8 OS=Homo sapiens OX=9606 GN=PSMC5 PE=1 SV=1	PSMC5	0.0154397	0.0152234	0.0476744	-0.53194	-0.381037	0.804932	0.359292	0		2	stabilized
P22033	Methylmalonyl-CoA mutase, mitochondrial OS=Homo sapiens OX=9606 GN=MMUT PE=1 SV=4	MMUT	0.0458975	0.0222521	0.0423202	-0.531558	-0.380953	0.70478	0.410451	0		2	stabilized
O00571	ATP-dependent RNA helicase DDX3X OS=Homo sapiens OX=9606 GN=DDX3X PE=1 SV=3	DDX3X	0.0277759	0.0202308	0.0439265	-0.531522	-0.380953	0.733147	0.394667	0		2	stabilized
Q92974	Rho guanine nucleotide exchange factor 2 OS=Homo sapiens OX=9606 GN=ARHGEF2 PE=1 SV=4	ARHGEF2	0.0106905	0.0237497	0.0407229	-0.52785	-0.377854	0.684021	0.426514	0		2	stabilized
P35268	60S ribosomal protein L22 OS=Homo sapiens OX=9606 GN=RPL22 PE=1 SV=2	RPL22	-0.0493738	0.0259105	0.0387718	-0.526957	-0.377555	0.65449	0.446623	0		2	stabilized
Q969V3	Nicalin OS=Homo sapiens OX=9606 GN=NCLN PE=1 SV=2	NCLN	-0.0401139	0.039562	0.0244577	-0.525084	-0.376367	0.481601	0.609505	0		2	stabilized
P05026	Sodium/potassium-transporting ATPase subunit beta-1 OS=Homo sapiens OX=9606 GN=ATP1B1 PE=1 SV=1	ATP1B1	0.0448209	0.0471355	0.0142152	-0.524229	-0.375993	0.397629	0.74012	0		2	stabilized
Q16644	MAP kinase-activated protein kinase 3 OS=Homo sapiens OX=9606 GN=MAPKAPK3 PE=1 SV=1	MAPKAPK3	-0.0257848	0.0480145	0.0127498	-0.523132	-0.375306	0.38849	0.75955	0		2	stabilized
Q9BQS8	FYVE and coiled-coil domain-containing protein 1 OS=Homo sapiens OX=9606 GN=FYCO1 PE=1 SV=3	FYCO1	-0.0330541	0.0188791	0.0441724	-0.523044	-0.375306	0.752325	0.392283	0		2	stabilized
P27348	14-3-3 protein theta OS=Homo sapiens OX=9606 GN=YWHAQ PE=1 SV=1	YWHAQ	0.0162616	0.0037045	0.0541119	-0.522659	-0.375107	0.975434	0.303352	0		2	stabilized
Q99584	Protein S100-A13 OS=Homo sapiens OX=9606 GN=S100A13 PE=1 SV=1	S100A13	-0.0749005	0.0211096	0.0423252	-0.521972	-0.375107	0.720766	0.410402	0		2	stabilized
Q14204	Cytoplasmic dynein 1 heavy chain 1 OS=Homo sapiens OX=9606 GN=DYNC1H1 PE=1 SV=5	DYNC1H1	0.00965654	0.046067	0.0154799	-0.521924	-0.375107	0.408912	0.723484	0		2	stabilized
Q9NZW5	MAGUK p55 subfamily member 6 OS=Homo sapiens OX=9606 GN=MPP6 PE=1 SV=2	MPP6	0.0298379	0.0147446	0.0470176	-0.521034	-0.374581	0.811895	0.365343	0		2	stabilized
O15118	NPC intracellular cholesterol transporter 1 OS=Homo sapiens OX=9606 GN=NPC1 PE=1 SV=2	NPC1	0.047147	0.0250469	0.0386774	-0.518361	-0.373138	0.666231	0.447609	0		2	stabilized
P63167	Dynein light chain 1, cytoplasmic OS=Homo sapiens OX=9606 GN=DYNLL1 PE=1 SV=1	DYNLL1	-0.0836958	0.00485385	0.0529324	-0.516552	-0.372095	0.958239	0.313143	0		2	stabilized
Q92575	UBX domain-containing protein 4 OS=Homo sapiens OX=9606 GN=UBXN4 PE=1 SV=2	UBXN4	-0.0473775	0.0235073	0.039759	-0.515889	-0.371901	0.687365	0.436382	0		2	stabilized
Q9NVM4	Protein arginine N-methyltransferase 7 OS=Homo sapiens OX=9606 GN=PRMT7 PE=1 SV=1	PRMT7	0.00499959	0.0508853	0.00612635	-0.508713	-0.367074	0.359543	0.849102	0		2	stabilized
P49585	Choline-phosphate cytidylyltransferase A OS=Homo sapiens OX=9606 GN=PCYT1A PE=1 SV=2	PCYT1A	-0.0207035	0.0244985	0.0380876	-0.507625	-0.366477	0.67373	0.4538	0		2	stabilized
Q9NXH9	tRNA (guanine(26)-N(2))-dimethyltransferase OS=Homo sapiens OX=9606 GN=TRMT1 PE=1 SV=1	TRMT1	0.00831274	0.0523523	0.00322991	-0.506504	-0.365847	0.34529	0.88896	0		2	stabilized
Q9H9A6	Leucine-rich repeat-containing protein 40 OS=Homo sapiens OX=9606 GN=LRRC40 PE=1 SV=1	LRRC40	-0.0409871	0.0406939	0.0207771	-0.505844	-0.365676	0.468468	0.65529	0		2	stabilized
Q99714	3-hydroxyacyl-CoA dehydrogenase type-2 OS=Homo sapiens OX=9606 GN=HSD17B10 PE=1 SV=3	HSD17B10	-0.00247129	0.027649	0.0349354	-0.504675	-0.364997	0.631114	0.487696	0		2	stabilized
Q9Y490	Talin-1 OS=Homo sapiens OX=9606 GN=TLN1 PE=1 SV=3	TLN1	0.026549	0.000767619	0.051666	-0.504037	-0.364522	0.980595	0.323885	0		2	stabilized
O14530	Thioredoxin domain-containing protein 9 OS=Homo sapiens OX=9606 GN=TXNDC9 PE=1 SV=2	TXNDC9	-0.0211052	0.0112019	0.0476893	-0.5018	-0.362848	0.863833	0.359155	0		2	stabilized
P08559	Pyruvate dehydrogenase E1 component subunit alpha, somatic form, mitochondrial OS=Homo sapiens OX=9606 GN=PDHA1 PE=1 SV=3	PDHA1	-0.000636524	0.0298762	0.032457	-0.501507	-0.362848	0.6017	0.515275	0		2	stabilized
P42704	Leucine-rich PPR motif-containing protein, mitochondrial OS=Homo sapiens OX=9606 GN=LRPPRC PE=1 SV=3	LRPPRC	0.045124	0.00842075	0.0494614	-0.501503	-0.362848	0.905035	0.34315	0		2	stabilized
Q9Y394	Dehydrogenase/reductase SDR family member 7 OS=Homo sapiens OX=9606 GN=DHRS7 PE=1 SV=1	DHRS7	-0.00383774	0.0365625	0.0252247	-0.500891	-0.362839	0.517347	0.600145	0		2	stabilized
Q7Z4G4	tRNA (guanine(10)-N2)-methyltransferase homolog OS=Homo sapiens OX=9606 GN=TRMT11 PE=1 SV=1	TRMT11	0.0989572	0.0394654	0.0216507	-0.500193	-0.362304	0.48273	0.644296	0		2	stabilized
P36871	Phosphoglucomutase-1 OS=Homo sapiens OX=9606 GN=PGM1 PE=1 SV=3	PGM1	-0.0462389	0.0383183	0.0228659	-0.498528	-0.360801	0.496257	0.629133	0		2	stabilized
Q9NS87	Kinesin-like protein KIF15 OS=Homo sapiens OX=9606 GN=KIF15 PE=1 SV=1	KIF15	-0.0188336	0.0147497	0.0448405	-0.497497	-0.359932	0.81182	0.385851	0		2	stabilized
O14737	Programmed cell death protein 5 OS=Homo sapiens OX=9606 GN=PDCD5 PE=1 SV=3	PDCD5	-0.0620511	0.0301558	0.0316967	-0.496977	-0.359898	0.598051	0.523896	0		2	stabilized
Q9Y678	Coatomer subunit gamma-1 OS=Homo sapiens OX=9606 GN=COPG1 PE=1 SV=1	COPG1	-0.00936044	0.0169705	0.0430072	-0.495381	-0.359273	0.779664	0.403655	0		2	stabilized
Q13425	Beta-2-syntrophin OS=Homo sapiens OX=9606 GN=SNTB2 PE=1 SV=1	SNTB2	0.036163	0.027492	0.0339621	-0.493865	-0.358469	0.633211	0.49843	0		2	stabilized
P68400	Casein kinase II subunit alpha OS=Homo sapiens OX=9606 GN=CSNK2A1 PE=1 SV=1	CSNK2A1	0.0379206	0.00860789	0.0486502	-0.493769	-0.358469	0.902253	0.350419	0		2	stabilized
Q9UBF2	Coatomer subunit gamma-2 OS=Homo sapiens OX=9606 GN=COPG2 PE=1 SV=1	COPG2	-0.0509751	0.0524218	0.000908144	-0.492099	-0.357157	0.344623	0.921118	0		2	stabilized
P30530	Tyrosine-protein kinase receptor UFO OS=Homo sapiens OX=9606 GN=AXL PE=1 SV=4	AXL	0.00471433	0.0372976	0.0230222	-0.489385	-0.354974	0.508462	0.627193	0		2	stabilized
Q15154	Pericentriolar material 1 protein OS=Homo sapiens OX=9606 GN=PCM1 PE=1 SV=5	PCM1	-0.0406816	0.0203751	0.0396697	-0.488461	-0.354932	0.73111	0.437302	0		2	stabilized
Q9HCE1	Helicase MOV-10 OS=Homo sapiens OX=9606 GN=MOV10 PE=1 SV=2	MOV10	0.057055	0.0131304	0.0450084	-0.486969	-0.353801	0.835472	0.384245	0		2	stabilized
O95363	Phenylalanine--tRNA ligase, mitochondrial OS=Homo sapiens OX=9606 GN=FARS2 PE=1 SV=1	FARS2	-0.0759228	0.000862392	0.0501879	-0.486442	-0.353715	0.982014	0.336722	0		2	stabilized
Q9Y376	Calcium-binding protein 39 OS=Homo sapiens OX=9606 GN=CAB39 PE=1 SV=1	CAB39	-0.0153734	0.0316558	0.0287218	-0.483758	-0.352632	0.578651	0.558321	0		2	stabilized
Q969X6	U3 small nucleolar RNA-associated protein 4 homolog OS=Homo sapiens OX=9606 GN=UTP4 PE=1 SV=1	UTP4	0.0493664	0.0445688	0.0124735	-0.482247	-0.35144	0.425049	0.76323	0		2	stabilized
P46821	Microtubule-associated protein 1B OS=Homo sapiens OX=9606 GN=MAP1B PE=1 SV=2	MAP1B	0.0213241	0.00313194	0.0508603	-0.481423	-0.351095	0.984004	0.330842	0		2	stabilized
Q9BZK7	F-box-like/WD repeat-containing protein TBL1XR1 OS=Homo sapiens OX=9606 GN=TBL1XR1 PE=1 SV=1	TBL1XR1	0.0255264	0.0319396	0.0280702	-0.480585	-0.350657	0.575015	0.566006	0		2	stabilized
O95685	Protein phosphatase 1 regulatory subunit 3D OS=Homo sapiens OX=9606 GN=PPP1R3D PE=1 SV=1	PPP1R3D	-0.0282552	0.0370767	0.0221766	-0.479976	-0.350445	0.511124	0.637715	0		2	stabilized
O60701	UDP-glucose 6-dehydrogenase OS=Homo sapiens OX=9606 GN=UGDH PE=1 SV=1	UGDH	-0.000206951	0.0481431	0.00655038	-0.4797	-0.350328	0.387164	0.843297	0		2	stabilized
Q13136	Liprin-alpha-1 OS=Homo sapiens OX=9606 GN=PPFIA1 PE=1 SV=1	PPFIA1	-0.112882	0.035983	0.0233559	-0.478921	-0.349708	0.524409	0.623062	0		2	stabilized
P13639	Elongation factor 2 OS=Homo sapiens OX=9606 GN=EEF2 PE=1 SV=4	EEF2	0.00167574	0.0445021	0.0121032	-0.478737	-0.349683	0.425776	0.768172	0		2	stabilized
Q96K76	Ubiquitin carboxyl-terminal hydrolase 47 OS=Homo sapiens OX=9606 GN=USP47 PE=1 SV=3	USP47	-0.00956843	0.023441	0.0358816	-0.476594	-0.348176	0.688281	0.47738	0		2	stabilized
O60568	Multifunctional procollagen lysine hydroxylase and glycosyltransferase LH3 OS=Homo sapiens OX=9606 GN=PLOD3 PE=1 SV=1	PLOD3	0.0089034	0.0484537	0.00514256	-0.47356	-0.345554	0.383972	0.862602	0		2	stabilized
Q9UNW1	Multiple inositol polyphosphate phosphatase 1 OS=Homo sapiens OX=9606 GN=MINPP1 PE=1 SV=1	MINPP1	0.022779	0.0261821	0.0330646	-0.473496	-0.345554	0.650815	0.50844	0		2	stabilized
P34897	Serine hydroxymethyltransferase, mitochondrial OS=Homo sapiens OX=9606 GN=SHMT2 PE=1 SV=3	SHMT2	-0.00412634	0.0442085	0.0116353	-0.472012	-0.344704	0.428984	0.774429	0		2	stabilized
P26196	Probable ATP-dependent RNA helicase DDX6 OS=Homo sapiens OX=9606 GN=DDX6 PE=1 SV=2	DDX6	0.00362551	0.0291356	0.0298863	-0.470675	-0.344158	0.611412	0.544716	0		2	stabilized
Q53EP0	Fibronectin type III domain-containing protein 3B OS=Homo sapiens OX=9606 GN=FNDC3B PE=1 SV=2	FNDC3B	0.0901944	0.0249461	0.0336942	-0.46854	-0.342813	0.667607	0.501407	0		2	stabilized
O43615	Mitochondrial import inner membrane translocase subunit TIM44 OS=Homo sapiens OX=9606 GN=TIMM44 PE=1 SV=2	TIMM44	0.0132625	0.0409225	0.0153189	-0.464446	-0.34097	0.465841	0.725595	0		2	stabilized
Q96SW2	Protein cereblon OS=Homo sapiens OX=9606 GN=CRBN PE=1 SV=1	CRBN	0.0349275	0.0164552	0.0403378	-0.46358	-0.340841	0.787095	0.430441	0		2	stabilized
Q9Y3F4	Serine-threonine kinase receptor-associated protein OS=Homo sapiens OX=9606 GN=STRAP PE=1 SV=1	STRAP	0.0210182	0.0363217	0.0209968	-0.462453	-0.340027	0.520276	0.652517	0		2	stabilized
Q9UBI6	Guanine nucleotide-binding protein G(I)/G(S)/G(O) subunit gamma-12 OS=Homo sapiens OX=9606 GN=GNG12 PE=1 SV=3	GNG12	-0.0108682	0.0426486	0.0125964	-0.462154	-0.340003	0.446265	0.761593	0		2	stabilized
P35580	Myosin-10 OS=Homo sapiens OX=9606 GN=MYH10 PE=1 SV=3	MYH10	0.0810373	0.00377283	0.0486819	-0.461132	-0.339801	0.974411	0.350133	0		2	stabilized
Q5TC12	ATP synthase mitochondrial F1 complex assembly factor 1 OS=Homo sapiens OX=9606 GN=ATPAF1 PE=1 SV=1	ATPAF1	-0.0339952	0.0353125	0.0218445	-0.459413	-0.339019	0.53264	0.641867	0		2	stabilized
P08195	4F2 cell-surface antigen heavy chain OS=Homo sapiens OX=9606 GN=SLC3A2 PE=1 SV=3	SLC3A2	0.0108968	0.020704	0.0363746	-0.458214	-0.338442	0.726471	0.472053	0		2	stabilized
Q15643	Thyroid receptor-interacting protein 11 OS=Homo sapiens OX=9606 GN=TRIP11 PE=1 SV=3	TRIP11	-0.0792424	0.032566	0.02467	-0.456566	-0.337262	0.567026	0.606908	0		2	stabilized
P11498	Pyruvate carboxylase, mitochondrial OS=Homo sapiens OX=9606 GN=PC PE=1 SV=2	PC	-0.00401276	0.0352877	0.0210057	-0.452158	-0.33332	0.532946	0.652405	0		2	stabilized
O76094	Signal recognition particle subunit SRP72 OS=Homo sapiens OX=9606 GN=SRP72 PE=1 SV=3	SRP72	0.000809254	0.0295335	0.0273226	-0.45115	-0.332932	0.606186	0.574885	0		2	stabilized
Q9BW19	Kinesin-like protein KIFC1 OS=Homo sapiens OX=9606 GN=KIFC1 PE=1 SV=2	KIFC1	0.0194274	0.0414574	0.0127468	-0.450466	-0.332404	0.459724	0.75959	0		2	stabilized
Q6P9B6	MTOR-associated protein MEAK7 OS=Homo sapiens OX=9606 GN=MEAK7 PE=1 SV=2	MEAK7	0.0134014	1.1318e-05	0.0464333	-0.450141	-0.332234	0.969276	0.370779	0		2	stabilized
Q8NBM4	Ubiquitin-associated domain-containing protein 2 OS=Homo sapiens OX=9606 GN=UBAC2 PE=1 SV=1	UBAC2	-0.0475938	0.0346105	0.0214679	-0.449286	-0.331998	0.541328	0.64659	0		2	stabilized
Q8NEB9	Phosphatidylinositol 3-kinase catalytic subunit type 3 OS=Homo sapiens OX=9606 GN=PIK3C3 PE=1 SV=1	PIK3C3	-0.0124047	0.0288224	0.0275369	-0.446472	-0.330051	0.615541	0.572332	0		2	stabilized
P48047	ATP synthase subunit O, mitochondrial OS=Homo sapiens OX=9606 GN=ATP5PO PE=1 SV=1	ATP5PO	-0.0455781	0.0375098	0.0174916	-0.445972	-0.32992	0.505912	0.697291	0		2	stabilized
Q6XZF7	Dynamin-binding protein OS=Homo sapiens OX=9606 GN=DNMBP PE=1 SV=1	DNMBP	0.01489	0.0221256	0.0337933	-0.445107	-0.329364	0.706544	0.500305	0		2	stabilized
P52272	Heterogeneous nuclear ribonucleoprotein M OS=Homo sapiens OX=9606 GN=HNRNPM PE=1 SV=3	HNRNPM	-0.0869985	0.0484381	0.000220397	-0.44079	-0.326587	0.384132	0.930671	0		2	stabilized
P61962	DDB1- and CUL4-associated factor 7 OS=Homo sapiens OX=9606 GN=DCAF7 PE=1 SV=1	DCAF7	0.0488153	0.0363722	0.0180674	-0.439021	-0.325585	0.519661	0.689858	0		2	stabilized
P38435	Vitamin K-dependent gamma-carboxylase OS=Homo sapiens OX=9606 GN=GGCX PE=1 SV=2	GGCX	-0.03621	0.017578	0.0368622	-0.437492	-0.324825	0.77093	0.466817	0		2	stabilized
P30566	Adenylosuccinate lyase OS=Homo sapiens OX=9606 GN=ADSL PE=1 SV=2	ADSL	0.0168961	0.0263688	0.0288501	-0.435997	-0.32394	0.648294	0.556815	0		2	stabilized
P15170	Eukaryotic peptide chain release factor GTP-binding subunit ERF3A OS=Homo sapiens OX=9606 GN=GSPT1 PE=1 SV=1	GSPT1	-0.0126324	0.0408535	0.01165	-0.435825	-0.32392	0.466633	0.774232	0		2	stabilized
Q9Y4E8	Ubiquitin carboxyl-terminal hydrolase 15 OS=Homo sapiens OX=9606 GN=USP15 PE=1 SV=3	USP15	-0.0197363	0.00281046	0.0468537	-0.434673	-0.323074	0.988818	0.366863	0		2	stabilized
P27635	60S ribosomal protein L10 OS=Homo sapiens OX=9606 GN=RPL10 PE=1 SV=4	RPL10	0.0506267	0.0032621	0.046378	-0.432425	-0.321284	0.982056	0.371296	0		2	stabilized
P49959	Double-strand break repair protein MRE11 OS=Homo sapiens OX=9606 GN=MRE11 PE=1 SV=3	MRE11	-0.00564215	0.00923932	0.0424586	-0.431407	-0.320712	0.892876	0.409077	0		2	stabilized
Q9UBP6	tRNA (guanine-N(7)-)-methyltransferase OS=Homo sapiens OX=9606 GN=METTL1 PE=1 SV=1	METTL1	0.12065	0.0290645	0.02531	-0.429016	-0.318735	0.612349	0.599108	0		2	stabilized
Q9NWY4	Histone PARylation factor 1 OS=Homo sapiens OX=9606 GN=HPF1 PE=1 SV=2	HPF1	-0.00388211	0.0301329	0.0241284	-0.428722	-0.318649	0.59835	0.613543	0		2	stabilized
P49023	Paxillin OS=Homo sapiens OX=9606 GN=PXN PE=1 SV=3	PXN	0.0130974	0.0299777	0.0241689	-0.427618	-0.318304	0.600374	0.613046	0		2	stabilized
Q6ZXV5	Protein O-mannosyl-transferase TMTC3 OS=Homo sapiens OX=9606 GN=TMTC3 PE=1 SV=2	TMTC3	0.0288608	0.0133047	0.0390908	-0.426569	-0.31756	0.832917	0.443299	0		2	stabilized
P04406	Glyceraldehyde-3-phosphate dehydrogenase OS=Homo sapiens OX=9606 GN=GAPDH PE=1 SV=3	GAPDH	0.0483741	0.0289671	0.0248513	-0.424118	-0.315912	0.613631	0.604694	0		2	stabilized
P50990	T-complex protein 1 subunit theta OS=Homo sapiens OX=9606 GN=CCT8 PE=1 SV=4	CCT8	0.00322753	0.0209501	0.0325217	-0.423097	-0.315452	0.723008	0.514546	0		2	stabilized
Q14061	Cytochrome c oxidase copper chaperone OS=Homo sapiens OX=9606 GN=COX17 PE=1 SV=2	COX17	0.030823	0.023963	0.0295228	-0.420896	-0.31431	0.681084	0.548945	0		2	stabilized
Q9NZM1	Myoferlin OS=Homo sapiens OX=9606 GN=MYOF PE=1 SV=1	MYOF	0.0363007	0.0190701	0.0336976	-0.418748	-0.312463	0.749606	0.50137	0		2	stabilized
Q9BQ52	Zinc phosphodiesterase ELAC protein 2 OS=Homo sapiens OX=9606 GN=ELAC2 PE=1 SV=2	ELAC2	0.0775719	0.0268564	0.0263905	-0.418334	-0.3122	0.641728	0.586046	0		2	stabilized
P61163	Alpha-centractin OS=Homo sapiens OX=9606 GN=ACTR1A PE=1 SV=1	ACTR1A	-0.0120478	0.0403176	0.0099548	-0.417681	-0.311729	0.472812	0.797022	0		2	stabilized
Q5T447	E3 ubiquitin-protein ligase HECTD3 OS=Homo sapiens OX=9606 GN=HECTD3 PE=1 SV=1	HECTD3	-0.0134063	0.0204784	0.0322496	-0.416594	-0.311448	0.729652	0.51762	0		2	stabilized
P52732	Kinesin-like protein KIF11 OS=Homo sapiens OX=9606 GN=KIF11 PE=1 SV=2	KIF11	-0.00599885	0.0157714	0.0361831	-0.416511	-0.311448	0.796984	0.474118	0		2	stabilized
P40616	ADP-ribosylation factor-like protein 1 OS=Homo sapiens OX=9606 GN=ARL1 PE=1 SV=1	ARL1	0.0839781	0.0372526	0.0137535	-0.414174	-0.310548	0.509004	0.746224	0		2	stabilized
Q9P0I2	ER membrane protein complex subunit 3 OS=Homo sapiens OX=9606 GN=EMC3 PE=1 SV=3	EMC3	-0.0331673	0.024551	0.028213	-0.414124	-0.310548	0.673011	0.564317	0		2	stabilized
O15498	Synaptobrevin homolog YKT6 OS=Homo sapiens OX=9606 GN=YKT6 PE=1 SV=1	YKT6	-0.110623	0.0372956	0.0133487	-0.411533	-0.309154	0.508486	0.751589	0		2	stabilized
P52888	Thimet oligopeptidase OS=Homo sapiens OX=9606 GN=THOP1 PE=1 SV=2	THOP1	-0.0368387	0.0436717	0.00340399	-0.408039	-0.306855	0.434886	0.886555	0		2	stabilized
P62256	Ubiquitin-conjugating enzyme E2 H OS=Homo sapiens OX=9606 GN=UBE2H PE=1 SV=1	UBE2H	-0.007402	0.0242611	0.0277708	-0.407609	-0.306621	0.676986	0.569554	0		2	stabilized
Q9H3P7	Golgi resident protein GCP60 OS=Homo sapiens OX=9606 GN=ACBD3 PE=1 SV=4	ACBD3	0.0260463	0.0307645	0.0208726	-0.407121	-0.306533	0.590143	0.654084	0		2	stabilized
Q16836	Hydroxyacyl-coenzyme A dehydrogenase, mitochondrial OS=Homo sapiens OX=9606 GN=HADH PE=1 SV=3	HADH	-0.00981234	0.0100967	0.0394647	-0.406665	-0.306226	0.880168	0.439421	0		2	stabilized
P31939	Bifunctional purine biosynthesis protein PURH OS=Homo sapiens OX=9606 GN=ATIC PE=1 SV=3	ATIC	0.0424702	0.0245125	0.0268847	-0.401889	-0.303914	0.673538	0.580115	0		2	stabilized
Q9Y3C6	Peptidyl-prolyl cis-trans isomerase-like 1 OS=Homo sapiens OX=9606 GN=PPIL1 PE=1 SV=1	PPIL1	0.00743676	0.0426766	0.00400994	-0.401261	-0.303914	0.445951	0.878194	0		2	stabilized
O60763	General vesicular transport factor p115 OS=Homo sapiens OX=9606 GN=USO1 PE=1 SV=2	USO1	0.010593	0.0205525	0.030192	-0.398025	-0.302029	0.728607	0.541171	0		2	stabilized
Q9NV96	Cell cycle control protein 50A OS=Homo sapiens OX=9606 GN=TMEM30A PE=1 SV=1	TMEM30A	-0.0800277	0.0144451	0.0351599	-0.39624	-0.30054	0.816256	0.485237	0		2	stabilized
P33176	Kinesin-1 heavy chain OS=Homo sapiens OX=9606 GN=KIF5B PE=1 SV=1	KIF5B	0.0220074	0.0289318	0.0213644	-0.394075	-0.298859	0.614097	0.64789	0		2	stabilized
Q15417	Calponin-3 OS=Homo sapiens OX=9606 GN=CNN3 PE=1 SV=1	CNN3	-0.0854527	0.00807497	0.0393541	-0.391147	-0.297503	0.910178	0.440566	0		2	stabilized
O43252	Bifunctional 3'-phosphoadenosine 5'-phosphosulfate synthase 1 OS=Homo sapiens OX=9606 GN=PAPSS1 PE=1 SV=2	PAPSS1	0.00096254	0.00530186	0.0411439	-0.390415	-0.297155	0.951541	0.422245	0		2	stabilized
P32322	Pyrroline-5-carboxylate reductase 1, mitochondrial OS=Homo sapiens OX=9606 GN=PYCR1 PE=1 SV=2	PYCR1	-0.0696628	0.0307141	0.0188561	-0.39009	-0.297155	0.590796	0.679725	0		2	stabilized
Q16763	Ubiquitin-conjugating enzyme E2 S OS=Homo sapiens OX=9606 GN=UBE2S PE=1 SV=2	UBE2S	0.00662863	0.00425341	0.0417722	-0.38992	-0.297155	0.96722	0.415921	0		2	stabilized
P36551	Oxygen-dependent coproporphyrinogen-III oxidase, mitochondrial OS=Homo sapiens OX=9606 GN=CPOX PE=1 SV=3	CPOX	-0.00605311	0.0288843	0.0207817	-0.388785	-0.296166	0.614724	0.655231	0		2	stabilized
P51153	Ras-related protein Rab-13 OS=Homo sapiens OX=9606 GN=RAB13 PE=1 SV=1	RAB13	-0.0333691	0.0389441	0.00790638	-0.388566	-0.296093	0.488853	0.824791	0		2	stabilized
Q6ZRP7	Sulfhydryl oxidase 2 OS=Homo sapiens OX=9606 GN=QSOX2 PE=1 SV=3	QSOX2	0.100535	0.0281247	0.0213838	-0.386808	-0.294774	0.62478	0.647646	0		2	stabilized
P25098	Beta-adrenergic receptor kinase 1 OS=Homo sapiens OX=9606 GN=GRK2 PE=1 SV=2	GRK2	-0.0230965	0.0239715	0.0255646	-0.385512	-0.294061	0.680967	0.596019	0		2	stabilized
P62714	Serine/threonine-protein phosphatase 2A catalytic subunit beta isoform OS=Homo sapiens OX=9606 GN=PPP2CB PE=1 SV=1	PPP2CB	0.031147	0.02877	0.0203568	-0.384212	-0.29349	0.616232	0.660605	0		2	stabilized
Q9NVJ2	ADP-ribosylation factor-like protein 8B OS=Homo sapiens OX=9606 GN=ARL8B PE=1 SV=1	ARL8B	0.0452178	0.0429817	0.000190538	-0.379464	-0.290358	0.442542	0.931086	0		2	stabilized
P55011	Solute carrier family 12 member 2 OS=Homo sapiens OX=9606 GN=SLC12A2 PE=1 SV=1	SLC12A2	-0.0203824	0.00354157	0.0411351	-0.378611	-0.289922	0.977872	0.422334	0		2	stabilized
Q96P11	Probable 28S rRNA (cytosine-C(5))-methyltransferase OS=Homo sapiens OX=9606 GN=NSUN5 PE=1 SV=2	NSUN5	-0.028195	0.0190962	0.0291879	-0.376804	-0.288636	0.749235	0.552856	0		2	stabilized
Q15392	Delta(24)-sterol reductase OS=Homo sapiens OX=9606 GN=DHCR24 PE=1 SV=2	DHCR24	-0.115695	0.00039126	0.0397034	-0.375894	-0.288355	0.974962	0.436955	0		2	stabilized
O60282	Kinesin heavy chain isoform 5C OS=Homo sapiens OX=9606 GN=KIF5C PE=1 SV=1	KIF5C	-0.0422152	0.0308884	0.0167271	-0.374681	-0.287294	0.58854	0.707204	0		2	stabilized
P07355	Annexin A2 OS=Homo sapiens OX=9606 GN=ANXA2 PE=1 SV=2	ANXA2	0.00691679	0.0166654	0.0308489	-0.372555	-0.285981	0.784061	0.533594	0		2	stabilized
Q13177	Serine/threonine-protein kinase PAK 2 OS=Homo sapiens OX=9606 GN=PAK2 PE=1 SV=3	PAK2	-0.0407275	0.015318	0.031973	-0.372501	-0.285981	0.803558	0.520754	0		2	stabilized
Q9Y263	Phospholipase A-2-activating protein OS=Homo sapiens OX=9606 GN=PLAA PE=1 SV=2	PLAA	-0.0301177	0.000124547	0.0391802	-0.37232	-0.285944	0.970971	0.44237	0		2	stabilized
Q9Y6R4	Mitogen-activated protein kinase kinase kinase 4 OS=Homo sapiens OX=9606 GN=MAP3K4 PE=1 SV=2	MAP3K4	-0.11159	0.0218917	0.0260361	-0.371799	-0.285711	0.709809	0.590316	0		2	stabilized
Q9Y6Y0	Influenza virus NS1A-binding protein OS=Homo sapiens OX=9606 GN=IVNS1ABP PE=1 SV=3	IVNS1ABP	-0.0932159	0.0295804	0.017567	-0.369065	-0.28371	0.605571	0.696315	0		2	stabilized
Q9H7D7	WD repeat-containing protein 26 OS=Homo sapiens OX=9606 GN=WDR26 PE=1 SV=3	WDR26	-0.0340441	0.0170905	0.0300059	-0.36813	-0.283497	0.777937	0.543328	0		2	stabilized
O95999	B-cell lymphoma/leukemia 10 OS=Homo sapiens OX=9606 GN=BCL10 PE=1 SV=1	BCL10	-0.0685362	0.0417466	0.000291263	-0.36676	-0.282397	0.456436	0.929686	0		2	stabilized
Q16401	26S proteasome non-ATPase regulatory subunit 5 OS=Homo sapiens OX=9606 GN=PSMD5 PE=1 SV=3	PSMD5	0.039991	0.0259422	0.0213224	-0.366567	-0.282351	0.654061	0.648418	0		2	stabilized
O43752	Syntaxin-6 OS=Homo sapiens OX=9606 GN=STX6 PE=1 SV=1	STX6	-0.0580024	0.0273264	0.0197871	-0.366308	-0.282351	0.635425	0.667838	0		2	stabilized
O94808	Glutamine--fructose-6-phosphate aminotransferase [isomerizing] 2 OS=Homo sapiens OX=9606 GN=GFPT2 PE=1 SV=3	GFPT2	0.00471989	0.0126208	0.0333493	-0.364969	-0.281645	0.842946	0.505254	0		2	stabilized
O94776	Metastasis-associated protein MTA2 OS=Homo sapiens OX=9606 GN=MTA2 PE=1 SV=1	MTA2	-0.0215747	0.0306552	0.0154918	-0.362772	-0.280022	0.59156	0.723327	0		2	stabilized
P49593	Protein phosphatase 1F OS=Homo sapiens OX=9606 GN=PPM1F PE=1 SV=3	PPM1F	-0.0186488	0.0391621	0.00382118	-0.362608	-0.280022	0.486288	0.880797	0		2	stabilized
Q13153	Serine/threonine-protein kinase PAK 1 OS=Homo sapiens OX=9606 GN=PAK1 PE=1 SV=2	PAK1	0.0161322	0.00214491	0.0403399	-0.361342	-0.278982	0.998783	0.430419	0		2	stabilized
P15144	Aminopeptidase N OS=Homo sapiens OX=9606 GN=ANPEP PE=1 SV=4	ANPEP	-0.0432409	0.0105232	0.0344229	-0.359798	-0.278206	0.873858	0.493332	0		2	stabilized
O75340	Programmed cell death protein 6 OS=Homo sapiens OX=9606 GN=PDCD6 PE=1 SV=1	PDCD6	0.0116342	0.0106445	0.0343235	-0.359722	-0.278206	0.872064	0.494429	0		2	stabilized
Q9NYS0	NF-kappa-B inhibitor-interacting Ras-like protein 1 OS=Homo sapiens OX=9606 GN=NKIRAS1 PE=1 SV=1	NKIRAS1	-0.0305596	0.0359378	0.0081726	-0.359709	-0.278206	0.524962	0.821169	0		2	stabilized
Q13217	DnaJ homolog subfamily C member 3 OS=Homo sapiens OX=9606 GN=DNAJC3 PE=1 SV=1	DNAJC3	-0.0554438	0.0170913	0.0289282	-0.358272	-0.277251	0.777926	0.555898	0		2	stabilized
Q9UHY1	Nuclear receptor-binding protein OS=Homo sapiens OX=9606 GN=NRBP1 PE=1 SV=1	NRBP1	-0.0679573	0.00429895	0.0386076	-0.357802	-0.277011	0.966539	0.44834	0		2	stabilized
O43390	Heterogeneous nuclear ribonucleoprotein R OS=Homo sapiens OX=9606 GN=HNRNPR PE=1 SV=1	HNRNPR	0.0539467	0.00955787	0.0348625	-0.357081	-0.276432	0.888151	0.488495	0		2	stabilized
Q8WUQ7	Cactin OS=Homo sapiens OX=9606 GN=CACTIN PE=1 SV=3	CACTIN	-0.0531598	0.00145765	0.0383216	-0.354621	-0.275013	0.990926	0.451338	0		2	stabilized
Q8TCS8	Polyribonucleotide nucleotidyltransferase 1, mitochondrial OS=Homo sapiens OX=9606 GN=PNPT1 PE=1 SV=2	PNPT1	0.0383513	0.0240443	0.0218817	-0.354526	-0.275013	0.679965	0.641401	0		2	stabilized
P49419	Alpha-aminoadipic semialdehyde dehydrogenase OS=Homo sapiens OX=9606 GN=ALDH7A1 PE=1 SV=5	ALDH7A1	-0.00746967	0.0340164	0.00928542	-0.348581	-0.271069	0.548735	0.80607	0		2	stabilized
P07900	Heat shock protein HSP 90-alpha OS=Homo sapiens OX=9606 GN=HSP90AA1 PE=1 SV=5	HSP90AA1	0.0258692	0.0309174	0.0132825	-0.348256	-0.27106	0.588165	0.752468	0		2	stabilized
Q08945	FACT complex subunit SSRP1 OS=Homo sapiens OX=9606 GN=SSRP1 PE=1 SV=1	SSRP1	-0.0285084	0.00776615	0.0352395	-0.348058	-0.27106	0.914774	0.484367	0		2	stabilized
P22234	Multifunctional protein ADE2 OS=Homo sapiens OX=9606 GN=PAICS PE=1 SV=3	PAICS	-0.031366	0.0319362	0.0109409	-0.340452	-0.265035	0.575058	0.783743	0		2	stabilized
Q99543	DnaJ homolog subfamily C member 2 OS=Homo sapiens OX=9606 GN=DNAJC2 PE=1 SV=4	DNAJC2	0.00390389	0.0326877	0.00985978	-0.339778	-0.264613	0.565481	0.798305	0		2	stabilized
P47756	F-actin-capping protein subunit beta OS=Homo sapiens OX=9606 GN=CAPZB PE=1 SV=4	CAPZB	0.0204146	0.0160363	0.0277585	-0.339359	-0.264363	0.793148	0.5697	0		2	stabilized
O15400	Syntaxin-7 OS=Homo sapiens OX=9606 GN=STX7 PE=1 SV=4	STX7	-0.0425317	0.0145318	0.0288476	-0.337519	-0.262664	0.814993	0.556843	0		2	stabilized
O76031	ATP-dependent Clp protease ATP-binding subunit clpX-like, mitochondrial OS=Homo sapiens OX=9606 GN=CLPX PE=1 SV=2	CLPX	0.0126168	0.00297777	0.0372355	-0.335371	-0.261607	0.986313	0.462829	0		2	stabilized
Q8N6M0	Deubiquitinase OTUD6B OS=Homo sapiens OX=9606 GN=OTUD6B PE=1 SV=1	OTUD6B	0.0191179	0.0174345	0.0260033	-0.334814	-0.2615	0.772991	0.590712	0		2	stabilized
P46108	Adapter molecule crk OS=Homo sapiens OX=9606 GN=CRK PE=1 SV=2	CRK	7.50621e-05	0.0172305	0.0261682	-0.33464	-0.261465	0.775923	0.588723	0		2	stabilized
P46734	Dual specificity mitogen-activated protein kinase kinase 3 OS=Homo sapiens OX=9606 GN=MAP2K3 PE=1 SV=2	MAP2K3	-0.0074207	0.0205854	0.0229168	-0.333806	-0.261191	0.728143	0.6285	0		2	stabilized
O43772	Mitochondrial carnitine/acylcarnitine carrier protein OS=Homo sapiens OX=9606 GN=SLC25A20 PE=1 SV=1	SLC25A20	0.0308697	0.0279236	0.0149331	-0.333038	-0.261069	0.627454	0.730661	0		2	stabilized
O60832	H/ACA ribonucleoprotein complex subunit DKC1 OS=Homo sapiens OX=9606 GN=DKC1 PE=1 SV=3	DKC1	0.0887382	0.0145091	0.0283672	-0.332987	-0.261069	0.815324	0.562496	0		2	stabilized
O95336	6-phosphogluconolactonase OS=Homo sapiens OX=9606 GN=PGLS PE=1 SV=2	PGLS	-0.0316911	0.0223078	0.0207646	-0.33023	-0.258731	0.704004	0.655447	0		2	stabilized
P29966	Myristoylated alanine-rich C-kinase substrate OS=Homo sapiens OX=9606 GN=MARCKS PE=1 SV=4	MARCKS	-0.143976	0.0274501	0.0149243	-0.328653	-0.257849	0.63377	0.730777	0		2	stabilized
Q92793	CREB-binding protein OS=Homo sapiens OX=9606 GN=CREBBP PE=1 SV=3	CREBBP	0.11667	0.0068579	0.033819	-0.328018	-0.257697	0.928308	0.500019	0		2	stabilized
Q13586	Stromal interaction molecule 1 OS=Homo sapiens OX=9606 GN=STIM1 PE=1 SV=3	STIM1	-0.147835	0.0278561	0.0140288	-0.325453	-0.256038	0.628354	0.742583	0		2	stabilized
Q9HBH5	Retinol dehydrogenase 14 OS=Homo sapiens OX=9606 GN=RDH14 PE=1 SV=1	RDH14	0.0184365	0.0344158	0.00521714	-0.323884	-0.255346	0.543751	0.861577	0		2	stabilized
Q96B26	Exosome complex component RRP43 OS=Homo sapiens OX=9606 GN=EXOSC8 PE=1 SV=1	EXOSC8	0.0609826	0.0155437	0.026416	-0.323531	-0.255224	0.800283	0.585739	0		2	stabilized
Q9Y295	Developmentally-regulated GTP-binding protein 1 OS=Homo sapiens OX=9606 GN=DRG1 PE=1 SV=1	DRG1	0.0110626	0.0321795	0.00812359	-0.322377	-0.254346	0.571948	0.821835	0		2	stabilized
O15211	Ral guanine nucleotide dissociation stimulator-like 2 OS=Homo sapiens OX=9606 GN=RGL2 PE=1 SV=1	RGL2	-0.0130252	0.008546	0.0317814	-0.320469	-0.25299	0.903173	0.522932	0		2	stabilized
Q8NBF6	Late secretory pathway protein AVL9 homolog OS=Homo sapiens OX=9606 GN=AVL9 PE=1 SV=1	AVL9	-0.061968	0.0304898	0.00988203	-0.318931	-0.251866	0.593707	0.798004	0		2	stabilized
O95340	Bifunctional 3'-phosphoadenosine 5'-phosphosulfate synthase 2 OS=Homo sapiens OX=9606 GN=PAPSS2 PE=1 SV=2	PAPSS2	-0.00191856	0.0289599	0.0113208	-0.315197	-0.249164	0.613727	0.778644	0		2	stabilized
P19623	Spermidine synthase OS=Homo sapiens OX=9606 GN=SRM PE=1 SV=1	SRM	-0.0747636	0.0146662	0.0260635	-0.313615	-0.248201	0.813036	0.589985	0		2	stabilized
O00186	Syntaxin-binding protein 3 OS=Homo sapiens OX=9606 GN=STXBP3 PE=1 SV=2	STXBP3	0.0488311	0.033187	0.00537931	-0.31294	-0.247684	0.559159	0.859349	0		2	stabilized
Q9P287	BRCA2 and CDKN1A-interacting protein OS=Homo sapiens OX=9606 GN=BCCIP PE=1 SV=1	BCCIP	0.0587103	0.0276607	0.0121122	-0.309154	-0.244838	0.630958	0.768052	0		2	stabilized
Q9H3S7	Tyrosine-protein phosphatase non-receptor type 23 OS=Homo sapiens OX=9606 GN=PTPN23 PE=1 SV=1	PTPN23	-0.0346973	0.0248316	0.0153969	-0.308899	-0.24472	0.669172	0.724571	0		2	stabilized
P36776	Lon protease homolog, mitochondrial OS=Homo sapiens OX=9606 GN=LONP1 PE=1 SV=2	LONP1	0.0232423	0.0116026	0.0280299	-0.308039	-0.24427	0.857924	0.566482	0		2	stabilized
Q9Y266	Nuclear migration protein nudC OS=Homo sapiens OX=9606 GN=NUDC PE=1 SV=1	NUDC	-0.00195188	0.015368	0.02473	-0.307373	-0.243878	0.802832	0.606175	0		2	stabilized
Q92551	Inositol hexakisphosphate kinase 1 OS=Homo sapiens OX=9606 GN=IP6K1 PE=1 SV=3	IP6K1	-0.0592683	0.0327593	0.00512544	-0.307042	-0.24382	0.564571	0.862837	0		2	stabilized
O15305	Phosphomannomutase 2 OS=Homo sapiens OX=9606 GN=PMM2 PE=1 SV=1	PMM2	-0.0400271	0.0352941	0.00135664	-0.306803	-0.243718	0.532867	0.914894	0		2	stabilized
P42566	Epidermal growth factor receptor substrate 15 OS=Homo sapiens OX=9606 GN=EPS15 PE=1 SV=2	EPS15	0.00184789	0.00354419	0.0335915	-0.303515	-0.241577	0.977833	0.502551	0		2	stabilized
Q9BU61	NADH dehydrogenase [ubiquinone] 1 alpha subcomplex assembly factor 3 OS=Homo sapiens OX=9606 GN=NDUFAF3 PE=1 SV=1	NDUFAF3	0.0403429	0.0183586	0.0209663	-0.299094	-0.238325	0.759751	0.652902	0		2	stabilized
P14735	Insulin-degrading enzyme OS=Homo sapiens OX=9606 GN=IDE PE=1 SV=4	IDE	0.0543759	0.0196308	0.0195235	-0.297571	-0.237497	0.74164	0.671196	0		2	stabilized
P52566	Rho GDP-dissociation inhibitor 2 OS=Homo sapiens OX=9606 GN=ARHGDIB PE=1 SV=3	ARHGDIB	0.0946497	0.025917	0.0123511	-0.295217	-0.236076	0.654402	0.764862	0		2	stabilized
Q9H9B4	Sideroflexin-1 OS=Homo sapiens OX=9606 GN=SFXN1 PE=1 SV=4	SFXN1	-0.0200609	0.00637722	0.0306531	-0.294835	-0.235829	0.935479	0.535847	0		2	stabilized
Q9NYU2	UDP-glucose:glycoprotein glucosyltransferase 1 OS=Homo sapiens OX=9606 GN=UGGT1 PE=1 SV=3	UGGT1	0.00248476	0.014071	0.0243715	-0.294263	-0.235392	0.821713	0.61056	0		2	stabilized
P37837	Transaldolase OS=Homo sapiens OX=9606 GN=TALDO1 PE=1 SV=2	TALDO1	-0.0137425	0.0302972	0.00602324	-0.289702	-0.231507	0.59621	0.850515	0		2	stabilized
P50995	Annexin A11 OS=Homo sapiens OX=9606 GN=ANXA11 PE=1 SV=1	ANXA11	-0.0227812	0.0308286	0.00514017	-0.288636	-0.230577	0.589313	0.862635	0		2	stabilized
O94979	Protein transport protein Sec31A OS=Homo sapiens OX=9606 GN=SEC31A PE=1 SV=3	SEC31A	-0.057721	0.0166585	0.0212615	-0.287942	-0.230017	0.784161	0.649184	0		2	stabilized
O60333	Kinesin-like protein KIF1B OS=Homo sapiens OX=9606 GN=KIF1B PE=1 SV=5	KIF1B	-0.0322085	0.00424478	0.0312713	-0.286199	-0.228447	0.967349	0.528751	0		2	stabilized
P49748	Very long-chain specific acyl-CoA dehydrogenase, mitochondrial OS=Homo sapiens OX=9606 GN=ACADVL PE=1 SV=1	ACADVL	-0.0312361	0.0249282	0.012032	-0.284056	-0.227345	0.667851	0.769123	0		2	stabilized
Q8IUD2	ELKS/Rab6-interacting/CAST family member 1 OS=Homo sapiens OX=9606 GN=ERC1 PE=1 SV=1	ERC1	-0.0335158	0.023912	0.0130142	-0.282548	-0.226375	0.681786	0.756032	0		2	stabilized
Q08J23	RNA cytosine C(5)-methyltransferase NSUN2 OS=Homo sapiens OX=9606 GN=NSUN2 PE=1 SV=2	NSUN2	0.0457907	0.0254581	0.0108769	-0.280164	-0.224628	0.66063	0.784603	0		2	stabilized
Q8WX92	Negative elongation factor B OS=Homo sapiens OX=9606 GN=NELFB PE=1 SV=1	NELFB	0.0572056	0.0299486	0.00493424	-0.278931	-0.223853	0.600754	0.865466	0		2	stabilized
P11172	Uridine 5'-monophosphate synthase OS=Homo sapiens OX=9606 GN=UMPS PE=1 SV=1	UMPS	0.0145122	0.0180342	0.0188025	-0.278683	-0.223853	0.764391	0.680411	0		2	stabilized
Q5VW32	BRO1 domain-containing protein BROX OS=Homo sapiens OX=9606 GN=BROX PE=1 SV=1	BROX	0.0556395	0.0307691	0.0037376	-0.278549	-0.223853	0.590084	0.88195	0		2	stabilized
Q9ULA0	Aspartyl aminopeptidase OS=Homo sapiens OX=9606 GN=DNPEP PE=1 SV=1	DNPEP	-0.110747	0.00220046	0.0310151	-0.27043	-0.217605	0.997951	0.531687	0		2	stabilized
P22102	Trifunctional purine biosynthetic protein adenosine-3 OS=Homo sapiens OX=9606 GN=GART PE=1 SV=1	GART	-0.0152624	0.0111248	0.0239119	-0.268223	-0.215532	0.86497	0.616204	0		2	stabilized
Q9H5N1	Rab GTPase-binding effector protein 2 OS=Homo sapiens OX=9606 GN=RABEP2 PE=1 SV=2	RABEP2	-0.0626619	0.0183168	0.0171257	-0.267486	-0.214928	0.760349	0.702028	0		2	stabilized
P22314	Ubiquitin-like modifier-activating enzyme 1 OS=Homo sapiens OX=9606 GN=UBA1 PE=1 SV=3	UBA1	0.0152326	0.0311732	0.00125726	-0.26597	-0.213812	0.584861	0.916273	0		2	stabilized
Q8NBQ5	Estradiol 17-beta-dehydrogenase 11 OS=Homo sapiens OX=9606 GN=HSD17B11 PE=1 SV=3	HSD17B11	-0.0681061	0.00142273	0.0288951	-0.263582	-0.211956	0.990403	0.556286	0		2	stabilized
P50991	T-complex protein 1 subunit delta OS=Homo sapiens OX=9606 GN=CCT4 PE=1 SV=4	CCT4	-0.019193	0.0218844	0.0125904	-0.261924	-0.211032	0.709911	0.761673	0		2	stabilized
P08047	Transcription factor Sp1 OS=Homo sapiens OX=9606 GN=SP1 PE=1 SV=3	SP1	0.124797	0.0181711	0.0165192	-0.261497	-0.210935	0.762432	0.709909	0		2	stabilized
P36542	ATP synthase subunit gamma, mitochondrial OS=Homo sapiens OX=9606 GN=ATP5F1C PE=1 SV=1	ATP5F1C	0.0551705	0.00122041	0.028484	-0.261148	-0.21092	0.987374	0.56112	0		2	stabilized
P21953	2-oxoisovalerate dehydrogenase subunit beta, mitochondrial OS=Homo sapiens OX=9606 GN=BCKDHB PE=1 SV=2	BCKDHB	0.0153721	0.0295147	0.00286978	-0.260952	-0.21092	0.606432	0.893937	0		2	stabilized
Q86TU7	Actin-histidine N-methyltransferase OS=Homo sapiens OX=9606 GN=SETD3 PE=1 SV=1	SETD3	0.0298782	0.0189317	0.0154582	-0.259343	-0.209804	0.751575	0.723767	0		2	stabilized
Q96RU3	Formin-binding protein 1 OS=Homo sapiens OX=9606 GN=FNBP1 PE=1 SV=2	FNBP1	-0.0428712	0.0179621	0.0163492	-0.258468	-0.209231	0.765423	0.712123	0		2	stabilized
P20810	Calpastatin OS=Homo sapiens OX=9606 GN=CAST PE=1 SV=4	CAST	-0.0326296	0.0274922	0.00509709	-0.257348	-0.208243	0.633207	0.863227	0		2	stabilized
O43847	Nardilysin OS=Homo sapiens OX=9606 GN=NRDC PE=1 SV=3	NRDC	0.0767745	0.0257385	0.00724211	-0.256457	-0.207698	0.656821	0.833845	0		2	stabilized
Q15366	Poly(rC)-binding protein 2 OS=Homo sapiens OX=9606 GN=PCBP2 PE=1 SV=1	PCBP2	0.101585	0.0141698	0.0197956	-0.256417	-0.207698	0.820271	0.66773	0		2	stabilized
O95163	Elongator complex protein 1 OS=Homo sapiens OX=9606 GN=ELP1 PE=1 SV=3	ELP1	-0.0633143	0.0189906	0.0149416	-0.255805	-0.207493	0.750738	0.730548	0		2	stabilized
P62258	14-3-3 protein epsilon OS=Homo sapiens OX=9606 GN=YWHAE PE=1 SV=1	YWHAE	0.0262566	0.00331028	0.0284737	-0.254282	-0.20663	0.981335	0.561242	0		2	stabilized
Q16537	Serine/threonine-protein phosphatase 2A 56 kDa regulatory subunit epsilon isoform OS=Homo sapiens OX=9606 GN=PPP2R5E PE=1 SV=1	PPP2R5E	0.0408923	0.024887	0.00769364	-0.252102	-0.204713	0.668414	0.827688	0		2	stabilized
O95140	Mitofusin-2 OS=Homo sapiens OX=9606 GN=MFN2 PE=1 SV=3	MFN2	-0.0525139	0.0201647	0.0129012	-0.249844	-0.202719	0.734081	0.757534	0		2	stabilized
P31930	Cytochrome b-c1 complex subunit 1, mitochondrial OS=Homo sapiens OX=9606 GN=UQCRC1 PE=1 SV=3	UQCRC1	0.0730701	0.00695106	0.0248732	-0.246801	-0.200597	0.926919	0.604426	0		2	stabilized
O94925	Glutaminase kidney isoform, mitochondrial OS=Homo sapiens OX=9606 GN=GLS PE=1 SV=1	GLS	-0.0416381	0.00938108	0.0223648	-0.242365	-0.19708	0.890773	0.635367	0		2	stabilized
Q9UNN5	FAS-associated factor 1 OS=Homo sapiens OX=9606 GN=FAF1 PE=1 SV=2	FAF1	-0.0844821	0.0213306	0.0105661	-0.24218	-0.197026	0.717665	0.788783	0		2	stabilized
Q16540	39S ribosomal protein L23, mitochondrial OS=Homo sapiens OX=9606 GN=MRPL23 PE=1 SV=1	MRPL23	-0.109493	0.00286149	0.0272919	-0.240705	-0.196598	0.988054	0.57525	0		2	stabilized
Q86W50	RNA N6-adenosine-methyltransferase METTL16 OS=Homo sapiens OX=9606 GN=METTL16 PE=1 SV=2	METTL16	0.210843	0.0287518	0.000764253	-0.240052	-0.196207	0.616473	0.923116	0		2	stabilized
P42167	Lamina-associated polypeptide 2, isoforms beta/gamma OS=Homo sapiens OX=9606 GN=TMPO PE=1 SV=2	TMPO	-0.0549115	0.0207257	0.0107275	-0.238292	-0.19523	0.726165	0.786611	0		2	stabilized
P60842	Eukaryotic initiation factor 4A-I OS=Homo sapiens OX=9606 GN=EIF4A1 PE=1 SV=1	EIF4A1	0.0435064	0.0135278	0.0180227	-0.237105	-0.194826	0.829652	0.690433	0		2	stabilized
P28331	NADH-ubiquinone oxidoreductase 75 kDa subunit, mitochondrial OS=Homo sapiens OX=9606 GN=NDUFS1 PE=1 SV=3	NDUFS1	0.00985404	0.0209719	0.00995155	-0.234666	-0.19304	0.722701	0.797066	0		2	stabilized
Q15181	Inorganic pyrophosphatase OS=Homo sapiens OX=9606 GN=PPA1 PE=1 SV=2	PPA1	0.00436183	0.0141234	0.0171251	-0.234459	-0.19304	0.820949	0.702036	0		2	stabilized
P31150	Rab GDP dissociation inhibitor alpha OS=Homo sapiens OX=9606 GN=GDI1 PE=1 SV=2	GDI1	-0.0169958	0.0188792	0.012089	-0.233152	-0.192433	0.752323	0.768362	0		2	stabilized
Q13347	Eukaryotic translation initiation factor 3 subunit I OS=Homo sapiens OX=9606 GN=EIF3I PE=1 SV=1	EIF3I	0.00574318	0.00703593	0.023096	-0.232061	-0.191601	0.925654	0.626279	0		2	stabilized
P23368	NAD-dependent malic enzyme, mitochondrial OS=Homo sapiens OX=9606 GN=ME2 PE=1 SV=1	ME2	0.032221	0.0181016	0.0127197	-0.231582	-0.191289	0.763427	0.75995	0		2	stabilized
P54136	Arginine--tRNA ligase, cytoplasmic OS=Homo sapiens OX=9606 GN=RARS PE=1 SV=2	RARS	0.00328767	0.0250407	0.00451061	-0.23136	-0.191289	0.666315	0.871295	0		2	stabilized
Q14566	DNA replication licensing factor MCM6 OS=Homo sapiens OX=9606 GN=MCM6 PE=1 SV=1	MCM6	0.0188941	0.0216527	0.00851844	-0.230043	-0.190356	0.713151	0.816469	0		2	stabilized
O43143	Pre-mRNA-splicing factor ATP-dependent RNA helicase DHX15 OS=Homo sapiens OX=9606 GN=DHX15 PE=1 SV=2	DHX15	0.027793	0.00826656	0.0217602	-0.229343	-0.190048	0.907328	0.642924	0		2	stabilized
Q9HAS0	Protein Njmu-R1 OS=Homo sapiens OX=9606 GN=C17orf75 PE=1 SV=2	C17orf75	-0.0260527	0.0048559	0.0242398	-0.227029	-0.188251	0.958208	0.612176	0		2	stabilized
P56192	Methionine--tRNA ligase, cytoplasmic OS=Homo sapiens OX=9606 GN=MARS PE=1 SV=2	MARS	-0.0473723	0.0119246	0.0179275	-0.2243	-0.186297	0.853181	0.691661	0		2	stabilized
O14908	PDZ domain-containing protein GIPC1 OS=Homo sapiens OX=9606 GN=GIPC1 PE=1 SV=2	GIPC1	-0.0244435	0.0156464	0.013862	-0.220757	-0.183724	0.798795	0.744789	0		2	stabilized
Q13724	Mannosyl-oligosaccharide glucosidase OS=Homo sapiens OX=9606 GN=MOGS PE=1 SV=5	MOGS	0.0505041	0.00767779	0.021222	-0.220697	-0.183724	0.91609	0.649681	0		2	stabilized
O15541	E3 ubiquitin-protein ligase RNF113A OS=Homo sapiens OX=9606 GN=RNF113A PE=1 SV=1	RNF113A	-0.0854703	0.00229116	0.0246811	-0.213972	-0.178796	0.996593	0.606772	0		2	stabilized
P22307	Non-specific lipid-transfer protein OS=Homo sapiens OX=9606 GN=SCP2 PE=1 SV=2	SCP2	-0.151384	0.00391572	0.0233007	-0.212682	-0.177763	0.972273	0.623745	0		2	stabilized
P54619	5'-AMP-activated protein kinase subunit gamma-1 OS=Homo sapiens OX=9606 GN=PRKAG1 PE=1 SV=1	PRKAG1	-0.0941815	0.0199059	0.00756618	-0.208648	-0.174368	0.737742	0.829425	0		2	stabilized
Q96RP9	Elongation factor G, mitochondrial OS=Homo sapiens OX=9606 GN=GFM1 PE=1 SV=2	GFM1	0.0431032	0.0079996	0.0193859	-0.20777	-0.173617	0.911299	0.67295	0		2	stabilized
Q16181	Septin-7 OS=Homo sapiens OX=9606 GN=SEPTIN7 PE=1 SV=2	SEPTIN7	-0.0204391	0.0162928	0.0111464	-0.205381	-0.171484	0.78944	0.780984	0		2	stabilized
Q5VTR2	E3 ubiquitin-protein ligase BRE1A OS=Homo sapiens OX=9606 GN=RNF20 PE=1 SV=2	RNF20	-0.0140339	0.00557879	0.0209185	-0.203708	-0.170195	0.947403	0.653504	0		2	stabilized
P54709	Sodium/potassium-transporting ATPase subunit beta-3 OS=Homo sapiens OX=9606 GN=ATP1B3 PE=1 SV=1	ATP1B3	0.0139868	0.0178834	0.00911496	-0.203206	-0.169948	0.766552	0.808378	0		2	stabilized
P15529	Membrane cofactor protein OS=Homo sapiens OX=9606 GN=CD46 PE=1 SV=3	CD46	0.0237064	0.0239311	0.00163824	-0.202454	-0.169324	0.681523	0.910989	0		2	stabilized
P52292	Importin subunit alpha-1 OS=Homo sapiens OX=9606 GN=KPNA2 PE=1 SV=1	KPNA2	0.00370207	0.00215144	0.0233577	-0.201648	-0.168892	0.998685	0.623039	0		2	stabilized
P14625	Endoplasmin OS=Homo sapiens OX=9606 GN=HSP90B1 PE=1 SV=1	HSP90B1	-0.0408216	0.0238482	0.00155123	-0.201163	-0.168614	0.682665	0.912195	0		2	stabilized
P48059	LIM and senescent cell antigen-like-containing domain protein 1 OS=Homo sapiens OX=9606 GN=LIMS1 PE=1 SV=4	LIMS1	-0.0264723	0.0232317	0.00232718	-0.200919	-0.168553	0.691176	0.901444	0		2	stabilized
Q00587	Cdc42 effector protein 1 OS=Homo sapiens OX=9606 GN=CDC42EP1 PE=1 SV=1	CDC42EP1	-0.0038675	0.0118588	0.0148311	-0.199366	-0.167381	0.854151	0.732002	0		2	stabilized
P31040	Succinate dehydrogenase [ubiquinone] flavoprotein subunit, mitochondrial OS=Homo sapiens OX=9606 GN=SDHA PE=1 SV=2	SDHA	0.041711	0.00725121	0.0189162	-0.198706	-0.166976	0.922445	0.678955	0		2	stabilized
Q9Y2S7	Polymerase delta-interacting protein 2 OS=Homo sapiens OX=9606 GN=POLDIP2 PE=1 SV=1	POLDIP2	-0.0592004	0.000922502	0.0209484	-0.19682	-0.165979	0.982914	0.653128	0		2	stabilized
O94906	Pre-mRNA-processing factor 6 OS=Homo sapiens OX=9606 GN=PRPF6 PE=1 SV=1	PRPF6	0.0417274	0.00221403	0.0225381	-0.195062	-0.164925	0.997748	0.633207	0		2	stabilized
Q9UKM9	RNA-binding protein Raly OS=Homo sapiens OX=9606 GN=RALY PE=1 SV=1	RALY	-0.124193	0.00616269	0.0192165	-0.193647	-0.164072	0.938682	0.675114	0		2	stabilized
P51858	Hepatoma-derived growth factor OS=Homo sapiens OX=9606 GN=HDGF PE=1 SV=1	HDGF	-0.0427711	0.013283	0.0123908	-0.191409	-0.162355	0.833236	0.764334	0		2	stabilized
P40926	Malate dehydrogenase, mitochondrial OS=Homo sapiens OX=9606 GN=MDH2 PE=1 SV=3	MDH2	0.0709017	0.023304	0.000760657	-0.191298	-0.162355	0.690176	0.923166	0		2	stabilized
P42285	Exosome RNA helicase MTR4 OS=Homo sapiens OX=9606 GN=MTREX PE=1 SV=3	MTREX	-0.0227357	0.0129198	0.0125314	-0.189725	-0.16116	0.838559	0.762459	0		2	stabilized
P29317	Ephrin type-A receptor 2 OS=Homo sapiens OX=9606 GN=EPHA2 PE=1 SV=2	EPHA2	0.0125606	0.0125017	0.0124745	-0.186155	-0.158095	0.844696	0.763217	0		2	stabilized
P52306	Rap1 GTPase-GDP dissociation stimulator 1 OS=Homo sapiens OX=9606 GN=RAP1GDS1 PE=1 SV=3	RAP1GDS1	-0.0592039	0.0173447	0.00722468	-0.185397	-0.157588	0.774282	0.834083	0		2	stabilized
P52209	6-phosphogluconate dehydrogenase, decarboxylating OS=Homo sapiens OX=9606 GN=PGD PE=1 SV=3	PGD	0.0138744	0.0186126	0.00570158	-0.184996	-0.157313	0.756125	0.854926	0		2	stabilized
O95819	Mitogen-activated protein kinase kinase kinase kinase 4 OS=Homo sapiens OX=9606 GN=MAP4K4 PE=1 SV=2	MAP4K4	-0.0471981	0.0109267	0.0137461	-0.184138	-0.156582	0.867895	0.746323	0		2	stabilized
Q8N7H5	RNA polymerase II-associated factor 1 homolog OS=Homo sapiens OX=9606 GN=PAF1 PE=1 SV=2	PAF1	-0.00610686	0.0192642	0.00472975	-0.183646	-0.156341	0.746845	0.868279	0		2	stabilized
Q9BYD6	39S ribosomal protein L1, mitochondrial OS=Homo sapiens OX=9606 GN=MRPL1 PE=1 SV=2	MRPL1	0.00337737	0.00318723	0.0203602	-0.183131	-0.156078	0.983177	0.660561	0		2	stabilized
O60313	Dynamin-like 120 kDa protein, mitochondrial OS=Homo sapiens OX=9606 GN=OPA1 PE=1 SV=3	OPA1	-0.00035217	0.00164324	0.0198682	-0.182979	-0.156051	0.993705	0.666807	0		2	stabilized
P68036	Ubiquitin-conjugating enzyme E2 L3 OS=Homo sapiens OX=9606 GN=UBE2L3 PE=1 SV=1	UBE2L3	0.0307883	0.0132016	0.0110123	-0.180511	-0.154211	0.834429	0.782784	0		2	stabilized
Q13564	NEDD8-activating enzyme E1 regulatory subunit OS=Homo sapiens OX=9606 GN=NAE1 PE=1 SV=1	NAE1	-0.0745371	0.0132252	0.0106857	-0.17828	-0.152231	0.834082	0.787173	0		2	stabilized
P07384	Calpain-1 catalytic subunit OS=Homo sapiens OX=9606 GN=CAPN1 PE=1 SV=1	CAPN1	-0.0364993	0.000403763	0.0182065	-0.177532	-0.151735	0.975149	0.688066	0		2	stabilized
P60660	Myosin light polypeptide 6 OS=Homo sapiens OX=9606 GN=MYL6 PE=1 SV=2	MYL6	-0.0400224	0.00481836	0.0182736	-0.176878	-0.151331	0.95877	0.687203	0		2	stabilized
Q9ULX3	RNA-binding protein NOB1 OS=Homo sapiens OX=9606 GN=NOB1 PE=1 SV=1	NOB1	0.0313018	0.0164263	0.00678849	-0.175028	-0.149731	0.787511	0.840041	0		2	stabilized
Q9UL15	BAG family molecular chaperone regulator 5 OS=Homo sapiens OX=9606 GN=BAG5 PE=1 SV=1	BAG5	-0.0823453	0.00036652	0.017058	-0.16846	-0.144539	0.974592	0.702907	0		2	stabilized
Q15750	TGF-beta-activated kinase 1 and MAP3K7-binding protein 1 OS=Homo sapiens OX=9606 GN=TAB1 PE=1 SV=1	TAB1	0.0215043	0.0033459	0.0180088	-0.164969	-0.142028	0.980802	0.690612	0		2	stabilized
Q03154	Aminoacylase-1 OS=Homo sapiens OX=9606 GN=ACY1 PE=1 SV=1	ACY1	-0.0447568	0.0116187	0.0105082	-0.164951	-0.142028	0.857686	0.789563	0		2	stabilized
P43686	26S proteasome regulatory subunit 6B OS=Homo sapiens OX=9606 GN=PSMC4 PE=1 SV=2	PSMC4	0.0353939	0.00251841	0.0183861	-0.162615	-0.140023	0.993191	0.685757	0		2	stabilized
Q96DB5	Regulator of microtubule dynamics protein 1 OS=Homo sapiens OX=9606 GN=RMDN1 PE=1 SV=1	RMDN1	-0.0842866	0.0168431	0.00439928	-0.161839	-0.139413	0.781499	0.872828	0		2	stabilized
Q9NPD8	Ubiquitin-conjugating enzyme E2 T OS=Homo sapiens OX=9606 GN=UBE2T PE=1 SV=1	UBE2T	-0.0549013	0.00963469	0.0119365	-0.161064	-0.138832	0.887012	0.770399	0		2	stabilized
Q86Y82	Syntaxin-12 OS=Homo sapiens OX=9606 GN=STX12 PE=1 SV=1	STX12	-0.124419	0.000597903	0.0163083	-0.160887	-0.138832	0.978055	0.712656	0		2	stabilized
P52789	Hexokinase-2 OS=Homo sapiens OX=9606 GN=HK2 PE=1 SV=2	HK2	0.0287404	0.0112856	0.00993878	-0.158321	-0.137013	0.862598	0.797238	0		2	stabilized
Q9H4M9	EH domain-containing protein 1 OS=Homo sapiens OX=9606 GN=EHD1 PE=1 SV=2	EHD1	0.00702603	0.0151556	0.00496393	-0.152426	-0.132734	0.805918	0.865058	0		2	stabilized
P54577	Tyrosine--tRNA ligase, cytoplasmic OS=Homo sapiens OX=9606 GN=YARS PE=1 SV=4	YARS	-0.0349281	0.0111688	0.00819817	-0.144894	-0.126801	0.864322	0.820821	0		2	stabilized
Q9UI30	Multifunctional methyltransferase subunit TRM112-like protein OS=Homo sapiens OX=9606 GN=TRMT112 PE=1 SV=1	TRMT112	-0.0824435	0.00147324	0.0144129	-0.140075	-0.122843	0.99116	0.737511	0		2	stabilized
Q9NQR4	Omega-amidase NIT2 OS=Homo sapiens OX=9606 GN=NIT2 PE=1 SV=1	NIT2	-0.0550556	0.0103747	0.00813768	-0.138653	-0.12179	0.876054	0.821644	0		2	stabilized
Q99497	Protein/nucleic acid deglycase DJ-1 OS=Homo sapiens OX=9606 GN=PARK7 PE=1 SV=2	PARK7	-0.0645834	0.00494005	0.0128874	-0.135547	-0.119665	0.95695	0.757719	0		2	stabilized
Q9NUW8	Tyrosyl-DNA phosphodiesterase 1 OS=Homo sapiens OX=9606 GN=TDP1 PE=1 SV=2	TDP1	-0.0381879	0.00743119	0.00997955	-0.13098	-0.116023	0.919763	0.796688	0		2	stabilized
Q9H553	Alpha-1,3/1,6-mannosyltransferase ALG2 OS=Homo sapiens OX=9606 GN=ALG2 PE=1 SV=1	ALG2	-0.0259837	0.01025	0.00656868	-0.126661	-0.112492	0.877899	0.843047	0		2	stabilized
Q13451	Peptidyl-prolyl cis-trans isomerase FKBP5 OS=Homo sapiens OX=9606 GN=FKBP5 PE=1 SV=2	FKBP5	-0.0297793	0.0132137	0.00329238	-0.126206	-0.112223	0.834251	0.888097	0		2	stabilized
Q5HYK3	2-methoxy-6-polyprenyl-1,4-benzoquinol methylase, mitochondrial OS=Homo sapiens OX=9606 GN=COQ5 PE=1 SV=2	COQ5	-0.034384	0.00100182	0.0122006	-0.126149	-0.112223	0.984101	0.766871	0		2	stabilized
Q2NL82	Pre-rRNA-processing protein TSR1 homolog OS=Homo sapiens OX=9606 GN=TSR1 PE=1 SV=1	TSR1	0.0510247	0.00726674	0.00911419	-0.123546	-0.110011	0.922213	0.808389	0		2	stabilized
Q6PIU2	Neutral cholesterol ester hydrolase 1 OS=Homo sapiens OX=9606 GN=NCEH1 PE=1 SV=3	NCEH1	0.0282734	0.00967941	0.00599919	-0.118564	-0.106427	0.88635	0.850845	0		2	stabilized
Q9H2J4	Phosducin-like protein 3 OS=Homo sapiens OX=9606 GN=PDCL3 PE=1 SV=1	PDCL3	0.0269562	0.0034325	0.0105063	-0.107742	-0.0977031	0.979505	0.789589	0		2	stabilized
Q9BYV8	Centrosomal protein of 41 kDa OS=Homo sapiens OX=9606 GN=CEP41 PE=1 SV=1	CEP41	-0.0137292	0.0113272	0.00243869	-0.106418	-0.0966208	0.861984	0.899901	0		2	stabilized
Q9Y5K5	Ubiquitin carboxyl-terminal hydrolase isozyme L5 OS=Homo sapiens OX=9606 GN=UCHL5 PE=1 SV=3	UCHL5	0.00849974	0.00494842	0.00873839	-0.104968	-0.0954124	0.956825	0.813483	0		2	stabilized
P05455	Lupus La protein OS=Homo sapiens OX=9606 GN=SSB PE=1 SV=2	SSB	0.0264841	0.00556198	0.00766339	-0.101435	-0.0923618	0.947654	0.8281	0		2	stabilized
Q9Y6W5	Wiskott-Aldrich syndrome protein family member 2 OS=Homo sapiens OX=9606 GN=WASF2 PE=1 SV=3	WASF2	-0.13836	0.0068936	0.00389498	-0.084463	-0.077316	0.927776	0.879779	0		2	stabilized
Q7L8L6	FAST kinase domain-containing protein 5, mitochondrial OS=Homo sapiens OX=9606 GN=FASTKD5 PE=1 SV=1	FASTKD5	-0.0816578	0.00385943	0.00676726	-0.0836913	-0.0769044	0.973115	0.840331	0		2	stabilized
P53621	Coatomer subunit alpha OS=Homo sapiens OX=9606 GN=COPA PE=1 SV=2	COPA	-0.0134141	0.00700353	0.00360223	-0.0832501	-0.0765984	0.926137	0.883818	0		2	stabilized
Q14203	Dynactin subunit 1 OS=Homo sapiens OX=9606 GN=DCTN1 PE=1 SV=3	DCTN1	0.0195066	0.0100648	3.2011e-05	-0.0814876	-0.0751804	0.880641	0.933289	0		2	stabilized
P06737	Glycogen phosphorylase, liver form OS=Homo sapiens OX=9606 GN=PYGL PE=1 SV=4	PYGL	-0.0193169	0.00105582	0.00578959	-0.0789002	-0.0729525	0.98491	0.853719	0		2	stabilized
Q9Y5V0	Zinc finger protein 706 OS=Homo sapiens OX=9606 GN=ZNF706 PE=1 SV=1	ZNF706	0.0309878	0.00801024	0.00165574	-0.0773472	-0.071639	0.911141	0.910746	0		2	stabilized
Q4J6C6	Prolyl endopeptidase-like OS=Homo sapiens OX=9606 GN=PREPL PE=1 SV=1	PREPL	0.00883648	0.00410118	0.00492744	-0.072537	-0.0676659	0.969498	0.865559	0		2	stabilized
P07686	Beta-hexosaminidase subunit beta OS=Homo sapiens OX=9606 GN=HEXB PE=1 SV=3	HEXB	0.0289825	0.00576208	0.000221347	-0.0524493	-0.0491286	0.944664	0.930658	0		2	stabilized
Q96SZ6	CDK5 regulatory subunit-associated protein 1 OS=Homo sapiens OX=9606 GN=CDK5RAP1 PE=1 SV=2	CDK5RAP1	-0.03669	0.00335893	0.00190378	-0.0473119	-0.0444672	0.980606	0.907309	0		2	stabilized
Q96A65	Exocyst complex component 4 OS=Homo sapiens OX=9606 GN=EXOC4 PE=1 SV=1	EXOC4	-0.0587773	0.0010556	0.000809633	-0.0450326	-0.0424257	0.984907	0.922486	0		2	stabilized
O43913	Origin recognition complex subunit 5 OS=Homo sapiens OX=9606 GN=ORC5 PE=1 SV=1	ORC5	-0.0396971	0.00407328	0.00031332	-0.0416719	-0.0397775	0.969915	0.92938	0		2	stabilized
P51610	Host cell factor 1 OS=Homo sapiens OX=9606 GN=HCFC1 PE=1 SV=2	HCFC1	0.0372605	0.00229481	0.00147653	-0.0375609	-0.0360223	0.996539	0.913231	0		2	stabilized
P07814	Bifunctional glutamate/proline--tRNA ligase OS=Homo sapiens OX=9606 GN=EPRS PE=1 SV=5	EPRS	0.0396898	0.00250755	0.000281073	-0.0311732	-0.030227	0.993353	0.929828	0		2	stabilized
P47914	60S ribosomal protein L29 OS=Homo sapiens OX=9606 GN=RPL29 PE=1 SV=2	RPL29	0.215874	-0.270799	0.253391	-11.8319	-8.56757	3.0424e-07	6.37401e-06	2	Warning: high variance	0	undetermined
Q9UII2	ATPase inhibitor, mitochondrial OS=Homo sapiens OX=9606 GN=ATP5IF1 PE=1 SV=1	ATP5IF1	0.170943	-0.257077	0.121174	-7.55689	-4.94576	1.15458e-06	0.0276776	2	Warning: high variance	0	undetermined
P47712	Cytosolic phospholipase A2 OS=Homo sapiens OX=9606 GN=PLA2G4A PE=1 SV=2	PLA2G4A	-0.0279721	0.251794	-0.124586	-7.05548	-4.56083	2.77663e-06	0.0361539	2	Warning: high variance	0	undetermined
P62633	Cellular nucleic acid-binding protein OS=Homo sapiens OX=9606 GN=CNBP PE=1 SV=1	CNBP	0.177125	-0.199902	0.189084	-7.04703	-4.56083	0.000150472	0.000700971	2	Warning: high variance	0	undetermined
P23588	Eukaryotic translation initiation factor 4B OS=Homo sapiens OX=9606 GN=EIF4B PE=1 SV=2	EIF4B	0.068864	-0.188195	0.196416	-6.87781	-4.46092	0.000356198	0.000435775	2	Warning: high variance	0	undetermined
Q05655	Protein kinase C delta type OS=Homo sapiens OX=9606 GN=PRKCD PE=1 SV=2	PRKCD	-0.000279689	0.149657	-0.224021	-6.20985	-3.89975	0.00560755	0.000126193	2	Warning: high variance	0	undetermined
Q8NC51	Plasminogen activator inhibitor 1 RNA-binding protein OS=Homo sapiens OX=9606 GN=SERBP1 PE=1 SV=2	SERBP1	0.073159	-0.19577	0.124239	-5.35513	-3.16365	0.00020503	0.0241072	2	Warning: high variance	0	undetermined
P42677	40S ribosomal protein S27 OS=Homo sapiens OX=9606 GN=RPS27 PE=1 SV=3	RPS27	0.0709219	-0.150064	0.16371	-4.90644	-2.83242	0.00430403	0.00322373	2	Warning: high variance	0	undetermined
P13164	Interferon-induced transmembrane protein 1 OS=Homo sapiens OX=9606 GN=IFITM1 PE=1 SV=3	IFITM1	-0.0978273	0.126674	-0.192001	-4.7328	-2.71149	0.0193587	0.00106069	2	Warning: high variance	0	undetermined
P04792	Heat shock protein beta-1 OS=Homo sapiens OX=9606 GN=HSPB1 PE=1 SV=2	HSPB1	-0.0179003	-0.155011	0.133234	-4.33762	-2.4157	0.00320029	0.0158351	2	Warning: high variance	0	undetermined
Q969Q0	60S ribosomal protein L36a-like OS=Homo sapiens OX=9606 GN=RPL36AL PE=1 SV=3	RPL36AL	0.101271	-0.169306	0.112841	-4.327	-2.41502	0.00129954	0.0397694	2	Warning: high variance	0	undetermined
Q13442	28 kDa heat- and acid-stable phosphoprotein OS=Homo sapiens OX=9606 GN=PDAP1 PE=1 SV=1	PDAP1	0.121477	-0.160091	0.125477	-4.31461	-2.41502	0.00234112	0.0227827	2	Warning: high variance	0	undetermined
Q9BYC8	39S ribosomal protein L32, mitochondrial OS=Homo sapiens OX=9606 GN=MRPL32 PE=1 SV=1	MRPL32	0.0902585	-0.157218	0.124903	-4.2252	-2.35002	0.00279678	0.0233891	2	Warning: high variance	0	undetermined
Q96IZ0	PRKC apoptosis WT1 regulator protein OS=Homo sapiens OX=9606 GN=PAWR PE=1 SV=1	PAWR	0.182635	-0.113221	0.167701	-4.14599	-2.28818	0.0304995	0.00256698	2	Warning: high variance	0	undetermined
Q9BRS2	Serine/threonine-protein kinase RIO1 OS=Homo sapiens OX=9606 GN=RIOK1 PE=1 SV=2	RIOK1	0.0168907	-0.118141	0.155776	-3.95775	-2.20203	0.0240778	0.00500323	2	Warning: high variance	0	undetermined
Q15836	Vesicle-associated membrane protein 3 OS=Homo sapiens OX=9606 GN=VAMP3 PE=1 SV=3	VAMP3	-0.115037	0.115381	-0.170872	-3.94786	-2.20203	0.033451	0.00367869	2	Warning: high variance	0	undetermined
Q9BQ61	Telomerase RNA component interacting RNase OS=Homo sapiens OX=9606 GN=TRIR PE=1 SV=1	TRIR	0.00825145	-0.126275	0.143285	-3.84934	-2.12906	0.0160169	0.00964127	2	Warning: high variance	0	undetermined
Q92530	Proteasome inhibitor PI31 subunit OS=Homo sapiens OX=9606 GN=PSMF1 PE=1 SV=2	PSMF1	0.116775	-0.108783	0.156127	-3.77132	-2.06135	0.0375027	0.00490867	2	Warning: high variance	0	undetermined
Q9NZZ3	Charged multivesicular body protein 5 OS=Homo sapiens OX=9606 GN=CHMP5 PE=1 SV=1	CHMP5	0.0592773	-0.114641	0.143681	-3.60499	-1.95726	0.0285104	0.00944918	2	Warning: high variance	0	undetermined
O75347	Tubulin-specific chaperone A OS=Homo sapiens OX=9606 GN=TBCA PE=1 SV=3	TBCA	0.093469	-0.104034	0.146321	-3.44961	-1.86975	0.0464669	0.00825364	2	Warning: high variance	0	undetermined
P51965	Ubiquitin-conjugating enzyme E2 E1 OS=Homo sapiens OX=9606 GN=UBE2E1 PE=1 SV=1	UBE2E1	-0.118059	0.128858	-0.135526	-3.44836	-1.86975	0.0173342	0.0222266	2	Warning: high variance	0	undetermined
P84090	Enhancer of rudimentary homolog OS=Homo sapiens OX=9606 GN=ERH PE=1 SV=1	ERH	0.174375	-0.137509	0.108745	-3.41419	-1.84004	0.0088097	0.0471988	2	Warning: high variance	0	undetermined
Q9Y520	Protein PRRC2C OS=Homo sapiens OX=9606 GN=PRRC2C PE=1 SV=4	PRRC2C	0.0866817	-0.127084	0.118214	-3.34757	-1.79923	0.0153625	0.0315495	2	Warning: high variance	0	undetermined
Q96K21	Abscission/NoCut checkpoint regulator OS=Homo sapiens OX=9606 GN=ZFYVE19 PE=1 SV=3	ZFYVE19	0.0133508	-0.131258	0.107508	-3.24404	-1.71609	0.0123478	0.049659	2	Warning: high variance	0	undetermined
Q9BQC3	2-(3-amino-3-carboxypropyl)histidine synthase subunit 2 OS=Homo sapiens OX=9606 GN=DPH2 PE=1 SV=1	DPH2	-0.0551111	0.116128	-0.13417	-3.14809	-1.65662	0.0323035	0.0236505	2	Warning: high variance	0	undetermined
Q96AE4	Far upstream element-binding protein 1 OS=Homo sapiens OX=9606 GN=FUBP1 PE=1 SV=3	FUBP1	0.0189857	-0.120815	0.112626	-3.10271	-1.63377	0.0211075	0.0401333	2	Warning: high variance	0	undetermined
P15927	Replication protein A 32 kDa subunit OS=Homo sapiens OX=9606 GN=RPA2 PE=1 SV=1	RPA2	0.0462406	0.108824	-0.119903	-2.72852	-1.43771	0.045117	0.0440827	2	Warning: high variance	0	undetermined
P62857	40S ribosomal protein S28 OS=Homo sapiens OX=9606 GN=RPS28 PE=1 SV=1	RPS28	0.0353143	-0.279816	0.0850893	-7.89913	-5.17886	1.22294e-07	0.116206	1	Warning: high variance	0	undetermined
P68104	Elongation factor 1-alpha 1 OS=Homo sapiens OX=9606 GN=EEF1A1 PE=1 SV=1	EEF1A1	-0.0177067	0.277166	-0.0431694	-6.94514	-4.49371	2.43242e-07	0.501805	1	Warning: high variance	0	undetermined
Q86V81	THO complex subunit 4 OS=Homo sapiens OX=9606 GN=ALYREF PE=1 SV=3	ALYREF	-0.0111005	-0.268837	0.0168691	-6.60961	-4.27468	3.696e-07	0.705359	1	Warning: high variance	0	undetermined
Q4G0J3	La-related protein 7 OS=Homo sapiens OX=9606 GN=LARP7 PE=1 SV=1	LARP7	-0.0424698	0.242194	-0.0213175	-5.31514	-3.14771	6.58987e-06	0.772137	1	Warning: high variance	0	undetermined
Q9H6Z4	Ran-binding protein 3 OS=Homo sapiens OX=9606 GN=RANBP3 PE=1 SV=1	RANBP3	-0.069666	0.0100841	-0.260749	-5.19353	-3.07531	0.880355	7.60741e-06	1	Warning: high variance	0	undetermined
Q9Y5J9	Mitochondrial import inner membrane translocase subunit Tim8 B OS=Homo sapiens OX=9606 GN=TIMM8B PE=1 SV=1	TIMM8B	-0.0797896	-0.224172	0.0498535	-5.16216	-3.05918	2.1786e-05	0.339671	1	Warning: high variance	0	undetermined
Q96D15	Reticulocalbin-3 OS=Homo sapiens OX=9606 GN=RCN3 PE=1 SV=1	RCN3	-0.0383076	-0.224934	0.0339851	-5.01899	-2.93073	2.04382e-05	0.498176	1	Warning: high variance	0	undetermined
P61353	60S ribosomal protein L27 OS=Homo sapiens OX=9606 GN=RPL27 PE=1 SV=2	RPL27	0.0798034	-0.216989	0.0487818	-4.89156	-2.83133	3.94027e-05	0.349233	1	Warning: high variance	0	undetermined
Q92804	TATA-binding protein-associated factor 2N OS=Homo sapiens OX=9606 GN=TAF15 PE=1 SV=1	TAF15	0.0453311	-0.195865	0.0910227	-4.75746	-2.71149	0.000203584	0.0940042	1	Warning: high variance	0	undetermined
P83881	60S ribosomal protein L36a OS=Homo sapiens OX=9606 GN=RPL36A PE=1 SV=2	RPL36A	0.0890363	-0.220265	0.0218685	-4.73665	-2.71149	3.01353e-05	0.641567	1	Warning: high variance	0	undetermined
P29692	Elongation factor 1-delta OS=Homo sapiens OX=9606 GN=EEF1D PE=1 SV=5	EEF1D	-0.018055	-0.0691257	0.213376	-4.63969	-2.64251	0.181546	0.000136767	1	Warning: high variance	0	undetermined
P38571	Lysosomal acid lipase/cholesteryl ester hydrolase OS=Homo sapiens OX=9606 GN=LIPA PE=1 SV=2	LIPA	-0.108652	0.0978069	-0.20871	-4.62122	-2.63563	0.0723656	0.000362384	1	Warning: high variance	0	undetermined
Q13151	Heterogeneous nuclear ribonucleoprotein A0 OS=Homo sapiens OX=9606 GN=HNRNPA0 PE=1 SV=1	HNRNPA0	0.104707	-0.192464	0.0827103	-4.51788	-2.56484	0.000261527	0.126189	1	Warning: high variance	0	undetermined
P61927	60S ribosomal protein L37 OS=Homo sapiens OX=9606 GN=RPL37 PE=1 SV=2	RPL37	0.0791415	-0.20915	0.039601	-4.51744	-2.56484	7.37516e-05	0.438011	1	Warning: high variance	0	undetermined
P13807	Glycogen [starch] synthase, muscle OS=Homo sapiens OX=9606 GN=GYS1 PE=1 SV=2	GYS1	0.017128	0.215265	-0.0287814	-4.39294	-2.46103	6.30377e-05	0.674424	1	Warning: high variance	0	undetermined
P98179	RNA-binding protein 3 OS=Homo sapiens OX=9606 GN=RBM3 PE=1 SV=1	RBM3	0.0864843	-0.209544	0.0134925	-4.29067	-2.40653	7.15036e-05	0.749682	1	Warning: high variance	0	undetermined
Q14693	Phosphatidate phosphatase LPIN1 OS=Homo sapiens OX=9606 GN=LPIN1 PE=1 SV=2	LPIN1	-0.0470351	0.0455831	-0.217763	-4.11696	-2.26759	0.414084	0.000195814	1	Warning: high variance	0	undetermined
Q9NX55	Huntingtin-interacting protein K OS=Homo sapiens OX=9606 GN=HYPK PE=1 SV=2	HYPK	0.1033	-0.195977	0.0407767	-4.09103	-2.26601	0.000201901	0.425967	1	Warning: high variance	0	undetermined
O43688	Phospholipid phosphatase 2 OS=Homo sapiens OX=9606 GN=PLPP2 PE=1 SV=1	PLPP2	0.00920569	0.0292334	-0.222079	-4.07561	-2.25842	0.610126	0.000144804	1	Warning: high variance	0	undetermined
P46937	Transcriptional coactivator YAP1 OS=Homo sapiens OX=9606 GN=YAP1 PE=1 SV=2	YAP1	-0.0688741	-0.195257	0.039581	-4.05513	-2.24582	0.000212974	0.438218	1	Warning: high variance	0	undetermined
Q9BRP8	Partner of Y14 and mago OS=Homo sapiens OX=9606 GN=PYM1 PE=1 SV=1	PYM1	0.116935	-0.162756	0.106875	-4.03356	-2.24582	0.00198029	0.050961	1	Warning: high variance	0	undetermined
Q9BVS5	tRNA (adenine(58)-N(1))-methyltransferase, mitochondrial OS=Homo sapiens OX=9606 GN=TRMT61B PE=1 SV=2	TRMT61B	-0.0188583	0.0222975	-0.222778	-4.03305	-2.24582	0.704147	0.000137821	1	Warning: high variance	0	undetermined
O00622	CCN family member 1 OS=Homo sapiens OX=9606 GN=CCN1 PE=1 SV=1	CCN1	0.250125	0.00261544	-0.226853	-4.00588	-2.22583	0.991738	0.000103056	1	Warning: high variance	0	undetermined
P0CG12	Decreased expression in renal and prostate cancer protein OS=Homo sapiens OX=9606 GN=DERPC PE=1 SV=1	DERPC	0.0152452	-0.185962	0.0563087	-3.9517	-2.20203	0.000417637	0.285664	1	Warning: high variance	0	undetermined
P17096	High mobility group protein HMG-I/HMG-Y OS=Homo sapiens OX=9606 GN=HMGA1 PE=1 SV=3	HMGA1	0.060431	-0.201559	0.0039645	-3.95018	-2.20203	0.000132708	0.87882	1	Warning: high variance	0	undetermined
A6NHL2	Tubulin alpha chain-like 3 OS=Homo sapiens OX=9606 GN=TUBAL3 PE=1 SV=2	TUBAL3	-0.235055	0.00247157	-0.223918	-3.9136	-2.18073	0.993892	0.000127116	1	Warning: high variance	0	undetermined
Q9UK59	Lariat debranching enzyme OS=Homo sapiens OX=9606 GN=DBR1 PE=1 SV=2	DBR1	0.14362	0.2065	-0.00461256	-3.88847	-2.16194	0.00012472	0.998007	1	Warning: high variance	0	undetermined
Q13247	Serine/arginine-rich splicing factor 6 OS=Homo sapiens OX=9606 GN=SRSF6 PE=1 SV=2	SRSF6	0.132814	-0.168154	0.0816745	-3.7694	-2.06135	0.00140086	0.130739	1	Warning: high variance	0	undetermined
O60563	Cyclin-T1 OS=Homo sapiens OX=9606 GN=CCNT1 PE=1 SV=1	CCNT1	-0.00384974	-0.184341	0.0437364	-3.75617	-2.06002	0.000468319	0.396516	1	Warning: high variance	0	undetermined
P03891	NADH-ubiquinone oxidoreductase chain 2 OS=Homo sapiens OX=9606 GN=MT-ND2 PE=1 SV=2	MT-ND2	0.287881	0.190283	-0.0395698	-3.6724	-1.99912	0.000411962	0.542713	1	Warning: high variance	0	undetermined
P09429	High mobility group protein B1 OS=Homo sapiens OX=9606 GN=HMGB1 PE=1 SV=3	HMGB1	0.097414	-0.018125	0.200766	-3.65735	-1.9896	0.704778	0.000326305	1	Warning: high variance	0	undetermined
P56378	ATP synthase subunit ATP5MPL, mitochondrial OS=Homo sapiens OX=9606 GN=ATP5MPL PE=1 SV=1	ATP5MPL	0.12616	0.0209627	-0.21017	-3.64291	-1.98062	0.722831	0.000328662	1	Warning: high variance	0	undetermined
P35244	Replication protein A 14 kDa subunit OS=Homo sapiens OX=9606 GN=RPA3 PE=1 SV=1	RPA3	-0.0698518	0.0965591	-0.172611	-3.62842	-1.97153	0.0761634	0.00333663	1	Warning: high variance	0	undetermined
P61604	10 kDa heat shock protein, mitochondrial OS=Homo sapiens OX=9606 GN=HSPE1 PE=1 SV=2	HSPE1	-0.145483	-0.185518	0.024164	-3.59835	-1.95726	0.000431001	0.613105	1	Warning: high variance	0	undetermined
P62888	60S ribosomal protein L30 OS=Homo sapiens OX=9606 GN=RPL30 PE=1 SV=2	RPL30	0.0136754	-0.179458	0.0413317	-3.58216	-1.9462	0.000657745	0.420349	1	Warning: high variance	0	undetermined
O95881	Thioredoxin domain-containing protein 12 OS=Homo sapiens OX=9606 GN=TXNDC12 PE=1 SV=1	TXNDC12	0.00407886	-0.186986	0.0141892	-3.55949	-1.93503	0.000388333	0.740464	1	Warning: high variance	0	undetermined
P57105	Synaptojanin-2-binding protein OS=Homo sapiens OX=9606 GN=SYNJ2BP PE=1 SV=2	SYNJ2BP	-0.0428435	0.149544	-0.115299	-3.55592	-1.93503	0.00564447	0.0532596	1	Warning: high variance	0	undetermined
O14979	Heterogeneous nuclear ribonucleoprotein D-like OS=Homo sapiens OX=9606 GN=HNRNPDL PE=1 SV=3	HNRNPDL	0.0142227	-0.184076	0.0207095	-3.52379	-1.9078	0.000477144	0.656142	1	Warning: high variance	0	undetermined
P46779	60S ribosomal protein L28 OS=Homo sapiens OX=9606 GN=RPL28 PE=1 SV=3	RPL28	0.0768144	-0.186639	0.00864808	-3.50601	-1.89819	0.000398033	0.814709	1		0	undetermined
Q15637	Splicing factor 1 OS=Homo sapiens OX=9606 GN=SF1 PE=1 SV=4	SF1	0.0219409	-0.0479022	0.184037	-3.49905	-1.89819	0.348395	0.000963527	1	Warning: high variance	0	undetermined
P62847	40S ribosomal protein S24 OS=Homo sapiens OX=9606 GN=RPS24 PE=1 SV=1	RPS24	0.0633254	-0.18741	0.00383462	-3.49508	-1.89819	0.000376768	0.880612	1		0	undetermined
Q9BVA0	Katanin p80 WD40 repeat-containing subunit B1 OS=Homo sapiens OX=9606 GN=KATNB1 PE=1 SV=1	KATNB1	-0.0384439	0.0636679	-0.187544	-3.48934	-1.89709	0.24763	0.00139351	1	Warning: high variance	0	undetermined
P21926	CD9 antigen OS=Homo sapiens OX=9606 GN=CD9 PE=1 SV=4	CD9	0.0621852	0.0842373	-0.175341	-3.48471	-1.89706	0.123037	0.0028579	1	Warning: high variance	0	undetermined
Q9H0E2	Toll-interacting protein OS=Homo sapiens OX=9606 GN=TOLLIP PE=1 SV=1	TOLLIP	-0.0625567	0.172562	-0.0636642	-3.40563	-1.83589	0.00137556	0.303012	1	Warning: high variance	0	undetermined
Q15048	Leucine-rich repeat-containing protein 14 OS=Homo sapiens OX=9606 GN=LRRC14 PE=1 SV=1	LRRC14	-0.0517031	0.169111	-0.0707669	-3.3964	-1.83102	0.00171868	0.248425	1	Warning: high variance	0	undetermined
Q9Y2B0	Protein canopy homolog 2 OS=Homo sapiens OX=9606 GN=CNPY2 PE=1 SV=1	CNPY2	0.0286219	-0.0770482	0.163889	-3.38707	-1.82658	0.137626	0.00319133	1	Warning: high variance	0	undetermined
Q5BJF2	Sigma intracellular receptor 2 OS=Homo sapiens OX=9606 GN=TMEM97 PE=1 SV=1	TMEM97	-0.0591106	0.14089	-0.113605	-3.31318	-1.77226	0.00917818	0.0570159	1	Warning: high variance	0	undetermined
P60604	Ubiquitin-conjugating enzyme E2 G2 OS=Homo sapiens OX=9606 GN=UBE2G2 PE=1 SV=1	UBE2G2	0.140183	-0.0172676	0.18613	-3.23534	-1.71135	0.716763	0.000845194	1	Warning: high variance	0	undetermined
Q9NU22	Midasin OS=Homo sapiens OX=9606 GN=MDN1 PE=1 SV=2	MDN1	0.023311	0.0661511	-0.174727	-3.195	-1.69032	0.229082	0.00295969	1	Warning: high variance	0	undetermined
Q8IXM2	Chromatin complexes subunit BAP18 OS=Homo sapiens OX=9606 GN=BAP18 PE=1 SV=1	BAP18	-0.0322745	0.0187885	-0.193948	-3.16675	-1.66583	0.753616	0.000939808	1	Warning: high variance	0	undetermined
O60841	Eukaryotic translation initiation factor 5B OS=Homo sapiens OX=9606 GN=EIF5B PE=1 SV=4	EIF5B	-0.00142039	-0.155758	0.0613774	-3.14645	-1.65662	0.00305806	0.247555	1	Warning: high variance	0	undetermined
Q6P4E1	Protein CASC4 OS=Homo sapiens OX=9606 GN=CASC4 PE=1 SV=2	CASC4	0.00639059	0.0461792	-0.182402	-3.13414	-1.64795	0.407719	0.00189589	1	Warning: high variance	0	undetermined
Q12788	Transducin beta-like protein 3 OS=Homo sapiens OX=9606 GN=TBL3 PE=1 SV=2	TBL3	-0.0230412	0.0226564	-0.191054	-3.12205	-1.64447	0.699153	0.00112455	1	Warning: high variance	0	undetermined
Q9UBR2	Cathepsin Z OS=Homo sapiens OX=9606 GN=CTSZ PE=1 SV=1	CTSZ	-0.0123797	0.0570795	-0.175899	-3.10224	-1.63377	0.301847	0.00276807	1	Warning: high variance	0	undetermined
Q6PJT7	Zinc finger CCCH domain-containing protein 14 OS=Homo sapiens OX=9606 GN=ZC3H14 PE=1 SV=1	ZC3H14	0.0762738	-0.143998	0.0792912	-3.08952	-1.62452	0.0061227	0.141691	1	Warning: high variance	0	undetermined
Q3KQU3	MAP7 domain-containing protein 1 OS=Homo sapiens OX=9606 GN=MAP7D1 PE=1 SV=1	MAP7D1	0.0707847	-0.145944	0.0750777	-3.07725	-1.61909	0.00547515	0.162759	1	Warning: high variance	0	undetermined
Q9H444	Charged multivesicular body protein 4b OS=Homo sapiens OX=9606 GN=CHMP4B PE=1 SV=1	CHMP4B	-0.00150972	-0.140957	0.0823024	-3.05915	-1.60663	0.0072733	0.127966	1	Warning: high variance	0	undetermined
P35250	Replication factor C subunit 2 OS=Homo sapiens OX=9606 GN=RFC2 PE=1 SV=3	RFC2	0.00660886	0.017569	-0.189333	-3.0324	-1.58492	0.77106	0.0012498	1	Warning: high variance	0	undetermined
Q14919	Dr1-associated corepressor OS=Homo sapiens OX=9606 GN=DRAP1 PE=1 SV=3	DRAP1	-0.00974516	-0.124028	0.104693	-3.02973	-1.58492	0.017964	0.0556622	1	Warning: high variance	0	undetermined
P57088	Transmembrane protein 33 OS=Homo sapiens OX=9606 GN=TMEM33 PE=1 SV=2	TMEM33	-0.0427176	0.10044	-0.143024	-3.02363	-1.58211	0.0648593	0.0156247	1	Warning: high variance	0	undetermined
P27797	Calreticulin OS=Homo sapiens OX=9606 GN=CALR PE=1 SV=1	CALR	0.25652	-0.0670997	0.154572	-3.01004	-1.57177	0.194292	0.00534003	1	Warning: high variance	0	undetermined
P54252	Ataxin-3 OS=Homo sapiens OX=9606 GN=ATXN3 PE=1 SV=5	ATXN3	-0.0446104	0.105765	-0.134731	-2.95346	-1.5314	0.0516345	0.0230524	1	Warning: high variance	0	undetermined
O15427	Monocarboxylate transporter 4 OS=Homo sapiens OX=9606 GN=SLC16A3 PE=1 SV=1	SLC16A3	0.0439025	0.0689956	-0.162811	-2.94783	-1.5314	0.209076	0.00571769	1	Warning: high variance	0	undetermined
Q8TEA8	D-aminoacyl-tRNA deacylase 1 OS=Homo sapiens OX=9606 GN=DTD1 PE=1 SV=2	DTD1	0.0265172	-0.133637	0.0858778	-2.9379	-1.52786	0.0108749	0.113038	1	Warning: high variance	0	undetermined
Q9UJU6	Drebrin-like protein OS=Homo sapiens OX=9606 GN=DBNL PE=1 SV=1	DBNL	0.0836602	-0.13735	0.0789133	-2.92111	-1.52008	0.0088872	0.143491	1	Warning: high variance	0	undetermined
Q8IVM0	Coiled-coil domain-containing protein 50 OS=Homo sapiens OX=9606 GN=CCDC50 PE=1 SV=1	CCDC50	0.0514088	-0.0787802	0.142525	-2.91481	-1.51812	0.129217	0.0100198	1	Warning: high variance	0	undetermined
Q03013	Glutathione S-transferase Mu 4 OS=Homo sapiens OX=9606 GN=GSTM4 PE=1 SV=3	GSTM4	0.0385327	0.126098	-0.109968	-2.91065	-1.51812	0.0199256	0.0658279	1	Warning: high variance	0	undetermined
P62244	40S ribosomal protein S15a OS=Homo sapiens OX=9606 GN=RPS15A PE=1 SV=2	RPS15A	-0.0165359	0.0225698	-0.182933	-2.90747	-1.51812	0.700357	0.00183715	1	Warning: high variance	0	undetermined
P62995	Transformer-2 protein homolog beta OS=Homo sapiens OX=9606 GN=TRA2B PE=1 SV=1	TRA2B	0.10756	-0.051488	0.159181	-2.90658	-1.51812	0.314895	0.00415206	1	Warning: high variance	0	undetermined
P18621	60S ribosomal protein L17 OS=Homo sapiens OX=9606 GN=RPL17 PE=1 SV=3	RPL17	0.152476	-0.0747775	0.14492	-2.90452	-1.51812	0.149281	0.00887001	1	Warning: high variance	0	undetermined
O75879	Glutamyl-tRNA(Gln) amidotransferase subunit B, mitochondrial OS=Homo sapiens OX=9606 GN=GATB PE=1 SV=1	GATB	-0.0196663	0.0908209	-0.145147	-2.8972	-1.51367	0.0957721	0.0141006	1	Warning: high variance	0	undetermined
Q7Z2W4	Zinc finger CCCH-type antiviral protein 1 OS=Homo sapiens OX=9606 GN=ZC3HAV1 PE=1 SV=3	ZC3HAV1	-0.020916	-0.14683	0.0594871	-2.89064	-1.50995	0.00520159	0.261329	1	Warning: high variance	0	undetermined
Q9UJX2	Cell division cycle protein 23 homolog OS=Homo sapiens OX=9606 GN=CDC23 PE=1 SV=3	CDC23	-0.0267646	0.0122417	-0.1851	-2.87815	-1.50311	0.848517	0.00161457	1	Warning: high variance	0	undetermined
Q99733	Nucleosome assembly protein 1-like 4 OS=Homo sapiens OX=9606 GN=NAP1L4 PE=1 SV=1	NAP1L4	-0.0351003	-0.0772642	0.141713	-2.87257	-1.50216	0.136555	0.0104391	1	Warning: high variance	0	undetermined
Q86V48	Leucine zipper protein 1 OS=Homo sapiens OX=9606 GN=LUZP1 PE=1 SV=2	LUZP1	-0.0257958	-0.151105	0.0487473	-2.87164	-1.50216	0.00404653	0.349544	1	Warning: high variance	0	undetermined
Q04323	UBX domain-containing protein 1 OS=Homo sapiens OX=9606 GN=UBXN1 PE=1 SV=2	UBXN1	0.101196	-0.14892	0.0527044	-2.86125	-1.49454	0.0046041	0.315059	1	Warning: high variance	0	undetermined
Q9Y5U2	Protein TSSC4 OS=Homo sapiens OX=9606 GN=TSSC4 PE=1 SV=3	TSSC4	-0.000342637	-0.150776	0.048201	-2.85691	-1.49386	0.00412624	0.354486	1	Warning: high variance	0	undetermined
Q15004	PCNA-associated factor OS=Homo sapiens OX=9606 GN=PCLAF PE=1 SV=1	PCLAF	-0.0508915	-0.163178	0.00753896	-2.81081	-1.46816	0.00192818	0.829796	1		0	undetermined
Q9UNS1	Protein timeless homolog OS=Homo sapiens OX=9606 GN=TIMELESS PE=1 SV=2	TIMELESS	-0.109657	0.095175	-0.137062	-2.80511	-1.46762	0.0805648	0.0207044	1	Warning: high variance	0	undetermined
Q5TZA2	Rootletin OS=Homo sapiens OX=9606 GN=CROCC PE=1 SV=1	CROCC	-0.0149804	0.157327	-0.0459883	-2.7942	-1.45935	0.00357034	0.470946	1	Warning: high variance	0	undetermined
Q9H981	Actin-related protein 8 OS=Homo sapiens OX=9606 GN=ACTR8 PE=1 SV=2	ACTR8	-0.028677	0.0322553	-0.174777	-2.79173	-1.45935	0.570982	0.00295141	1	Warning: high variance	0	undetermined
Q5JPH6	Probable glutamate--tRNA ligase, mitochondrial OS=Homo sapiens OX=9606 GN=EARS2 PE=1 SV=2	EARS2	-0.0444708	0.148528	-0.0653993	-2.78507	-1.45522	0.00598323	0.288992	1	Warning: high variance	0	undetermined
P62851	40S ribosomal protein S25 OS=Homo sapiens OX=9606 GN=RPS25 PE=1 SV=1	RPS25	0.141549	-0.0959253	0.121128	-2.7652	-1.44608	0.0659218	0.0277347	1	Warning: high variance	0	undetermined
O43290	U4/U6.U5 tri-snRNP-associated protein 1 OS=Homo sapiens OX=9606 GN=SART1 PE=1 SV=1	SART1	0.0394001	-0.13507	0.0715496	-2.76159	-1.44608	0.010065	0.18215	1	Warning: high variance	0	undetermined
P11166	Solute carrier family 2, facilitated glucose transporter member 1 OS=Homo sapiens OX=9606 GN=SLC2A1 PE=1 SV=2	SLC2A1	-0.039013	0.168256	-0.00572218	-2.75984	-1.44608	0.00181509	0.986514	1		0	undetermined
Q9Y3C1	Nucleolar protein 16 OS=Homo sapiens OX=9606 GN=NOP16 PE=1 SV=2	NOP16	0.0378826	-0.120432	0.0933738	-2.75861	-1.44608	0.0215121	0.0862073	1	Warning: high variance	0	undetermined
O75477	Erlin-1 OS=Homo sapiens OX=9606 GN=ERLIN1 PE=1 SV=2	ERLIN1	-0.0041735	-0.151368	0.0364263	-2.74592	-1.43822	0.00398366	0.471497	1		0	undetermined
Q14157	Ubiquitin-associated protein 2-like OS=Homo sapiens OX=9606 GN=UBAP2L PE=1 SV=2	UBAP2L	0.0304538	-0.0968602	0.119036	-2.74183	-1.43771	0.0633822	0.0304296	1	Warning: high variance	0	undetermined
P09417	Dihydropteridine reductase OS=Homo sapiens OX=9606 GN=QDPR PE=1 SV=2	QDPR	-0.127515	0.159754	-0.0330664	-2.73574	-1.43771	0.00308271	0.620596	1		0	undetermined
Q9NUQ6	SPATS2-like protein OS=Homo sapiens OX=9606 GN=SPATS2L PE=1 SV=2	SPATS2L	0.0329257	-0.0764288	0.135879	-2.73301	-1.43771	0.140733	0.013935	1	Warning: high variance	0	undetermined
Q14315	Filamin-C OS=Homo sapiens OX=9606 GN=FLNC PE=1 SV=3	FLNC	0.0600304	-0.0553519	0.149547	-2.72995	-1.43771	0.28125	0.00697755	1	Warning: high variance	0	undetermined
O60220	Mitochondrial import inner membrane translocase subunit Tim8 A OS=Homo sapiens OX=9606 GN=TIMM8A PE=1 SV=1	TIMM8A	0.00323512	-0.125069	0.0850045	-2.72806	-1.43771	0.0170375	0.116551	1	Warning: high variance	0	undetermined
Q96EP5	DAZ-associated protein 1 OS=Homo sapiens OX=9606 GN=DAZAP1 PE=1 SV=1	DAZAP1	0.108233	-0.0686547	0.140892	-2.72211	-1.43606	0.184453	0.010878	1	Warning: high variance	0	undetermined
P04049	RAF proto-oncogene serine/threonine-protein kinase OS=Homo sapiens OX=9606 GN=RAF1 PE=1 SV=1	RAF1	-0.0512251	-0.0540915	0.149728	-2.71762	-1.43606	0.291946	0.00691139	1	Warning: high variance	0	undetermined
P18859	ATP synthase-coupling factor 6, mitochondrial OS=Homo sapiens OX=9606 GN=ATP5PF PE=1 SV=1	ATP5PF	-0.0587678	-0.161314	0.00158303	-2.71759	-1.43606	0.00216869	0.911754	1		0	undetermined
Q15528	Mediator of RNA polymerase II transcription subunit 22 OS=Homo sapiens OX=9606 GN=MED22 PE=1 SV=2	MED22	-0.0621234	0.0917737	-0.135596	-2.71588	-1.43606	0.0922617	0.0221555	1	Warning: high variance	0	undetermined
O00193	Small acidic protein OS=Homo sapiens OX=9606 GN=SMAP PE=1 SV=1	SMAP	0.170179	-0.0828275	0.129979	-2.71337	-1.4358	0.111126	0.018484	1	Warning: high variance	0	undetermined
P46777	60S ribosomal protein L5 OS=Homo sapiens OX=9606 GN=RPL5 PE=1 SV=3	RPL5	0.0640068	-0.0883172	0.125077	-2.70729	-1.43272	0.0898527	0.0232028	1	Warning: high variance	0	undetermined
Q15061	WD repeat-containing protein 43 OS=Homo sapiens OX=9606 GN=WDR43 PE=1 SV=3	WDR43	-0.0580855	0.0592113	-0.158116	-2.70488	-1.43272	0.2835	0.00733058	1	Warning: high variance	0	undetermined
O75817	Ribonuclease P protein subunit p20 OS=Homo sapiens OX=9606 GN=POP7 PE=1 SV=2	POP7	-0.0182071	0.0453219	-0.165304	-2.70148	-1.43272	0.416891	0.00499839	1	Warning: high variance	0	undetermined
Q9NZT2	Opioid growth factor receptor OS=Homo sapiens OX=9606 GN=OGFR PE=1 SV=3	OGFR	0.0847213	-0.110179	0.10171	-2.68342	-1.41689	0.0351646	0.0626714	1	Warning: high variance	0	undetermined
Q96LB3	Intraflagellar transport protein 74 homolog OS=Homo sapiens OX=9606 GN=IFT74 PE=1 SV=1	IFT74	-0.0332001	0.128864	-0.0917232	-2.67818	-1.41384	0.0173288	0.128361	1	Warning: high variance	0	undetermined
O43715	TP53-regulated inhibitor of apoptosis 1 OS=Homo sapiens OX=9606 GN=TRIAP1 PE=1 SV=1	TRIAP1	0.0650819	-0.0592124	0.144789	-2.67394	-1.41176	0.250158	0.00892998	1	Warning: high variance	0	undetermined
P09382	Galectin-1 OS=Homo sapiens OX=9606 GN=LGALS1 PE=1 SV=2	LGALS1	-0.0835702	-0.116463	0.0921394	-2.65355	-1.40085	0.0261221	0.0902332	1	Warning: high variance	0	undetermined
Q13428	Treacle protein OS=Homo sapiens OX=9606 GN=TCOF1 PE=1 SV=3	TCOF1	0.0395432	-0.0878141	0.122752	-2.65236	-1.40085	0.0916547	0.0257858	1	Warning: high variance	0	undetermined
P53794	Sodium/myo-inositol cotransporter OS=Homo sapiens OX=9606 GN=SLC5A3 PE=1 SV=2	SLC5A3	-0.0220495	0.052267	-0.159361	-2.64522	-1.39724	0.346108	0.00686706	1	Warning: high variance	0	undetermined
Q14137	Ribosome biogenesis protein BOP1 OS=Homo sapiens OX=9606 GN=BOP1 PE=1 SV=2	BOP1	0.111949	0.142913	-0.0652016	-2.64455	-1.39724	0.00820985	0.290568	1	Warning: high variance	0	undetermined
P40261	Nicotinamide N-methyltransferase OS=Homo sapiens OX=9606 GN=NNMT PE=1 SV=1	NNMT	-0.138138	0.0253838	-0.171286	-2.64035	-1.39512	0.66164	0.0035945	1		0	undetermined
O75940	Survival of motor neuron-related-splicing factor 30 OS=Homo sapiens OX=9606 GN=SMNDC1 PE=1 SV=1	SMNDC1	-0.0242384	-0.125613	0.0778065	-2.63254	-1.39153	0.0165707	0.148862	1	Warning: high variance	0	undetermined
Q13257	Mitotic spindle assembly checkpoint protein MAD2A OS=Homo sapiens OX=9606 GN=MAD2L1 PE=1 SV=1	MAD2L1	0.0599943	0.100663	-0.123083	-2.63215	-1.39153	0.0642538	0.0385538	1	Warning: high variance	0	undetermined
O15234	Protein CASC3 OS=Homo sapiens OX=9606 GN=CASC3 PE=1 SV=2	CASC3	0.00981608	-0.07163	0.134343	-2.62601	-1.39153	0.166663	0.015012	1	Warning: high variance	0	undetermined
P35625	Metalloproteinase inhibitor 3 OS=Homo sapiens OX=9606 GN=TIMP3 PE=1 SV=2	TIMP3	-0.0298669	0.0400769	-0.164515	-2.62446	-1.39153	0.475602	0.0052169	1	Warning: high variance	0	undetermined
P06748	Nucleophosmin OS=Homo sapiens OX=9606 GN=NPM1 PE=1 SV=2	NPM1	0.0692341	-0.149694	0.0279088	-2.62015	-1.39043	0.00439903	0.567917	1		0	undetermined
Q9Y3A5	Ribosome maturation protein SBDS OS=Homo sapiens OX=9606 GN=SBDS PE=1 SV=4	SBDS	0.026216	0.150125	-0.0469975	-2.61935	-1.39043	0.00545842	0.460158	1	Warning: high variance	0	undetermined
P28072	Proteasome subunit beta type-6 OS=Homo sapiens OX=9606 GN=PSMB6 PE=1 SV=4	PSMB6	-0.0661565	0.127261	-0.0897698	-2.61348	-1.38656	0.0187951	0.137162	1	Warning: high variance	0	undetermined
P84098	60S ribosomal protein L19 OS=Homo sapiens OX=9606 GN=RPL19 PE=1 SV=1	RPL19	0.0520649	-0.129193	0.0704384	-2.60939	-1.38623	0.0137667	0.188599	1	Warning: high variance	0	undetermined
P03897	NADH-ubiquinone oxidoreductase chain 3 OS=Homo sapiens OX=9606 GN=MT-ND3 PE=1 SV=1	MT-ND3	-0.0352814	0.13194	-0.0818455	-2.60419	-1.3832	0.0147936	0.177694	1	Warning: high variance	0	undetermined
P61019	Ras-related protein Rab-2A OS=Homo sapiens OX=9606 GN=RAB2A PE=1 SV=1	RAB2A	-0.0465455	0.12402	-0.0933221	-2.59611	-1.37959	0.0220942	0.121489	1	Warning: high variance	0	undetermined
Q96L58	Beta-1,3-galactosyltransferase 6 OS=Homo sapiens OX=9606 GN=B3GALT6 PE=1 SV=2	B3GALT6	-0.0341782	0.0312308	-0.167102	-2.59472	-1.37959	0.584118	0.00453173	1	Warning: high variance	0	undetermined
Q13362	Serine/threonine-protein phosphatase 2A 56 kDa regulatory subunit gamma isoform OS=Homo sapiens OX=9606 GN=PPP2R5C PE=1 SV=3	PPP2R5C	0.0377171	0.063925	-0.149656	-2.57946	-1.37011	0.245662	0.0112918	1	Warning: high variance	0	undetermined
O75348	V-type proton ATPase subunit G 1 OS=Homo sapiens OX=9606 GN=ATP6V1G1 PE=1 SV=3	ATP6V1G1	0.011834	-0.145824	0.0335204	-2.57524	-1.36915	0.00551331	0.503343	1		0	undetermined
O75400	Pre-mRNA-processing factor 40 homolog A OS=Homo sapiens OX=9606 GN=PRPF40A PE=1 SV=2	PRPF40A	0.157914	-0.13427	0.0584228	-2.57022	-1.36915	0.0105104	0.269312	1		0	undetermined
Q9NUM4	Transmembrane protein 106B OS=Homo sapiens OX=9606 GN=TMEM106B PE=1 SV=2	TMEM106B	0.0208786	0.157655	-0.0187144	-2.56341	-1.36915	0.00350058	0.80718	1		0	undetermined
Q86UV5	Ubiquitin carboxyl-terminal hydrolase 48 OS=Homo sapiens OX=9606 GN=USP48 PE=1 SV=1	USP48	0.0652575	0.134203	-0.0749728	-2.56267	-1.36915	0.0131436	0.219551	1	Warning: high variance	0	undetermined
Q9UHV9	Prefoldin subunit 2 OS=Homo sapiens OX=9606 GN=PFDN2 PE=1 SV=1	PFDN2	0.03295	-0.0964501	0.109874	-2.5624	-1.36915	0.064486	0.0450426	1	Warning: high variance	0	undetermined
Q13572	Inositol-tetrakisphosphate 1-kinase OS=Homo sapiens OX=9606 GN=ITPK1 PE=1 SV=2	ITPK1	0.00545945	0.157623	-0.0169887	-2.54981	-1.36622	0.00350735	0.830631	1		0	undetermined
Q14457	Beclin-1 OS=Homo sapiens OX=9606 GN=BECN1 PE=1 SV=2	BECN1	-0.156554	0.0241258	-0.168002	-2.54951	-1.36622	0.678845	0.00431317	1		0	undetermined
Q9NX63	MICOS complex subunit MIC19 OS=Homo sapiens OX=9606 GN=CHCHD3 PE=1 SV=1	CHCHD3	-0.000819697	-0.0878288	0.11678	-2.5369	-1.35891	0.0916016	0.0335863	1	Warning: high variance	0	undetermined
O43502	DNA repair protein RAD51 homolog 3 OS=Homo sapiens OX=9606 GN=RAD51C PE=1 SV=1	RAD51C	0.000824363	0.149307	-0.0388367	-2.51877	-1.34609	0.00572172	0.551244	1		0	undetermined
P39019	40S ribosomal protein S19 OS=Homo sapiens OX=9606 GN=RPS19 PE=1 SV=2	RPS19	0.0853946	-0.108335	0.0924855	-2.49182	-1.32415	0.0382797	0.0890896	1	Warning: high variance	0	undetermined
Q13308	Inactive tyrosine-protein kinase 7 OS=Homo sapiens OX=9606 GN=PTK7 PE=1 SV=2	PTK7	-0.0405189	0.0428517	-0.156987	-2.48091	-1.31693	0.443993	0.00777458	1	Warning: high variance	0	undetermined
P18074	General transcription and DNA repair factor IIH helicase subunit XPD OS=Homo sapiens OX=9606 GN=ERCC2 PE=1 SV=1	ERCC2	-0.054252	0.0424046	-0.155695	-2.44677	-1.29133	0.449004	0.00831219	1	Warning: high variance	0	undetermined
P62269	40S ribosomal protein S18 OS=Homo sapiens OX=9606 GN=RPS18 PE=1 SV=3	RPS18	-0.0186251	-0.137617	0.0406983	-2.44649	-1.29133	0.00875723	0.426765	1		0	undetermined
O43414	ERI1 exoribonuclease 3 OS=Homo sapiens OX=9606 GN=ERI3 PE=1 SV=2	ERI3	-0.0888271	0.117618	-0.0922976	-2.44509	-1.29133	0.0301132	0.125858	1	Warning: high variance	0	undetermined
Q9NXK8	F-box/LRR-repeat protein 12 OS=Homo sapiens OX=9606 GN=FBXL12 PE=1 SV=1	FBXL12	-0.0176923	0.0283037	-0.161387	-2.43207	-1.28629	0.622403	0.00616936	1		0	undetermined
Q05682	Caldesmon OS=Homo sapiens OX=9606 GN=CALD1 PE=1 SV=3	CALD1	0.0760619	-0.111114	0.0851172	-2.43171	-1.28629	0.0336707	0.116092	1		0	undetermined
P49902	Cytosolic purine 5'-nucleotidase OS=Homo sapiens OX=9606 GN=NT5C2 PE=1 SV=1	NT5C2	-0.00704356	0.138375	-0.0555054	-2.42363	-1.2822	0.0105231	0.374894	1		0	undetermined
Q9Y5N5	Methyltransferase N6AMT1 OS=Homo sapiens OX=9606 GN=N6AMT1 PE=1 SV=4	N6AMT1	-0.0433847	0.0522945	-0.14939	-2.42269	-1.2822	0.345844	0.0114429	1	Warning: high variance	0	undetermined
Q9Y5L4	Mitochondrial import inner membrane translocase subunit Tim13 OS=Homo sapiens OX=9606 GN=TIMM13 PE=1 SV=1	TIMM13	-0.134606	-0.131623	0.0510502	-2.41971	-1.28132	0.012111	0.329193	1		0	undetermined
Q9NYY8	FAST kinase domain-containing protein 2, mitochondrial OS=Homo sapiens OX=9606 GN=FASTKD2 PE=1 SV=1	FASTKD2	-0.045808	0.0599781	-0.144585	-2.41741	-1.28132	0.27709	0.0144907	1	Warning: high variance	0	undetermined
P49321	Nuclear autoantigenic sperm protein OS=Homo sapiens OX=9606 GN=NASP PE=1 SV=2	NASP	0.00971539	-0.0816979	0.115862	-2.4159	-1.28132	0.115962	0.0349488	1	Warning: high variance	0	undetermined
Q9H5Q4	Dimethyladenosine transferase 2, mitochondrial OS=Homo sapiens OX=9606 GN=TFB2M PE=1 SV=1	TFB2M	-0.0552851	0.051036	-0.149756	-2.41533	-1.28132	0.358063	0.0112357	1	Warning: high variance	0	undetermined
Q13610	Periodic tryptophan protein 1 homolog OS=Homo sapiens OX=9606 GN=PWP1 PE=1 SV=1	PWP1	0.197023	-0.0883672	0.109348	-2.40813	-1.28116	0.0896752	0.0460364	1	Warning: high variance	0	undetermined
Q9Y4G6	Talin-2 OS=Homo sapiens OX=9606 GN=TLN2 PE=1 SV=4	TLN2	-0.0156879	-0.129166	0.0546625	-2.40583	-1.28116	0.013786	0.298851	1		0	undetermined
P24534	Elongation factor 1-beta OS=Homo sapiens OX=9606 GN=EEF1B2 PE=1 SV=3	EEF1B2	0.0130982	-0.048842	0.138333	-2.39752	-1.27619	0.339404	0.0123548	1		0	undetermined
Q15365	Poly(rC)-binding protein 1 OS=Homo sapiens OX=9606 GN=PCBP1 PE=1 SV=2	PCBP1	0.0519217	0.133198	-0.063008	-2.38973	-1.26999	0.013855	0.308429	1		0	undetermined
P48634	Protein PRRC2A OS=Homo sapiens OX=9606 GN=PRRC2A PE=1 SV=3	PRRC2A	0.0253397	-0.0811933	0.114081	-2.37411	-1.26422	0.118175	0.0377269	1		0	undetermined
O94905	Erlin-2 OS=Homo sapiens OX=9606 GN=ERLIN2 PE=1 SV=1	ERLIN2	0.100759	-0.142314	0.0208371	-2.37132	-1.26382	0.00673781	0.654532	1		0	undetermined
Q14320	Protein FAM50A OS=Homo sapiens OX=9606 GN=FAM50A PE=1 SV=2	FAM50A	0.0862946	-0.0634037	0.127696	-2.36771	-1.26172	0.219213	0.0205661	1		0	undetermined
P31689	DnaJ homolog subfamily A member 1 OS=Homo sapiens OX=9606 GN=DNAJA1 PE=1 SV=2	DNAJA1	0.094522	-0.0587779	0.13068	-2.36472	-1.26068	0.253532	0.0178825	1		0	undetermined
Q8TDX7	Serine/threonine-protein kinase Nek7 OS=Homo sapiens OX=9606 GN=NEK7 PE=1 SV=1	NEK7	-0.0596506	0.143941	-0.0363301	-2.36304	-1.26068	0.00775361	0.5809	1		0	undetermined
Q9P2E9	Ribosome-binding protein 1 OS=Homo sapiens OX=9606 GN=RRBP1 PE=1 SV=5	RRBP1	0.097642	-0.119449	0.0681665	-2.36216	-1.26068	0.0225831	0.202305	1		0	undetermined
Q92685	Dol-P-Man:Man(5)GlcNAc(2)-PP-Dol alpha-1,3-mannosyltransferase OS=Homo sapiens OX=9606 GN=ALG3 PE=1 SV=1	ALG3	-0.0825417	0.0675492	-0.136345	-2.35051	-1.25201	0.219084	0.0214038	1	Warning: high variance	0	undetermined
P99999	Cytochrome c OS=Homo sapiens OX=9606 GN=CYCS PE=1 SV=2	CYCS	0.00412973	0.117748	-0.08504	-2.34118	-1.2471	0.0299272	0.160395	1	Warning: high variance	0	undetermined
P36507	Dual specificity mitogen-activated protein kinase kinase 2 OS=Homo sapiens OX=9606 GN=MAP2K2 PE=1 SV=1	MAP2K2	-0.0358358	-0.00771193	0.153592	-2.33119	-1.24149	0.854439	0.00562892	1		0	undetermined
P42126	Enoyl-CoA delta isomerase 1, mitochondrial OS=Homo sapiens OX=9606 GN=ECI1 PE=1 SV=1	ECI1	-0.0130643	0.0142588	-0.162084	-2.32631	-1.23806	0.818972	0.00594437	1		0	undetermined
Q96GW9	Methionine--tRNA ligase, mitochondrial OS=Homo sapiens OX=9606 GN=MARS2 PE=1 SV=2	MARS2	-0.0220852	0.0431803	-0.149573	-2.31994	-1.23457	0.440331	0.0113388	1		0	undetermined
Q9Y5Q9	General transcription factor 3C polypeptide 3 OS=Homo sapiens OX=9606 GN=GTF3C3 PE=1 SV=1	GTF3C3	0.0335775	0.0323517	-0.154412	-2.31255	-1.23005	0.569753	0.00887878	1		0	undetermined
Q6P1X6	UPF0598 protein C8orf82 OS=Homo sapiens OX=9606 GN=C8orf82 PE=1 SV=2	C8orf82	0.0458097	0.04315	-0.148909	-2.30517	-1.22552	0.440667	0.01172	1		0	undetermined
Q9Y3D9	28S ribosomal protein S23, mitochondrial OS=Homo sapiens OX=9606 GN=MRPS23 PE=1 SV=2	MRPS23	0.0707758	-0.0437048	0.136608	-2.29872	-1.22294	0.390377	0.0134477	1		0	undetermined
P09496	Clathrin light chain A OS=Homo sapiens OX=9606 GN=CLTA PE=1 SV=1	CLTA	0.0117719	-0.128426	0.0467583	-2.29738	-1.22294	0.0143293	0.367749	1		0	undetermined
Q96B97	SH3 domain-containing kinase-binding protein 1 OS=Homo sapiens OX=9606 GN=SH3KBP1 PE=1 SV=2	SH3KBP1	0.0670523	-0.0471961	0.134414	-2.29382	-1.2226	0.355249	0.0149607	1		0	undetermined
Q9H993	Damage-control phosphatase ARMT1 OS=Homo sapiens OX=9606 GN=ARMT1 PE=1 SV=1	ARMT1	-0.0221384	0.0142696	-0.158686	-2.24809	-1.19192	0.818816	0.00711498	1		0	undetermined
P51580	Thiopurine S-methyltransferase OS=Homo sapiens OX=9606 GN=TPMT PE=1 SV=1	TPMT	0.0115154	0.0392397	-0.147891	-2.24044	-1.18829	0.485376	0.0123259	1		0	undetermined
Q9H871	E3 ubiquitin-protein transferase RMND5A OS=Homo sapiens OX=9606 GN=RMND5A PE=1 SV=1	RMND5A	0.0670466	-0.117879	0.0603459	-2.2266	-1.17842	0.0243876	0.255007	1		0	undetermined
Q9BT25	HAUS augmin-like complex subunit 8 OS=Homo sapiens OX=9606 GN=HAUS8 PE=1 SV=3	HAUS8	0.21638	0.136958	-0.0393358	-2.22458	-1.17772	0.0113556	0.545429	1		0	undetermined
P10809	60 kDa heat shock protein, mitochondrial OS=Homo sapiens OX=9606 GN=HSPD1 PE=1 SV=2	HSPD1	0.0214325	-0.0756692	0.110643	-2.22184	-1.17629	0.144617	0.0436226	1		0	undetermined
Q9NQ88	Fructose-2,6-bisphosphatase TIGAR OS=Homo sapiens OX=9606 GN=TIGAR PE=1 SV=1	TIGAR	0.133792	0.131044	-0.0498681	-2.19387	-1.15875	0.0154965	0.430242	1		0	undetermined
Q9BSF4	Mitochondrial import inner membrane translocase subunit Tim29 OS=Homo sapiens OX=9606 GN=TIMM29 PE=1 SV=2	TIMM29	0.0638444	0.0493498	-0.140183	-2.19205	-1.15875	0.374854	0.0178897	1		0	undetermined
P60602	Reactive oxygen species modulator 1 OS=Homo sapiens OX=9606 GN=ROMO1 PE=1 SV=1	ROMO1	0.0187259	0.0536296	-0.137534	-2.18983	-1.15875	0.333176	0.0202558	1		0	undetermined
P35637	RNA-binding protein FUS OS=Homo sapiens OX=9606 GN=FUS PE=1 SV=1	FUS	0.0316563	-0.127402	0.0388209	-2.18883	-1.15875	0.0151121	0.44611	1		0	undetermined
P27361	Mitogen-activated protein kinase 3 OS=Homo sapiens OX=9606 GN=MAPK3 PE=1 SV=4	MAPK3	-0.0208747	0.113765	-0.0797211	-2.18533	-1.15777	0.036056	0.189944	1		0	undetermined
P46783	40S ribosomal protein S10 OS=Homo sapiens OX=9606 GN=RPS10 PE=1 SV=1	RPS10	0.0426195	-0.105676	0.0752376	-2.17662	-1.15253	0.0431821	0.161919	1		0	undetermined
P49721	Proteasome subunit beta type-2 OS=Homo sapiens OX=9606 GN=PSMB2 PE=1 SV=1	PSMB2	-0.0427491	-0.00455762	0.147894	-2.17633	-1.15253	0.901109	0.00760737	1		0	undetermined
P46778	60S ribosomal protein L21 OS=Homo sapiens OX=9606 GN=RPL21 PE=1 SV=2	RPL21	0.102716	-0.0548535	0.12387	-2.17465	-1.1521	0.285448	0.0245143	1		0	undetermined
P60866	40S ribosomal protein S20 OS=Homo sapiens OX=9606 GN=RPS20 PE=1 SV=1	RPS20	0.0812985	-0.0326205	0.135997	-2.16314	-1.1443	0.515101	0.013855	1		0	undetermined
Q12765	Secernin-1 OS=Homo sapiens OX=9606 GN=SCRN1 PE=1 SV=2	SCRN1	0.0289355	-0.0675152	0.113887	-2.15802	-1.14247	0.191626	0.0380409	1		0	undetermined
P41091	Eukaryotic translation initiation factor 2 subunit 3 OS=Homo sapiens OX=9606 GN=EIF2S3 PE=1 SV=3	EIF2S3	-0.0131493	-0.115036	0.0593716	-2.15436	-1.14165	0.0279776	0.262187	1		0	undetermined
Q9NR09	Baculoviral IAP repeat-containing protein 6 OS=Homo sapiens OX=9606 GN=BIRC6 PE=1 SV=2	BIRC6	-0.108104	0.0278499	-0.148761	-2.14486	-1.13579	0.628436	0.0118063	1		0	undetermined
Q9Y5L0	Transportin-3 OS=Homo sapiens OX=9606 GN=TNPO3 PE=1 SV=3	TNPO3	-0.106918	0.125325	-0.0566623	-2.141	-1.13313	0.0207094	0.364105	1		0	undetermined
P62266	40S ribosomal protein S23 OS=Homo sapiens OX=9606 GN=RPS23 PE=1 SV=3	RPS23	0.0974909	-0.10781	0.0691765	-2.13459	-1.12912	0.0392083	0.196125	1		0	undetermined
Q7Z699	Sprouty-related, EVH1 domain-containing protein 1 OS=Homo sapiens OX=9606 GN=SPRED1 PE=1 SV=2	SPRED1	-0.0491581	0.0651194	-0.126926	-2.13167	-1.12832	0.236664	0.0326712	1		0	undetermined
Q05048	Cleavage stimulation factor subunit 1 OS=Homo sapiens OX=9606 GN=CSTF1 PE=1 SV=1	CSTF1	0.0207655	0.0373921	-0.143589	-2.1293	-1.12741	0.507326	0.0152051	1		0	undetermined
Q9HD42	Charged multivesicular body protein 1a OS=Homo sapiens OX=9606 GN=CHMP1A PE=1 SV=1	CHMP1A	0.0309103	-0.0549599	0.121186	-2.12325	-1.12372	0.284548	0.0276632	1		0	undetermined
P40692	DNA mismatch repair protein Mlh1 OS=Homo sapiens OX=9606 GN=MLH1 PE=1 SV=1	MLH1	-0.00113244	0.143623	-0.0057645	-2.12023	-1.12189	0.00789256	0.985924	1		0	undetermined
Q9Y256	CAAX prenyl protease 2 OS=Homo sapiens OX=9606 GN=RCE1 PE=1 SV=1	RCE1	-0.0581343	0.0301084	-0.146445	-2.11655	-1.12097	0.598669	0.0132351	1		0	undetermined
Q9BSV6	tRNA-splicing endonuclease subunit Sen34 OS=Homo sapiens OX=9606 GN=TSEN34 PE=1 SV=1	TSEN34	0.00954877	0.117715	-0.068186	-2.11556	-1.12097	0.029974	0.267405	1		0	undetermined
Q8TDZ2	[F-actin]-monooxygenase MICAL1 OS=Homo sapiens OX=9606 GN=MICAL1 PE=1 SV=2	MICAL1	0.0547599	0.133574	-0.035892	-2.11453	-1.12097	0.0135848	0.586159	1		0	undetermined
Q15758	Neutral amino acid transporter B(0) OS=Homo sapiens OX=9606 GN=SLC1A5 PE=1 SV=2	SLC1A5	-0.0111286	-0.0632774	0.114467	-2.1079	-1.11913	0.220104	0.03711	1		0	undetermined
P21964	Catechol O-methyltransferase OS=Homo sapiens OX=9606 GN=COMT PE=1 SV=2	COMT	0.0112105	0.143715	-0.00245074	-2.10702	-1.11913	0.00785208	0.967856	1		0	undetermined
Q7Z3C6	Autophagy-related protein 9A OS=Homo sapiens OX=9606 GN=ATG9A PE=1 SV=3	ATG9A	0.0568886	0.0674031	-0.123454	-2.0981	-1.11669	0.220115	0.0379498	1		0	undetermined
P60983	Glia maturation factor beta OS=Homo sapiens OX=9606 GN=GMFB PE=1 SV=2	GMFB	-0.0136448	-0.0268312	0.135486	-2.09398	-1.11669	0.587634	0.0142041	1		0	undetermined
Q9H992	E3 ubiquitin-protein ligase MARCH7 OS=Homo sapiens OX=9606 GN=MARCH7 PE=1 SV=1	MARCH7	0.0221932	0.0394199	-0.140719	-2.09092	-1.11669	0.483263	0.0174415	1		0	undetermined
Q04837	Single-stranded DNA-binding protein, mitochondrial OS=Homo sapiens OX=9606 GN=SSBP1 PE=1 SV=1	SSBP1	-0.100738	-0.102399	0.0731378	-2.08333	-1.11669	0.0499426	0.173219	1		0	undetermined
P20290	Transcription factor BTF3 OS=Homo sapiens OX=9606 GN=BTF3 PE=1 SV=1	BTF3	0.0890879	-0.13681	0.000437647	-2.0828	-1.11669	0.0091541	0.927652	1		0	undetermined
P83731	60S ribosomal protein L24 OS=Homo sapiens OX=9606 GN=RPL24 PE=1 SV=1	RPL24	0.0613762	-0.118525	0.0466514	-2.07779	-1.11669	0.0236309	0.368744	1		0	undetermined
Q6UXH1	Protein disulfide isomerase CRELD2 OS=Homo sapiens OX=9606 GN=CRELD2 PE=1 SV=1	CRELD2	0.0117209	-0.136366	0.00109544	-2.0766	-1.11669	0.00937959	0.918518	1		0	undetermined
O43815	Striatin OS=Homo sapiens OX=9606 GN=STRN PE=1 SV=4	STRN	0.0440741	-0.0213905	0.137055	-2.07606	-1.11669	0.659819	0.0131564	1		0	undetermined
O00220	Tumor necrosis factor receptor superfamily member 10A OS=Homo sapiens OX=9606 GN=TNFRSF10A PE=1 SV=3	TNFRSF10A	-0.0940991	0.0468026	-0.135939	-2.07569	-1.11669	0.401125	0.0218084	1		0	undetermined
Q9H8M7	Ubiquitin carboxyl-terminal hydrolase MINDY-3 OS=Homo sapiens OX=9606 GN=MINDY3 PE=1 SV=1	MINDY3	-0.0588404	0.0123145	-0.151404	-2.06977	-1.11292	0.847447	0.0103446	1		0	undetermined
P49903	Selenide, water dikinase 1 OS=Homo sapiens OX=9606 GN=SEPHS1 PE=1 SV=2	SEPHS1	0.0160965	-0.011382	0.139749	-2.04815	-1.09749	0.800783	0.0115172	1		0	undetermined
Q5VV42	Threonylcarbamoyladenosine tRNA methylthiotransferase OS=Homo sapiens OX=9606 GN=CDKAL1 PE=1 SV=1	CDKAL1	-0.0748284	-0.0197628	0.136428	-2.04797	-1.09749	0.682088	0.0135664	1		0	undetermined
P61254	60S ribosomal protein L26 OS=Homo sapiens OX=9606 GN=RPL26 PE=1 SV=1	RPL26	0.151324	-0.112354	0.0549197	-2.04422	-1.0948	0.031772	0.296765	1		0	undetermined
P67870	Casein kinase II subunit beta OS=Homo sapiens OX=9606 GN=CSNK2B PE=1 SV=1	CSNK2B	0.0387913	-0.049342	0.120623	-2.04077	-1.0924	0.334681	0.0283659	1		0	undetermined
Q96JP5	E3 ubiquitin-protein ligase ZFP91 OS=Homo sapiens OX=9606 GN=ZFP91 PE=1 SV=1	ZFP91	0.050414	-0.108521	0.0607076	-2.03785	-1.09052	0.0379549	0.252377	1		0	undetermined
P43487	Ran-specific GTPase-activating protein OS=Homo sapiens OX=9606 GN=RANBP1 PE=1 SV=1	RANBP1	0.100244	-0.109409	0.0583343	-2.026	-1.08696	0.0364374	0.269984	1		0	undetermined
P48436	Transcription factor SOX-9 OS=Homo sapiens OX=9606 GN=SOX9 PE=1 SV=1	SOX9	0.159275	-0.000880331	0.142129	-2.02136	-1.08519	0.95594	0.0102223	1		0	undetermined
Q9NRX1	RNA-binding protein PNO1 OS=Homo sapiens OX=9606 GN=PNO1 PE=1 SV=1	PNO1	-0.0298867	0.107927	-0.0760317	-2.02013	-1.08519	0.0469517	0.212677	1		0	undetermined
P53611	Geranylgeranyl transferase type-2 subunit beta OS=Homo sapiens OX=9606 GN=RABGGTB PE=1 SV=2	RABGGTB	-0.052526	0.128265	-0.0382607	-2.0169	-1.08296	0.0178641	0.557992	1		0	undetermined
Q01844	RNA-binding protein EWS OS=Homo sapiens OX=9606 GN=EWSR1 PE=1 SV=1	EWSR1	-0.00717003	-0.108501	0.0589823	-2.0158	-1.08288	0.0379905	0.265095	1		0	undetermined
P31949	Protein S100-A11 OS=Homo sapiens OX=9606 GN=S100A11 PE=1 SV=2	S100A11	-0.0861365	-0.00789281	0.13924	-2.00971	-1.08234	0.851776	0.0118121	1		0	undetermined
Q9NPF0	CD320 antigen OS=Homo sapiens OX=9606 GN=CD320 PE=1 SV=1	CD320	0.00412469	0.0658564	-0.119829	-2.00957	-1.08234	0.23123	0.0442187	1		0	undetermined
P62910	60S ribosomal protein L32 OS=Homo sapiens OX=9606 GN=RPL32 PE=1 SV=2	RPL32	0.0698961	-0.0431318	0.122758	-2.00797	-1.08234	0.396337	0.0257789	1		0	undetermined
Q9Y618	Nuclear receptor corepressor 2 OS=Homo sapiens OX=9606 GN=NCOR2 PE=1 SV=3	NCOR2	-0.00735485	-0.109486	0.0566966	-2.00742	-1.08234	0.0363085	0.282614	1		0	undetermined
Q6SJ93	Protein FAM111B OS=Homo sapiens OX=9606 GN=FAM111B PE=1 SV=1	FAM111B	0.0692901	0.0133476	-0.14808	-2.00552	-1.08234	0.83229	0.0122112	1		0	undetermined
O75964	ATP synthase subunit g, mitochondrial OS=Homo sapiens OX=9606 GN=ATP5MG PE=1 SV=3	ATP5MG	-0.0448721	0.128355	-0.0362224	-2.0001	-1.07818	0.017783	0.582191	1		0	undetermined
P14854	Cytochrome c oxidase subunit 6B1 OS=Homo sapiens OX=9606 GN=COX6B1 PE=1 SV=2	COX6B1	0.0133284	-0.0539188	0.115186	-1.99483	-1.07389	0.293432	0.0359814	1		0	undetermined
Q96PE3	Inositol polyphosphate-4-phosphatase type I A OS=Homo sapiens OX=9606 GN=INPP4A PE=1 SV=1	INPP4A	-0.0975909	0.0555746	-0.125891	-1.98574	-1.06579	0.315264	0.0341739	1		0	undetermined
Q9C0E2	Exportin-4 OS=Homo sapiens OX=9606 GN=XPO4 PE=1 SV=2	XPO4	-0.146209	0.109997	-0.0696297	-1.97783	-1.06236	0.0428082	0.256668	1		0	undetermined
P54886	Delta-1-pyrroline-5-carboxylate synthase OS=Homo sapiens OX=9606 GN=ALDH18A1 PE=1 SV=2	ALDH18A1	-0.0907299	-0.0277186	0.129173	-1.9713	-1.06236	0.576214	0.0191966	1		0	undetermined
Q15386	Ubiquitin-protein ligase E3C OS=Homo sapiens OX=9606 GN=UBE3C PE=1 SV=3	UBE3C	-0.0497519	0.0607553	-0.12136	-1.96828	-1.06236	0.270695	0.0414711	1		0	undetermined
P51617	Interleukin-1 receptor-associated kinase 1 OS=Homo sapiens OX=9606 GN=IRAK1 PE=1 SV=2	IRAK1	-0.0548256	-0.0429451	0.120554	-1.9627	-1.06236	0.39829	0.0284531	1		0	undetermined
P31946	14-3-3 protein beta/alpha OS=Homo sapiens OX=9606 GN=YWHAB PE=1 SV=3	YWHAB	0.108367	-0.0355099	0.124771	-1.96259	-1.06236	0.480723	0.0235301	1		0	undetermined
Q9NV70	Exocyst complex component 1 OS=Homo sapiens OX=9606 GN=EXOC1 PE=1 SV=4	EXOC1	-0.0756199	0.135308	-0.0116829	-1.96235	-1.06236	0.0123987	0.903592	1		0	undetermined
Q49B96	Cytochrome c oxidase assembly protein COX19 OS=Homo sapiens OX=9606 GN=COX19 PE=1 SV=1	COX19	0.0650107	-0.017481	0.133277	-1.96133	-1.06236	0.713772	0.0158028	1		0	undetermined
Q99643	Succinate dehydrogenase cytochrome b560 subunit, mitochondrial OS=Homo sapiens OX=9606 GN=SDHC PE=1 SV=1	SDHC	0.0359709	0.137157	-0.00106666	-1.96041	-1.06236	0.0112355	0.948574	1		0	undetermined
Q9Y3S2	Zinc finger protein 330 OS=Homo sapiens OX=9606 GN=ZNF330 PE=1 SV=1	ZNF330	0.105441	-0.103579	0.0620672	-1.95786	-1.06236	0.0474122	0.242659	1		0	undetermined
Q9BRT3	Migration and invasion enhancer 1 OS=Homo sapiens OX=9606 GN=MIEN1 PE=1 SV=1	MIEN1	-0.158016	-0.0504951	0.115523	-1.95757	-1.06236	0.323952	0.0354642	1		0	undetermined
Q08AF3	Schlafen family member 5 OS=Homo sapiens OX=9606 GN=SLFN5 PE=1 SV=1	SLFN5	-0.0708106	0.0637433	-0.118394	-1.95444	-1.06209	0.247052	0.0469297	1		0	undetermined
Q96BN8	Ubiquitin thioesterase otulin OS=Homo sapiens OX=9606 GN=OTULIN PE=1 SV=3	OTULIN	0.0741385	0.0106039	-0.146189	-1.94394	-1.05589	0.872664	0.0134017	1		0	undetermined
P55145	Mesencephalic astrocyte-derived neurotrophic factor OS=Homo sapiens OX=9606 GN=MANF PE=1 SV=3	MANF	0.026623	-0.0158971	0.132881	-1.93942	-1.05483	0.736065	0.0161056	1		0	undetermined
Q9C0C2	182 kDa tankyrase-1-binding protein OS=Homo sapiens OX=9606 GN=TNKS1BP1 PE=1 SV=4	TNKS1BP1	0.0337583	-0.106106	0.056343	-1.9358	-1.05313	0.0423546	0.285393	1		0	undetermined
Q5JTJ3	Cytochrome c oxidase assembly factor 6 homolog OS=Homo sapiens OX=9606 GN=COA6 PE=1 SV=1	COA6	0.01994	-0.0431247	0.118989	-1.93456	-1.05313	0.396411	0.0304932	1		0	undetermined
Q8WVT3	Trafficking protein particle complex subunit 12 OS=Homo sapiens OX=9606 GN=TRAPPC12 PE=1 SV=3	TRAPPC12	-0.01235	0.130332	-0.0229332	-1.93157	-1.05255	0.0160748	0.750613	1		0	undetermined
Q9HBH1	Peptide deformylase, mitochondrial OS=Homo sapiens OX=9606 GN=PDF PE=1 SV=1	PDF	-0.0280033	0.117067	-0.053501	-1.93129	-1.05255	0.0309079	0.394049	1		0	undetermined
P11940	Polyadenylate-binding protein 1 OS=Homo sapiens OX=9606 GN=PABPC1 PE=1 SV=2	PABPC1	0.0369584	-0.0519071	0.112864	-1.92573	-1.05017	0.311123	0.0397309	1		0	undetermined
P59998	Actin-related protein 2/3 complex subunit 4 OS=Homo sapiens OX=9606 GN=ARPC4 PE=1 SV=3	ARPC4	-0.0239827	0.0393137	-0.132467	-1.92319	-1.05017	0.484508	0.0255501	1		0	undetermined
Q9UBI1	COMM domain-containing protein 3 OS=Homo sapiens OX=9606 GN=COMMD3 PE=1 SV=1	COMMD3	0.0230584	0.109452	-0.0659441	-1.92155	-1.05017	0.0438683	0.284683	1		0	undetermined
Q13438	Protein OS-9 OS=Homo sapiens OX=9606 GN=OS9 PE=1 SV=1	OS9	0.0539107	-0.115394	0.0381901	-1.92103	-1.05017	0.0275014	0.452721	1		0	undetermined
P61020	Ras-related protein Rab-5B OS=Homo sapiens OX=9606 GN=RAB5B PE=1 SV=1	RAB5B	-0.0209438	0.062418	-0.11742	-1.91894	-1.04939	0.257353	0.0488502	1		0	undetermined
Q1KMD3	Heterogeneous nuclear ribonucleoprotein U-like protein 2 OS=Homo sapiens OX=9606 GN=HNRNPUL2 PE=1 SV=1	HNRNPUL2	0.0261761	0.127478	-0.0279133	-1.90838	-1.04801	0.0185906	0.685547	1		0	undetermined
P61225	Ras-related protein Rap-2b OS=Homo sapiens OX=9606 GN=RAP2B PE=1 SV=1	RAP2B	-0.0728469	0.0352669	-0.133486	-1.90101	-1.04488	0.533202	0.0243979	1		0	undetermined
O75818	Ribonuclease P protein subunit p40 OS=Homo sapiens OX=9606 GN=RPP40 PE=1 SV=3	RPP40	-0.00895749	0.0484505	-0.125804	-1.89716	-1.04359	0.384005	0.0343038	1		0	undetermined
Q9UNN8	Endothelial protein C receptor OS=Homo sapiens OX=9606 GN=PROCR PE=1 SV=1	PROCR	0.00803343	0.128964	-0.0220101	-1.89387	-1.04198	0.0172405	0.762888	1		0	undetermined
Q9Y3X0	Coiled-coil domain-containing protein 9 OS=Homo sapiens OX=9606 GN=CCDC9 PE=1 SV=1	CCDC9	0.128597	-0.0409921	0.1179	-1.88917	-1.0398	0.419075	0.0319857	1		0	undetermined
P61158	Actin-related protein 3 OS=Homo sapiens OX=9606 GN=ACTR3 PE=1 SV=3	ACTR3	0.0142322	0.115623	-0.0515225	-1.88041	-1.03588	0.0330761	0.413527	1		0	undetermined
O00567	Nucleolar protein 56 OS=Homo sapiens OX=9606 GN=NOP56 PE=1 SV=4	NOP56	0.025112	0.111625	-0.0586737	-1.87875	-1.03588	0.039769	0.345814	1		0	undetermined
Q9Y237	Peptidyl-prolyl cis-trans isomerase NIMA-interacting 4 OS=Homo sapiens OX=9606 GN=PIN4 PE=1 SV=1	PIN4	-0.118818	-0.0491338	0.112189	-1.87853	-1.03588	0.336642	0.0408821	1		0	undetermined
Q6IA86	Elongator complex protein 2 OS=Homo sapiens OX=9606 GN=ELP2 PE=1 SV=2	ELP2	-0.0157451	0.0050938	-0.144872	-1.87606	-1.03496	0.954651	0.0142901	1		0	undetermined
Q9NQP4	Prefoldin subunit 4 OS=Homo sapiens OX=9606 GN=PFDN4 PE=1 SV=1	PFDN4	0.0799833	-0.022228	0.126927	-1.87343	-1.03397	0.648476	0.0213122	1		0	undetermined
Q14764	Major vault protein OS=Homo sapiens OX=9606 GN=MVP PE=1 SV=4	MVP	0.113176	-0.0262664	0.124974	-1.87241	-1.03376	0.594955	0.0233129	1		0	undetermined
Q9BSL1	Ubiquitin-associated domain-containing protein 1 OS=Homo sapiens OX=9606 GN=UBAC1 PE=1 SV=1	UBAC1	-0.0819488	0.106828	-0.0654979	-1.86523	-1.02902	0.0492859	0.288209	1		0	undetermined
P53985	Monocarboxylate transporter 1 OS=Homo sapiens OX=9606 GN=SLC16A1 PE=1 SV=3	SLC16A1	0.00233298	0.106557	-0.0658059	-1.86377	-1.02837	0.0498757	0.285772	1		0	undetermined
Q9Y5J7	Mitochondrial import inner membrane translocase subunit Tim9 OS=Homo sapiens OX=9606 GN=TIMM9 PE=1 SV=1	TIMM9	-0.0223182	-0.116751	0.0291796	-1.86122	-1.02824	0.0257609	0.552953	1		0	undetermined
Q9UNX4	WD repeat-containing protein 3 OS=Homo sapiens OX=9606 GN=WDR3 PE=1 SV=1	WDR3	0.00440457	0.00932168	-0.142472	-1.85599	-1.02613	0.891654	0.0160439	1		0	undetermined
O43169	Cytochrome b5 type B OS=Homo sapiens OX=9606 GN=CYB5B PE=1 SV=3	CYB5B	0.0440904	-0.113564	0.0354394	-1.85511	-1.02613	0.0300088	0.482185	1		0	undetermined
Q14011	Cold-inducible RNA-binding protein OS=Homo sapiens OX=9606 GN=CIRBP PE=1 SV=1	CIRBP	0.00113877	-0.118487	0.0237487	-1.84873	-1.02214	0.0236746	0.618214	1		0	undetermined
Q96C86	m7GpppX diphosphatase OS=Homo sapiens OX=9606 GN=DCPS PE=1 SV=2	DCPS	0.0267438	0.121742	-0.034631	-1.84235	-1.01947	0.0247039	0.601418	1		0	undetermined
P05412	Transcription factor AP-1 OS=Homo sapiens OX=9606 GN=JUN PE=1 SV=2	JUN	-0.0487535	0.0250627	-0.135468	-1.84212	-1.01947	0.666015	0.0222865	1		0	undetermined
P61313	60S ribosomal protein L15 OS=Homo sapiens OX=9606 GN=RPL15 PE=1 SV=2	RPL15	0.176641	-0.0364065	0.117862	-1.83754	-1.01724	0.470314	0.0320393	1		0	undetermined
P60981	Destrin OS=Homo sapiens OX=9606 GN=DSTN PE=1 SV=3	DSTN	-0.094862	0.0362688	-0.129251	-1.82847	-1.01271	0.52092	0.0294992	1		0	undetermined
Q13526	Peptidyl-prolyl cis-trans isomerase NIMA-interacting 1 OS=Homo sapiens OX=9606 GN=PIN1 PE=1 SV=1	PIN1	-0.0470312	-0.0163915	0.127168	-1.82642	-1.01271	0.729082	0.0210753	1		0	undetermined
Q96EY4	Translation machinery-associated protein 16 OS=Homo sapiens OX=9606 GN=TMA16 PE=1 SV=2	TMA16	-0.0369719	-0.0425746	0.11359	-1.82607	-1.01271	0.402185	0.0385259	1		0	undetermined
Q8IW35	Centrosomal protein of 97 kDa OS=Homo sapiens OX=9606 GN=CEP97 PE=1 SV=1	CEP97	-0.0206425	0.0546909	-0.117839	-1.82604	-1.01271	0.323322	0.0480158	1		0	undetermined
P08621	U1 small nuclear ribonucleoprotein 70 kDa OS=Homo sapiens OX=9606 GN=SNRNP70 PE=1 SV=2	SNRNP70	-0.0042584	-0.118466	0.0206452	-1.82139	-1.00883	0.0236991	0.656955	1		0	undetermined
O43670	BUB3-interacting and GLEBS motif-containing protein ZNF207 OS=Homo sapiens OX=9606 GN=ZNF207 PE=1 SV=1	ZNF207	-0.0955332	0.0130293	-0.139163	-1.81572	-1.00791	0.836954	0.01877	1		0	undetermined
Q9NQ50	39S ribosomal protein L40, mitochondrial OS=Homo sapiens OX=9606 GN=MRPL40 PE=1 SV=1	MRPL40	-0.0259826	0.107979	-0.0584638	-1.80483	-1.00288	0.0468443	0.347695	1		0	undetermined
Q9H9A5	CCR4-NOT transcription complex subunit 10 OS=Homo sapiens OX=9606 GN=CNOT10 PE=1 SV=1	CNOT10	0.0615334	0.0248218	-0.133574	-1.80222	-1.00176	0.669306	0.0243006	1		0	undetermined
P53007	Tricarboxylate transport protein, mitochondrial OS=Homo sapiens OX=9606 GN=SLC25A1 PE=1 SV=2	SLC25A1	-0.0265489	-0.114083	0.028655	-1.8005	-1.00079	0.029278	0.559107	1		0	undetermined
Q9UP83	Conserved oligomeric Golgi complex subunit 5 OS=Homo sapiens OX=9606 GN=COG5 PE=1 SV=3	COG5	-0.0203387	0.129719	-0.000495804	-1.79532	-0.99784	0.0165882	0.94063	1		0	undetermined
Q9NXV2	BTB/POZ domain-containing protein KCTD5 OS=Homo sapiens OX=9606 GN=KCTD5 PE=1 SV=1	KCTD5	0.00763178	0.0122475	-0.137977	-1.78549	-0.993904	0.848431	0.0198413	1		0	undetermined
Q9BTE7	DCN1-like protein 5 OS=Homo sapiens OX=9606 GN=DCUN1D5 PE=1 SV=1	DCUN1D5	-0.123421	0.0128855	-0.136918	-1.76895	-0.983174	0.839062	0.0208433	1		0	undetermined
O14579	Coatomer subunit epsilon OS=Homo sapiens OX=9606 GN=COPE PE=1 SV=3	COPE	-0.0804459	0.108968	-0.0530542	-1.76408	-0.981891	0.044828	0.398398	1		0	undetermined
Q9BTX7	Alpha-tocopherol transfer protein-like OS=Homo sapiens OX=9606 GN=TTPAL PE=1 SV=2	TTPAL	-0.0270093	0.107278	-0.0558328	-1.76174	-0.980912	0.0483186	0.371821	1		0	undetermined
P41208	Centrin-2 OS=Homo sapiens OX=9606 GN=CETN2 PE=1 SV=1	CETN2	-0.153452	0.0379267	-0.124836	-1.76167	-0.980912	0.500921	0.0357672	1		0	undetermined
Q969G5	Caveolae-associated protein 3 OS=Homo sapiens OX=9606 GN=CAVIN3 PE=1 SV=3	CAVIN3	-0.0416868	0.0482174	-0.118151	-1.75316	-0.978768	0.386399	0.0474032	1		0	undetermined
P62841	40S ribosomal protein S15 OS=Homo sapiens OX=9606 GN=RPS15 PE=1 SV=2	RPS15	0.0111251	-0.109121	0.0339372	-1.74973	-0.978663	0.0369247	0.498707	1		0	undetermined
Q99627	COP9 signalosome complex subunit 8 OS=Homo sapiens OX=9606 GN=COPS8 PE=1 SV=1	COPS8	0.0114356	0.111166	-0.0474954	-1.7488	-0.978663	0.0406071	0.454888	1		0	undetermined
Q9UNZ2	NSFL1 cofactor p47 OS=Homo sapiens OX=9606 GN=NSFL1C PE=1 SV=2	NSFL1C	-0.0191371	-0.110047	0.0317855	-1.74746	-0.978663	0.0353811	0.522885	1		0	undetermined
Q86UK7	E3 ubiquitin-protein ligase ZNF598 OS=Homo sapiens OX=9606 GN=ZNF598 PE=1 SV=1	ZNF598	0.0478343	0.0403017	-0.122155	-1.73704	-0.972378	0.472996	0.0401032	1		0	undetermined
Q8N3D4	EH domain-binding protein 1-like protein 1 OS=Homo sapiens OX=9606 GN=EHBP1L1 PE=1 SV=2	EHBP1L1	-0.0181201	0.119191	-0.0282906	-1.73388	-0.969906	0.0279407	0.680704	1		0	undetermined
Q15654	Thyroid receptor-interacting protein 6 OS=Homo sapiens OX=9606 GN=TRIP6 PE=1 SV=3	TRIP6	0.0345772	-0.104815	0.0404808	-1.73099	-0.967699	0.0448789	0.42898	1		0	undetermined
P09110	3-ketoacyl-CoA thiolase, peroxisomal OS=Homo sapiens OX=9606 GN=ACAA1 PE=1 SV=2	ACAA1	0.0360606	-0.11531	0.0159995	-1.71623	-0.956356	0.0276126	0.716686	1		0	undetermined
Q9UKV5	E3 ubiquitin-protein ligase AMFR OS=Homo sapiens OX=9606 GN=AMFR PE=1 SV=2	AMFR	-0.0222029	0.0106786	-0.135047	-1.71452	-0.956314	0.871561	0.0227204	1		0	undetermined
Q9BW85	Splicing factor YJU2 OS=Homo sapiens OX=9606 GN=YJU2 PE=1 SV=1	YJU2	-0.0433023	0.0458097	-0.117391	-1.7116	-0.956314	0.411658	0.0489084	1		0	undetermined
P11441	Ubiquitin-like protein 4A OS=Homo sapiens OX=9606 GN=UBL4A PE=1 SV=1	UBL4A	-0.0304335	-0.00403415	0.12626	-1.71039	-0.956314	0.908891	0.0219773	1		0	undetermined
Q96EP0	E3 ubiquitin-protein ligase RNF31 OS=Homo sapiens OX=9606 GN=RNF31 PE=1 SV=1	RNF31	0.00816653	0.0187802	-0.131215	-1.70323	-0.952877	0.753735	0.0270286	1		0	undetermined
Q9UBV2	Protein sel-1 homolog 1 OS=Homo sapiens OX=9606 GN=SEL1L PE=1 SV=3	SEL1L	0.0398321	0.0217955	-0.12981	-1.70165	-0.952877	0.711154	0.0287771	1		0	undetermined
P50747	Biotin--protein ligase OS=Homo sapiens OX=9606 GN=HLCS PE=1 SV=1	HLCS	0.0497914	0.0299925	-0.125256	-1.68973	-0.949127	0.60018	0.0351262	1		0	undetermined
P21333	Filamin-A OS=Homo sapiens OX=9606 GN=FLNA PE=1 SV=4	FLNA	0.0670005	-0.0322106	0.111238	-1.66932	-0.93933	0.520079	0.0425499	1		0	undetermined
Q9UK41	Vacuolar protein sorting-associated protein 28 homolog OS=Homo sapiens OX=9606 GN=VPS28 PE=1 SV=1	VPS28	0.00331144	0.0408188	-0.118117	-1.66901	-0.93933	0.467032	0.0474693	1		0	undetermined
Q99871	HAUS augmin-like complex subunit 7 OS=Homo sapiens OX=9606 GN=HAUS7 PE=1 SV=3	HAUS7	0.0319161	-0.106134	0.031267	-1.66453	-0.938002	0.042302	0.528801	1		0	undetermined
Q99417	c-Myc-binding protein OS=Homo sapiens OX=9606 GN=MYCBP PE=1 SV=3	MYCBP	-0.00891073	-0.0152013	0.119252	-1.66032	-0.936308	0.745929	0.0301412	1		0	undetermined
Q8N2K0	Lysophosphatidylserine lipase ABHD12 OS=Homo sapiens OX=9606 GN=ABHD12 PE=1 SV=2	ABHD12	-0.0189618	0.108391	-0.0438779	-1.65807	-0.934684	0.0459951	0.49395	1		0	undetermined
Q12792	Twinfilin-1 OS=Homo sapiens OX=9606 GN=TWF1 PE=1 SV=3	TWF1	-0.0481934	-0.116593	0.00331118	-1.64824	-0.929997	0.0259593	0.887837	1		0	undetermined
Q53GS9	U4/U6.U5 tri-snRNP-associated protein 2 OS=Homo sapiens OX=9606 GN=USP39 PE=1 SV=2	USP39	-0.034118	0.116295	-0.0247144	-1.64485	-0.928276	0.0320513	0.727108	1		0	undetermined
O75251	NADH dehydrogenase [ubiquinone] iron-sulfur protein 7, mitochondrial OS=Homo sapiens OX=9606 GN=NDUFS7 PE=1 SV=3	NDUFS7	0.0247353	0.0035033	-0.133942	-1.64115	-0.926758	0.978445	0.0238975	1		0	undetermined
O75369	Filamin-B OS=Homo sapiens OX=9606 GN=FLNB PE=1 SV=2	FLNB	0.019448	-0.0315166	0.109895	-1.63771	-0.926758	0.528565	0.0450036	1		0	undetermined
Q7L5Y1	Mitochondrial enolase superfamily member 1 OS=Homo sapiens OX=9606 GN=ENOSF1 PE=1 SV=1	ENOSF1	0.0540852	0.120108	-0.0130184	-1.63673	-0.926758	0.0267376	0.885126	1		0	undetermined
Q06323	Proteasome activator complex subunit 1 OS=Homo sapiens OX=9606 GN=PSME1 PE=1 SV=1	PSME1	0.00565965	-0.0101637	0.1193	-1.62012	-0.915435	0.818504	0.0300777	1		0	undetermined
Q9Y5M8	Signal recognition particle receptor subunit beta OS=Homo sapiens OX=9606 GN=SRPRB PE=1 SV=3	SRPRB	0.112512	-0.0262357	0.111602	-1.61632	-0.914716	0.595354	0.0419041	1		0	undetermined
P62942	Peptidyl-prolyl cis-trans isomerase FKBP1A OS=Homo sapiens OX=9606 GN=FKBP1A PE=1 SV=2	FKBP1A	-0.0608954	-0.108032	0.0218063	-1.61617	-0.914716	0.0388139	0.642345	1		0	undetermined
Q9UPQ9	Trinucleotide repeat-containing gene 6B protein OS=Homo sapiens OX=9606 GN=TNRC6B PE=1 SV=4	TNRC6B	0.0766351	-0.0129383	0.117618	-1.61025	-0.911974	0.778295	0.0323823	1		0	undetermined
Q9Y5K6	CD2-associated protein OS=Homo sapiens OX=9606 GN=CD2AP PE=1 SV=1	CD2AP	0.00270719	-0.018474	0.115128	-1.61018	-0.911974	0.699919	0.0360713	1		0	undetermined
P30043	Flavin reductase (NADPH) OS=Homo sapiens OX=9606 GN=BLVRB PE=1 SV=3	BLVRB	-0.0364064	-0.106342	0.0248452	-1.60937	-0.911974	0.0419061	0.604768	1		0	undetermined
P50502	Hsc70-interacting protein OS=Homo sapiens OX=9606 GN=ST13 PE=1 SV=2	ST13	0.0600945	-0.0124595	0.117577	-1.60555	-0.911166	0.785194	0.0324411	1		0	undetermined
P51784	Ubiquitin carboxyl-terminal hydrolase 11 OS=Homo sapiens OX=9606 GN=USP11 PE=1 SV=3	USP11	0.0233234	0.0313526	-0.119139	-1.58995	-0.900846	0.58255	0.0455046	1		0	undetermined
Q5SXM8	DNL-type zinc finger protein OS=Homo sapiens OX=9606 GN=DNLZ PE=1 SV=1	DNLZ	-0.0363453	-0.113933	0.000665214	-1.57476	-0.895314	0.0294879	0.924491	1		0	undetermined
P0DN79	Cystathionine beta-synthase-like protein OS=Homo sapiens OX=9606 GN=CBSL PE=1 SV=1	CBSL	-0.030505	0.119784	-0.00323398	-1.56508	-0.88957	0.027157	0.978777	1		0	undetermined
P78324	Tyrosine-protein phosphatase non-receptor type substrate 1 OS=Homo sapiens OX=9606 GN=SIRPA PE=1 SV=2	SIRPA	-0.0135848	-0.108949	0.012626	-1.55942	-0.887131	0.037217	0.761198	1		0	undetermined
Q9Y3I0	tRNA-splicing ligase RtcB homolog OS=Homo sapiens OX=9606 GN=RTCB PE=1 SV=1	RTCB	0.0679126	-0.0255398	0.108759	-1.55798	-0.886544	0.604435	0.047171	1		0	undetermined
P49257	Protein ERGIC-53 OS=Homo sapiens OX=9606 GN=LMAN1 PE=1 SV=2	LMAN1	0.0281307	-0.0194606	0.111512	-1.55188	-0.884315	0.686254	0.042064	1		0	undetermined
O60925	Prefoldin subunit 1 OS=Homo sapiens OX=9606 GN=PFDN1 PE=1 SV=2	PFDN1	0.0272236	-0.10371	0.0240698	-1.55116	-0.884315	0.0471381	0.614263	1		0	undetermined
Q96ST3	Paired amphipathic helix protein Sin3a OS=Homo sapiens OX=9606 GN=SIN3A PE=1 SV=2	SIN3A	-0.0975871	-0.106144	0.018415	-1.55018	-0.884315	0.042282	0.685384	1		0	undetermined
Q6NYC8	Phostensin OS=Homo sapiens OX=9606 GN=PPP1R18 PE=1 SV=1	PPP1R18	-0.010699	-0.107257	0.0133954	-1.53172	-0.873579	0.0402064	0.75097	1		0	undetermined
P18077	60S ribosomal protein L35a OS=Homo sapiens OX=9606 GN=RPL35A PE=1 SV=2	RPL35A	0.158159	-0.10408	0.0200463	-1.52356	-0.870407	0.0463714	0.664543	1		0	undetermined
P55196	Afadin OS=Homo sapiens OX=9606 GN=AFDN PE=1 SV=3	AFDN	0.0491928	-0.105441	0.0154528	-1.51226	-0.864653	0.0436403	0.723838	1		0	undetermined
Q96AG4	Leucine-rich repeat-containing protein 59 OS=Homo sapiens OX=9606 GN=LRRC59 PE=1 SV=1	LRRC59	0.095209	-0.0181857	0.109912	-1.51147	-0.864653	0.703931	0.0449724	1		0	undetermined
Q02750	Dual specificity mitogen-activated protein kinase kinase 1 OS=Homo sapiens OX=9606 GN=MAP2K1 PE=1 SV=2	MAP2K1	0.0352809	0.112219	-0.0173871	-1.50657	-0.860796	0.0387068	0.825201	1		0	undetermined
O75915	PRA1 family protein 3 OS=Homo sapiens OX=9606 GN=ARL6IP5 PE=1 SV=1	ARL6IP5	-0.0030626	0.115261	-0.00728537	-1.49847	-0.857657	0.0336397	0.964717	1		0	undetermined
P35613	Basigin OS=Homo sapiens OX=9606 GN=BSG PE=1 SV=2	BSG	0.137175	-0.00874318	0.113084	-1.49176	-0.856313	0.839283	0.0393621	1		0	undetermined
Q14241	Elongin-A OS=Homo sapiens OX=9606 GN=ELOA PE=1 SV=2	ELOA	-0.0315429	-0.107417	0.00636019	-1.48219	-0.853077	0.0399161	0.8459	1		0	undetermined
Q5TDH0	Protein DDI1 homolog 2 OS=Homo sapiens OX=9606 GN=DDI2 PE=1 SV=1	DDI2	0.00448036	-0.00116289	0.115015	-1.47197	-0.847867	0.951716	0.0362472	1		0	undetermined
Q96B49	Mitochondrial import receptor subunit TOM6 homolog OS=Homo sapiens OX=9606 GN=TOMM6 PE=1 SV=1	TOMM6	-0.0822735	0.00877676	-0.121805	-1.44637	-0.833785	0.899744	0.0407009	1		0	undetermined
Q9GZT3	SRA stem-loop-interacting RNA-binding protein, mitochondrial OS=Homo sapiens OX=9606 GN=SLIRP PE=1 SV=1	SLIRP	-0.0498377	-0.00722385	0.107811	-1.38424	-0.806529	0.861631	0.0490474	1		0	undetermined
P31483	Nucleolysin TIA-1 isoform p40 OS=Homo sapiens OX=9606 GN=TIA1 PE=1 SV=3	TIA1	-0.0272162	0.00344084	-0.11972	-1.37068	-0.801378	0.97938	0.0444195	1		0	undetermined
Q9H6F5	Coiled-coil domain-containing protein 86 OS=Homo sapiens OX=9606 GN=CCDC86 PE=1 SV=1	CCDC86	0.0826258	-0.103218	0.00172503	-1.36798	-0.799557	0.0481746	0.909786	1		0	undetermined
Q99653	Calcineurin B homologous protein 1 OS=Homo sapiens OX=9606 GN=CHP1 PE=1 SV=3	CHP1	-0.114937	0.107112	-0.00584463	-1.32838	-0.781028	0.0486745	0.984806	1		0	undetermined
O95793	Double-stranded RNA-binding protein Staufen homolog 1 OS=Homo sapiens OX=9606 GN=STAU1 PE=1 SV=2	STAU1	0.0366648	-0.0927706	0.103194	-2.37641	-1.26435	0.0751166	0.0591002	0		0	undetermined
P53384	Cytosolic Fe-S cluster assembly factor NUBP1 OS=Homo sapiens OX=9606 GN=NUBP1 PE=1 SV=2	NUBP1	-0.0116158	0.0957373	-0.112097	-2.34511	-1.24918	0.0787526	0.0605415	0	Warning: high variance	0	undetermined
P15848	Arylsulfatase B OS=Homo sapiens OX=9606 GN=ARSB PE=1 SV=1	ARSB	0.0455978	0.0992844	-0.10709	-2.32359	-1.23678	0.0680706	0.0735696	0	Warning: high variance	0	undetermined
Q96C19	EF-hand domain-containing protein D2 OS=Homo sapiens OX=9606 GN=EFHD2 PE=1 SV=1	EFHD2	-0.0428486	-0.101459	0.0897012	-2.31266	-1.23005	0.0520402	0.0986286	0		0	undetermined
P63098	Calcineurin subunit B type 1 OS=Homo sapiens OX=9606 GN=PPP3R1 PE=1 SV=2	PPP3R1	-0.0467558	-0.0926444	0.0986966	-2.29695	-1.22294	0.0755053	0.070479	0		0	undetermined
Q14247	Src substrate cortactin OS=Homo sapiens OX=9606 GN=CTTN PE=1 SV=2	CTTN	0.0115064	-0.0917433	0.0974012	-2.25906	-1.19832	0.0783276	0.0740719	0		0	undetermined
Q92820	Gamma-glutamyl hydrolase OS=Homo sapiens OX=9606 GN=GGH PE=1 SV=2	GGH	-0.0936229	0.0838843	-0.115042	-2.19515	-1.15875	0.124655	0.0538166	0	Warning: high variance	0	undetermined
P38646	Stress-70 protein, mitochondrial OS=Homo sapiens OX=9606 GN=HSPA9 PE=1 SV=2	HSPA9	0.137039	-0.0786349	0.106266	-2.19006	-1.15875	0.129907	0.052238	0		0	undetermined
Q5VWZ2	Lysophospholipase-like protein 1 OS=Homo sapiens OX=9606 GN=LYPLAL1 PE=1 SV=3	LYPLAL1	-0.0275274	0.0998505	-0.0963614	-2.1606	-1.143	0.0664816	0.109223	0		0	undetermined
Q9Y2X0	Mediator of RNA polymerase II transcription subunit 16 OS=Homo sapiens OX=9606 GN=MED16 PE=1 SV=2	MED16	-0.0421645	0.0835445	-0.112946	-2.15285	-1.14136	0.126227	0.0585341	0		0	undetermined
Q9NSI2	Protein FAM207A OS=Homo sapiens OX=9606 GN=FAM207A PE=1 SV=2	FAM207A	-0.0945898	-0.0850715	0.0976024	-2.14664	-1.13636	0.101994	0.0735042	0		0	undetermined
Q15036	Sorting nexin-17 OS=Homo sapiens OX=9606 GN=SNX17 PE=1 SV=1	SNX17	-0.0613083	0.0884799	-0.105853	-2.11347	-1.12097	0.104852	0.0771205	0		0	undetermined
Q9BRX5	DNA replication complex GINS protein PSF3 OS=Homo sapiens OX=9606 GN=GINS3 PE=1 SV=1	GINS3	0.020059	-0.0926545	0.0871338	-2.10942	-1.11923	0.075474	0.108132	0		0	undetermined
Q8IUF8	Ribosomal oxygenase 2 OS=Homo sapiens OX=9606 GN=RIOX2 PE=1 SV=1	RIOX2	0.00842687	0.087691	-0.105391	-2.09259	-1.11669	0.108062	0.0784801	0		0	undetermined
P56385	ATP synthase subunit e, mitochondrial OS=Homo sapiens OX=9606 GN=ATP5ME PE=1 SV=2	ATP5ME	0.0112243	0.0792102	-0.112903	-2.0832	-1.11669	0.147671	0.0586352	0		0	undetermined
Q9NP72	Ras-related protein Rab-18 OS=Homo sapiens OX=9606 GN=RAB18 PE=1 SV=1	RAB18	0.0029811	0.101905	-0.0884806	-2.07955	-1.11669	0.0609698	0.143221	0		0	undetermined
Q9H814	Phosphorylated adapter RNA export protein OS=Homo sapiens OX=9606 GN=PHAX PE=1 SV=1	PHAX	0.0718362	-0.0750002	0.103255	-2.07951	-1.11669	0.148106	0.0589569	0		0	undetermined
P67812	Signal peptidase complex catalytic subunit SEC11A OS=Homo sapiens OX=9606 GN=SEC11A PE=1 SV=1	SEC11A	-0.0423582	0.103552	-0.0862386	-2.07778	-1.11669	0.0568275	0.154244	0		0	undetermined
Q9NWU5	39S ribosomal protein L22, mitochondrial OS=Homo sapiens OX=9606 GN=MRPL22 PE=1 SV=1	MRPL22	-0.0511386	0.0723707	-0.116021	-2.03431	-1.08803	0.187019	0.0517235	0		0	undetermined
Q9GZQ8	Microtubule-associated proteins 1A/1B light chain 3B OS=Homo sapiens OX=9606 GN=MAP1LC3B PE=1 SV=3	MAP1LC3B	-0.00426927	0.0836545	-0.105538	-2.02863	-1.08696	0.125717	0.0780455	0		0	undetermined
Q14847	LIM and SH3 domain protein 1 OS=Homo sapiens OX=9606 GN=LASP1 PE=1 SV=2	LASP1	0.0731124	-0.0839047	0.0910979	-2.0204	-1.08519	0.106665	0.0937463	0		0	undetermined
Q9H7E9	UPF0488 protein C8orf33 OS=Homo sapiens OX=9606 GN=C8orf33 PE=1 SV=1	C8orf33	0.0737733	-0.098614	0.0726821	-2.00525	-1.08234	0.0588364	0.175747	0		0	undetermined
P26374	Rab proteins geranylgeranyltransferase component A 2 OS=Homo sapiens OX=9606 GN=CHML PE=1 SV=2	CHML	-0.0336101	0.104906	-0.07754	-1.98232	-1.06432	0.053603	0.203156	0		0	undetermined
P24385	G1/S-specific cyclin-D1 OS=Homo sapiens OX=9606 GN=CCND1 PE=1 SV=1	CCND1	-0.0748011	0.0949202	-0.08976	-1.97183	-1.06236	0.0813972	0.137207	0		0	undetermined
P18564	Integrin beta-6 OS=Homo sapiens OX=9606 GN=ITGB6 PE=1 SV=2	ITGB6	0.04161	0.0815337	-0.103781	-1.96566	-1.06236	0.135853	0.0833767	0		0	undetermined
P18124	60S ribosomal protein L7 OS=Homo sapiens OX=9606 GN=RPL7 PE=1 SV=1	RPL7	0.198043	-0.0958109	0.073512	-1.96499	-1.06236	0.0662381	0.171163	0		0	undetermined
P05556	Integrin beta-1 OS=Homo sapiens OX=9606 GN=ITGB1 PE=1 SV=2	ITGB1	0.0216152	0.0807561	-0.104307	-1.96197	-1.06236	0.139724	0.0817488	0		0	undetermined
P53671	LIM domain kinase 2 OS=Homo sapiens OX=9606 GN=LIMK2 PE=1 SV=1	LIMK2	-0.0403792	0.0701687	-0.113568	-1.95892	-1.06236	0.201205	0.057099	0		0	undetermined
Q8WWI5	Choline transporter-like protein 1 OS=Homo sapiens OX=9606 GN=SLC44A1 PE=1 SV=1	SLC44A1	-0.0533936	0.0662749	-0.11652	-1.95575	-1.06236	0.228184	0.050682	0		0	undetermined
Q13283	Ras GTPase-activating protein-binding protein 1 OS=Homo sapiens OX=9606 GN=G3BP1 PE=1 SV=1	G3BP1	0.0275659	-0.0888496	0.0809803	-1.94862	-1.05719	0.087977	0.133859	0		0	undetermined
O14672	Disintegrin and metalloproteinase domain-containing protein 10 OS=Homo sapiens OX=9606 GN=ADAM10 PE=1 SV=1	ADAM10	-0.0141545	0.100819	-0.0800997	-1.94063	-1.05483	0.0638339	0.187716	0		0	undetermined
Q15185	Prostaglandin E synthase 3 OS=Homo sapiens OX=9606 GN=PTGES3 PE=1 SV=1	PTGES3	-0.0596378	-0.0960929	0.0699542	-1.92094	-1.05017	0.0654604	0.191461	0		0	undetermined
P14927	Cytochrome b-c1 complex subunit 7 OS=Homo sapiens OX=9606 GN=UQCRB PE=1 SV=2	UQCRB	-0.0148759	-0.101129	0.0625512	-1.91705	-1.0489	0.0527937	0.239263	0		0	undetermined
P55081	Microfibrillar-associated protein 1 OS=Homo sapiens OX=9606 GN=MFAP1 PE=1 SV=2	MFAP1	0.0668005	-0.10129	0.0621655	-1.91518	-1.04878	0.052424	0.241966	0		0	undetermined
O75976	Carboxypeptidase D OS=Homo sapiens OX=9606 GN=CPD PE=1 SV=2	CPD	0.045192	0.075222	-0.106317	-1.90974	-1.04801	0.169764	0.0757715	0		0	undetermined
O14974	Protein phosphatase 1 regulatory subunit 12A OS=Homo sapiens OX=9606 GN=PPP1R12A PE=1 SV=1	PPP1R12A	-0.00789639	-0.0960545	0.0691528	-1.90934	-1.04801	0.0655658	0.196268	0		0	undetermined
P04114	Apolipoprotein B-100 OS=Homo sapiens OX=9606 GN=APOB PE=1 SV=2	APOB	-0.0825618	0.0948082	-0.0855415	-1.90849	-1.04801	0.0817652	0.157799	0		0	undetermined
Q13435	Splicing factor 3B subunit 2 OS=Homo sapiens OX=9606 GN=SF3B2 PE=1 SV=2	SF3B2	0.0483727	-0.0898063	0.0769383	-1.90616	-1.0475	0.084686	0.153181	0		0	undetermined
Q9H3G5	Probable serine carboxypeptidase CPVL OS=Homo sapiens OX=9606 GN=CPVL PE=1 SV=2	CPVL	-0.045344	0.0889906	-0.0918683	-1.90091	-1.04488	0.102815	0.127725	0		0	undetermined
Q9H910	Jupiter microtubule associated homolog 2 OS=Homo sapiens OX=9606 GN=JPT2 PE=1 SV=1	JPT2	0.0361207	-0.0741989	0.0930543	-1.8955	-1.04278	0.152368	0.0872353	0		0	undetermined
P11279	Lysosome-associated membrane glycoprotein 1 OS=Homo sapiens OX=9606 GN=LAMP1 PE=1 SV=3	LAMP1	0.151105	0.0766458	-0.103924	-1.89181	-1.04077	0.161609	0.082932	0		0	undetermined
P39748	Flap endonuclease 1 OS=Homo sapiens OX=9606 GN=FEN1 PE=1 SV=1	FEN1	0.181757	-0.0614027	0.103516	-1.88379	-1.03609	0.233626	0.0583471	0		0	undetermined
Q8NCW5	NAD(P)H-hydrate epimerase OS=Homo sapiens OX=9606 GN=NAXE PE=1 SV=2	NAXE	-0.00894882	0.0667398	-0.111904	-1.88117	-1.03588	0.224833	0.0610057	0		0	undetermined
Q9NX40	OCIA domain-containing protein 1 OS=Homo sapiens OX=9606 GN=OCIAD1 PE=1 SV=1	OCIAD1	-0.0274213	-0.0791752	0.087066	-1.87903	-1.03588	0.127357	0.108392	0		0	undetermined
P14174	Macrophage migration inhibitory factor OS=Homo sapiens OX=9606 GN=MIF PE=1 SV=4	MIF	-0.0686755	-0.0752304	0.0907446	-1.87437	-1.03409	0.146898	0.0949628	0		0	undetermined
Q9HAD4	WD repeat-containing protein 41 OS=Homo sapiens OX=9606 GN=WDR41 PE=1 SV=3	WDR41	0.0457191	0.0979892	-0.0785967	-1.86854	-1.03152	0.0718238	0.196674	0		0	undetermined
Q6UX04	Spliceosome-associated protein CWC27 homolog OS=Homo sapiens OX=9606 GN=CWC27 PE=1 SV=1	CWC27	-0.0589819	-0.0866819	0.0776236	-1.86197	-1.02824	0.0958161	0.149764	0		0	undetermined
P08397	Porphobilinogen deaminase OS=Homo sapiens OX=9606 GN=HMBS PE=1 SV=2	HMBS	-0.0214646	-0.0888269	0.0748346	-1.859	-1.02682	0.0880563	0.164043	0		0	undetermined
Q9H0W8	Protein SMG9 OS=Homo sapiens OX=9606 GN=SMG9 PE=1 SV=1	SMG9	0.0451308	-0.0681409	0.0959488	-1.85149	-1.0241	0.187662	0.0782767	0		0	undetermined
P52594	Arf-GAP domain and FG repeat-containing protein 1 OS=Homo sapiens OX=9606 GN=AGFG1 PE=1 SV=2	AGFG1	0.0900423	-0.059309	0.102597	-1.83907	-1.01768	0.249412	0.0605171	0		0	undetermined
A4D1E9	GTP-binding protein 10 OS=Homo sapiens OX=9606 GN=GTPBP10 PE=1 SV=1	GTPBP10	-0.0234966	0.104712	-0.0649495	-1.81823	-1.00791	0.0540544	0.292584	0		0	undetermined
Q9Y2S6	Translation machinery-associated protein 7 OS=Homo sapiens OX=9606 GN=TMA7 PE=1 SV=1	TMA7	-0.0103174	-0.065839	0.0958428	-1.81621	-1.00791	0.202548	0.078591	0		0	undetermined
P23528	Cofilin-1 OS=Homo sapiens OX=9606 GN=CFL1 PE=1 SV=3	CFL1	-0.0276364	-0.0954032	0.062907	-1.81495	-1.00791	0.0673759	0.236789	0		0	undetermined
Q641Q2	WASH complex subunit 2A OS=Homo sapiens OX=9606 GN=WASHC2A PE=1 SV=3	WASHC2A	-0.0780552	-0.0652753	0.0961761	-1.81362	-1.00791	0.206321	0.077606	0		0	undetermined
Q8NEC7	Glutathione S-transferase C-terminal domain-containing protein OS=Homo sapiens OX=9606 GN=GSTCD PE=1 SV=2	GSTCD	0.0305061	0.0683636	-0.106231	-1.80783	-1.00363	0.213408	0.0760192	0		0	undetermined
Q02818	Nucleobindin-1 OS=Homo sapiens OX=9606 GN=NUCB1 PE=1 SV=4	NUCB1	0.0721489	-0.0789429	0.0820318	-1.79847	-0.999504	0.128449	0.129155	0		0	undetermined
Q4L180	Filamin A-interacting protein 1-like OS=Homo sapiens OX=9606 GN=FILIP1L PE=1 SV=2	FILIP1L	0.0330449	-0.0744279	0.0865452	-1.79586	-0.99784	0.151141	0.110409	0		0	undetermined
Q9P032	NADH dehydrogenase [ubiquinone] 1 alpha subcomplex assembly factor 4 OS=Homo sapiens OX=9606 GN=NDUFAF4 PE=1 SV=1	NDUFAF4	-0.0565901	0.056987	-0.114408	-1.7941	-0.997365	0.30266	0.055208	0		0	undetermined
P60520	Gamma-aminobutyric acid receptor-associated protein-like 2 OS=Homo sapiens OX=9606 GN=GABARAPL2 PE=1 SV=1	GABARAPL2	-0.00722548	-0.0595108	0.0997241	-1.79256	-0.996609	0.247859	0.0677322	0		0	undetermined
P30050	60S ribosomal protein L12 OS=Homo sapiens OX=9606 GN=RPL12 PE=1 SV=1	RPL12	0.0796654	-0.0905603	0.0673592	-1.78647	-0.994151	0.082163	0.207346	0		0	undetermined
Q12874	Splicing factor 3A subunit 3 OS=Homo sapiens OX=9606 GN=SF3A3 PE=1 SV=1	SF3A3	0.132787	-0.0958762	0.0595374	-1.78087	-0.991469	0.0660574	0.260956	0		0	undetermined
Q9H9Q4	Non-homologous end-joining factor 1 OS=Homo sapiens OX=9606 GN=NHEJ1 PE=1 SV=1	NHEJ1	-0.010364	0.0578259	-0.112664	-1.7744	-0.987897	0.295336	0.0591953	0		0	undetermined
O95721	Synaptosomal-associated protein 29 OS=Homo sapiens OX=9606 GN=SNAP29 PE=1 SV=1	SNAP29	-0.121418	-0.0757725	0.0832954	-1.76711	-0.982698	0.144085	0.123674	0		0	undetermined
Q9BZL1	Ubiquitin-like protein 5 OS=Homo sapiens OX=9606 GN=UBL5 PE=1 SV=1	UBL5	-0.0242104	0.0868983	-0.0851117	-1.76704	-0.982698	0.111365	0.160022	0		0	undetermined
Q12907	Vesicular integral-membrane protein VIP36 OS=Homo sapiens OX=9606 GN=LMAN2 PE=1 SV=1	LMAN2	0.00225399	0.0898302	-0.081518	-1.76572	-0.98235	0.0995348	0.179543	0		0	undetermined
Q9H2D6	TRIO and F-actin-binding protein OS=Homo sapiens OX=9606 GN=TRIOBP PE=1 SV=3	TRIOBP	-0.09932	0.0767799	-0.0958443	-1.76525	-0.98235	0.160856	0.111238	0		0	undetermined
P11908	Ribose-phosphate pyrophosphokinase 2 OS=Homo sapiens OX=9606 GN=PRPS2 PE=1 SV=2	PRPS2	-0.0371608	0.0631083	-0.107706	-1.75953	-0.980757	0.251951	0.0718521	0		0	undetermined
Q09666	Neuroblast differentiation-associated protein AHNAK OS=Homo sapiens OX=9606 GN=AHNAK PE=1 SV=2	AHNAK	0.0134613	-0.0870488	0.0696597	-1.75645	-0.979952	0.0944511	0.193217	0		0	undetermined
Q9Y696	Chloride intracellular channel protein 4 OS=Homo sapiens OX=9606 GN=CLIC4 PE=1 SV=4	CLIC4	-0.105021	0.0775738	-0.0944052	-1.7553	-0.979504	0.156455	0.117	0		0	undetermined
Q14152	Eukaryotic translation initiation factor 3 subunit A OS=Homo sapiens OX=9606 GN=EIF3A PE=1 SV=1	EIF3A	0.0557339	-0.0883038	0.0676695	-1.75123	-0.978663	0.0899005	0.205398	0		0	undetermined
P49590	Probable histidine--tRNA ligase, mitochondrial OS=Homo sapiens OX=9606 GN=HARS2 PE=1 SV=1	HARS2	0.037022	0.100409	-0.0657514	-1.7477	-0.978663	0.0649441	0.286202	0		0	undetermined
O15085	Rho guanine nucleotide exchange factor 11 OS=Homo sapiens OX=9606 GN=ARHGEF11 PE=1 SV=1	ARHGEF11	0.0314136	0.100799	-0.0651586	-1.74769	-0.978663	0.0638873	0.290911	0		0	undetermined
O95302	Peptidyl-prolyl cis-trans isomerase FKBP9 OS=Homo sapiens OX=9606 GN=FKBP9 PE=1 SV=2	FKBP9	0.0146263	0.0878294	-0.0819335	-1.7378	-0.972453	0.107493	0.177199	0		0	undetermined
Q8N183	NADH dehydrogenase [ubiquinone] 1 alpha subcomplex assembly factor 2 OS=Homo sapiens OX=9606 GN=NDUFAF2 PE=1 SV=1	NDUFAF2	-0.0671201	-0.0967746	0.0529723	-1.71766	-0.956423	0.0636113	0.312808	0		0	undetermined
Q15833	Syntaxin-binding protein 2 OS=Homo sapiens OX=9606 GN=STXBP2 PE=1 SV=2	STXBP2	-0.010581	-0.0851316	0.0687301	-1.71124	-0.956314	0.101758	0.198839	0		0	undetermined
Q15398	Disks large-associated protein 5 OS=Homo sapiens OX=9606 GN=DLGAP5 PE=1 SV=2	DLGAP5	-0.085555	-0.0612457	0.0932969	-1.70961	-0.956314	0.234784	0.0864539	0		0	undetermined
Q17RY6	Lymphocyte antigen 6K OS=Homo sapiens OX=9606 GN=LY6K PE=1 SV=2	LY6K	0.0755305	0.047651	-0.116078	-1.70945	-0.956314	0.392254	0.0516035	0		0	undetermined
P50452	Serpin B8 OS=Homo sapiens OX=9606 GN=SERPINB8 PE=1 SV=2	SERPINB8	-0.0316235	0.0754171	-0.0934843	-1.7084	-0.955935	0.168629	0.120809	0		0	undetermined
Q9Y2Q3	Glutathione S-transferase kappa 1 OS=Homo sapiens OX=9606 GN=GSTK1 PE=1 SV=3	GSTK1	-0.0480625	0.106203	-0.0525578	-1.70535	-0.953554	0.0506556	0.403264	0		0	undetermined
Q9C0D5	Protein TANC1 OS=Homo sapiens OX=9606 GN=TANC1 PE=1 SV=3	TANC1	-0.0683801	0.0923063	-0.0737016	-1.7032	-0.952877	0.0903448	0.228011	0		0	undetermined
P12235	ADP/ATP translocase 1 OS=Homo sapiens OX=9606 GN=SLC25A4 PE=1 SV=4	SLC25A4	0.00837454	0.105231	-0.0537225	-1.69941	-0.952877	0.0528497	0.391904	0		0	undetermined
O15162	Phospholipid scramblase 1 OS=Homo sapiens OX=9606 GN=PLSCR1 PE=1 SV=1	PLSCR1	-0.0707114	0.0583419	-0.107886	-1.69937	-0.952877	0.290889	0.0713582	0		0	undetermined
Q9NZC9	SWI/SNF-related matrix-associated actin-dependent regulator of chromatin subfamily A-like protein 1 OS=Homo sapiens OX=9606 GN=SMARCAL1 PE=1 SV=1	SMARCAL1	-0.0655171	0.0931086	-0.0719833	-1.69494	-0.949396	0.0875179	0.239814	0		0	undetermined
Q9H1E3	Nuclear ubiquitous casein and cyclin-dependent kinase substrate 1 OS=Homo sapiens OX=9606 GN=NUCKS1 PE=1 SV=1	NUCKS1	0.0456723	-0.0903671	0.0604076	-1.69296	-0.949396	0.0828038	0.254557	0		0	undetermined
Q96GQ7	Probable ATP-dependent RNA helicase DDX27 OS=Homo sapiens OX=9606 GN=DDX27 PE=1 SV=2	DDX27	0.0665769	-0.0780929	0.0757018	-1.69232	-0.949396	0.132505	0.159498	0		0	undetermined
Q14746	Conserved oligomeric Golgi complex subunit 2 OS=Homo sapiens OX=9606 GN=COG2 PE=1 SV=1	COG2	0.0111077	0.0708138	-0.0964014	-1.68501	-0.946357	0.19697	0.109068	0		0	undetermined
Q9UBK9	Protein UXT OS=Homo sapiens OX=9606 GN=UXT PE=1 SV=1	UXT	0.0290179	0.0618525	-0.104076	-1.68238	-0.944369	0.261839	0.0824613	0		0	undetermined
Q8N0U8	Vitamin K epoxide reductase complex subunit 1-like protein 1 OS=Homo sapiens OX=9606 GN=VKORC1L1 PE=1 SV=2	VKORC1L1	0.0593557	0.0477113	-0.114375	-1.68008	-0.943363	0.391628	0.0552809	0		0	undetermined
Q96C01	Protein FAM136A OS=Homo sapiens OX=9606 GN=FAM136A PE=1 SV=1	FAM136A	0.0372126	-0.065147	0.0876635	-1.67484	-0.940451	0.207186	0.106114	0		0	undetermined
Q96AT9	Ribulose-phosphate 3-epimerase OS=Homo sapiens OX=9606 GN=RPE PE=1 SV=1	RPE	0.0342313	-0.0693414	0.0834396	-1.67113	-0.93933	0.180227	0.12306	0		0	undetermined
Q13409	Cytoplasmic dynein 1 intermediate chain 2 OS=Homo sapiens OX=9606 GN=DYNC1I2 PE=1 SV=3	DYNC1I2	-0.0275319	-0.0776011	0.0747016	-1.67028	-0.93933	0.134897	0.164749	0		0	undetermined
P23434	Glycine cleavage system H protein, mitochondrial OS=Homo sapiens OX=9606 GN=GCSH PE=1 SV=2	GCSH	0.0248352	-0.0949011	0.0517489	-1.66905	-0.93933	0.0687994	0.323174	0		0	undetermined
P19474	E3 ubiquitin-protein ligase TRIM21 OS=Homo sapiens OX=9606 GN=TRIM21 PE=1 SV=1	TRIM21	-0.1319	0.0676121	-0.0981923	-1.66715	-0.939004	0.218642	0.102321	0		0	undetermined
P09669	Cytochrome c oxidase subunit 6C OS=Homo sapiens OX=9606 GN=COX6C PE=1 SV=2	COX6C	-0.00724782	-0.0809037	0.0705803	-1.66616	-0.939004	0.11946	0.187766	0		0	undetermined
P31948	Stress-induced-phosphoprotein 1 OS=Homo sapiens OX=9606 GN=STIP1 PE=1 SV=1	STIP1	0.0198137	-0.0858321	0.0641306	-1.66222	-0.937168	0.0990378	0.228418	0		0	undetermined
Q13505	Metaxin-1 OS=Homo sapiens OX=9606 GN=MTX1 PE=1 SV=3	MTX1	0.0504857	-0.0530058	0.0970683	-1.66192	-0.937168	0.301377	0.0750189	0		0	undetermined
Q9NUD5	Zinc finger CCHC domain-containing protein 3 OS=Homo sapiens OX=9606 GN=ZCCHC3 PE=1 SV=2	ZCCHC3	-0.0422528	-0.0605599	0.0906201	-1.65709	-0.934326	0.239893	0.0953944	0		0	undetermined
Q14145	Kelch-like ECH-associated protein 1 OS=Homo sapiens OX=9606 GN=KEAP1 PE=1 SV=2	KEAP1	0.110102	0.0869731	-0.0768307	-1.65407	-0.932552	0.11105	0.207594	0		0	undetermined
Q9Y2U8	Inner nuclear membrane protein Man1 OS=Homo sapiens OX=9606 GN=LEMD3 PE=1 SV=2	LEMD3	0.0471849	-0.0864184	0.0626129	-1.65261	-0.931713	0.0968058	0.238833	0		0	undetermined
P51665	26S proteasome non-ATPase regulatory subunit 7 OS=Homo sapiens OX=9606 GN=PSMD7 PE=1 SV=2	PSMD7	0.00526184	-0.0833847	0.0664764	-1.65182	-0.931545	0.108801	0.212962	0		0	undetermined
Q9H2P0	Activity-dependent neuroprotector homeobox protein OS=Homo sapiens OX=9606 GN=ADNP PE=1 SV=1	ADNP	0.0435438	0.0790385	-0.0858203	-1.65085	-0.931189	0.148574	0.15637	0		0	undetermined
Q9NVI1	Fanconi anemia group I protein OS=Homo sapiens OX=9606 GN=FANCI PE=1 SV=4	FANCI	-0.0121375	0.105474	-0.04859	-1.6496	-0.930565	0.0522956	0.44342	0		0	undetermined
Q9H2C0	Gigaxonin OS=Homo sapiens OX=9606 GN=GAN PE=1 SV=1	GAN	0.0468356	0.0621501	-0.101702	-1.6478	-0.929997	0.259471	0.0900614	0		0	undetermined
O00425	Insulin-like growth factor 2 mRNA-binding protein 3 OS=Homo sapiens OX=9606 GN=IGF2BP3 PE=1 SV=2	IGF2BP3	0.100123	-0.0391883	0.105464	-1.6405	-0.926758	0.438828	0.0539612	0		0	undetermined
P63208	S-phase kinase-associated protein 1 OS=Homo sapiens OX=9606 GN=SKP1 PE=1 SV=2	SKP1	-0.049301	0.0852659	-0.0778796	-1.63999	-0.926758	0.118417	0.201056	0		0	undetermined
Q9HD15	Steroid receptor RNA activator 1 OS=Homo sapiens OX=9606 GN=SRA1 PE=1 SV=1	SRA1	0.00841733	-0.0783493	0.0716173	-1.63912	-0.926758	0.131271	0.181762	0		0	undetermined
Q92930	Ras-related protein Rab-8B OS=Homo sapiens OX=9606 GN=RAB8B PE=1 SV=2	RAB8B	0.0501643	0.0402885	-0.116546	-1.63514	-0.925888	0.473149	0.0506292	0		0	undetermined
Q9BTT4	Mediator of RNA polymerase II transcription subunit 10 OS=Homo sapiens OX=9606 GN=MED10 PE=1 SV=1	MED10	-0.0615488	0.0628207	-0.0997714	-1.62594	-0.918783	0.254192	0.0966499	0		0	undetermined
O95864	Acyl-CoA 6-desaturase OS=Homo sapiens OX=9606 GN=FADS2 PE=1 SV=1	FADS2	-0.0557225	0.0813698	-0.0808347	-1.61744	-0.914716	0.136662	0.183447	0		0	undetermined
Q7Z6J0	E3 ubiquitin-protein ligase SH3RF1 OS=Homo sapiens OX=9606 GN=SH3RF1 PE=1 SV=2	SH3RF1	0.0442703	0.0932453	-0.0654903	-1.61646	-0.914716	0.0870434	0.28827	0		0	undetermined
Q96F86	Enhancer of mRNA-decapping protein 3 OS=Homo sapiens OX=9606 GN=EDC3 PE=1 SV=1	EDC3	-0.0262349	-0.0508065	0.0956288	-1.61018	-0.911974	0.321094	0.0792286	0		0	undetermined
O00499	Myc box-dependent-interacting protein 1 OS=Homo sapiens OX=9606 GN=BIN1 PE=1 SV=1	BIN1	0.0142928	-0.0648821	0.0835286	-1.60753	-0.911974	0.208982	0.122682	0		0	undetermined
Q9NYJ1	Cytochrome c oxidase assembly factor 4 homolog, mitochondrial OS=Homo sapiens OX=9606 GN=COA4 PE=1 SV=2	COA4	0.0131922	-0.0694929	0.0788802	-1.60561	-0.911166	0.179304	0.143649	0		0	undetermined
Q86UY6	N-alpha-acetyltransferase 40 OS=Homo sapiens OX=9606 GN=NAA40 PE=1 SV=1	NAA40	0.0519246	0.0930069	-0.0644777	-1.60011	-0.907735	0.0878724	0.296384	0		0	undetermined
Q969T9	WW domain-binding protein 2 OS=Homo sapiens OX=9606 GN=WBP2 PE=1 SV=1	WBP2	-0.044452	-0.0571792	0.0898539	-1.59918	-0.907735	0.266221	0.0980852	0		0	undetermined
P54289	Voltage-dependent calcium channel subunit alpha-2/delta-1 OS=Homo sapiens OX=9606 GN=CACNA2D1 PE=1 SV=3	CACNA2D1	0.0115321	0.0797437	-0.0813107	-1.59839	-0.907735	0.14489	0.180721	0		0	undetermined
P38117	Electron transfer flavoprotein subunit beta OS=Homo sapiens OX=9606 GN=ETFB PE=1 SV=3	ETFB	0.0236589	-0.100764	0.0340377	-1.58775	-0.900378	0.053635	0.497592	0		0	undetermined
P62070	Ras-related protein R-Ras2 OS=Homo sapiens OX=9606 GN=RRAS2 PE=1 SV=1	RRAS2	-0.00452782	0.0848894	-0.0743624	-1.58723	-0.900378	0.120092	0.223585	0		0	undetermined
O60427	Acyl-CoA (8-3)-desaturase OS=Homo sapiens OX=9606 GN=FADS1 PE=1 SV=3	FADS1	0.133426	0.0863665	-0.0724397	-1.58656	-0.900278	0.113625	0.236638	0		0	undetermined
Q8N684	Cleavage and polyadenylation specificity factor subunit 7 OS=Homo sapiens OX=9606 GN=CPSF7 PE=1 SV=1	CPSF7	0.0944431	-0.0997254	0.0357511	-1.58512	-0.899988	0.0560983	0.478795	0		0	undetermined
L0R6Q1	SLC35A4 upstream open reading frame protein OS=Homo sapiens OX=9606 GN=SLC35A4 PE=3 SV=1	SLC35A4	0.0380189	0.0537209	-0.104332	-1.58178	-0.897792	0.332321	0.0816735	0		0	undetermined
Q9BZE9	Tether containing UBX domain for GLUT4 OS=Homo sapiens OX=9606 GN=ASPSCR1 PE=1 SV=1	ASPSCR1	0.0402397	-0.0321948	0.106259	-1.5795	-0.897441	0.520271	0.0522524	0		0	undetermined
Q96PK6	RNA-binding protein 14 OS=Homo sapiens OX=9606 GN=RBM14 PE=1 SV=2	RBM14	0.0432216	-0.0962839	0.0413591	-1.57887	-0.897441	0.0649378	0.420073	0		0	undetermined
Q5SW79	Centrosomal protein of 170 kDa OS=Homo sapiens OX=9606 GN=CEP170 PE=1 SV=1	CEP170	-0.0069869	-0.0801465	0.0647045	-1.5753	-0.895314	0.122871	0.224565	0		0	undetermined
P11047	Laminin subunit gamma-1 OS=Homo sapiens OX=9606 GN=LAMC1 PE=1 SV=3	LAMC1	-0.0290265	0.0952548	-0.0588325	-1.57347	-0.894585	0.0803057	0.344396	0		0	undetermined
Q9H5K3	Protein O-mannose kinase OS=Homo sapiens OX=9606 GN=POMK PE=1 SV=1	POMK	-0.0828865	-0.0608969	0.0845804	-1.56759	-0.889935	0.237373	0.118287	0		0	undetermined
P12532	Creatine kinase U-type, mitochondrial OS=Homo sapiens OX=9606 GN=CKMT1A PE=1 SV=1	CKMT1A	-0.023484	0.0980334	-0.0536256	-1.56514	-0.88957	0.0716931	0.392842	0		0	undetermined
Q8WWM7	Ataxin-2-like protein OS=Homo sapiens OX=9606 GN=ATXN2L PE=1 SV=2	ATXN2L	0.0385117	-0.0771987	0.067378	-1.56328	-0.88859	0.136879	0.207228	0		0	undetermined
Q8WUX9	Charged multivesicular body protein 7 OS=Homo sapiens OX=9606 GN=CHMP7 PE=1 SV=1	CHMP7	-0.0442494	-0.0860375	0.0559383	-1.56299	-0.88859	0.0982512	0.288596	0		0	undetermined
O14981	TATA-binding protein-associated factor 172 OS=Homo sapiens OX=9606 GN=BTAF1 PE=1 SV=2	BTAF1	-0.0848003	0.0959229	-0.0565262	-1.5593	-0.887131	0.0781614	0.365364	0		0	undetermined
Q96QR8	Transcriptional activator protein Pur-beta OS=Homo sapiens OX=9606 GN=PURB PE=1 SV=3	PURB	-0.0052014	-0.0892145	0.0506237	-1.55485	-0.885429	0.0867101	0.332903	0		0	undetermined
Q9HB07	UPF0160 protein MYG1, mitochondrial OS=Homo sapiens OX=9606 GN=C12orf10 PE=1 SV=2	C12orf10	0.116652	-0.0379279	0.101179	-1.55208	-0.884315	0.452941	0.0639945	0		0	undetermined
Q5VT25	Serine/threonine-protein kinase MRCK alpha OS=Homo sapiens OX=9606 GN=CDC42BPA PE=1 SV=1	CDC42BPA	-0.142278	0.071921	-0.0862516	-1.54955	-0.884315	0.189854	0.154178	0		0	undetermined
O15397	Importin-8 OS=Homo sapiens OX=9606 GN=IPO8 PE=1 SV=2	IPO8	-0.0909167	0.0432141	-0.109676	-1.54758	-0.883118	0.439955	0.0665815	0		0	undetermined
O00458	Interferon-related developmental regulator 1 OS=Homo sapiens OX=9606 GN=IFRD1 PE=1 SV=4	IFRD1	0.123675	0.0946714	-0.0572181	-1.54493	-0.88156	0.0822166	0.358991	0		0	undetermined
P48507	Glutamate--cysteine ligase regulatory subunit OS=Homo sapiens OX=9606 GN=GCLM PE=1 SV=1	GCLM	0.0333312	0.0968743	-0.053445	-1.54238	-0.880091	0.0751891	0.394593	0		0	undetermined
Q12846	Syntaxin-4 OS=Homo sapiens OX=9606 GN=STX4 PE=1 SV=2	STX4	-0.032961	0.0551626	-0.10073	-1.54143	-0.879684	0.319004	0.0933314	0		0	undetermined
Q9UHY7	Enolase-phosphatase E1 OS=Homo sapiens OX=9606 GN=ENOPH1 PE=1 SV=1	ENOPH1	0.201376	-0.0712711	0.0720128	-1.53457	-0.874891	0.168738	0.179511	0		0	undetermined
P20337	Ras-related protein Rab-3B OS=Homo sapiens OX=9606 GN=RAB3B PE=1 SV=2	RAB3B	-0.00910092	0.0418483	-0.109364	-1.52721	-0.871529	0.455282	0.0673929	0		0	undetermined
Q5SW96	Low density lipoprotein receptor adapter protein 1 OS=Homo sapiens OX=9606 GN=LDLRAP1 PE=1 SV=3	LDLRAP1	-0.0115979	0.1007	-0.0451209	-1.52511	-0.870407	0.0641554	0.480329	0		0	undetermined
P04179	Superoxide dismutase [Mn], mitochondrial OS=Homo sapiens OX=9606 GN=SOD2 PE=1 SV=3	SOD2	-0.0909152	0.0478348	-0.105145	-1.52436	-0.870407	0.390348	0.0792122	0		0	undetermined
Q13185	Chromobox protein homolog 3 OS=Homo sapiens OX=9606 GN=CBX3 PE=1 SV=4	CBX3	0.11779	-0.0488679	0.0917949	-1.52372	-0.870407	0.339158	0.0913832	0		0	undetermined
Q6NZI2	Caveolae-associated protein 1 OS=Homo sapiens OX=9606 GN=CAVIN1 PE=1 SV=1	CAVIN1	0.080245	-0.0966436	0.0345654	-1.51606	-0.865954	0.0639632	0.491761	0		0	undetermined
Q07960	Rho GTPase-activating protein 1 OS=Homo sapiens OX=9606 GN=ARHGAP1 PE=1 SV=1	ARHGAP1	-0.0138494	0.091015	-0.0601492	-1.51488	-0.865954	0.0950486	0.332776	0		0	undetermined
O75306	NADH dehydrogenase [ubiquinone] iron-sulfur protein 2, mitochondrial OS=Homo sapiens OX=9606 GN=NDUFS2 PE=1 SV=2	NDUFS2	-0.039555	0.0700267	-0.0856473	-1.51339	-0.86499	0.202146	0.157255	0		0	undetermined
Q8IXH7	Negative elongation factor C/D OS=Homo sapiens OX=9606 GN=NELFCD PE=1 SV=2	NELFCD	0.0213832	0.0823649	-0.071655	-1.51153	-0.864653	0.131808	0.242117	0		0	undetermined
Q9UNY4	Transcription termination factor 2 OS=Homo sapiens OX=9606 GN=TTF2 PE=1 SV=2	TTF2	-0.14055	-0.0304961	0.103029	-1.50552	-0.860265	0.541168	0.059488	0		0	undetermined
Q9NVM6	DnaJ homolog subfamily C member 17 OS=Homo sapiens OX=9606 GN=DNAJC17 PE=1 SV=1	DNAJC17	0.0925051	0.0382118	-0.110162	-1.50169	-0.857657	0.497524	0.0653302	0		0	undetermined
Q14444	Caprin-1 OS=Homo sapiens OX=9606 GN=CAPRIN1 PE=1 SV=2	CAPRIN1	0.0576126	-0.0353985	0.0996731	-1.499	-0.857657	0.482024	0.0678665	0		0	undetermined
Q8N122	Regulatory-associated protein of mTOR OS=Homo sapiens OX=9606 GN=RPTOR PE=1 SV=1	RPTOR	-0.0262647	0.0401921	-0.108472	-1.49411	-0.856313	0.474266	0.0697637	0		0	undetermined
P35790	Choline kinase alpha OS=Homo sapiens OX=9606 GN=CHKA PE=1 SV=3	CHKA	0.0504586	-0.102281	0.0206334	-1.49391	-0.856313	0.0502018	0.657105	0		0	undetermined
Q9P0K7	Ankycorbin OS=Homo sapiens OX=9606 GN=RAI14 PE=1 SV=2	RAI14	-0.106252	0.0648747	-0.08923	-1.49278	-0.856313	0.238488	0.139674	0		0	undetermined
Q5JVF3	PCI domain-containing protein 2 OS=Homo sapiens OX=9606 GN=PCID2 PE=1 SV=2	PCID2	0.0440087	-0.0542529	0.0854779	-1.49254	-0.856313	0.290562	0.114636	0		0	undetermined
P42336	Phosphatidylinositol 4,5-bisphosphate 3-kinase catalytic subunit alpha isoform OS=Homo sapiens OX=9606 GN=PIK3CA PE=1 SV=2	PIK3CA	-0.0857983	0.0473204	-0.103564	-1.49244	-0.856313	0.395697	0.0840555	0		0	undetermined
P35658	Nuclear pore complex protein Nup214 OS=Homo sapiens OX=9606 GN=NUP214 PE=1 SV=2	NUP214	0.000945909	-0.100384	0.0244789	-1.49124	-0.856306	0.0545273	0.609246	0		0	undetermined
Q9BRP1	Programmed cell death protein 2-like OS=Homo sapiens OX=9606 GN=PDCD2L PE=1 SV=1	PDCD2L	-0.0274639	0.0995613	-0.0436487	-1.48971	-0.855828	0.0672894	0.496483	0		0	undetermined
O14618	Copper chaperone for superoxide dismutase OS=Homo sapiens OX=9606 GN=CCS PE=1 SV=1	CCS	-0.0335009	0.0673409	-0.0866364	-1.48935	-0.855828	0.220554	0.152242	0		0	undetermined
Q8WZ82	Esterase OVCA2 OS=Homo sapiens OX=9606 GN=OVCA2 PE=1 SV=1	OVCA2	-0.0282758	0.0639924	-0.0897739	-1.4887	-0.855828	0.245148	0.137143	0		0	undetermined
O00244	Copper transport protein ATOX1 OS=Homo sapiens OX=9606 GN=ATOX1 PE=1 SV=1	ATOX1	0.0155561	-0.0379034	0.0974185	-1.48822	-0.855828	0.453218	0.0740229	0		0	undetermined
O15270	Serine palmitoyltransferase 2 OS=Homo sapiens OX=9606 GN=SPTLC2 PE=1 SV=1	SPTLC2	0.0262607	0.104792	-0.032409	-1.48265	-0.853077	0.0538677	0.628733	0		0	undetermined
P18206	Vinculin OS=Homo sapiens OX=9606 GN=VCL PE=1 SV=4	VCL	0.0894798	-0.0455865	0.0915015	-1.47933	-0.850968	0.371189	0.0923722	0		0	undetermined
Q92896	Golgi apparatus protein 1 OS=Homo sapiens OX=9606 GN=GLG1 PE=1 SV=2	GLG1	-0.0132699	0.0764827	-0.0761927	-1.4788	-0.850942	0.162528	0.211646	0		0	undetermined
Q7Z3B4	Nucleoporin p54 OS=Homo sapiens OX=9606 GN=NUP54 PE=1 SV=2	NUP54	0.0354594	0.0894463	-0.0587063	-1.47169	-0.847867	0.101024	0.345523	0		0	undetermined
Q10469	Alpha-1,6-mannosyl-glycoprotein 2-beta-N-acetylglucosaminyltransferase OS=Homo sapiens OX=9606 GN=MGAT2 PE=1 SV=1	MGAT2	-0.0840642	0.0303838	-0.112642	-1.46539	-0.844002	0.595084	0.0592479	0		0	undetermined
Q9UH65	Switch-associated protein 70 OS=Homo sapiens OX=9606 GN=SWAP70 PE=1 SV=1	SWAP70	0.0060792	-0.018322	0.106968	-1.4598	-0.840937	0.702033	0.0507681	0		0	undetermined
Q01650	Large neutral amino acids transporter small subunit 1 OS=Homo sapiens OX=9606 GN=SLC7A5 PE=1 SV=2	SLC7A5	0.0305052	-0.0739568	0.0632561	-1.45859	-0.840937	0.153674	0.234378	0		0	undetermined
P18065	Insulin-like growth factor-binding protein 2 OS=Homo sapiens OX=9606 GN=IGFBP2 PE=1 SV=2	IGFBP2	-0.00387868	0.094676	-0.0492166	-1.45856	-0.840937	0.0822014	0.436932	0		0	undetermined
P62753	40S ribosomal protein S6 OS=Homo sapiens OX=9606 GN=RPS6 PE=1 SV=1	RPS6	0.0363724	-0.0956256	0.0302725	-1.45597	-0.83901	0.0667533	0.540239	0		0	undetermined
O60826	Coiled-coil domain-containing protein 22 OS=Homo sapiens OX=9606 GN=CCDC22 PE=1 SV=1	CCDC22	-0.00646927	0.0626134	-0.0887463	-1.45491	-0.838925	0.255816	0.141956	0		0	undetermined
P11142	Heat shock cognate 71 kDa protein OS=Homo sapiens OX=9606 GN=HSPA8 PE=1 SV=1	HSPA8	-0.00621516	-0.0497775	0.0866552	-1.45395	-0.83845	0.330602	0.109981	0		0	undetermined
Q8IWR0	Zinc finger CCCH domain-containing protein 7A OS=Homo sapiens OX=9606 GN=ZC3H7A PE=1 SV=1	ZC3H7A	-0.0657542	-0.101186	0.0182299	-1.45291	-0.837895	0.0526608	0.687765	0		0	undetermined
Q58EX7	Puratrophin-1 OS=Homo sapiens OX=9606 GN=PLEKHG4 PE=1 SV=1	PLEKHG4	-0.0410122	0.0670561	-0.0842746	-1.45165	-0.837128	0.222574	0.164419	0		0	undetermined
Q8WU90	Zinc finger CCCH domain-containing protein 15 OS=Homo sapiens OX=9606 GN=ZC3H15 PE=1 SV=1	ZC3H15	-0.0410952	-0.0709869	0.0656881	-1.44498	-0.833575	0.170394	0.218069	0		0	undetermined
P55039	Developmentally-regulated GTP-binding protein 2 OS=Homo sapiens OX=9606 GN=DRG2 PE=1 SV=1	DRG2	-0.0199758	0.0424582	-0.103742	-1.44031	-0.830619	0.448401	0.0834991	0		0	undetermined
Q5EBL8	PDZ domain-containing protein 11 OS=Homo sapiens OX=9606 GN=PDZD11 PE=1 SV=2	PDZD11	0.020832	0.0827569	-0.0652094	-1.43782	-0.829092	0.129933	0.290505	0		0	undetermined
O95487	Protein transport protein Sec24B OS=Homo sapiens OX=9606 GN=SEC24B PE=1 SV=2	SEC24B	0.0292292	-0.068088	0.0682155	-1.43547	-0.828807	0.187995	0.202002	0		0	undetermined
P18754	Regulator of chromosome condensation OS=Homo sapiens OX=9606 GN=RCC1 PE=1 SV=1	RCC1	0.0819103	0.0602492	-0.0895428	-1.4351	-0.828807	0.274847	0.138214	0		0	undetermined
P62979	Ubiquitin-40S ribosomal protein S27a OS=Homo sapiens OX=9606 GN=RPS27A PE=1 SV=2	RPS27A	0.0333067	-0.0619617	0.0745001	-1.43443	-0.828807	0.229534	0.165822	0		0	undetermined
Q9Y2W1	Thyroid hormone receptor-associated protein 3 OS=Homo sapiens OX=9606 GN=THRAP3 PE=1 SV=2	THRAP3	0.0968914	-0.0877948	0.0418172	-1.43283	-0.828807	0.0917245	0.41547	0		0	undetermined
P24666	Low molecular weight phosphotyrosine protein phosphatase OS=Homo sapiens OX=9606 GN=ACP1 PE=1 SV=3	ACP1	0.071523	-0.0785946	0.0552681	-1.43208	-0.828807	0.130099	0.293953	0		0	undetermined
Q96ST2	Protein IWS1 homolog OS=Homo sapiens OX=9606 GN=IWS1 PE=1 SV=2	IWS1	0.0369729	-0.0862795	0.0440328	-1.43065	-0.828807	0.097331	0.393635	0		0	undetermined
Q16566	Calcium/calmodulin-dependent protein kinase type IV OS=Homo sapiens OX=9606 GN=CAMK4 PE=1 SV=1	CAMK4	-0.131796	-0.0916118	0.0350374	-1.42992	-0.828807	0.0787467	0.486578	0		0	undetermined
P20839	Inosine-5'-monophosphate dehydrogenase 1 OS=Homo sapiens OX=9606 GN=IMPDH1 PE=1 SV=2	IMPDH1	-0.0317984	0.0690002	-0.0806725	-1.42895	-0.828304	0.209045	0.184383	0		0	undetermined
Q9H0U3	Magnesium transporter protein 1 OS=Homo sapiens OX=9606 GN=MAGT1 PE=1 SV=1	MAGT1	0.00642295	0.0214912	-0.115064	-1.42641	-0.826878	0.715413	0.0537689	0		0	undetermined
P68371	Tubulin beta-4B chain OS=Homo sapiens OX=9606 GN=TUBB4B PE=1 SV=1	TUBB4B	-0.0167361	0.078883	-0.0692322	-1.42611	-0.826878	0.149396	0.259594	0		0	undetermined
P49366	Deoxyhypusine synthase OS=Homo sapiens OX=9606 GN=DHPS PE=1 SV=1	DHPS	-0.0664665	0.0989781	-0.0380079	-1.42528	-0.826517	0.0689434	0.560967	0		0	undetermined
Q9NUJ3	T-complex protein 11-like protein 1 OS=Homo sapiens OX=9606 GN=TCP11L1 PE=1 SV=1	TCP11L1	-0.00212963	0.082425	-0.06445	-1.42338	-0.826021	0.131519	0.296608	0		0	undetermined
Q9Y3D3	28S ribosomal protein S16, mitochondrial OS=Homo sapiens OX=9606 GN=MRPS16 PE=1 SV=1	MRPS16	0.0638676	0.0202886	-0.115395	-1.42192	-0.825496	0.732331	0.0530537	0		0	undetermined
P06132	Uroporphyrinogen decarboxylase OS=Homo sapiens OX=9606 GN=UROD PE=1 SV=2	UROD	0.0496325	0.0948982	-0.0449333	-1.4189	-0.824337	0.0814695	0.482371	0		0	undetermined
Q92945	Far upstream element-binding protein 2 OS=Homo sapiens OX=9606 GN=KHSRP PE=1 SV=4	KHSRP	-0.0178774	-0.0688091	0.0658714	-1.41494	-0.822231	0.183496	0.216874	0		0	undetermined
Q8IYS1	Peptidase M20 domain-containing protein 2 OS=Homo sapiens OX=9606 GN=PM20D2 PE=1 SV=2	PM20D2	-0.0783767	0.0964344	-0.0414525	-1.41206	-0.821544	0.0765517	0.521111	0		0	undetermined
Q3B726	DNA-directed RNA polymerase I subunit RPA43 OS=Homo sapiens OX=9606 GN=TWISTNB PE=1 SV=1	TWISTNB	0.029083	0.0488817	-0.0972926	-1.41069	-0.820748	0.3796	0.105668	0		0	undetermined
Q96EE3	Nucleoporin SEH1 OS=Homo sapiens OX=9606 GN=SEH1L PE=1 SV=3	SEH1L	-0.0268246	0.0854139	-0.0591121	-1.40927	-0.819791	0.117763	0.341907	0		0	undetermined
P62273	40S ribosomal protein S29 OS=Homo sapiens OX=9606 GN=RPS29 PE=1 SV=2	RPS29	0.103552	-0.0861545	0.0419574	-1.40626	-0.818806	0.0978052	0.414068	0		0	undetermined
P30046	D-dopachrome decarboxylase OS=Homo sapiens OX=9606 GN=DDT PE=1 SV=3	DDT	0.0268294	-0.0200376	0.102982	-1.40503	-0.818291	0.678307	0.0595994	0		0	undetermined
P40937	Replication factor C subunit 5 OS=Homo sapiens OX=9606 GN=RFC5 PE=1 SV=1	RFC5	-0.0350651	0.10141	-0.0303805	-1.402	-0.816173	0.0622608	0.654121	0		0	undetermined
Q9Y4C2	TRPM8 channel-associated factor 1 OS=Homo sapiens OX=9606 GN=TCAF1 PE=1 SV=3	TCAF1	0.0206265	-0.0892019	0.0362651	-1.39988	-0.815128	0.0867534	0.473233	0		0	undetermined
P19338	Nucleolin OS=Homo sapiens OX=9606 GN=NCL PE=1 SV=3	NCL	0.0807041	-0.069383	0.0640442	-1.39958	-0.815128	0.179974	0.229001	0		0	undetermined
Q8TAG9	Exocyst complex component 6 OS=Homo sapiens OX=9606 GN=EXOC6 PE=1 SV=3	EXOC6	0.0648054	-0.0135985	0.105833	-1.39953	-0.815128	0.768811	0.0531632	0		0	undetermined
O43852	Calumenin OS=Homo sapiens OX=9606 GN=CALU PE=1 SV=2	CALU	-0.0570943	-0.0428138	0.0884204	-1.39802	-0.814913	0.399668	0.103283	0		0	undetermined
Q8WXX5	DnaJ homolog subfamily C member 9 OS=Homo sapiens OX=9606 GN=DNAJC9 PE=1 SV=1	DNAJC9	0.043863	-0.0252621	0.0994032	-1.39202	-0.810724	0.608076	0.0685806	0		0	undetermined
Q9UDY2	Tight junction protein ZO-2 OS=Homo sapiens OX=9606 GN=TJP2 PE=1 SV=2	TJP2	0.0546562	-0.0475697	0.0842153	-1.38948	-0.809584	0.351612	0.119799	0		0	undetermined
Q6P1K8	General transcription factor IIH subunit 2-like protein OS=Homo sapiens OX=9606 GN=GTF2H2C PE=1 SV=1	GTF2H2C	-0.0112545	0.0752681	-0.0706832	-1.38908	-0.809584	0.169496	0.249025	0		0	undetermined
Q9Y3A3	MOB-like protein phocein OS=Homo sapiens OX=9606 GN=MOB4 PE=1 SV=1	MOB4	-0.0842155	-0.0912355	0.0312521	-1.38647	-0.807865	0.079956	0.52897	0		0	undetermined
O00629	Importin subunit alpha-3 OS=Homo sapiens OX=9606 GN=KPNA4 PE=1 SV=1	KPNA4	-0.0499291	-0.0774106	0.0526562	-1.38219	-0.805376	0.135833	0.315465	0		0	undetermined
Q6PIW4	Fidgetin-like protein 1 OS=Homo sapiens OX=9606 GN=FIGNL1 PE=1 SV=2	FIGNL1	-0.0488145	-0.0106611	0.106119	-1.38083	-0.805366	0.811257	0.0525498	0		0	undetermined
Q13144	Translation initiation factor eIF-2B subunit epsilon OS=Homo sapiens OX=9606 GN=EIF2B5 PE=1 SV=3	EIF2B5	0.00294412	-0.0748656	0.0558649	-1.38045	-0.805366	0.148815	0.28918	0		0	undetermined
P56945	Breast cancer anti-estrogen resistance protein 1 OS=Homo sapiens OX=9606 GN=BCAR1 PE=1 SV=2	BCAR1	-0.0361417	-0.100536	0.0106173	-1.3804	-0.805366	0.0541695	0.788094	0		0	undetermined
Q8IYB5	Stromal membrane-associated protein 1 OS=Homo sapiens OX=9606 GN=SMAP1 PE=1 SV=2	SMAP1	-0.0539317	0.105592	-0.0176929	-1.37989	-0.805295	0.0520265	0.821041	0		0	undetermined
P07204	Thrombomodulin OS=Homo sapiens OX=9606 GN=THBD PE=1 SV=2	THBD	-0.0250217	0.0880692	-0.0523589	-1.37848	-0.804334	0.106513	0.405224	0		0	undetermined
Q9UJA5	tRNA (adenine(58)-N(1))-methyltransferase non-catalytic subunit TRM6 OS=Homo sapiens OX=9606 GN=TRMT6 PE=1 SV=1	TRMT6	-0.0808914	0.0914605	-0.0464021	-1.37391	-0.801972	0.0934041	0.466506	0		0	undetermined
Q08257	Quinone oxidoreductase OS=Homo sapiens OX=9606 GN=CRYZ PE=1 SV=1	CRYZ	0.00631477	0.0342836	-0.10492	-1.37336	-0.801862	0.545397	0.0798887	0		0	undetermined
Q9NP92	39S ribosomal protein S30, mitochondrial OS=Homo sapiens OX=9606 GN=MRPS30 PE=1 SV=2	MRPS30	-0.0825804	0.0559892	-0.0889652	-1.37162	-0.801378	0.311529	0.14092	0		0	undetermined
Q9H2W6	39S ribosomal protein L46, mitochondrial OS=Homo sapiens OX=9606 GN=MRPL46 PE=1 SV=1	MRPL46	0.00465376	0.0811463	-0.0617228	-1.37079	-0.801378	0.137772	0.319225	0		0	undetermined
P03956	Interstitial collagenase OS=Homo sapiens OX=9606 GN=MMP1 PE=1 SV=3	MMP1	-0.0404137	0.070174	-0.0750835	-1.37073	-0.801378	0.20117	0.218825	0		0	undetermined
Q9UI14	Prenylated Rab acceptor protein 1 OS=Homo sapiens OX=9606 GN=RABAC1 PE=1 SV=1	RABAC1	-0.0668104	0.0453382	-0.0972017	-1.36825	-0.799557	0.416715	0.106011	0		0	undetermined
Q5T9L3	Protein wntless homolog OS=Homo sapiens OX=9606 GN=WLS PE=1 SV=2	WLS	-0.0506754	0.0132382	-0.115415	-1.36486	-0.797305	0.833892	0.0530093	0		0	undetermined
Q8N8S7	Protein enabled homolog OS=Homo sapiens OX=9606 GN=ENAH PE=1 SV=2	ENAH	-0.0497362	-0.0307004	0.0944794	-1.36362	-0.796942	0.538632	0.0827262	0		0	undetermined
P62917	60S ribosomal protein L8 OS=Homo sapiens OX=9606 GN=RPL8 PE=1 SV=2	RPL8	0.0140106	-0.0911952	0.0285781	-1.36063	-0.79543	0.0800863	0.560012	0		0	undetermined
P20936	Ras GTPase-activating protein 1 OS=Homo sapiens OX=9606 GN=RASA1 PE=1 SV=1	RASA1	-0.153349	0.0556717	-0.0884701	-1.36037	-0.79543	0.314387	0.143271	0		0	undetermined
O15027	Protein transport protein Sec16A OS=Homo sapiens OX=9606 GN=SEC16A PE=1 SV=4	SEC16A	0.0282596	-0.00596381	0.106969	-1.35976	-0.7953	0.880251	0.0507659	0		0	undetermined
O43809	Cleavage and polyadenylation specificity factor subunit 5 OS=Homo sapiens OX=9606 GN=NUDT21 PE=1 SV=1	NUDT21	0.142157	0.0140166	-0.114694	-1.35825	-0.7953	0.822507	0.0545755	0		0	undetermined
Q9UHL4	Dipeptidyl peptidase 2 OS=Homo sapiens OX=9606 GN=DPP7 PE=1 SV=3	DPP7	-0.00884048	0.102246	-0.0230353	-1.35749	-0.7953	0.0600923	0.749259	0		0	undetermined
A3KMH1	von Willebrand factor A domain-containing protein 8 OS=Homo sapiens OX=9606 GN=VWA8 PE=1 SV=2	VWA8	-0.00892413	0.0456725	-0.0962539	-1.35735	-0.7953	0.413126	0.10964	0		0	undetermined
Q9NQ29	Putative RNA-binding protein Luc7-like 1 OS=Homo sapiens OX=9606 GN=LUC7L PE=1 SV=1	LUC7L	0.246882	-0.0456782	0.0834173	-1.35468	-0.794055	0.370268	0.123155	0		0	undetermined
O14617	AP-3 complex subunit delta-1 OS=Homo sapiens OX=9606 GN=AP3D1 PE=1 SV=1	AP3D1	0.00900597	0.0839335	-0.0561075	-1.35139	-0.79205	0.124428	0.369254	0		0	undetermined
P16070	CD44 antigen OS=Homo sapiens OX=9606 GN=CD44 PE=1 SV=3	CD44	-0.0692472	-0.0315489	0.093135	-1.3504	-0.791915	0.528168	0.0869746	0		0	undetermined
Q14699	Raftlin OS=Homo sapiens OX=9606 GN=RFTN1 PE=1 SV=4	RFTN1	0.000134357	0.0708679	-0.0726741	-1.34946	-0.791403	0.196618	0.235018	0		0	undetermined
Q92841	Probable ATP-dependent RNA helicase DDX17 OS=Homo sapiens OX=9606 GN=DDX17 PE=1 SV=2	DDX17	0.0781986	-0.0874139	0.03415	-1.348	-0.79037	0.0931087	0.496348	0		0	undetermined
P41567	Eukaryotic translation initiation factor 1 OS=Homo sapiens OX=9606 GN=EIF1 PE=1 SV=1	EIF1	0.0174245	-0.0544982	0.0751918	-1.34395	-0.787492	0.288465	0.162159	0		0	undetermined
P51946	Cyclin-H OS=Homo sapiens OX=9606 GN=CCNH PE=1 SV=1	CCNH	-0.00556125	0.0497923	-0.0921583	-1.34294	-0.787011	0.370401	0.126462	0		0	undetermined
Q9BW71	HIRA-interacting protein 3 OS=Homo sapiens OX=9606 GN=HIRIP3 PE=1 SV=3	HIRIP3	0.0697319	-0.085107	0.0373615	-1.34083	-0.785757	0.101855	0.461488	0		0	undetermined
P61326	Protein mago nashi homolog OS=Homo sapiens OX=9606 GN=MAGOH PE=1 SV=1	MAGOH	-0.0311783	0.0862901	-0.051472	-1.33952	-0.78487	0.113952	0.414031	0		0	undetermined
Q13277	Syntaxin-3 OS=Homo sapiens OX=9606 GN=STX3 PE=1 SV=3	STX3	-0.055708	0.0348383	-0.102411	-1.33806	-0.784679	0.538501	0.087735	0		0	undetermined
Q8IWZ8	SURP and G-patch domain-containing protein 1 OS=Homo sapiens OX=9606 GN=SUGP1 PE=1 SV=2	SUGP1	-0.0899342	0.0942813	-0.0375	-1.33689	-0.784418	0.0835148	0.566966	0		0	undetermined
P30536	Translocator protein OS=Homo sapiens OX=9606 GN=TSPO PE=1 SV=3	TSPO	-0.0573571	0.0226932	-0.109219	-1.33591	-0.784418	0.698642	0.067774	0		0	undetermined
P08758	Annexin A5 OS=Homo sapiens OX=9606 GN=ANXA5 PE=1 SV=2	ANXA5	0.0139381	-0.081628	0.0423671	-1.33505	-0.784309	0.116267	0.409986	0		0	undetermined
Q16799	Reticulon-1 OS=Homo sapiens OX=9606 GN=RTN1 PE=1 SV=1	RTN1	0.0774427	-0.052585	0.0762721	-1.33474	-0.784309	0.305085	0.15656	0		0	undetermined
Q9BY42	Replication termination factor 2 OS=Homo sapiens OX=9606 GN=RTF2 PE=1 SV=3	RTF2	0.0369232	-0.0718262	0.0558978	-1.33424	-0.784239	0.165537	0.288918	0		0	undetermined
O43491	Band 4.1-like protein 2 OS=Homo sapiens OX=9606 GN=EPB41L2 PE=1 SV=1	EPB41L2	-0.000177975	-0.068925	0.0591616	-1.33084	-0.782495	0.182781	0.263753	0		0	undetermined
P50579	Methionine aminopeptidase 2 OS=Homo sapiens OX=9606 GN=METAP2 PE=1 SV=1	METAP2	0.00948689	-0.0692455	0.0585051	-1.32744	-0.780769	0.180813	0.268689	0		0	undetermined
Q32MZ4	Leucine-rich repeat flightless-interacting protein 1 OS=Homo sapiens OX=9606 GN=LRRFIP1 PE=1 SV=2	LRRFIP1	0.00340198	-0.0765842	0.0489502	-1.32638	-0.780121	0.139949	0.34772	0		0	undetermined
O00743	Serine/threonine-protein phosphatase 6 catalytic subunit OS=Homo sapiens OX=9606 GN=PPP6C PE=1 SV=1	PPP6C	-0.0530048	0.0720835	-0.0693919	-1.32555	-0.77971	0.188826	0.258416	0		0	undetermined
Q9BVS4	Serine/threonine-protein kinase RIO2 OS=Homo sapiens OX=9606 GN=RIOK2 PE=1 SV=2	RIOK2	0.074797	0.0734429	-0.0677313	-1.32497	-0.77954	0.180384	0.27085	0		0	undetermined
P00441	Superoxide dismutase [Cu-Zn] OS=Homo sapiens OX=9606 GN=SOD1 PE=1 SV=2	SOD1	0.134297	-0.0468907	0.080291	-1.32256	-0.778371	0.35824	0.137014	0		0	undetermined
Q32P41	tRNA (guanine(37)-N1)-methyltransferase OS=Homo sapiens OX=9606 GN=TRMT5 PE=1 SV=2	TRMT5	-0.0470895	0.0234448	-0.107976	-1.32158	-0.778364	0.68823	0.0711105	0		0	undetermined
Q9BZG8	2-(3-amino-3-carboxypropyl)histidine synthase subunit 1 OS=Homo sapiens OX=9606 GN=DPH1 PE=1 SV=2	DPH1	-0.021291	0.00779304	-0.11524	-1.32098	-0.778364	0.914374	0.0533873	0		0	undetermined
Q7L576	Cytoplasmic FMR1-interacting protein 1 OS=Homo sapiens OX=9606 GN=CYFIP1 PE=1 SV=1	CYFIP1	-0.0258272	0.0235605	-0.107818	-1.31995	-0.778364	0.686632	0.0715451	0		0	undetermined
Q07157	Tight junction protein ZO-1 OS=Homo sapiens OX=9606 GN=TJP1 PE=1 SV=3	TJP1	-0.0684978	-0.0569121	0.0712004	-1.31992	-0.778364	0.268382	0.184159	0		0	undetermined
P36404	ADP-ribosylation factor-like protein 2 OS=Homo sapiens OX=9606 GN=ARL2 PE=1 SV=4	ARL2	-0.0467209	0.0995914	-0.0243843	-1.31933	-0.778364	0.0672051	0.731446	0		0	undetermined
Q9UMX5	Neudesin OS=Homo sapiens OX=9606 GN=NENF PE=1 SV=1	NENF	-0.078222	-0.0667854	0.0607311	-1.31916	-0.778364	0.196327	0.252206	0		0	undetermined
Q70Z53	Protein FRA10AC1 OS=Homo sapiens OX=9606 GN=FRA10AC1 PE=1 SV=3	FRA10AC1	-0.0537403	0.0872697	-0.04788	-1.31825	-0.778364	0.109807	0.45084	0		0	undetermined
O14733	Dual specificity mitogen-activated protein kinase kinase 7 OS=Homo sapiens OX=9606 GN=MAP2K7 PE=1 SV=2	MAP2K7	-0.0393214	0.0971984	-0.0294875	-1.3179	-0.778364	0.0741978	0.665429	0		0	undetermined
Q9P260	RAB11-binding protein RELCH OS=Homo sapiens OX=9606 GN=RELCH PE=1 SV=2	RELCH	0.0211036	0.0884916	-0.045825	-1.31779	-0.778364	0.104805	0.472705	0		0	undetermined
Q9H2H9	Sodium-coupled neutral amino acid transporter 1 OS=Homo sapiens OX=9606 GN=SLC38A1 PE=1 SV=1	SLC38A1	-0.0627906	0.0453483	-0.0938998	-1.31756	-0.778364	0.416607	0.119078	0		0	undetermined
Q9BT09	Protein canopy homolog 3 OS=Homo sapiens OX=9606 GN=CNPY3 PE=1 SV=1	CNPY3	0.0207691	-0.0933751	0.0192445	-1.31721	-0.778364	0.0732777	0.674756	0		0	undetermined
Q9UKK3	Protein mono-ADP-ribosyltransferase PARP4 OS=Homo sapiens OX=9606 GN=PARP4 PE=1 SV=3	PARP4	-0.0281694	0.0753859	-0.0645962	-1.31589	-0.777867	0.16881	0.295426	0		0	undetermined
Q7Z3T8	Zinc finger FYVE domain-containing protein 16 OS=Homo sapiens OX=9606 GN=ZFYVE16 PE=1 SV=3	ZFYVE16	-0.00904281	0.0484183	-0.0913186	-1.31415	-0.776937	0.384335	0.130147	0		0	undetermined
O15355	Protein phosphatase 1G OS=Homo sapiens OX=9606 GN=PPM1G PE=1 SV=1	PPM1G	0.0811232	-0.0414191	0.0839619	-1.31334	-0.776532	0.414477	0.120856	0		0	undetermined
Q9Y223	Bifunctional UDP-N-acetylglucosamine 2-epimerase/N-acetylmannosamine kinase OS=Homo sapiens OX=9606 GN=GNE PE=1 SV=1	GNE	-0.0488152	-0.0914037	0.022571	-1.31044	-0.774447	0.0794136	0.632798	0		0	undetermined
Q9NUQ8	ATP-binding cassette sub-family F member 3 OS=Homo sapiens OX=9606 GN=ABCF3 PE=1 SV=2	ABCF3	-0.0152466	-0.0831955	0.0372078	-1.30731	-0.772127	0.109586	0.463124	0		0	undetermined
P42166	Lamina-associated polypeptide 2, isoform alpha OS=Homo sapiens OX=9606 GN=TMPO PE=1 SV=2	TMPO	0.0675284	0.0670053	-0.0735635	-1.30589	-0.771119	0.222936	0.228945	0		0	undetermined
Q5H9R7	Serine/threonine-protein phosphatase 6 regulatory subunit 3 OS=Homo sapiens OX=9606 GN=PPP6R3 PE=1 SV=2	PPP6R3	0.0398151	0.0879898	-0.0452553	-1.3037	-0.769327	0.106837	0.478868	0		0	undetermined
Q06830	Peroxiredoxin-1 OS=Homo sapiens OX=9606 GN=PRDX1 PE=1 SV=1	PRDX1	0.0319243	-0.024523	0.0943917	-1.30174	-0.768389	0.617814	0.0829979	0		0	undetermined
Q04721	Neurogenic locus notch homolog protein 2 OS=Homo sapiens OX=9606 GN=NOTCH2 PE=1 SV=3	NOTCH2	-0.0575943	0.0673973	-0.0728008	-1.30155	-0.768389	0.220156	0.234146	0		0	undetermined
Q9Y3U8	60S ribosomal protein L36 OS=Homo sapiens OX=9606 GN=RPL36 PE=1 SV=3	RPL36	-0.0740777	-0.0606958	0.0658083	-1.29854	-0.766182	0.238875	0.217285	0		0	undetermined
Q9Y6A5	Transforming acidic coiled-coil-containing protein 3 OS=Homo sapiens OX=9606 GN=TACC3 PE=1 SV=1	TACC3	0.047522	-0.0771355	0.0452854	-1.29423	-0.76308	0.137193	0.381604	0		0	undetermined
P28288	ATP-binding cassette sub-family D member 3 OS=Homo sapiens OX=9606 GN=ABCD3 PE=1 SV=1	ABCD3	0.0582594	0.0970796	-0.0266481	-1.29224	-0.761898	0.0745599	0.70188	0		0	undetermined
Q9HCN8	Stromal cell-derived factor 2-like protein 1 OS=Homo sapiens OX=9606 GN=SDF2L1 PE=1 SV=2	SDF2L1	-0.0539852	-0.0947396	0.0129575	-1.29114	-0.761355	0.0692624	0.756786	0		0	undetermined
P78395	Melanoma antigen preferentially expressed in tumors OS=Homo sapiens OX=9606 GN=PRAME PE=1 SV=1	PRAME	-0.0967657	0.0432879	-0.0936691	-1.2909	-0.761355	0.439135	0.120037	0		0	undetermined
O00233	26S proteasome non-ATPase regulatory subunit 9 OS=Homo sapiens OX=9606 GN=PSMD9 PE=1 SV=3	PSMD9	0.0360456	-0.00201008	0.1046	-1.28936	-0.760214	0.93906	0.0558717	0		0	undetermined
O14646	Chromodomain-helicase-DNA-binding protein 1 OS=Homo sapiens OX=9606 GN=CHD1 PE=1 SV=2	CHD1	0.0108335	0.0726229	-0.0657587	-1.28876	-0.760018	0.185442	0.286144	0		0	undetermined
Q9HCJ6	Synaptic vesicle membrane protein VAT-1 homolog-like OS=Homo sapiens OX=9606 GN=VAT1L PE=1 SV=2	VAT1L	-0.0307274	0.0618857	-0.0773703	-1.28592	-0.757972	0.261574	0.204212	0		0	undetermined
P41236	Protein phosphatase inhibitor 2 OS=Homo sapiens OX=9606 GN=PPP1R2 PE=1 SV=2	PPP1R2	0.0114347	-0.0816215	0.0376138	-1.28546	-0.757913	0.116295	0.458808	0		0	undetermined
Q6VN20	Ran-binding protein 10 OS=Homo sapiens OX=9606 GN=RANBP10 PE=1 SV=1	RANBP10	-0.0171338	0.101911	-0.0139552	-1.2841	-0.757486	0.0609543	0.872208	0		0	undetermined
P67936	Tropomyosin alpha-4 chain OS=Homo sapiens OX=9606 GN=TPM4 PE=1 SV=3	TPM4	0.0381556	-0.0606588	0.0647377	-1.28402	-0.757486	0.239152	0.224343	0		0	undetermined
P14649	Myosin light chain 6B OS=Homo sapiens OX=9606 GN=MYL6B PE=1 SV=1	MYL6B	-0.0612712	0.0380479	-0.0968776	-1.28351	-0.757486	0.499475	0.107241	0		0	undetermined
P06493	Cyclin-dependent kinase 1 OS=Homo sapiens OX=9606 GN=CDK1 PE=1 SV=3	CDK1	0.0121692	0.0471241	-0.0900539	-1.28031	-0.756044	0.397749	0.135854	0		0	undetermined
Q15276	Rab GTPase-binding effector protein 1 OS=Homo sapiens OX=9606 GN=RABEP1 PE=1 SV=2	RABEP1	-0.0245237	-0.0152954	0.0979365	-1.27796	-0.754931	0.744594	0.0725695	0		0	undetermined
Q93052	Lipoma-preferred partner OS=Homo sapiens OX=9606 GN=LPP PE=1 SV=1	LPP	0.0109065	-0.0962435	0.00751445	-1.27763	-0.754931	0.0650481	0.83013	0		0	undetermined
Q99523	Sortilin OS=Homo sapiens OX=9606 GN=SORT1 PE=1 SV=3	SORT1	0.0195417	0.0755297	-0.0609946	-1.27558	-0.754352	0.167977	0.32545	0		0	undetermined
Q7L5D6	Golgi to ER traffic protein 4 homolog OS=Homo sapiens OX=9606 GN=GET4 PE=1 SV=1	GET4	0.0157623	0.080397	-0.0542214	-1.27431	-0.753471	0.14154	0.387097	0		0	undetermined
Q9Y3Z3	Deoxynucleoside triphosphate triphosphohydrolase SAMHD1 OS=Homo sapiens OX=9606 GN=SAMHD1 PE=1 SV=2	SAMHD1	-0.0464913	-0.0873879	0.0261692	-1.27238	-0.75237	0.0932037	0.58871	0		0	undetermined
O75150	E3 ubiquitin-protein ligase BRE1B OS=Homo sapiens OX=9606 GN=RNF40 PE=1 SV=5	RNF40	0.0242143	-0.0571599	0.0674161	-1.27203	-0.75237	0.266376	0.206988	0		0	undetermined
Q6YHU6	Thyroid adenoma-associated protein OS=Homo sapiens OX=9606 GN=THADA PE=1 SV=1	THADA	-0.0930594	0.0433747	-0.0922468	-1.2704	-0.751134	0.438172	0.126078	0		0	undetermined
P11021	Endoplasmic reticulum chaperone BiP OS=Homo sapiens OX=9606 GN=HSPA5 PE=1 SV=2	HSPA5	0.0210214	-0.0375617	0.0839025	-1.2694	-0.750864	0.457089	0.121106	0		0	undetermined
Q13740	CD166 antigen OS=Homo sapiens OX=9606 GN=ALCAM PE=1 SV=2	ALCAM	0.0902698	-0.0251779	0.0920084	-1.26935	-0.750864	0.609182	0.0906692	0		0	undetermined
Q9HC36	rRNA methyltransferase 3, mitochondrial OS=Homo sapiens OX=9606 GN=MRM3 PE=1 SV=2	MRM3	0.0360386	-0.069567	0.0531217	-1.26726	-0.749554	0.178855	0.311558	0		0	undetermined
Q9UPU5	Ubiquitin carboxyl-terminal hydrolase 24 OS=Homo sapiens OX=9606 GN=USP24 PE=1 SV=3	USP24	-0.10545	0.07122	-0.0653455	-1.26326	-0.746714	0.194337	0.28942	0		0	undetermined
Q9GZL7	Ribosome biogenesis protein WDR12 OS=Homo sapiens OX=9606 GN=WDR12 PE=1 SV=2	WDR12	-0.0103471	0.0673093	-0.0698003	-1.2622	-0.746038	0.220777	0.25542	0		0	undetermined
P62072	Mitochondrial import inner membrane translocase subunit Tim10 OS=Homo sapiens OX=9606 GN=TIMM10 PE=1 SV=1	TIMM10	0.0797853	-0.0368172	0.0837896	-1.25959	-0.744982	0.465588	0.12158	0		0	undetermined
O95260	Arginyl-tRNA--protein transferase 1 OS=Homo sapiens OX=9606 GN=ATE1 PE=1 SV=2	ATE1	-0.0483895	0.0884575	-0.0398463	-1.25903	-0.744804	0.104943	0.539512	0		0	undetermined
Q9BZF9	Uveal autoantigen with coiled-coil domains and ankyrin repeats OS=Homo sapiens OX=9606 GN=UACA PE=1 SV=2	UACA	0.0372759	-0.0910038	0.0171896	-1.2581	-0.744653	0.0807076	0.701201	0		0	undetermined
Q6GQQ9	OTU domain-containing protein 7B OS=Homo sapiens OX=9606 GN=OTUD7B PE=1 SV=1	OTUD7B	-0.00214142	-0.0837983	0.0310082	-1.25651	-0.743827	0.1071	0.531765	0		0	undetermined
P62899	60S ribosomal protein L31 OS=Homo sapiens OX=9606 GN=RPL31 PE=1 SV=1	RPL31	0.0288019	-0.0479046	0.07477	-1.25516	-0.743451	0.348372	0.164386	0		0	undetermined
P12814	Alpha-actinin-1 OS=Homo sapiens OX=9606 GN=ACTN1 PE=1 SV=2	ACTN1	0.130383	-0.0260976	0.0904646	-1.2535	-0.742887	0.597151	0.0959357	0		0	undetermined
P15735	Phosphorylase b kinase gamma catalytic chain, liver/testis isoform OS=Homo sapiens OX=9606 GN=PHKG2 PE=1 SV=1	PHKG2	-0.00294886	0.0911578	-0.034197	-1.253	-0.742887	0.0945188	0.60671	0		0	undetermined
Q12768	WASH complex subunit 5 OS=Homo sapiens OX=9606 GN=WASHC5 PE=1 SV=1	WASHC5	-0.02343	0.0200672	-0.105576	-1.25232	-0.742887	0.73546	0.0779314	0		0	undetermined
O43148	mRNA cap guanine-N7 methyltransferase OS=Homo sapiens OX=9606 GN=RNMT PE=1 SV=1	RNMT	-0.126615	0.0790514	-0.0541134	-1.25212	-0.742887	0.148507	0.388135	0		0	undetermined
Q9NYT0	Pleckstrin-2 OS=Homo sapiens OX=9606 GN=PLEK2 PE=1 SV=1	PLEK2	-0.0120436	0.00572742	-0.112102	-1.25158	-0.742726	0.945182	0.0605308	0		0	undetermined
Q9BRF8	Serine/threonine-protein phosphatase CPPED1 OS=Homo sapiens OX=9606 GN=CPPED1 PE=1 SV=3	CPPED1	-0.0108614	0.0516848	-0.0841874	-1.24962	-0.741153	0.35173	0.164883	0		0	undetermined
Q96N66	Lysophospholipid acyltransferase 7 OS=Homo sapiens OX=9606 GN=MBOAT7 PE=1 SV=2	MBOAT7	0.0133502	0.0406356	-0.0927646	-1.24816	-0.74007	0.46914	0.123852	0		0	undetermined
P21266	Glutathione S-transferase Mu 3 OS=Homo sapiens OX=9606 GN=GSTM3 PE=1 SV=3	GSTM3	-0.0835441	0.0687971	-0.066778	-1.24581	-0.738285	0.21043	0.27817	0		0	undetermined
Q15650	Activating signal cointegrator 1 OS=Homo sapiens OX=9606 GN=TRIP4 PE=1 SV=4	TRIP4	-0.0203388	0.0336984	-0.0972506	-1.24471	-0.737765	0.55272	0.105826	0		0	undetermined
O75674	TOM1-like protein 1 OS=Homo sapiens OX=9606 GN=TOM1L1 PE=1 SV=2	TOM1L1	-0.0548928	0.0177491	-0.106234	-1.24381	-0.73724	0.768476	0.0760116	0		0	undetermined
Q8NCM8	Cytoplasmic dynein 2 heavy chain 1 OS=Homo sapiens OX=9606 GN=DYNC2H1 PE=1 SV=4	DYNC2H1	-0.0141519	0.0632382	-0.0726411	-1.24214	-0.736325	0.250943	0.235246	0		0	undetermined
P13667	Protein disulfide-isomerase A4 OS=Homo sapiens OX=9606 GN=PDIA4 PE=1 SV=2	PDIA4	0.0747833	-0.0496836	0.0721881	-1.24089	-0.735452	0.331479	0.17852	0		0	undetermined
O00299	Chloride intracellular channel protein 1 OS=Homo sapiens OX=9606 GN=CLIC1 PE=1 SV=4	CLIC1	-0.0298085	0.0702953	-0.0642929	-1.23724	-0.733116	0.200369	0.297881	0		0	undetermined
P49189	4-trimethylaminobutyraldehyde dehydrogenase OS=Homo sapiens OX=9606 GN=ALDH9A1 PE=1 SV=3	ALDH9A1	-0.00904359	0.100709	-0.0103011	-1.23704	-0.733116	0.0641293	0.922755	0		0	undetermined
O75391	Sperm-associated antigen 7 OS=Homo sapiens OX=9606 GN=SPAG7 PE=1 SV=2	SPAG7	-0.0251671	-0.0579632	0.0638962	-1.23656	-0.733015	0.259944	0.230004	0		0	undetermined
Q08209	Serine/threonine-protein phosphatase 2B catalytic subunit alpha isoform OS=Homo sapiens OX=9606 GN=PPP3CA PE=1 SV=1	PPP3CA	-0.0858984	0.0806936	-0.0500969	-1.23492	-0.732128	0.140039	0.427908	0		0	undetermined
Q96HQ2	CDKN2AIP N-terminal-like protein OS=Homo sapiens OX=9606 GN=CDKN2AIPNL PE=1 SV=1	CDKN2AIPNL	0.0338503	-0.0904037	0.0154847	-1.23379	-0.73147	0.0826819	0.72342	0		0	undetermined
Q5RKV6	Exosome complex component MTR3 OS=Homo sapiens OX=9606 GN=EXOSC6 PE=1 SV=1	EXOSC6	0.140507	-0.0727753	0.0458945	-1.2332	-0.73147	0.16017	0.375836	0		0	undetermined
P55957	BH3-interacting domain death agonist OS=Homo sapiens OX=9606 GN=BID PE=1 SV=1	BID	0.107643	-0.0263622	0.0889817	-1.23263	-0.73147	0.593711	0.101222	0		0	undetermined
Q13263	Transcription intermediary factor 1-beta OS=Homo sapiens OX=9606 GN=TRIM28 PE=1 SV=5	TRIM28	0.014989	-0.0892693	0.0177098	-1.23201	-0.73147	0.0865209	0.69447	0		0	undetermined
P57081	tRNA (guanine-N(7)-)-methyltransferase non-catalytic subunit WDR4 OS=Homo sapiens OX=9606 GN=WDR4 PE=1 SV=2	WDR4	-0.0585128	0.102182	-0.00153369	-1.23061	-0.730819	0.0602568	0.955078	0		0	undetermined
Q9Y5S2	Serine/threonine-protein kinase MRCK beta OS=Homo sapiens OX=9606 GN=CDC42BPB PE=1 SV=2	CDC42BPB	-0.0317463	-0.0739205	0.0434554	-1.22419	-0.728484	0.153871	0.399257	0		0	undetermined
P51809	Vesicle-associated membrane protein 7 OS=Homo sapiens OX=9606 GN=VAMP7 PE=1 SV=3	VAMP7	0.0761276	0.0157977	-0.105944	-1.22312	-0.727868	0.796603	0.0768541	0		0	undetermined
Q8NC60	Nitric oxide-associated protein 1 OS=Homo sapiens OX=9606 GN=NOA1 PE=1 SV=2	NOA1	-0.0250893	-0.0637912	0.0564019	-1.22284	-0.727868	0.216497	0.284929	0		0	undetermined
O43516	WAS/WASL-interacting protein family member 1 OS=Homo sapiens OX=9606 GN=WIPF1 PE=1 SV=3	WIPF1	-0.0573346	-0.0460808	0.0738888	-1.22079	-0.726926	0.366247	0.169111	0		0	undetermined
P62136	Serine/threonine-protein phosphatase PP1-alpha catalytic subunit OS=Homo sapiens OX=9606 GN=PPP1CA PE=1 SV=1	PPP1CA	0.0256831	0.100267	-0.00896318	-1.22011	-0.726618	0.0653317	0.941352	0		0	undetermined
Q7RTV0	PHD finger-like domain-containing protein 5A OS=Homo sapiens OX=9606 GN=PHF5A PE=1 SV=1	PHF5A	0.159533	-0.0217774	0.0907928	-1.21825	-0.726414	0.654569	0.0947959	0		0	undetermined
O43399	Tumor protein D54 OS=Homo sapiens OX=9606 GN=TPD52L2 PE=1 SV=2	TPD52L2	-0.0067628	-0.0404226	0.0782113	-1.2168	-0.726414	0.425254	0.14688	0		0	undetermined
Q9UL46	Proteasome activator complex subunit 2 OS=Homo sapiens OX=9606 GN=PSME2 PE=1 SV=4	PSME2	-0.0323976	0.0639855	-0.0697851	-1.21604	-0.726414	0.245201	0.255531	0		0	undetermined
Q00688	Peptidyl-prolyl cis-trans isomerase FKBP3 OS=Homo sapiens OX=9606 GN=FKBP3 PE=1 SV=1	FKBP3	-0.0572623	-0.038998	0.0792113	-1.21544	-0.726414	0.440943	0.14207	0		0	undetermined
Q9Y243	RAC-gamma serine/threonine-protein kinase OS=Homo sapiens OX=9606 GN=AKT3 PE=1 SV=1	AKT3	-0.0475028	0.0250151	-0.100617	-1.21516	-0.726414	0.666665	0.0937189	0		0	undetermined
Q96RT1	Erbin OS=Homo sapiens OX=9606 GN=ERBIN PE=1 SV=2	ERBIN	-0.0392548	0.0253047	-0.100452	-1.21515	-0.726414	0.662717	0.0942862	0		0	undetermined
O75794	Cell division cycle protein 123 homolog OS=Homo sapiens OX=9606 GN=CDC123 PE=1 SV=1	CDC123	-0.0454336	0.0792161	-0.0503461	-1.21443	-0.726085	0.14764	0.425373	0		0	undetermined
Q86VI3	Ras GTPase-activating-like protein IQGAP3 OS=Homo sapiens OX=9606 GN=IQGAP3 PE=1 SV=2	IQGAP3	0.0439925	0.101943	-0.00363514	-1.21337	-0.726085	0.060871	0.984372	0		0	undetermined
Q99436	Proteasome subunit beta type-7 OS=Homo sapiens OX=9606 GN=PSMB7 PE=1 SV=1	PSMB7	0.0304267	0.0611783	-0.0725213	-1.21299	-0.726075	0.267256	0.236073	0		0	undetermined
Q8N4V1	Membrane magnesium transporter 1 OS=Homo sapiens OX=9606 GN=MMGT1 PE=1 SV=1	MMGT1	-0.0647978	-0.0326028	0.0834525	-1.20986	-0.724272	0.515315	0.123005	0		0	undetermined
Q5T8P6	RNA-binding protein 26 OS=Homo sapiens OX=9606 GN=RBM26 PE=1 SV=3	RBM26	0.0618832	-0.0609518	0.0585543	-1.20961	-0.724272	0.236964	0.268317	0		0	undetermined
Q96T60	Bifunctional polynucleotide phosphatase/kinase OS=Homo sapiens OX=9606 GN=PNKP PE=1 SV=1	PNKP	-0.037582	0.0095568	-0.108005	-1.20938	-0.724272	0.888167	0.0710319	0		0	undetermined
P11274	Breakpoint cluster region protein OS=Homo sapiens OX=9606 GN=BCR PE=1 SV=2	BCR	-0.0937841	-0.0622529	0.0569033	-1.20737	-0.723279	0.227422	0.280999	0		0	undetermined
O95831	Apoptosis-inducing factor 1, mitochondrial OS=Homo sapiens OX=9606 GN=AIFM1 PE=1 SV=1	AIFM1	0.0231056	-0.0261667	0.0874673	-1.20709	-0.723279	0.596251	0.106858	0		0	undetermined
Q13630	GDP-L-fucose synthase OS=Homo sapiens OX=9606 GN=TSTA3 PE=1 SV=1	TSTA3	-0.0143701	0.0779564	-0.0514838	-1.20695	-0.723279	0.154366	0.413913	0		0	undetermined
Q5H8A4	GPI ethanolamine phosphate transferase 2 OS=Homo sapiens OX=9606 GN=PIGG PE=1 SV=1	PIGG	0.00732339	-0.0770114	0.0370521	-1.20559	-0.722565	0.137809	0.464786	0		0	undetermined
Q02978	Mitochondrial 2-oxoglutarate/malate carrier protein OS=Homo sapiens OX=9606 GN=SLC25A11 PE=1 SV=3	SLC25A11	-0.0306079	0.0434749	-0.0877737	-1.20551	-0.722565	0.437062	0.146629	0		0	undetermined
O95202	Mitochondrial proton/calcium exchanger protein OS=Homo sapiens OX=9606 GN=LETM1 PE=1 SV=1	LETM1	0.0335884	-0.00512273	0.0982321	-1.20273	-0.720501	0.892718	0.0717507	0		0	undetermined
P09651	Heterogeneous nuclear ribonucleoprotein A1 OS=Homo sapiens OX=9606 GN=HNRNPA1 PE=1 SV=5	HNRNPA1	0.0669704	-0.0863241	0.0199642	-1.20013	-0.71912	0.0971622	0.665586	0		0	undetermined
P82663	28S ribosomal protein S25, mitochondrial OS=Homo sapiens OX=9606 GN=MRPS25 PE=1 SV=1	MRPS25	-0.0632534	-0.0558287	0.0631857	-1.19912	-0.71912	0.277273	0.234863	0		0	undetermined
P63244	Receptor of activated protein C kinase 1 OS=Homo sapiens OX=9606 GN=RACK1 PE=1 SV=3	RACK1	0.0928111	-7.72159e-06	0.100164	-1.19903	-0.71912	0.968991	0.0665839	0		0	undetermined
P57721	Poly(rC)-binding protein 3 OS=Homo sapiens OX=9606 GN=PCBP3 PE=2 SV=2	PCBP3	-0.000936061	0.0430229	-0.0876386	-1.19854	-0.71912	0.442082	0.147288	0		0	undetermined
Q14126	Desmoglein-2 OS=Homo sapiens OX=9606 GN=DSG2 PE=1 SV=2	DSG2	-0.00896239	0.0362118	-0.0924987	-1.19751	-0.71912	0.521615	0.124991	0		0	undetermined
P52569	Cationic amino acid transporter 2 OS=Homo sapiens OX=9606 GN=SLC7A2 PE=1 SV=2	SLC7A2	-0.0319474	0.0713349	-0.0595862	-1.19723	-0.71912	0.193597	0.337713	0		0	undetermined
O60637	Tetraspanin-3 OS=Homo sapiens OX=9606 GN=TSPAN3 PE=2 SV=1	TSPAN3	-0.0140747	0.0877854	-0.0343052	-1.19707	-0.71912	0.107674	0.60539	0		0	undetermined
P40818	Ubiquitin carboxyl-terminal hydrolase 8 OS=Homo sapiens OX=9606 GN=USP8 PE=1 SV=1	USP8	-0.0463541	0.0930898	-0.0232166	-1.1946	-0.717538	0.0875833	0.746858	0		0	undetermined
P55212	Caspase-6 OS=Homo sapiens OX=9606 GN=CASP6 PE=1 SV=2	CASP6	-0.0507041	0.0137543	-0.105105	-1.19309	-0.716559	0.82634	0.0793329	0		0	undetermined
P60900	Proteasome subunit alpha type-6 OS=Homo sapiens OX=9606 GN=PSMA6 PE=1 SV=1	PSMA6	-0.157208	0.0446568	-0.0858909	-1.19164	-0.715821	0.424091	0.156009	0		0	undetermined
Q8NCG7	Sn1-specific diacylglycerol lipase beta OS=Homo sapiens OX=9606 GN=DAGLB PE=1 SV=2	DAGLB	0.0164309	0.079734	-0.0471772	-1.18977	-0.714649	0.144941	0.458252	0		0	undetermined
Q00613	Heat shock factor protein 1 OS=Homo sapiens OX=9606 GN=HSF1 PE=1 SV=1	HSF1	0.0421189	0.0479246	-0.0830593	-1.18908	-0.714316	0.38942	0.170964	0		0	undetermined
Q9NZQ3	NCK-interacting protein with SH3 domain OS=Homo sapiens OX=9606 GN=NCKIPSD PE=1 SV=1	NCKIPSD	-0.0274815	0.0652098	-0.0660298	-1.18649	-0.713404	0.235993	0.284009	0		0	undetermined
Q8IUC4	Rhophilin-2 OS=Homo sapiens OX=9606 GN=RHPN2 PE=1 SV=1	RHPN2	0.110339	0.0343084	-0.093041	-1.18631	-0.713404	0.545089	0.122676	0		0	undetermined
O75521	Enoyl-CoA delta isomerase 2, mitochondrial OS=Homo sapiens OX=9606 GN=ECI2 PE=1 SV=4	ECI2	-0.00100536	0.0700783	-0.0601747	-1.18581	-0.713404	0.201804	0.332554	0		0	undetermined
P13051	Uracil-DNA glycosylase OS=Homo sapiens OX=9606 GN=UNG PE=1 SV=2	UNG	0.053047	0.0106095	-0.1061	-1.18545	-0.713404	0.872582	0.0763998	0		0	undetermined
Q9Y282	Endoplasmic reticulum-Golgi intermediate compartment protein 3 OS=Homo sapiens OX=9606 GN=ERGIC3 PE=1 SV=1	ERGIC3	0.00857346	-0.0058252	0.096814	-1.18428	-0.712678	0.882304	0.075749	0		0	undetermined
Q9H0F6	Sharpin OS=Homo sapiens OX=9606 GN=SHARPIN PE=1 SV=1	SHARPIN	0.0399563	0.0183822	-0.102217	-1.18336	-0.712454	0.759415	0.0883659	0		0	undetermined
Q9Y617	Phosphoserine aminotransferase OS=Homo sapiens OX=9606 GN=PSAT1 PE=1 SV=2	PSAT1	-0.0467758	0.0881059	-0.0313736	-1.17679	-0.707626	0.106364	0.641639	0		0	undetermined
P08708	40S ribosomal protein S17 OS=Homo sapiens OX=9606 GN=RPS17 PE=1 SV=2	RPS17	0.0377874	-0.0668808	0.0486194	-1.17593	-0.707113	0.195707	0.350697	0		0	undetermined
Q8TF46	DIS3-like exonuclease 1 OS=Homo sapiens OX=9606 GN=DIS3L PE=1 SV=2	DIS3L	0.0211586	0.090318	-0.0264102	-1.17252	-0.7044	0.0976677	0.704967	0		0	undetermined
P15954	Cytochrome c oxidase subunit 7C, mitochondrial OS=Homo sapiens OX=9606 GN=COX7C PE=1 SV=1	COX7C	-0.0226963	0.0811577	-0.0431379	-1.17189	-0.704116	0.137714	0.502155	0		0	undetermined
Q9H0L4	Cleavage stimulation factor subunit 2 tau variant OS=Homo sapiens OX=9606 GN=CSTF2T PE=1 SV=1	CSTF2T	-0.018207	-0.0361161	0.0783345	-1.1712	-0.703771	0.473671	0.146281	0		0	undetermined
O43314	Inositol hexakisphosphate and diphosphoinositol-pentakisphosphate kinase 2 OS=Homo sapiens OX=9606 GN=PPIP5K2 PE=1 SV=3	PPIP5K2	0.0169959	-0.0280437	0.0838706	-1.17019	-0.703463	0.572058	0.121239	0		0	undetermined
Q12959	Disks large homolog 1 OS=Homo sapiens OX=9606 GN=DLG1 PE=1 SV=2	DLG1	-0.01082	0.0687941	-0.0602177	-1.16794	-0.701633	0.21045	0.332178	0		0	undetermined
O43493	Trans-Golgi network integral membrane protein 2 OS=Homo sapiens OX=9606 GN=TGOLN2 PE=1 SV=4	TGOLN2	-0.063941	-0.0631902	0.0523678	-1.16636	-0.701633	0.22072	0.317902	0		0	undetermined
Q70UQ0	Inhibitor of nuclear factor kappa-B kinase-interacting protein OS=Homo sapiens OX=9606 GN=IKBIP PE=1 SV=1	IKBIP	0.0411853	-0.0816723	0.0249896	-1.16601	-0.701633	0.116074	0.603008	0		0	undetermined
Q9H9T3	Elongator complex protein 3 OS=Homo sapiens OX=9606 GN=ELP3 PE=1 SV=2	ELP3	-0.0159945	0.0376703	-0.0893468	-1.16582	-0.701633	0.503988	0.139128	0		0	undetermined
Q7L5Y9	E3 ubiquitin-protein transferase MAEA OS=Homo sapiens OX=9606 GN=MAEA PE=1 SV=1	MAEA	0.0352199	0.0098758	-0.105219	-1.16544	-0.701633	0.883439	0.0789921	0		0	undetermined
Q9UJ83	2-hydroxyacyl-CoA lyase 1 OS=Homo sapiens OX=9606 GN=HACL1 PE=1 SV=2	HACL1	-0.0423749	0.0924262	-0.0209023	-1.16526	-0.701633	0.0899179	0.777697	0		0	undetermined
Q7Z4S6	Kinesin-like protein KIF21A OS=Homo sapiens OX=9606 GN=KIF21A PE=1 SV=2	KIF21A	0.0392128	-0.0819687	0.0243157	-1.16489	-0.701633	0.114788	0.611245	0		0	undetermined
P84101	Small EDRK-rich factor 2 OS=Homo sapiens OX=9606 GN=SERF2 PE=1 SV=1	SERF2	0.0471979	-0.0569941	0.059235	-1.16457	-0.701633	0.267718	0.263205	0		0	undetermined
Q9NYL9	Tropomodulin-3 OS=Homo sapiens OX=9606 GN=TMOD3 PE=1 SV=1	TMOD3	-0.0441868	-0.0348092	0.078753	-1.16333	-0.700841	0.488942	0.144259	0		0	undetermined
Q6IAA8	Ragulator complex protein LAMTOR1 OS=Homo sapiens OX=9606 GN=LAMTOR1 PE=1 SV=2	LAMTOR1	-0.0676715	0.0807593	-0.0428802	-1.1631	-0.700841	0.139708	0.50503	0		0	undetermined
O95965	Integrin beta-like protein 1 OS=Homo sapiens OX=9606 GN=ITGBL1 PE=2 SV=1	ITGBL1	-0.037517	-0.0254158	0.0849548	-1.16124	-0.700235	0.60606	0.116753	0		0	undetermined
Q9BTY7	Protein HGH1 homolog OS=Homo sapiens OX=9606 GN=HGH1 PE=1 SV=1	HGH1	0.0172543	-0.0458227	0.0697746	-1.16097	-0.700235	0.368822	0.192531	0		0	undetermined
P08240	Signal recognition particle receptor subunit alpha OS=Homo sapiens OX=9606 GN=SRPRA PE=1 SV=2	SRPRA	0.0180906	-0.00271279	0.0967527	-1.16066	-0.700235	0.928574	0.0759258	0		0	undetermined
P07919	Cytochrome b-c1 complex subunit 6, mitochondrial OS=Homo sapiens OX=9606 GN=UQCRH PE=1 SV=2	UQCRH	0.0569477	0.00908143	-0.105261	-1.16028	-0.700235	0.89522	0.0788656	0		0	undetermined
Q9P289	Serine/threonine-protein kinase 26 OS=Homo sapiens OX=9606 GN=STK26 PE=1 SV=2	STK26	-0.0691654	0.0976152	-0.00698975	-1.15937	-0.700235	0.0729387	0.968838	0		0	undetermined
Q04726	Transducin-like enhancer protein 3 OS=Homo sapiens OX=9606 GN=TLE3 PE=1 SV=2	TLE3	0.0168365	0.0748583	-0.0513904	-1.15892	-0.700235	0.171897	0.414847	0		0	undetermined
P18084	Integrin beta-5 OS=Homo sapiens OX=9606 GN=ITGB5 PE=1 SV=1	ITGB5	-0.0833936	0.0918519	-0.0210325	-1.15637	-0.6985	0.0919781	0.775953	0		0	undetermined
Q7L523	Ras-related GTP-binding protein A OS=Homo sapiens OX=9606 GN=RRAGA PE=1 SV=1	RRAGA	-0.108256	0.0282246	-0.0947349	-1.15288	-0.695733	0.623453	0.11566	0		0	undetermined
O60488	Long-chain-fatty-acid--CoA ligase 4 OS=Homo sapiens OX=9606 GN=ACSL4 PE=1 SV=2	ACSL4	-0.0391716	0.0708401	-0.0562263	-1.15218	-0.695576	0.196799	0.368148	0		0	undetermined
Q02241	Kinesin-like protein KIF23 OS=Homo sapiens OX=9606 GN=KIF23 PE=1 SV=3	KIF23	0.0237764	-0.0822931	0.0221958	-1.15172	-0.695576	0.113394	0.637474	0		0	undetermined
P48509	CD151 antigen OS=Homo sapiens OX=9606 GN=CD151 PE=1 SV=3	CD151	-0.0393753	0.00128068	-0.108352	-1.15068	-0.695103	0.988276	0.0700874	0		0	undetermined
O60716	Catenin delta-1 OS=Homo sapiens OX=9606 GN=CTNND1 PE=1 SV=1	CTNND1	-0.00799892	-0.0613714	0.0530949	-1.14957	-0.694447	0.233856	0.311782	0		0	undetermined
Q8IY95	Transmembrane protein 192 OS=Homo sapiens OX=9606 GN=TMEM192 PE=1 SV=1	TMEM192	-0.00671066	0.0871946	-0.0297986	-1.14822	-0.693768	0.110121	0.661481	0		0	undetermined
Q7Z5L9	Interferon regulatory factor 2-binding protein 2 OS=Homo sapiens OX=9606 GN=IRF2BP2 PE=1 SV=2	IRF2BP2	0.00179339	-0.0824606	0.0213649	-1.14734	-0.693467	0.11268	0.647884	0		0	undetermined
Q9NXF1	Testis-expressed protein 10 OS=Homo sapiens OX=9606 GN=TEX10 PE=1 SV=2	TEX10	0.0150475	0.0226386	-0.0976341	-1.14698	-0.693467	0.6994	0.104387	0		0	undetermined
O14965	Aurora kinase A OS=Homo sapiens OX=9606 GN=AURKA PE=1 SV=2	AURKA	-0.0650217	0.0890831	-0.0258231	-1.14691	-0.693467	0.10245	0.712606	0		0	undetermined
Q8IYD1	Eukaryotic peptide chain release factor GTP-binding subunit ERF3B OS=Homo sapiens OX=9606 GN=GSPT2 PE=1 SV=2	GSPT2	0.0521532	0.0886464	-0.0264956	-1.14503	-0.692591	0.104185	0.703858	0		0	undetermined
Q5VVQ6	Ubiquitin thioesterase OTU1 OS=Homo sapiens OX=9606 GN=YOD1 PE=1 SV=1	YOD1	0.00115761	0.086714	-0.0303078	-1.14458	-0.692483	0.112144	0.655039	0		0	undetermined
Q6IN85	Serine/threonine-protein phosphatase 4 regulatory subunit 3A OS=Homo sapiens OX=9606 GN=PPP4R3A PE=1 SV=1	PPP4R3A	-0.0896402	0.0195806	-0.0991046	-1.14376	-0.692066	0.742352	0.099013	0		0	undetermined
Q8N3R9	MAGUK p55 subfamily member 5 OS=Homo sapiens OX=9606 GN=MPP5 PE=1 SV=3	MPP5	0.0299923	0.0521724	-0.075956	-1.14316	-0.692066	0.347017	0.213163	0		0	undetermined
P49821	NADH dehydrogenase [ubiquinone] flavoprotein 1, mitochondrial OS=Homo sapiens OX=9606 GN=NDUFV1 PE=1 SV=4	NDUFV1	0.0436029	-0.0247371	0.0841194	-1.1421	-0.691623	0.614986	0.120198	0		0	undetermined
Q9UHN6	Cell surface hyaluronidase OS=Homo sapiens OX=9606 GN=CEMIP2 PE=1 SV=1	CEMIP2	-0.0736816	-0.0602139	0.053805	-1.14205	-0.691623	0.2425	0.30588	0		0	undetermined
P49917	DNA ligase 4 OS=Homo sapiens OX=9606 GN=LIG4 PE=1 SV=2	LIG4	0.0276797	0.0684325	-0.0583418	-1.1414	-0.69156	0.212932	0.348791	0		0	undetermined
P56282	DNA polymerase epsilon subunit 2 OS=Homo sapiens OX=9606 GN=POLE2 PE=1 SV=2	POLE2	-0.120704	0.032874	-0.0909851	-1.14121	-0.69156	0.563117	0.131633	0		0	undetermined
O15318	DNA-directed RNA polymerase III subunit RPC7 OS=Homo sapiens OX=9606 GN=POLR3G PE=1 SV=2	POLR3G	0.0462041	-0.0394691	0.0736045	-1.14052	-0.691423	0.435718	0.170658	0		0	undetermined
O14925	Mitochondrial import inner membrane translocase subunit Tim23 OS=Homo sapiens OX=9606 GN=TIMM23 PE=1 SV=1	TIMM23	-0.0107702	0.0606364	-0.0672833	-1.14011	-0.691343	0.271666	0.274273	0		0	undetermined
P23497	Nuclear autoantigen Sp-100 OS=Homo sapiens OX=9606 GN=SP100 PE=1 SV=3	SP100	0.00869987	-0.055213	0.0591159	-1.13967	-0.691239	0.282416	0.264094	0		0	undetermined
Q6F5E8	Capping protein, Arp2/3 and myosin-I linker protein 2 OS=Homo sapiens OX=9606 GN=CARMIL2 PE=1 SV=2	CARMIL2	-0.0382785	-0.0790469	0.0267146	-1.13894	-0.691163	0.127959	0.582153	0		0	undetermined
P24386	Rab proteins geranylgeranyltransferase component A 1 OS=Homo sapiens OX=9606 GN=CHM PE=1 SV=3	CHM	-0.0623324	0.0716138	-0.0539551	-1.13849	-0.691046	0.191809	0.389659	0		0	undetermined
Q86WR7	Proline and serine-rich protein 2 OS=Homo sapiens OX=9606 GN=PROSER2 PE=1 SV=2	PROSER2	0.0494849	-0.0659767	0.0463409	-1.13741	-0.690898	0.201634	0.371643	0		0	undetermined
Q969S3	Zinc finger protein 622 OS=Homo sapiens OX=9606 GN=ZNF622 PE=1 SV=1	ZNF622	0.0301342	-0.0403537	0.0726657	-1.13735	-0.690898	0.426006	0.175839	0		0	undetermined
O95817	BAG family molecular chaperone regulator 3 OS=Homo sapiens OX=9606 GN=BAG3 PE=1 SV=3	BAG3	-0.0376496	-0.0569362	0.0569812	-1.13609	-0.690109	0.268187	0.280391	0		0	undetermined
Q8NBN3	Transmembrane protein 87A OS=Homo sapiens OX=9606 GN=TMEM87A PE=1 SV=3	TMEM87A	0.0814799	-0.0906164	0.00167012	-1.1359	-0.690109	0.081978	0.910547	0		0	undetermined
Q9H0A8	COMM domain-containing protein 4 OS=Homo sapiens OX=9606 GN=COMMD4 PE=1 SV=1	COMMD4	-0.0551572	0.00522964	-0.105325	-1.13385	-0.689442	0.952621	0.078675	0		0	undetermined
A6NHR9	Structural maintenance of chromosomes flexible hinge domain-containing protein 1 OS=Homo sapiens OX=9606 GN=SMCHD1 PE=1 SV=2	SMCHD1	-0.0264971	0.0393257	-0.0859191	-1.13364	-0.689442	0.484367	0.155866	0		0	undetermined
Q9NZ63	Telomere length and silencing protein 1 homolog OS=Homo sapiens OX=9606 GN=C9orf78 PE=1 SV=1	C9orf78	-0.0154766	-0.0768122	0.0299853	-1.13359	-0.689442	0.138804	0.543567	0		0	undetermined
O95299	NADH dehydrogenase [ubiquinone] 1 alpha subcomplex subunit 10, mitochondrial OS=Homo sapiens OX=9606 GN=NDUFA10 PE=1 SV=1	NDUFA10	-0.0106052	-0.0810751	0.0223153	-1.1328	-0.689418	0.118698	0.635983	0		0	undetermined
Q8NE71	ATP-binding cassette sub-family F member 1 OS=Homo sapiens OX=9606 GN=ABCF1 PE=1 SV=2	ABCF1	0.0365958	-0.0637971	0.048449	-1.12991	-0.687401	0.216456	0.352237	0		0	undetermined
O94804	Serine/threonine-protein kinase 10 OS=Homo sapiens OX=9606 GN=STK10 PE=1 SV=1	STK10	-0.0827499	-0.0330351	0.0776895	-1.12929	-0.687114	0.51009	0.149439	0		0	undetermined
Q6P587	Acylpyruvase FAHD1, mitochondrial OS=Homo sapiens OX=9606 GN=FAHD1 PE=1 SV=2	FAHD1	-0.163721	-0.0091467	0.0918115	-1.12795	-0.686424	0.833368	0.0913278	0		0	undetermined
Q08752	Peptidyl-prolyl cis-trans isomerase D OS=Homo sapiens OX=9606 GN=PPID PE=1 SV=3	PPID	0.0148652	-0.0253828	0.0825181	-1.12411	-0.684096	0.606492	0.127024	0		0	undetermined
Q96DV4	39S ribosomal protein L38, mitochondrial OS=Homo sapiens OX=9606 GN=MRPL38 PE=1 SV=2	MRPL38	-0.0308272	0.0738285	-0.0492728	-1.12136	-0.682121	0.178042	0.436352	0		0	undetermined
Q8NEZ5	F-box only protein 22 OS=Homo sapiens OX=9606 GN=FBXO22 PE=1 SV=1	FBXO22	0.0250046	0.0969717	-0.00415771	-1.12055	-0.682121	0.0748901	0.991661	0		0	undetermined
Q9BYD1	39S ribosomal protein L13, mitochondrial OS=Homo sapiens OX=9606 GN=MRPL13 PE=1 SV=1	MRPL13	-0.0279453	0.0436942	-0.0815649	-1.12007	-0.682121	0.434639	0.179277	0		0	undetermined
P17152	Transmembrane protein 11, mitochondrial OS=Homo sapiens OX=9606 GN=TMEM11 PE=1 SV=1	TMEM11	-0.103065	0.0528073	-0.073548	-1.11945	-0.68206	0.340942	0.22905	0		0	undetermined
O15091	Mitochondrial ribonuclease P catalytic subunit OS=Homo sapiens OX=9606 GN=PRORP PE=1 SV=2	PRORP	0.00457851	0.0032862	-0.105248	-1.11926	-0.68206	0.981695	0.0789064	0		0	undetermined
P14314	Glucosidase 2 subunit beta OS=Homo sapiens OX=9606 GN=PRKCSH PE=1 SV=2	PRKCSH	0.0177422	-0.0154738	0.0878801	-1.11708	-0.680738	0.742061	0.105298	0		0	undetermined
P23246	Splicing factor, proline- and glutamine-rich OS=Homo sapiens OX=9606 GN=SFPQ PE=1 SV=2	SFPQ	0.0816552	-0.080549	0.0210311	-1.11322	-0.678501	0.121048	0.652085	0		0	undetermined
Q7L3T8	Probable proline--tRNA ligase, mitochondrial OS=Homo sapiens OX=9606 GN=PARS2 PE=1 SV=1	PARS2	0.0515425	0.0484364	-0.0767096	-1.10853	-0.675637	0.38415	0.208359	0		0	undetermined
Q7Z4H8	Protein O-glucosyltransferase 3 OS=Homo sapiens OX=9606 GN=POGLUT3 PE=1 SV=2	POGLUT3	0.00354428	0.079473	-0.0391556	-1.10743	-0.675637	0.146296	0.547525	0		0	undetermined
P85037	Forkhead box protein K1 OS=Homo sapiens OX=9606 GN=FOXK1 PE=1 SV=1	FOXK1	-0.0542544	0.0609092	-0.0642702	-1.10726	-0.675637	0.26944	0.298065	0		0	undetermined
P08754	Guanine nucleotide-binding protein G(i) subunit alpha OS=Homo sapiens OX=9606 GN=GNAI3 PE=1 SV=3	GNAI3	-0.0102744	-0.0278314	0.0796507	-1.10529	-0.675637	0.574771	0.139995	0		0	undetermined
O60502	Protein O-GlcNAcase OS=Homo sapiens OX=9606 GN=OGA PE=1 SV=2	OGA	0.00523714	-0.0396526	0.0708885	-1.105	-0.675637	0.433693	0.185967	0		0	undetermined
Q9NTM9	Copper homeostasis protein cutC homolog OS=Homo sapiens OX=9606 GN=CUTC PE=1 SV=1	CUTC	0.0280627	0.059612	-0.0654954	-1.10491	-0.675637	0.280138	0.288229	0		0	undetermined
Q8IXM3	39S ribosomal protein L41, mitochondrial OS=Homo sapiens OX=9606 GN=MRPL41 PE=1 SV=1	MRPL41	-0.0959186	0.0644395	-0.0600106	-1.10485	-0.675637	0.241757	0.333986	0		0	undetermined
P51114	Fragile X mental retardation syndrome-related protein 1 OS=Homo sapiens OX=9606 GN=FXR1 PE=1 SV=3	FXR1	0.104383	-0.0364743	0.0733929	-1.10473	-0.675637	0.469532	0.171815	0		0	undetermined
Q8NFV4	Protein ABHD11 OS=Homo sapiens OX=9606 GN=ABHD11 PE=1 SV=1	ABHD11	-0.0546136	-0.0214588	0.0836274	-1.10429	-0.675637	0.65889	0.122264	0		0	undetermined
Q9NVN8	Guanine nucleotide-binding protein-like 3-like protein OS=Homo sapiens OX=9606 GN=GNL3L PE=1 SV=1	GNL3L	0.0342209	0.0624842	-0.0620967	-1.10256	-0.674534	0.256832	0.316059	0		0	undetermined
Q16891	MICOS complex subunit MIC60 OS=Homo sapiens OX=9606 GN=IMMT PE=1 SV=1	IMMT	0.0310791	-0.0506685	0.0607405	-1.10198	-0.674276	0.322359	0.252138	0		0	undetermined
O43592	Exportin-T OS=Homo sapiens OX=9606 GN=XPOT PE=1 SV=2	XPOT	-0.124199	0.0540425	-0.0708423	-1.10006	-0.672675	0.329319	0.247885	0		0	undetermined
Q52LW3	Rho GTPase-activating protein 29 OS=Homo sapiens OX=9606 GN=ARHGAP29 PE=1 SV=2	ARHGAP29	-0.0336275	0.0423608	-0.0810831	-1.09866	-0.671905	0.449496	0.182021	0		0	undetermined
O43395	U4/U6 small nuclear ribonucleoprotein Prp3 OS=Homo sapiens OX=9606 GN=PRPF3 PE=1 SV=2	PRPF3	0.0109743	-0.0598207	0.0504672	-1.09777	-0.671648	0.245487	0.334271	0		0	undetermined
Q0JRZ9	F-BAR domain only protein 2 OS=Homo sapiens OX=9606 GN=FCHO2 PE=1 SV=2	FCHO2	-0.000896939	0.0627653	-0.0611693	-1.09552	-0.670643	0.254625	0.32395	0		0	undetermined
P62249	40S ribosomal protein S16 OS=Homo sapiens OX=9606 GN=RPS16 PE=1 SV=2	RPS16	0.0115125	-0.0819472	0.0158809	-1.09346	-0.669177	0.114881	0.718235	0		0	undetermined
Q06787	Synaptic functional regulator FMR1 OS=Homo sapiens OX=9606 GN=FMR1 PE=1 SV=1	FMR1	0.0794271	-0.0876098	0.00297218	-1.09259	-0.669177	0.0923948	0.892521	0		0	undetermined
P51692	Signal transducer and activator of transcription 5B OS=Homo sapiens OX=9606 GN=STAT5B PE=1 SV=2	STAT5B	-0.0544331	0.00074111	-0.104598	-1.09231	-0.669177	0.980199	0.0808613	0		0	undetermined
Q53EZ4	Centrosomal protein of 55 kDa OS=Homo sapiens OX=9606 GN=CEP55 PE=1 SV=3	CEP55	-0.0655	0.0644527	-0.0588413	-1.09167	-0.669	0.241658	0.344317	0		0	undetermined
Q9H4A3	Serine/threonine-protein kinase WNK1 OS=Homo sapiens OX=9606 GN=WNK1 PE=1 SV=2	WNK1	-0.00171529	-0.0648697	0.0431718	-1.08707	-0.666272	0.209067	0.402036	0		0	undetermined
Q06203	Amidophosphoribosyltransferase OS=Homo sapiens OX=9606 GN=PPAT PE=1 SV=1	PPAT	-0.0414488	0.0900003	-0.0157878	-1.08611	-0.665921	0.0988805	0.84704	0		0	undetermined
Q96EN8	Molybdenum cofactor sulfurase OS=Homo sapiens OX=9606 GN=MOCOS PE=1 SV=2	MOCOS	-0.0162349	0.0862025	-0.0242038	-1.0861	-0.665921	0.114329	0.733821	0		0	undetermined
Q8TF42	Ubiquitin-associated and SH3 domain-containing protein B OS=Homo sapiens OX=9606 GN=UBASH3B PE=1 SV=2	UBASH3B	0.0001327	0.0798511	-0.0360606	-1.08485	-0.665672	0.144336	0.584132	0		0	undetermined
Q14997	Proteasome activator complex subunit 4 OS=Homo sapiens OX=9606 GN=PSME4 PE=1 SV=2	PSME4	0.0075446	0.0221099	-0.0938725	-1.08449	-0.665672	0.706762	0.119191	0		0	undetermined
P50748	Kinetochore-associated protein 1 OS=Homo sapiens OX=9606 GN=KNTC1 PE=1 SV=1	KNTC1	-0.0579618	0.0206712	-0.0946754	-1.0843	-0.665672	0.726934	0.115901	0		0	undetermined
P09104	Gamma-enolase OS=Homo sapiens OX=9606 GN=ENO2 PE=1 SV=3	ENO2	-0.0804638	0.0135708	-0.0979576	-1.07702	-0.661594	0.829024	0.103185	0		0	undetermined
Q96RF0	Sorting nexin-18 OS=Homo sapiens OX=9606 GN=SNX18 PE=1 SV=2	SNX18	-0.00350647	-0.0551691	0.0539601	-1.07658	-0.661594	0.282784	0.3046	0		0	undetermined
P46736	Lys-63-specific deubiquitinase BRCC36 OS=Homo sapiens OX=9606 GN=BRCC3 PE=1 SV=2	BRCC3	0.000652433	-0.0850728	0.00678962	-1.07628	-0.661594	0.101989	0.840025	0		0	undetermined
Q5T6V5	Queuosine salvage protein OS=Homo sapiens OX=9606 GN=C9orf64 PE=1 SV=1	C9orf64	0.0924646	0.0842611	-0.0268734	-1.07591	-0.661594	0.122928	0.698961	0		0	undetermined
Q9NR28	Diablo homolog, mitochondrial OS=Homo sapiens OX=9606 GN=DIABLO PE=1 SV=1	DIABLO	0.0184887	0.0438085	-0.0781664	-1.07505	-0.661047	0.433377	0.199296	0		0	undetermined
Q9P265	Disco-interacting protein 2 homolog B OS=Homo sapiens OX=9606 GN=DIP2B PE=1 SV=3	DIP2B	-0.0256872	0.083195	-0.0288096	-1.07471	-0.661015	0.127862	0.674064	0		0	undetermined
Q9UBP0	Spastin OS=Homo sapiens OX=9606 GN=SPAST PE=1 SV=1	SPAST	0.0226313	0.00345328	-0.102288	-1.07218	-0.6594	0.979194	0.088136	0		0	undetermined
Q14155	Rho guanine nucleotide exchange factor 7 OS=Homo sapiens OX=9606 GN=ARHGEF7 PE=1 SV=2	ARHGEF7	0.00477035	0.049048	-0.0733476	-1.0717	-0.659227	0.377909	0.230409	0		0	undetermined
Q5W0V3	Protein FAM160B1 OS=Homo sapiens OX=9606 GN=FAM160B1 PE=1 SV=1	FAM160B1	-0.0760572	0.0909889	-0.0110375	-1.07	-0.657826	0.0951455	0.912537	0		0	undetermined
Q14691	DNA replication complex GINS protein PSF1 OS=Homo sapiens OX=9606 GN=GINS1 PE=1 SV=1	GINS1	-0.0316619	0.086487	-0.0211971	-1.06741	-0.655688	0.113109	0.773749	0		0	undetermined
P62750	60S ribosomal protein L23a OS=Homo sapiens OX=9606 GN=RPL23A PE=1 SV=1	RPL23A	-0.0319848	-0.0250568	0.0788744	-1.06722	-0.655688	0.610775	0.143677	0		0	undetermined
Q13033	Striatin-3 OS=Homo sapiens OX=9606 GN=STRN3 PE=1 SV=3	STRN3	-0.0335897	0.0556731	-0.0665317	-1.06694	-0.655688	0.314374	0.280082	0		0	undetermined
Q7Z7H8	39S ribosomal protein L10, mitochondrial OS=Homo sapiens OX=9606 GN=MRPL10 PE=1 SV=3	MRPL10	-0.00385304	0.0643791	-0.0564519	-1.06382	-0.654833	0.242213	0.366052	0		0	undetermined
Q9HAV4	Exportin-5 OS=Homo sapiens OX=9606 GN=XPO5 PE=1 SV=1	XPO5	-0.0485236	0.0139189	-0.0969305	-1.06374	-0.654833	0.823934	0.107039	0		0	undetermined
Q96C90	Protein phosphatase 1 regulatory subunit 14B OS=Homo sapiens OX=9606 GN=PPP1R14B PE=1 SV=3	PPP1R14B	0.0333998	-0.0424675	0.0653919	-1.06336	-0.654833	0.403316	0.220011	0		0	undetermined
Q99961	Endophilin-A2 OS=Homo sapiens OX=9606 GN=SH3GL1 PE=1 SV=1	SH3GL1	-0.0130711	-0.0436901	0.0642435	-1.06255	-0.654329	0.390529	0.227656	0		0	undetermined
Q8IZ83	Aldehyde dehydrogenase family 16 member A1 OS=Homo sapiens OX=9606 GN=ALDH16A1 PE=1 SV=2	ALDH16A1	-0.000236302	-0.0197912	0.0816664	-1.05992	-0.652279	0.681696	0.130775	0		0	undetermined
Q709C8	Vacuolar protein sorting-associated protein 13C OS=Homo sapiens OX=9606 GN=VPS13C PE=1 SV=1	VPS13C	-0.0110851	0.0834155	-0.02637	-1.05818	-0.651164	0.126829	0.705489	0		0	undetermined
Q9BPX3	Condensin complex subunit 3 OS=Homo sapiens OX=9606 GN=NCAPG PE=1 SV=1	NCAPG	-0.0267219	0.0733601	-0.0436398	-1.05762	-0.650904	0.18089	0.496582	0		0	undetermined
Q9UN86	Ras GTPase-activating protein-binding protein 2 OS=Homo sapiens OX=9606 GN=G3BP2 PE=1 SV=2	G3BP2	0.0642233	-0.0750194	0.0246196	-1.0566	-0.650255	0.148005	0.607524	0		0	undetermined
Q53H82	Endoribonuclease LACTB2 OS=Homo sapiens OX=9606 GN=LACTB2 PE=1 SV=2	LACTB2	-0.0596213	0.0246854	-0.0904472	-1.05595	-0.650255	0.671171	0.134059	0		0	undetermined
Q13423	NAD(P) transhydrogenase, mitochondrial OS=Homo sapiens OX=9606 GN=NNT PE=1 SV=3	NNT	-0.00155766	-0.0286391	0.0755884	-1.05466	-0.649743	0.564481	0.160087	0		0	undetermined
Q8NBU5	ATPase family AAA domain-containing protein 1 OS=Homo sapiens OX=9606 GN=ATAD1 PE=1 SV=1	ATAD1	0.0264719	0.0319303	-0.0856074	-1.05366	-0.649054	0.575134	0.15746	0		0	undetermined
O00483	Cytochrome c oxidase subunit NDUFA4 OS=Homo sapiens OX=9606 GN=NDUFA4 PE=1 SV=1	NDUFA4	-0.0440164	0.0321776	-0.085412	-1.0533	-0.648997	0.571973	0.158466	0		0	undetermined
Q9NP77	RNA polymerase II subunit A C-terminal domain phosphatase SSU72 OS=Homo sapiens OX=9606 GN=SSU72 PE=1 SV=1	SSU72	0.0369888	0.0932124	-0.00464778	-1.05199	-0.648282	0.0871574	0.998498	0		0	undetermined
Q9BQ67	Glutamate-rich WD repeat-containing protein 1 OS=Homo sapiens OX=9606 GN=GRWD1 PE=1 SV=1	GRWD1	0.104613	0.0633506	-0.0564937	-1.0503	-0.646895	0.250074	0.365665	0		0	undetermined
Q15418	Ribosomal protein S6 kinase alpha-1 OS=Homo sapiens OX=9606 GN=RPS6KA1 PE=1 SV=2	RPS6KA1	-0.0316529	0.0616886	-0.0583985	-1.04935	-0.646243	0.263149	0.348282	0		0	undetermined
Q9BUI4	DNA-directed RNA polymerase III subunit RPC3 OS=Homo sapiens OX=9606 GN=POLR3C PE=1 SV=1	POLR3C	0.0557407	-0.042488	0.0642171	-1.04831	-0.645794	0.403099	0.227833	0		0	undetermined
Q9ULJ3	Zinc finger and BTB domain-containing protein 21 OS=Homo sapiens OX=9606 GN=ZBTB21 PE=1 SV=2	ZBTB21	0.0158268	0.0435536	-0.0763404	-1.04787	-0.645653	0.436192	0.210703	0		0	undetermined
P30520	Adenylosuccinate synthetase isozyme 2 OS=Homo sapiens OX=9606 GN=ADSS2 PE=1 SV=3	ADSS2	0.019981	-0.0741554	0.0248518	-1.0453	-0.644654	0.152602	0.604687	0		0	undetermined
Q10471	Polypeptide N-acetylgalactosaminyltransferase 2 OS=Homo sapiens OX=9606 GN=GALNT2 PE=1 SV=1	GALNT2	-0.0205355	-0.0416879	0.0646384	-1.04461	-0.644654	0.411599	0.225006	0		0	undetermined
P61247	40S ribosomal protein S3a OS=Homo sapiens OX=9606 GN=RPS3A PE=1 SV=2	RPS3A	0.207769	-0.0152906	0.083243	-1.04456	-0.644654	0.744661	0.123897	0		0	undetermined
P62081	40S ribosomal protein S7 OS=Homo sapiens OX=9606 GN=RPS7 PE=1 SV=1	RPS7	0.0251211	-0.0539386	0.0525388	-1.04391	-0.644654	0.293262	0.316456	0		0	undetermined
Q6AWC2	Protein WWC2 OS=Homo sapiens OX=9606 GN=WWC2 PE=1 SV=2	WWC2	0.0753438	0.0322776	-0.0846729	-1.0438	-0.644654	0.570698	0.162316	0		0	undetermined
P55327	Tumor protein D52 OS=Homo sapiens OX=9606 GN=TPD52 PE=1 SV=2	TPD52	0.0332757	-0.0142644	0.0837177	-1.04315	-0.644654	0.759279	0.121883	0		0	undetermined
A1X283	SH3 and PX domain-containing protein 2B OS=Homo sapiens OX=9606 GN=SH3PXD2B PE=1 SV=3	SH3PXD2B	0.0530053	-0.0108093	0.085439	-1.04126	-0.644088	0.8091	0.114792	0		0	undetermined
P62699	Protein yippee-like 5 OS=Homo sapiens OX=9606 GN=YPEL5 PE=1 SV=1	YPEL5	-0.0339098	0.0138969	-0.0954596	-1.04088	-0.644001	0.824255	0.112756	0		0	undetermined
P20340	Ras-related protein Rab-6A OS=Homo sapiens OX=9606 GN=RAB6A PE=1 SV=3	RAB6A	0.0525401	0.0708428	-0.0455991	-1.0402	-0.64382	0.196781	0.475143	0		0	undetermined
Q92878	DNA repair protein RAD50 OS=Homo sapiens OX=9606 GN=RAD50 PE=1 SV=1	RAD50	-0.00674192	-0.0742269	0.0240589	-1.03939	-0.64382	0.152218	0.614397	0		0	undetermined
P15311	Ezrin OS=Homo sapiens OX=9606 GN=EZR PE=1 SV=4	EZR	-0.00301404	-0.068105	0.0339453	-1.03923	-0.64382	0.187888	0.498617	0		0	undetermined
Q96RU2	Ubiquitin carboxyl-terminal hydrolase 28 OS=Homo sapiens OX=9606 GN=USP28 PE=1 SV=1	USP28	0.00232964	0.0560574	-0.0637631	-1.03849	-0.643746	0.310917	0.3022	0		0	undetermined
Q15942	Zyxin OS=Homo sapiens OX=9606 GN=ZYX PE=1 SV=1	ZYX	0.0147616	-0.0736276	0.0246165	-1.0351	-0.641454	0.155463	0.607562	0		0	undetermined
Q9Y5K8	V-type proton ATPase subunit D OS=Homo sapiens OX=9606 GN=ATP6V1D PE=1 SV=1	ATP6V1D	-0.076686	0.0619885	-0.0567388	-1.03472	-0.641366	0.260755	0.363398	0		0	undetermined
Q9Y6I4	Ubiquitin carboxyl-terminal hydrolase 3 OS=Homo sapiens OX=9606 GN=USP3 PE=1 SV=2	USP3	0.0414717	0.0396386	-0.0784445	-1.03327	-0.640398	0.480706	0.197599	0		0	undetermined
O76071	Probable cytosolic iron-sulfur protein assembly protein CIAO1 OS=Homo sapiens OX=9606 GN=CIAO1 PE=1 SV=1	CIAO1	-0.0139861	-0.061357	0.042693	-1.03273	-0.640398	0.233963	0.406755	0		0	undetermined
Q15293	Reticulocalbin-1 OS=Homo sapiens OX=9606 GN=RCN1 PE=1 SV=1	RCN1	-0.0512734	-0.00975793	0.0854132	-1.03259	-0.640398	0.824427	0.114896	0		0	undetermined
Q9UBK8	Methionine synthase reductase OS=Homo sapiens OX=9606 GN=MTRR PE=1 SV=4	MTRR	-0.0132065	-0.0256807	0.0759253	-1.03071	-0.639681	0.602592	0.158342	0		0	undetermined
Q13464	Rho-associated protein kinase 1 OS=Homo sapiens OX=9606 GN=ROCK1 PE=1 SV=1	ROCK1	-0.0383511	-0.0834395	0.00384406	-1.02823	-0.638945	0.108574	0.880481	0		0	undetermined
Q06481	Amyloid-like protein 2 OS=Homo sapiens OX=9606 GN=APLP2 PE=1 SV=2	APLP2	-0.0308596	0.0468004	-0.0716665	-1.02398	-0.635721	0.401147	0.242036	0		0	undetermined
Q5J8M3	ER membrane protein complex subunit 4 OS=Homo sapiens OX=9606 GN=EMC4 PE=1 SV=2	EMC4	-0.0440546	-0.0141824	0.0824525	-1.02346	-0.635721	0.760451	0.12731	0		0	undetermined
O00148	ATP-dependent RNA helicase DDX39A OS=Homo sapiens OX=9606 GN=DDX39A PE=1 SV=2	DDX39A	0.014327	0.0572229	-0.0612061	-1.02327	-0.635721	0.300588	0.323634	0		0	undetermined
P26373	60S ribosomal protein L13 OS=Homo sapiens OX=9606 GN=RPL13 PE=1 SV=4	RPL13	0.0711859	-0.0808683	0.00887834	-1.02195	-0.63518	0.119617	0.811585	0		0	undetermined
Q7Z6K3	Protein prenyltransferase alpha subunit repeat-containing protein 1 OS=Homo sapiens OX=9606 GN=PTAR1 PE=1 SV=2	PTAR1	-0.0510704	0.0104057	-0.0959581	-1.02187	-0.63518	0.875595	0.110792	0		0	undetermined
Q68E01	Integrator complex subunit 3 OS=Homo sapiens OX=9606 GN=INTS3 PE=1 SV=1	INTS3	0.0222319	0.00591701	-0.0980308	-1.02157	-0.635169	0.94235	0.102915	0		0	undetermined
Q14118	Dystroglycan OS=Homo sapiens OX=9606 GN=DAG1 PE=1 SV=2	DAG1	-0.00373312	-0.0642292	0.0377233	-1.0211	-0.634993	0.213457	0.457649	0		0	undetermined
Q14103	Heterogeneous nuclear ribonucleoprotein D0 OS=Homo sapiens OX=9606 GN=HNRNPD PE=1 SV=1	HNRNPD	0.0488938	-0.0518425	0.0528421	-1.02075	-0.634922	0.311703	0.3139	0		0	undetermined
Q13618	Cullin-3 OS=Homo sapiens OX=9606 GN=CUL3 PE=1 SV=2	CUL3	0.0256225	0.0475103	-0.070688	-1.01978	-0.634533	0.393717	0.248991	0		0	undetermined
Q99460	26S proteasome non-ATPase regulatory subunit 1 OS=Homo sapiens OX=9606 GN=PSMD1 PE=1 SV=2	PSMD1	-0.0189796	0.0378163	-0.0787351	-1.01794	-0.633631	0.502241	0.195836	0		0	undetermined
O14773	Tripeptidyl-peptidase 1 OS=Homo sapiens OX=9606 GN=TPP1 PE=1 SV=2	TPP1	0.135958	0.0250282	-0.0876133	-1.01758	-0.633631	0.666487	0.147411	0		0	undetermined
O60518	Ran-binding protein 6 OS=Homo sapiens OX=9606 GN=RANBP6 PE=1 SV=2	RANBP6	-0.0297554	0.043113	-0.0743421	-1.01676	-0.633631	0.441079	0.22372	0		0	undetermined
O00154	Cytosolic acyl coenzyme A thioester hydrolase OS=Homo sapiens OX=9606 GN=ACOT7 PE=1 SV=3	ACOT7	-0.0212018	0.0719328	-0.0415674	-1.01656	-0.633631	0.189779	0.519808	0		0	undetermined
O75131	Copine-3 OS=Homo sapiens OX=9606 GN=CPNE3 PE=1 SV=1	CPNE3	0.0143804	0.0702533	-0.0440726	-1.01656	-0.633631	0.200646	0.491802	0		0	undetermined
Q99873	Protein arginine N-methyltransferase 1 OS=Homo sapiens OX=9606 GN=PRMT1 PE=1 SV=3	PRMT1	0.0107022	0.056752	-0.061123	-1.01631	-0.633631	0.304734	0.324347	0		0	undetermined
P48506	Glutamate--cysteine ligase catalytic subunit OS=Homo sapiens OX=9606 GN=GCLC PE=1 SV=2	GCLC	0.0198491	0.0739887	-0.038219	-1.01529	-0.632903	0.177075	0.558482	0		0	undetermined
P04040	Catalase OS=Homo sapiens OX=9606 GN=CAT PE=1 SV=3	CAT	-0.0670114	-0.0439567	0.0601418	-1.01345	-0.63217	0.387773	0.2565	0		0	undetermined
Q00169	Phosphatidylinositol transfer protein alpha isoform OS=Homo sapiens OX=9606 GN=PITPNA PE=1 SV=2	PITPNA	-0.128308	0.0782255	-0.0307716	-1.01316	-0.63217	0.15291	0.649193	0		0	undetermined
Q9BQG0	Myb-binding protein 1A OS=Homo sapiens OX=9606 GN=MYBBP1A PE=1 SV=2	MYBBP1A	0.11344	0.0672305	-0.0479915	-1.01297	-0.63217	0.221336	0.44967	0		0	undetermined
Q9NZN5	Rho guanine nucleotide exchange factor 12 OS=Homo sapiens OX=9606 GN=ARHGEF12 PE=1 SV=1	ARHGEF12	-0.10061	0.048646	-0.0690064	-1.01197	-0.632134	0.382004	0.261267	0		0	undetermined
O75718	Cartilage-associated protein OS=Homo sapiens OX=9606 GN=CRTAP PE=1 SV=1	CRTAP	0.0291229	0.0748625	-0.0363309	-1.01102	-0.631896	0.171872	0.580891	0		0	undetermined
Q9BWM7	Sideroflexin-3 OS=Homo sapiens OX=9606 GN=SFXN3 PE=1 SV=3	SFXN3	0.18173	0.0381615	-0.0779504	-1.011	-0.631896	0.498122	0.20062	0		0	undetermined
Q9NWS0	PIH1 domain-containing protein 1 OS=Homo sapiens OX=9606 GN=PIH1D1 PE=1 SV=1	PIH1D1	0.0277731	0.0730112	-0.0390885	-1.00892	-0.631403	0.183034	0.548306	0		0	undetermined
Q07065	Cytoskeleton-associated protein 4 OS=Homo sapiens OX=9606 GN=CKAP4 PE=1 SV=2	CKAP4	0.0493603	-0.0820183	0.00433554	-1.00818	-0.631403	0.114574	0.873706	0		0	undetermined
O75312	Zinc finger protein ZPR1 OS=Homo sapiens OX=9606 GN=ZPR1 PE=1 SV=1	ZPR1	-0.00328408	-0.0392557	0.0639376	-1.00817	-0.631403	0.43808	0.229723	0		0	undetermined
Q9Y4K0	Lysyl oxidase homolog 2 OS=Homo sapiens OX=9606 GN=LOXL2 PE=1 SV=1	LOXL2	0.0252818	0.0116313	-0.094459	-1.00813	-0.631403	0.857501	0.11678	0		0	undetermined
Q9H9E3	Conserved oligomeric Golgi complex subunit 4 OS=Homo sapiens OX=9606 GN=COG4 PE=1 SV=3	COG4	-0.101874	0.0763906	-0.0332761	-1.0068	-0.630528	0.163048	0.61801	0		0	undetermined
P08237	ATP-dependent 6-phosphofructokinase, muscle type OS=Homo sapiens OX=9606 GN=PFKM PE=1 SV=2	PFKM	0.044889	0.0777622	-0.0308326	-1.00657	-0.630528	0.155424	0.648427	0		0	undetermined
Q8WV24	Pleckstrin homology-like domain family A member 1 OS=Homo sapiens OX=9606 GN=PHLDA1 PE=1 SV=4	PHLDA1	-0.0587895	0.0776352	-0.0310181	-1.0062	-0.630528	0.156118	0.646096	0		0	undetermined
Q8IWB9	Testis-expressed protein 2 OS=Homo sapiens OX=9606 GN=TEX2 PE=1 SV=2	TEX2	0.0880821	-0.0364271	0.0661559	-1.00613	-0.630528	0.470076	0.215028	0		0	undetermined
Q9NQS1	Cell death regulator Aven OS=Homo sapiens OX=9606 GN=AVEN PE=1 SV=1	AVEN	-0.0256414	-0.0814886	0.0051786	-1.00541	-0.630086	0.116876	0.862107	0		0	undetermined
P23919	Thymidylate kinase OS=Homo sapiens OX=9606 GN=DTYMK PE=1 SV=4	DTYMK	0.046415	0.0894469	-0.00237439	-1.00189	-0.627682	0.101022	0.966792	0		0	undetermined
Q6PKG0	La-related protein 1 OS=Homo sapiens OX=9606 GN=LARP1 PE=1 SV=2	LARP1	-0.0145303	-0.0525986	0.050208	-0.999797	-0.62676	0.304965	0.336545	0		0	undetermined
P10619	Lysosomal protective protein OS=Homo sapiens OX=9606 GN=CTSA PE=1 SV=2	CTSA	-0.0734402	0.00521488	-0.096943	-0.99974	-0.62676	0.952841	0.106992	0		0	undetermined
Q9H8U3	AN1-type zinc finger protein 3 OS=Homo sapiens OX=9606 GN=ZFAND3 PE=1 SV=1	ZFAND3	0.042738	-0.0766198	0.0148377	-0.999568	-0.62676	0.13977	0.731916	0		0	undetermined
P27986	Phosphatidylinositol 3-kinase regulatory subunit alpha OS=Homo sapiens OX=9606 GN=PIK3R1 PE=1 SV=2	PIK3R1	0.00263852	0.0302716	-0.0828588	-0.998845	-0.626315	0.596544	0.172063	0		0	undetermined
Q10567	AP-1 complex subunit beta-1 OS=Homo sapiens OX=9606 GN=AP1B1 PE=1 SV=2	AP1B1	-0.0337092	0.0443337	-0.0718618	-0.998428	-0.626177	0.427615	0.240664	0		0	undetermined
P48444	Coatomer subunit delta OS=Homo sapiens OX=9606 GN=ARCN1 PE=1 SV=1	ARCN1	0.00843248	-0.0109843	0.0824263	-0.997109	-0.625137	0.806557	0.127424	0		0	undetermined
Q99720	Sigma non-opioid intracellular receptor 1 OS=Homo sapiens OX=9606 GN=SIGMAR1 PE=1 SV=1	SIGMAR1	-0.0116111	0.0705303	-0.0413845	-0.994463	-0.623674	0.198823	0.521883	0		0	undetermined
O95602	DNA-directed RNA polymerase I subunit RPA1 OS=Homo sapiens OX=9606 GN=POLR1A PE=1 SV=2	POLR1A	0.0600761	-0.0320747	0.0687082	-0.994258	-0.623674	0.521735	0.198973	0		0	undetermined
Q99623	Prohibitin-2 OS=Homo sapiens OX=9606 GN=PHB2 PE=1 SV=2	PHB2	-0.00422915	-0.0601389	0.0405245	-0.993138	-0.622831	0.243068	0.428534	0		0	undetermined
Q08378	Golgin subfamily A member 3 OS=Homo sapiens OX=9606 GN=GOLGA3 PE=1 SV=2	GOLGA3	-0.0156863	-0.0442172	0.0582104	-0.992546	-0.622516	0.385092	0.270926	0		0	undetermined
P98082	Disabled homolog 2 OS=Homo sapiens OX=9606 GN=DAB2 PE=1 SV=3	DAB2	-0.00227212	0.0200841	-0.0888396	-0.992172	-0.622508	0.735221	0.141514	0		0	undetermined
Q9UFW8	CGG triplet repeat-binding protein 1 OS=Homo sapiens OX=9606 GN=CGGBP1 PE=1 SV=2	CGGBP1	-0.063405	-0.0618447	0.0380821	-0.991378	-0.622179	0.230385	0.453859	0		0	undetermined
P53350	Serine/threonine-protein kinase PLK1 OS=Homo sapiens OX=9606 GN=PLK1 PE=1 SV=1	PLK1	0.052227	0.0561301	-0.0593409	-0.98793	-0.62031	0.310266	0.339878	0		0	undetermined
O60884	DnaJ homolog subfamily A member 2 OS=Homo sapiens OX=9606 GN=DNAJA2 PE=1 SV=1	DNAJA2	0.0389326	-0.0166915	0.078448	-0.985612	-0.618894	0.724855	0.14573	0		0	undetermined
Q9BXS5	AP-1 complex subunit mu-1 OS=Homo sapiens OX=9606 GN=AP1M1 PE=1 SV=3	AP1M1	-0.0155889	0.0610833	-0.05328	-0.984789	-0.618346	0.268025	0.396197	0		0	undetermined
Q8IVD9	NudC domain-containing protein 3 OS=Homo sapiens OX=9606 GN=NUDCD3 PE=1 SV=3	NUDCD3	0.0228224	-0.0248673	0.0731247	-0.983573	-0.617404	0.613269	0.173292	0		0	undetermined
Q13011	Delta(3,5)-Delta(2,4)-dienoyl-CoA isomerase, mitochondrial OS=Homo sapiens OX=9606 GN=ECH1 PE=1 SV=2	ECH1	-0.0405042	0.0588987	-0.0555082	-0.980424	-0.615129	0.286143	0.374868	0		0	undetermined
Q8IZ52	Chondroitin sulfate synthase 2 OS=Homo sapiens OX=9606 GN=CHPF PE=1 SV=2	CHPF	-0.00902474	0.0365952	-0.0766407	-0.977243	-0.613537	0.516951	0.208795	0		0	undetermined
O43813	Glutathione S-transferase LANCL1 OS=Homo sapiens OX=9606 GN=LANCL1 PE=1 SV=1	LANCL1	0.0661324	0.0240292	-0.085214	-0.974245	-0.612466	0.680174	0.159491	0		0	undetermined
P28070	Proteasome subunit beta type-4 OS=Homo sapiens OX=9606 GN=PSMB4 PE=1 SV=4	PSMB4	-0.0691873	0.0393671	-0.0741454	-0.973538	-0.612282	0.483882	0.225032	0		0	undetermined
Q9BYN8	28S ribosomal protein S26, mitochondrial OS=Homo sapiens OX=9606 GN=MRPS26 PE=1 SV=1	MRPS26	-0.0456994	0.016022	-0.0897865	-0.972504	-0.61152	0.793355	0.137085	0		0	undetermined
Q7KZN9	Cytochrome c oxidase assembly protein COX15 homolog OS=Homo sapiens OX=9606 GN=COX15 PE=1 SV=1	COX15	-0.0233961	-0.0729302	0.0184389	-0.971588	-0.611411	0.159307	0.685077	0		0	undetermined
Q13131	5'-AMP-activated protein kinase catalytic subunit alpha-1 OS=Homo sapiens OX=9606 GN=PRKAA1 PE=1 SV=4	PRKAA1	0.0244067	0.0420083	-0.071777	-0.971582	-0.611411	0.453471	0.241259	0		0	undetermined
O75534	Cold shock domain-containing protein E1 OS=Homo sapiens OX=9606 GN=CSDE1 PE=1 SV=2	CSDE1	0.0437551	-0.0502073	0.0502466	-0.970205	-0.610432	0.326609	0.336205	0		0	undetermined
Q13907	Isopentenyl-diphosphate Delta-isomerase 1 OS=Homo sapiens OX=9606 GN=IDI1 PE=1 SV=2	IDI1	0.0698017	0.0165882	-0.089302	-0.969963	-0.610432	0.785175	0.139337	0		0	undetermined
Q8WTS6	Histone-lysine N-methyltransferase SETD7 OS=Homo sapiens OX=9606 GN=SETD7 PE=1 SV=1	SETD7	-0.0340779	-0.0481346	0.0523053	-0.968529	-0.609709	0.346157	0.318432	0		0	undetermined
O75396	Vesicle-trafficking protein SEC22b OS=Homo sapiens OX=9606 GN=SEC22B PE=1 SV=4	SEC22B	-0.0431108	-0.0587086	0.0397485	-0.965692	-0.607681	0.254074	0.43649	0		0	undetermined
Q8WU76	Sec1 family domain-containing protein 2 OS=Homo sapiens OX=9606 GN=SCFD2 PE=1 SV=2	SCFD2	0.0872326	0.0355358	-0.0765587	-0.965294	-0.607553	0.529891	0.209315	0		0	undetermined
Q96SB4	SRSF protein kinase 1 OS=Homo sapiens OX=9606 GN=SRPK1 PE=1 SV=2	SRPK1	0.0719867	0.0420248	-0.0712192	-0.96468	-0.607208	0.453285	0.245197	0		0	undetermined
Q9NQW6	Anillin OS=Homo sapiens OX=9606 GN=ANLN PE=1 SV=2	ANLN	-0.0238041	-0.0685604	0.0251338	-0.963626	-0.607189	0.185039	0.601251	0		0	undetermined
Q2PZI1	Probable C-mannosyltransferase DPY19L1 OS=Homo sapiens OX=9606 GN=DPY19L1 PE=2 SV=1	DPY19L1	0.0285956	0.0242435	-0.0843254	-0.963586	-0.607189	0.677228	0.16415	0		0	undetermined
Q9UID3	Vacuolar protein sorting-associated protein 51 homolog OS=Homo sapiens OX=9606 GN=VPS51 PE=1 SV=2	VPS51	-0.0060258	-0.0114986	0.0797932	-0.962247	-0.6068	0.799092	0.139327	0		0	undetermined
O43318	Mitogen-activated protein kinase kinase kinase 7 OS=Homo sapiens OX=9606 GN=MAP3K7 PE=1 SV=1	MAP3K7	-0.0551532	-0.0461067	0.0538387	-0.962125	-0.6068	0.36599	0.305601	0		0	undetermined
P10109	Adrenodoxin, mitochondrial OS=Homo sapiens OX=9606 GN=FDX1 PE=1 SV=1	FDX1	-0.0112026	-0.068033	0.0257982	-0.961834	-0.606777	0.188341	0.59319	0		0	undetermined
O00429	Dynamin-1-like protein OS=Homo sapiens OX=9606 GN=DNM1L PE=1 SV=2	DNM1L	-0.0141763	0.0483489	-0.0650875	-0.960587	-0.605798	0.385047	0.291479	0		0	undetermined
P04075	Fructose-bisphosphate aldolase A OS=Homo sapiens OX=9606 GN=ALDOA PE=1 SV=2	ALDOA	0.0172506	-0.0298488	0.0678097	-0.959661	-0.605375	0.54924	0.204522	0		0	undetermined
Q96EX3	WD repeat-containing protein 34 OS=Homo sapiens OX=9606 GN=WDR34 PE=1 SV=2	WDR34	-0.0678539	0.0414063	-0.0713532	-0.95963	-0.605375	0.460306	0.244248	0		0	undetermined
O75717	WD repeat and HMG-box DNA-binding protein 1 OS=Homo sapiens OX=9606 GN=WDHD1 PE=1 SV=1	WDHD1	0.00212727	-0.00623321	0.0823276	-0.959062	-0.605341	0.876264	0.127856	0		0	undetermined
Q9BVV7	Mitochondrial import inner membrane translocase subunit Tim21 OS=Homo sapiens OX=9606 GN=TIMM21 PE=1 SV=1	TIMM21	0.104903	0.0767845	-0.0267195	-0.957344	-0.604345	0.16083	0.700955	0		0	undetermined
Q15642	Cdc42-interacting protein 4 OS=Homo sapiens OX=9606 GN=TRIP10 PE=1 SV=3	TRIP10	0.0749495	-0.0586975	0.0389465	-0.957267	-0.604345	0.25416	0.444801	0		0	undetermined
O14964	Hepatocyte growth factor-regulated tyrosine kinase substrate OS=Homo sapiens OX=9606 GN=HGS PE=1 SV=1	HGS	0.0534568	-0.00430595	0.0830791	-0.956144	-0.603584	0.904849	0.124599	0		0	undetermined
Q96DG6	Carboxymethylenebutenolidase homolog OS=Homo sapiens OX=9606 GN=CMBL PE=1 SV=1	CMBL	0.022473	0.0612061	-0.0504141	-0.955961	-0.603584	0.267031	0.424682	0		0	undetermined
P49916	DNA ligase 3 OS=Homo sapiens OX=9606 GN=LIG3 PE=1 SV=2	LIG3	0.0337389	0.0332166	-0.0775504	-0.955153	-0.603561	0.558785	0.203092	0		0	undetermined
Q96A26	Protein FAM162A OS=Homo sapiens OX=9606 GN=FAM162A PE=1 SV=2	FAM162A	0.0669645	-0.00753575	0.0813459	-0.954252	-0.603397	0.857034	0.132209	0		0	undetermined
P48426	Phosphatidylinositol 5-phosphate 4-kinase type-2 alpha OS=Homo sapiens OX=9606 GN=PIP4K2A PE=1 SV=2	PIP4K2A	-0.0927432	-0.0492305	0.0498222	-0.953289	-0.603022	0.335731	0.339947	0		0	undetermined
Q9GZZ1	N-alpha-acetyltransferase 50 OS=Homo sapiens OX=9606 GN=NAA50 PE=1 SV=1	NAA50	-0.0218295	0.0736825	-0.0317046	-0.952549	-0.602687	0.178926	0.637502	0		0	undetermined
Q9H8S9	MOB kinase activator 1A OS=Homo sapiens OX=9606 GN=MOB1A PE=1 SV=4	MOB1A	0.0829643	0.086037	-0.00564542	-0.952284	-0.602687	0.115043	0.987585	0		0	undetermined
Q9NUY8	TBC1 domain family member 23 OS=Homo sapiens OX=9606 GN=TBC1D23 PE=1 SV=3	TBC1D23	0.00721987	0.0148594	-0.0889362	-0.950766	-0.602415	0.810223	0.141057	0		0	undetermined
Q9Y316	Protein MEMO1 OS=Homo sapiens OX=9606 GN=MEMO1 PE=1 SV=1	MEMO1	0.0867275	-0.0689394	0.022897	-0.949536	-0.601645	0.182692	0.628746	0		0	undetermined
Q9Y570	Protein phosphatase methylesterase 1 OS=Homo sapiens OX=9606 GN=PPME1 PE=1 SV=3	PPME1	-0.0591087	0.0703584	-0.0368093	-0.949256	-0.601628	0.199953	0.575173	0		0	undetermined
Q96ER9	Mitochondrial potassium channel OS=Homo sapiens OX=9606 GN=CCDC51 PE=1 SV=2	CCDC51	0.109107	-0.0539405	0.0440502	-0.948459	-0.601171	0.293246	0.393466	0		0	undetermined
Q8IWB7	WD repeat and FYVE domain-containing protein 1 OS=Homo sapiens OX=9606 GN=WDFY1 PE=1 SV=1	WDFY1	-0.0228812	0.063532	-0.0466374	-0.948273	-0.601171	0.248675	0.463992	0		0	undetermined
O75822	Eukaryotic translation initiation factor 3 subunit J OS=Homo sapiens OX=9606 GN=EIF3J PE=1 SV=2	EIF3J	0.0487123	-0.0187565	0.0745262	-0.947492	-0.600915	0.695996	0.165683	0		0	undetermined
P53365	Arfaptin-2 OS=Homo sapiens OX=9606 GN=ARFIP2 PE=1 SV=1	ARFIP2	0.103283	0.055054	-0.0566919	-0.944562	-0.599545	0.319995	0.363831	0		0	undetermined
Q8TB52	F-box only protein 30 OS=Homo sapiens OX=9606 GN=FBXO30 PE=1 SV=3	FBXO30	0.0457663	0.0823088	-0.0136114	-0.94455	-0.599545	0.132078	0.876945	0		0	undetermined
O94973	AP-2 complex subunit alpha-2 OS=Homo sapiens OX=9606 GN=AP2A2 PE=1 SV=2	AP2A2	0.0280607	0.0432688	-0.0684045	-0.943154	-0.599052	0.439347	0.26576	0		0	undetermined
O94760	N(G),N(G)-dimethylarginine dimethylaminohydrolase 1 OS=Homo sapiens OX=9606 GN=DDAH1 PE=1 SV=3	DDAH1	0.0389468	-0.0492961	0.0488447	-0.943	-0.599052	0.335112	0.348667	0		0	undetermined
Q8NB37	Glutamine amidotransferase-like class 1 domain-containing protein 1 OS=Homo sapiens OX=9606 GN=GATD1 PE=1 SV=1	GATD1	0.0314597	0.0843851	-0.0083852	-0.942811	-0.599052	0.122365	0.949396	0		0	undetermined
Q9UJV9	Probable ATP-dependent RNA helicase DDX41 OS=Homo sapiens OX=9606 GN=DDX41 PE=1 SV=2	DDX41	0.0518538	-0.0320333	0.0646641	-0.940419	-0.598297	0.52224	0.224834	0		0	undetermined
P25789	Proteasome subunit alpha type-4 OS=Homo sapiens OX=9606 GN=PSMA4 PE=1 SV=1	PSMA4	-0.148115	0.0720017	-0.033133	-0.940239	-0.598297	0.189343	0.619774	0		0	undetermined
O75419	Cell division control protein 45 homolog OS=Homo sapiens OX=9606 GN=CDC45 PE=1 SV=1	CDC45	0.0750696	0.0259112	-0.0815512	-0.93994	-0.598297	0.654481	0.179355	0		0	undetermined
Q9NXG2	THUMP domain-containing protein 1 OS=Homo sapiens OX=9606 GN=THUMPD1 PE=1 SV=2	THUMPD1	0.019211	0.0805395	-0.0168668	-0.939657	-0.598297	0.140817	0.832292	0		0	undetermined
Q96CX2	BTB/POZ domain-containing protein KCTD12 OS=Homo sapiens OX=9606 GN=KCTD12 PE=1 SV=1	KCTD12	-0.201432	0.0609133	-0.0490919	-0.938321	-0.597721	0.269407	0.438218	0		0	undetermined
Q9NVG8	TBC1 domain family member 13 OS=Homo sapiens OX=9606 GN=TBC1D13 PE=1 SV=3	TBC1D13	0.0356177	0.0652088	-0.0433235	-0.938259	-0.597721	0.236001	0.500091	0		0	undetermined
O94788	Retinal dehydrogenase 2 OS=Homo sapiens OX=9606 GN=ALDH1A2 PE=1 SV=3	ALDH1A2	-0.0188785	0.0794617	-0.0189448	-0.938045	-0.597721	0.146355	0.804061	0		0	undetermined
Q9UJZ1	Stomatin-like protein 2, mitochondrial OS=Homo sapiens OX=9606 GN=STOML2 PE=1 SV=1	STOML2	-0.0492307	-0.0456169	0.0521959	-0.937018	-0.597045	0.370883	0.319361	0		0	undetermined
P50750	Cyclin-dependent kinase 9 OS=Homo sapiens OX=9606 GN=CDK9 PE=1 SV=3	CDK9	0.0457635	-0.0372539	0.0600541	-0.936853	-0.597045	0.460593	0.257143	0		0	undetermined
O94855	Protein transport protein Sec24D OS=Homo sapiens OX=9606 GN=SEC24D PE=1 SV=2	SEC24D	-0.0576143	0.0353729	-0.0744089	-0.935412	-0.596636	0.531896	0.223276	0		0	undetermined
Q9H9Y6	DNA-directed RNA polymerase I subunit RPA2 OS=Homo sapiens OX=9606 GN=POLR1B PE=1 SV=2	POLR1B	0.017697	0.0430265	-0.0679401	-0.934741	-0.596264	0.442042	0.269264	0		0	undetermined
P00387	NADH-cytochrome b5 reductase 3 OS=Homo sapiens OX=9606 GN=CYB5R3 PE=1 SV=3	CYB5R3	0.0359141	-0.0338034	0.0627826	-0.934525	-0.596264	0.500873	0.237652	0		0	undetermined
Q14558	Phosphoribosyl pyrophosphate synthase-associated protein 1 OS=Homo sapiens OX=9606 GN=PRPSAP1 PE=1 SV=2	PRPSAP1	-0.00326695	0.0714067	-0.0334383	-0.934252	-0.596249	0.193136	0.616013	0		0	undetermined
Q29983	MHC class I polypeptide-related sequence A OS=Homo sapiens OX=9606 GN=MICA PE=1 SV=1	MICA	0.0966552	0.015673	-0.0872995	-0.933486	-0.59574	0.798409	0.14895	0		0	undetermined
Q9Y608	Leucine-rich repeat flightless-interacting protein 2 OS=Homo sapiens OX=9606 GN=LRRFIP2 PE=1 SV=1	LRRFIP2	-0.119217	0.0779582	-0.0212205	-0.931934	-0.594981	0.154357	0.773435	0		0	undetermined
Q2TAY7	WD40 repeat-containing protein SMU1 OS=Homo sapiens OX=9606 GN=SMU1 PE=1 SV=2	SMU1	0.0237779	0.0110579	-0.0896475	-0.931842	-0.594981	0.865958	0.137728	0		0	undetermined
P27824	Calnexin OS=Homo sapiens OX=9606 GN=CANX PE=1 SV=2	CANX	0.0871973	-0.00444824	0.0813246	-0.93101	-0.594905	0.902734	0.132305	0		0	undetermined
P53618	Coatomer subunit beta OS=Homo sapiens OX=9606 GN=COPB1 PE=1 SV=3	COPB1	0.0478916	0.0504047	-0.0604746	-0.930598	-0.594905	0.364293	0.329943	0		0	undetermined
Q9BY44	Eukaryotic translation initiation factor 2A OS=Homo sapiens OX=9606 GN=EIF2A PE=1 SV=3	EIF2A	0.0645278	-0.0448726	0.0522549	-0.928914	-0.593988	0.378398	0.31886	0		0	undetermined
O94874	E3 UFM1-protein ligase 1 OS=Homo sapiens OX=9606 GN=UFL1 PE=1 SV=2	UFL1	-0.136806	0.000123431	-0.0938772	-0.928587	-0.593916	0.970954	0.119172	0		0	undetermined
Q96EI5	Transcription elongation factor A protein-like 4 OS=Homo sapiens OX=9606 GN=TCEAL4 PE=1 SV=2	TCEAL4	0.111133	-0.0617413	0.0317991	-0.927913	-0.593538	0.231141	0.522731	0		0	undetermined
Q8WXA9	Splicing regulatory glutamine/lysine-rich protein 1 OS=Homo sapiens OX=9606 GN=SREK1 PE=1 SV=1	SREK1	0.0533454	-0.0760846	0.00640579	-0.927699	-0.593538	0.142484	0.845276	0		0	undetermined
Q15459	Splicing factor 3A subunit 1 OS=Homo sapiens OX=9606 GN=SF3A1 PE=1 SV=1	SF3A1	0.0607897	-0.0741834	0.0102567	-0.926371	-0.592465	0.152452	0.79295	0		0	undetermined
P07108	Acyl-CoA-binding protein OS=Homo sapiens OX=9606 GN=DBI PE=1 SV=2	DBI	0.0251863	-0.0181911	0.073309	-0.925512	-0.59237	0.703857	0.172276	0		0	undetermined
Q15042	Rab3 GTPase-activating protein catalytic subunit OS=Homo sapiens OX=9606 GN=RAB3GAP1 PE=1 SV=3	RAB3GAP1	-0.0402611	-0.0715	0.0150504	-0.922489	-0.589671	0.167412	0.729118	0		0	undetermined
Q9Y2H2	Phosphatidylinositide phosphatase SAC2 OS=Homo sapiens OX=9606 GN=INPP5F PE=1 SV=3	INPP5F	0.0333046	0.0688909	-0.036152	-0.922305	-0.589671	0.209789	0.583036	0		0	undetermined
O43149	Zinc finger ZZ-type and EF-hand domain-containing protein 1 OS=Homo sapiens OX=9606 GN=ZZEF1 PE=1 SV=6	ZZEF1	-0.0476842	0.028511	-0.0784391	-0.921607	-0.58959	0.619657	0.197631	0		0	undetermined
Q05513	Protein kinase C zeta type OS=Homo sapiens OX=9606 GN=PRKCZ PE=1 SV=4	PRKCZ	-0.010461	0.0343682	-0.0741052	-0.921304	-0.58959	0.544344	0.225301	0		0	undetermined
O43795	Unconventional myosin-Ib OS=Homo sapiens OX=9606 GN=MYO1B PE=1 SV=3	MYO1B	-0.0196874	-0.0444704	0.0519987	-0.921208	-0.58959	0.382498	0.321039	0		0	undetermined
Q15714	TSC22 domain family protein 1 OS=Homo sapiens OX=9606 GN=TSC22D1 PE=1 SV=3	TSC22D1	-0.10416	0.0535516	-0.0561379	-0.919776	-0.588918	0.333908	0.368971	0		0	undetermined
P43121	Cell surface glycoprotein MUC18 OS=Homo sapiens OX=9606 GN=MCAM PE=1 SV=2	MCAM	-0.0954861	0.0804236	-0.0142352	-0.919132	-0.588527	0.141405	0.868353	0		0	undetermined
O75821	Eukaryotic translation initiation factor 3 subunit G OS=Homo sapiens OX=9606 GN=EIF3G PE=1 SV=2	EIF3G	0.0223112	-0.0199136	0.0716697	-0.917997	-0.588256	0.680012	0.181463	0		0	undetermined
O75935	Dynactin subunit 3 OS=Homo sapiens OX=9606 GN=DCTN3 PE=1 SV=1	DCTN3	-0.0355679	0.0136029	-0.0872941	-0.917071	-0.58798	0.828553	0.148977	0		0	undetermined
O75787	Renin receptor OS=Homo sapiens OX=9606 GN=ATP6AP2 PE=1 SV=2	ATP6AP2	-0.0485269	0.0845312	-0.0032617	-0.915905	-0.587319	0.121703	0.979164	0		0	undetermined
Q9NQG5	Regulation of nuclear pre-mRNA domain-containing protein 1B OS=Homo sapiens OX=9606 GN=RPRD1B PE=1 SV=1	RPRD1B	-0.0228172	-0.0647543	0.0258388	-0.914948	-0.586613	0.209853	0.592699	0		0	undetermined
P63151	Serine/threonine-protein phosphatase 2A 55 kDa regulatory subunit B alpha isoform OS=Homo sapiens OX=9606 GN=PPP2R2A PE=1 SV=1	PPP2R2A	0.0832261	-0.0157756	0.0740061	-0.914519	-0.586557	0.737785	0.168476	0		0	undetermined
Q9NTJ3	Structural maintenance of chromosomes protein 4 OS=Homo sapiens OX=9606 GN=SMC4 PE=1 SV=2	SMC4	0.00433705	-0.0407218	0.0550747	-0.914388	-0.586557	0.422002	0.295512	0		0	undetermined
Q9UEE5	Serine/threonine-protein kinase 17A OS=Homo sapiens OX=9606 GN=STK17A PE=1 SV=2	STK17A	-0.0181407	0.0692872	-0.0345325	-0.913423	-0.586094	0.207099	0.602617	0		0	undetermined
Q8TAF3	WD repeat-containing protein 48 OS=Homo sapiens OX=9606 GN=WDR48 PE=1 SV=1	WDR48	0.0265801	-0.0431783	0.0524289	-0.911179	-0.584101	0.395851	0.317385	0		0	undetermined
O15127	Secretory carrier-associated membrane protein 2 OS=Homo sapiens OX=9606 GN=SCAMP2 PE=1 SV=2	SCAMP2	-0.0437457	-0.00948897	0.0773059	-0.910304	-0.583477	0.828358	0.151341	0		0	undetermined
Q96EY1	DnaJ homolog subfamily A member 3, mitochondrial OS=Homo sapiens OX=9606 GN=DNAJA3 PE=1 SV=2	DNAJA3	0.0284696	-0.0129885	0.0752563	-0.908975	-0.582398	0.777573	0.16182	0		0	undetermined
P28066	Proteasome subunit alpha type-5 OS=Homo sapiens OX=9606 GN=PSMA5 PE=1 SV=3	PSMA5	-0.0355333	0.0617387	-0.0450857	-0.908658	-0.582332	0.262748	0.480712	0		0	undetermined
Q9BWF3	RNA-binding protein 4 OS=Homo sapiens OX=9606 GN=RBM4 PE=1 SV=1	RBM4	0.0127405	-0.0657184	0.0233419	-0.906614	-0.581193	0.20335	0.623234	0		0	undetermined
Q8N5K1	CDGSH iron-sulfur domain-containing protein 2 OS=Homo sapiens OX=9606 GN=CISD2 PE=1 SV=1	CISD2	0.140543	0.0447355	-0.0639642	-0.905702	-0.580626	0.423235	0.300556	0		0	undetermined
Q8IUR7	Armadillo repeat-containing protein 8 OS=Homo sapiens OX=9606 GN=ARMC8 PE=1 SV=2	ARMC8	-0.0170326	0.0269832	-0.0782596	-0.904973	-0.580477	0.640025	0.198725	0		0	undetermined
Q15070	Mitochondrial inner membrane protein OXA1L OS=Homo sapiens OX=9606 GN=OXA1L PE=1 SV=3	OXA1L	-0.043772	0.0553055	-0.0527646	-0.90482	-0.580477	0.317703	0.401233	0		0	undetermined
P25325	3-mercaptopyruvate sulfurtransferase OS=Homo sapiens OX=9606 GN=MPST PE=1 SV=3	MPST	-0.0446304	0.0516072	-0.0569119	-0.904659	-0.580477	0.352483	0.361803	0		0	undetermined
P40222	Alpha-taxilin OS=Homo sapiens OX=9606 GN=TXLNA PE=1 SV=3	TXLNA	-0.0385095	-0.0141639	0.0741722	-0.903366	-0.579785	0.760715	0.167581	0		0	undetermined
Q9UK73	Protein fem-1 homolog B OS=Homo sapiens OX=9606 GN=FEM1B PE=1 SV=1	FEM1B	-0.0484792	0.0828119	-0.00596879	-0.90213	-0.578842	0.129671	0.983074	0		0	undetermined
Q05209	Tyrosine-protein phosphatase non-receptor type 12 OS=Homo sapiens OX=9606 GN=PTPN12 PE=1 SV=3	PTPN12	-0.0196108	0.00457881	-0.0907613	-0.901677	-0.578842	0.962352	0.132638	0		0	undetermined
Q7L5N1	COP9 signalosome complex subunit 6 OS=Homo sapiens OX=9606 GN=COPS6 PE=1 SV=1	COPS6	0.00768898	0.0428343	-0.0653556	-0.901153	-0.578619	0.444187	0.28934	0		0	undetermined
Q16186	Proteasomal ubiquitin receptor ADRM1 OS=Homo sapiens OX=9606 GN=ADRM1 PE=1 SV=2	ADRM1	-0.0940402	0.0712288	-0.0298706	-0.900957	-0.578619	0.19428	0.660569	0		0	undetermined
O95155	Ubiquitin conjugation factor E4 B OS=Homo sapiens OX=9606 GN=UBE4B PE=1 SV=1	UBE4B	-0.0434221	0.0475453	-0.0607541	-0.900186	-0.578212	0.393353	0.327524	0		0	undetermined
Q9Y375	Complex I intermediate-associated protein 30, mitochondrial OS=Homo sapiens OX=9606 GN=NDUFAF1 PE=1 SV=2	NDUFAF1	0.0100775	0.0819898	-0.00744054	-0.898363	-0.576769	0.133622	0.962555	0		0	undetermined
P49915	GMP synthase [glutamine-hydrolyzing] OS=Homo sapiens OX=9606 GN=GMPS PE=1 SV=1	GMPS	0.0527161	-0.0145347	0.0734999	-0.897042	-0.575696	0.755419	0.17123	0		0	undetermined
O75116	Rho-associated protein kinase 2 OS=Homo sapiens OX=9606 GN=ROCK2 PE=1 SV=4	ROCK2	-0.027503	-0.047635	0.0465236	-0.896794	-0.575696	0.350979	0.369936	0		0	undetermined
P26440	Isovaleryl-CoA dehydrogenase, mitochondrial OS=Homo sapiens OX=9606 GN=IVD PE=1 SV=2	IVD	-0.0366104	0.0796924	-0.0125779	-0.896251	-0.5754	0.145156	0.89121	0		0	undetermined
Q9Y5B0	RNA polymerase II subunit A C-terminal domain phosphatase OS=Homo sapiens OX=9606 GN=CTDP1 PE=1 SV=3	CTDP1	-0.03479	0.0512807	-0.0563259	-0.894209	-0.573852	0.355666	0.367222	0		0	undetermined
Q53H96	Pyrroline-5-carboxylate reductase 3 OS=Homo sapiens OX=9606 GN=PYCR3 PE=1 SV=3	PYCR3	0.0119322	0.0510208	-0.0565244	-0.893287	-0.573329	0.358212	0.365381	0		0	undetermined
P68366	Tubulin alpha-4A chain OS=Homo sapiens OX=9606 GN=TUBA4A PE=1 SV=1	TUBA4A	0.0293103	-0.0679459	0.0178709	-0.892541	-0.573329	0.188891	0.69239	0		0	undetermined
Q5JRA6	Transport and Golgi organization protein 1 homolog OS=Homo sapiens OX=9606 GN=MIA3 PE=1 SV=1	MIA3	-0.0560697	-0.0518208	0.0413271	-0.892441	-0.573329	0.311898	0.420395	0		0	undetermined
Q13443	Disintegrin and metalloproteinase domain-containing protein 9 OS=Homo sapiens OX=9606 GN=ADAM9 PE=1 SV=1	ADAM9	-0.0993953	0.0492059	-0.0583512	-0.892155	-0.573329	0.376309	0.348706	0		0	undetermined
Q13642	Four and a half LIM domains protein 1 OS=Homo sapiens OX=9606 GN=FHL1 PE=1 SV=4	FHL1	0.196781	-0.0239054	0.067054	-0.892118	-0.573329	0.626004	0.209275	0		0	undetermined
O95232	Luc7-like protein 3 OS=Homo sapiens OX=9606 GN=LUC7L3 PE=1 SV=2	LUC7L3	0.0519135	-0.0677376	0.018057	-0.891029	-0.572644	0.19021	0.689992	0		0	undetermined
P30154	Serine/threonine-protein phosphatase 2A 65 kDa regulatory subunit A beta isoform OS=Homo sapiens OX=9606 GN=PPP2R1B PE=1 SV=3	PPP2R1B	-0.112135	0.0584885	-0.0474851	-0.890161	-0.572363	0.289635	0.454997	0		0	undetermined
P54819	Adenylate kinase 2, mitochondrial OS=Homo sapiens OX=9606 GN=AK2 PE=1 SV=2	AK2	0.0378137	-0.0416497	0.0520896	-0.889689	-0.572363	0.412007	0.320265	0		0	undetermined
P49207	60S ribosomal protein L34 OS=Homo sapiens OX=9606 GN=RPL34 PE=1 SV=3	RPL34	0.189897	-0.0736976	0.00623802	-0.889543	-0.572363	0.155082	0.847573	0		0	undetermined
P27816	Microtubule-associated protein 4 OS=Homo sapiens OX=9606 GN=MAP4 PE=1 SV=3	MAP4	0.0245863	-0.0539622	0.0381561	-0.886871	-0.570701	0.293059	0.453079	0		0	undetermined
P36639	7,8-dihydro-8-oxoguanine triphosphatase OS=Homo sapiens OX=9606 GN=NUDT1 PE=1 SV=3	NUDT1	0.0237143	0.0534951	-0.0531849	-0.886858	-0.570701	0.334438	0.397123	0		0	undetermined
Q8N954	G patch domain-containing protein 11 OS=Homo sapiens OX=9606 GN=GPATCH11 PE=1 SV=4	GPATCH11	0.09288	-0.0597424	0.0303094	-0.886402	-0.570701	0.246085	0.539813	0		0	undetermined
Q03252	Lamin-B2 OS=Homo sapiens OX=9606 GN=LMNB2 PE=1 SV=4	LMNB2	-0.0156503	-0.053727	0.038405	-0.886389	-0.570701	0.29509	0.450463	0		0	undetermined
Q99747	Gamma-soluble NSF attachment protein OS=Homo sapiens OX=9606 GN=NAPG PE=1 SV=1	NAPG	-0.0270585	0.0637593	-0.0398496	-0.88518	-0.569993	0.246929	0.539475	0		0	undetermined
Q96H79	Zinc finger CCCH-type antiviral protein 1-like OS=Homo sapiens OX=9606 GN=ZC3HAV1L PE=1 SV=2	ZC3HAV1L	-0.066141	0.00536277	-0.0892486	-0.884824	-0.569993	0.950631	0.139587	0		0	undetermined
P25786	Proteasome subunit alpha type-1 OS=Homo sapiens OX=9606 GN=PSMA1 PE=1 SV=1	PSMA1	-0.0442576	0.081534	-0.000637496	-0.884587	-0.569993	0.135852	0.942601	0		0	undetermined
Q96E11	Ribosome-recycling factor, mitochondrial OS=Homo sapiens OX=9606 GN=MRRF PE=1 SV=1	MRRF	-0.0770085	0.0519887	-0.0546618	-0.884461	-0.569993	0.348789	0.382885	0		0	undetermined
Q9UPT8	Zinc finger CCCH domain-containing protein 4 OS=Homo sapiens OX=9606 GN=ZC3H4 PE=1 SV=3	ZC3H4	-0.0335221	-0.0546229	0.0368507	-0.882178	-0.569252	0.287403	0.46694	0		0	undetermined
P21399	Cytoplasmic aconitate hydratase OS=Homo sapiens OX=9606 GN=ACO1 PE=1 SV=3	ACO1	-0.0217067	0.0418348	-0.0646626	-0.88187	-0.569252	0.455435	0.294891	0		0	undetermined
O95486	Protein transport protein Sec24A OS=Homo sapiens OX=9606 GN=SEC24A PE=1 SV=2	SEC24A	-0.00698286	0.0540986	-0.0520136	-0.881775	-0.569252	0.328798	0.40864	0		0	undetermined
Q01543	Friend leukemia integration 1 transcription factor OS=Homo sapiens OX=9606 GN=FLI1 PE=1 SV=1	FLI1	0.0169748	0.052599	-0.0534553	-0.878793	-0.566513	0.342928	0.394493	0		0	undetermined
Q8WW59	SPRY domain-containing protein 4 OS=Homo sapiens OX=9606 GN=SPRYD4 PE=1 SV=2	SPRYD4	-0.00732426	0.0137921	-0.0844251	-0.877634	-0.566081	0.825787	0.163622	0		0	undetermined
Q8WXI9	Transcriptional repressor p66-beta OS=Homo sapiens OX=9606 GN=GATAD2B PE=1 SV=1	GATAD2B	0.00761396	-0.0625559	0.0247866	-0.87465	-0.56423	0.22524	0.605484	0		0	undetermined
Q6GMV3	Putative peptidyl-tRNA hydrolase PTRHD1 OS=Homo sapiens OX=9606 GN=PTRHD1 PE=1 SV=1	PTRHD1	-0.00591384	-0.03204	0.059475	-0.874574	-0.56423	0.522159	0.261418	0		0	undetermined
P38159	RNA-binding motif protein, X chromosome OS=Homo sapiens OX=9606 GN=RBMX PE=1 SV=3	RBMX	-0.0143703	-0.0740267	0.0033215	-0.874197	-0.564094	0.153296	0.887694	0		0	undetermined
Q9UPN3	Microtubule-actin cross-linking factor 1, isoforms 1/2/3/5 OS=Homo sapiens OX=9606 GN=MACF1 PE=1 SV=4	MACF1	-0.02253	-0.0601407	0.0283206	-0.873312	-0.563873	0.243054	0.563047	0		0	undetermined
Q9P2B4	CTTNBP2 N-terminal-like protein OS=Homo sapiens OX=9606 GN=CTTNBP2NL PE=1 SV=2	CTTNBP2NL	-0.00465011	-0.00401078	0.0775073	-0.872111	-0.562972	0.909239	0.15034	0		0	undetermined
Q01658	Protein Dr1 OS=Homo sapiens OX=9606 GN=DR1 PE=1 SV=1	DR1	0.0798783	0.046913	-0.058918	-0.871858	-0.56296	0.399964	0.343633	0		0	undetermined
Q9Y3P9	Rab GTPase-activating protein 1 OS=Homo sapiens OX=9606 GN=RABGAP1 PE=1 SV=3	RABGAP1	-0.0367921	0.0366409	-0.068245	-0.870274	-0.562034	0.516396	0.26696	0		0	undetermined
Q6UB35	Monofunctional C1-tetrahydrofolate synthase, mitochondrial OS=Homo sapiens OX=9606 GN=MTHFD1L PE=1 SV=1	MTHFD1L	-0.0115116	-0.0282649	0.0621423	-0.870175	-0.562034	0.569237	0.242129	0		0	undetermined
P52630	Signal transducer and activator of transcription 2 OS=Homo sapiens OX=9606 GN=STAT2 PE=1 SV=1	STAT2	0.0247775	0.0342242	-0.0701963	-0.869971	-0.562034	0.546138	0.252538	0		0	undetermined
O60506	Heterogeneous nuclear ribonucleoprotein Q OS=Homo sapiens OX=9606 GN=SYNCRIP PE=1 SV=2	SYNCRIP	0.0566322	-0.00882975	0.0748098	-0.869686	-0.562024	0.838013	0.164174	0		0	undetermined
Q13426	DNA repair protein XRCC4 OS=Homo sapiens OX=9606 GN=XRCC4 PE=1 SV=2	XRCC4	-0.0146239	0.0234522	-0.0778372	-0.867436	-0.560458	0.688127	0.201318	0		0	undetermined
Q9H944	Mediator of RNA polymerase II transcription subunit 20 OS=Homo sapiens OX=9606 GN=MED20 PE=1 SV=1	MED20	-0.02172	0.00788328	-0.0867793	-0.866843	-0.560105	0.91303	0.151528	0		0	undetermined
Q09161	Nuclear cap-binding protein subunit 1 OS=Homo sapiens OX=9606 GN=NCBP1 PE=1 SV=1	NCBP1	-0.0224263	0.000628478	-0.0898471	-0.865597	-0.559098	0.978513	0.136805	0		0	undetermined
Q9BRZ2	E3 ubiquitin-protein ligase TRIM56 OS=Homo sapiens OX=9606 GN=TRIM56 PE=1 SV=3	TRIM56	0.00365047	0.0389837	-0.0657476	-0.864263	-0.558243	0.488386	0.286232	0		0	undetermined
Q2TAL8	Glutamine-rich protein 1 OS=Homo sapiens OX=9606 GN=QRICH1 PE=1 SV=1	QRICH1	0.0156891	0.0503574	-0.0545651	-0.863794	-0.558012	0.364762	0.383807	0		0	undetermined
P12236	ADP/ATP translocase 3 OS=Homo sapiens OX=9606 GN=SLC25A6 PE=1 SV=4	SLC25A6	-0.0488176	0.0736387	-0.0207114	-0.862956	-0.557413	0.179192	0.780258	0		0	undetermined
Q93008	Probable ubiquitin carboxyl-terminal hydrolase FAF-X OS=Homo sapiens OX=9606 GN=USP9X PE=1 SV=3	USP9X	-0.073651	0.0799481	-0.00656873	-0.860708	-0.555894	0.143836	0.974708	0		0	undetermined
Q6ZS17	Rho family-interacting cell polarization regulator 1 OS=Homo sapiens OX=9606 GN=RIPOR1 PE=1 SV=1	RIPOR1	-0.0792048	0.0811617	-0.00370328	-0.859833	-0.555894	0.137695	0.985322	0		0	undetermined
Q9HDC9	Adipocyte plasma membrane-associated protein OS=Homo sapiens OX=9606 GN=APMAP PE=1 SV=2	APMAP	0.0274039	-0.0311617	0.0590066	-0.859805	-0.555894	0.53293	0.264913	0		0	undetermined
Q15291	Retinoblastoma-binding protein 5 OS=Homo sapiens OX=9606 GN=RBBP5 PE=1 SV=2	RBBP5	-0.0256961	0.0487524	-0.0558551	-0.858956	-0.555894	0.380917	0.371612	0		0	undetermined
O75874	Isocitrate dehydrogenase [NADP] cytoplasmic OS=Homo sapiens OX=9606 GN=IDH1 PE=1 SV=2	IDH1	-0.0465715	0.0738058	-0.0198297	-0.858787	-0.555894	0.178179	0.792113	0		0	undetermined
Q99700	Ataxin-2 OS=Homo sapiens OX=9606 GN=ATXN2 PE=1 SV=2	ATXN2	-0.0460743	-0.0616686	0.0242424	-0.857538	-0.55535	0.231673	0.612144	0		0	undetermined
O94903	Pyridoxal phosphate homeostasis protein OS=Homo sapiens OX=9606 GN=PLPBP PE=1 SV=1	PLPBP	-0.0181572	-0.0683481	0.012677	-0.857113	-0.55535	0.186363	0.760518	0		0	undetermined
Q53GQ0	Very-long-chain 3-oxoacyl-CoA reductase OS=Homo sapiens OX=9606 GN=HSD17B12 PE=1 SV=2	HSD17B12	0.0185046	0.0583148	-0.044402	-0.857038	-0.55535	0.291121	0.488181	0		0	undetermined
Q32P44	Echinoderm microtubule-associated protein-like 3 OS=Homo sapiens OX=9606 GN=EML3 PE=1 SV=1	EML3	0.0147707	0.0529439	-0.0509758	-0.856584	-0.55535	0.339644	0.419007	0		0	undetermined
P33316	Deoxyuridine 5'-triphosphate nucleotidohydrolase, mitochondrial OS=Homo sapiens OX=9606 GN=DUT PE=1 SV=4	DUT	-0.0634712	-0.0387579	0.0520186	-0.856451	-0.55535	0.443619	0.32087	0		0	undetermined
Q9NVE7	4'-phosphopantetheine phosphatase OS=Homo sapiens OX=9606 GN=PANK4 PE=1 SV=1	PANK4	0.052773	0.065286	-0.0344027	-0.856253	-0.55535	0.235428	0.6042	0		0	undetermined
O95816	BAG family molecular chaperone regulator 2 OS=Homo sapiens OX=9606 GN=BAG2 PE=1 SV=1	BAG2	0.00491519	-0.0330487	0.0569266	-0.853678	-0.553827	0.509927	0.280816	0		0	undetermined
O15511	Actin-related protein 2/3 complex subunit 5 OS=Homo sapiens OX=9606 GN=ARPC5 PE=1 SV=3	ARPC5	0.0437297	-0.0660357	0.0164259	-0.853136	-0.553522	0.201243	0.711123	0		0	undetermined
P19105	Myosin regulatory light chain 12A OS=Homo sapiens OX=9606 GN=MYL12A PE=1 SV=2	MYL12A	-0.0106345	-0.026679	0.0619686	-0.852528	-0.553384	0.589603	0.243354	0		0	undetermined
Q9ULH1	Arf-GAP with SH3 domain, ANK repeat and PH domain-containing protein 1 OS=Homo sapiens OX=9606 GN=ASAP1 PE=1 SV=4	ASAP1	-0.0430701	0.0638968	-0.0359767	-0.851356	-0.552448	0.245877	0.585141	0		0	undetermined
P35579	Myosin-9 OS=Homo sapiens OX=9606 GN=MYH9 PE=1 SV=4	MYH9	0.0761235	-0.0219095	0.0652796	-0.850385	-0.552135	0.65278	0.22075	0		0	undetermined
P52597	Heterogeneous nuclear ribonucleoprotein F OS=Homo sapiens OX=9606 GN=HNRNPF PE=1 SV=3	HNRNPF	0.0958282	-0.0259653	0.0623359	-0.850338	-0.552135	0.598876	0.240769	0		0	undetermined
Q9BUJ2	Heterogeneous nuclear ribonucleoprotein U-like protein 1 OS=Homo sapiens OX=9606 GN=HNRNPUL1 PE=1 SV=2	HNRNPUL1	-0.00699617	-0.0653982	0.0171464	-0.849841	-0.552087	0.205494	0.701761	0		0	undetermined
Q9HCS7	Pre-mRNA-splicing factor SYF1 OS=Homo sapiens OX=9606 GN=XAB2 PE=1 SV=2	XAB2	-0.0299155	0.0417436	-0.0619942	-0.849343	-0.552077	0.456469	0.316925	0		0	undetermined
P51571	Translocon-associated protein subunit delta OS=Homo sapiens OX=9606 GN=SSR4 PE=1 SV=1	SSR4	0.0190388	-0.0499231	0.0390367	-0.844933	-0.549182	0.329246	0.443861	0		0	undetermined
P22694	cAMP-dependent protein kinase catalytic subunit beta OS=Homo sapiens OX=9606 GN=PRKACB PE=1 SV=2	PRKACB	-0.0609201	0.0771911	-0.0106676	-0.844811	-0.549182	0.158565	0.917667	0		0	undetermined
O15235	28S ribosomal protein S12, mitochondrial OS=Homo sapiens OX=9606 GN=MRPS12 PE=1 SV=1	MRPS12	0.0206275	0.0189493	-0.0789452	-0.843656	-0.548494	0.751325	0.19457	0		0	undetermined
Q9UNI6	Dual specificity protein phosphatase 12 OS=Homo sapiens OX=9606 GN=DUSP12 PE=1 SV=1	DUSP12	0.0393975	0.0385754	-0.064319	-0.842814	-0.54835	0.493208	0.297669	0		0	undetermined
Q14318	Peptidyl-prolyl cis-trans isomerase FKBP8 OS=Homo sapiens OX=9606 GN=FKBP8 PE=1 SV=2	FKBP8	0.0587169	-0.031853	0.0569051	-0.841098	-0.547332	0.524442	0.280984	0		0	undetermined
O95630	STAM-binding protein OS=Homo sapiens OX=9606 GN=STAMBP PE=1 SV=1	STAMBP	-0.0495213	-0.0650318	0.0164934	-0.839332	-0.54603	0.207966	0.710244	0		0	undetermined
Q6Y7W6	GRB10-interacting GYF protein 2 OS=Homo sapiens OX=9606 GN=GIGYF2 PE=1 SV=1	GIGYF2	0.014207	-0.0274235	0.0601792	-0.837213	-0.544144	0.580001	0.256226	0		0	undetermined
P34059	N-acetylgalactosamine-6-sulfatase OS=Homo sapiens OX=9606 GN=GALNS PE=1 SV=1	GALNS	-0.01995	0.0601121	-0.0397121	-0.835258	-0.542652	0.27598	0.541065	0		0	undetermined
Q14683	Structural maintenance of chromosomes protein 1A OS=Homo sapiens OX=9606 GN=SMC1A PE=1 SV=2	SMC1A	0.0319125	-0.058029	0.0271677	-0.834276	-0.541901	0.259422	0.576733	0		0	undetermined
Q96T51	RUN and FYVE domain-containing protein 1 OS=Homo sapiens OX=9606 GN=RUFY1 PE=1 SV=2	RUFY1	-0.0837809	0.0688281	-0.0258784	-0.833615	-0.541704	0.210218	0.711884	0		0	undetermined
O60610	Protein diaphanous homolog 1 OS=Homo sapiens OX=9606 GN=DIAPH1 PE=1 SV=2	DIAPH1	-0.0763567	-0.0187775	0.066081	-0.832865	-0.541337	0.695704	0.215513	0		0	undetermined
Q9UKS6	Protein kinase C and casein kinase substrate in neurons protein 3 OS=Homo sapiens OX=9606 GN=PACSIN3 PE=1 SV=2	PACSIN3	0.0594926	-0.0705459	0.00495228	-0.832786	-0.541337	0.17299	0.865218	0		0	undetermined
O00764	Pyridoxal kinase OS=Homo sapiens OX=9606 GN=PDXK PE=1 SV=1	PDXK	-0.0347631	-0.0348459	0.0535451	-0.832043	-0.540826	0.48851	0.308031	0		0	undetermined
Q8N6T3	ADP-ribosylation factor GTPase-activating protein 1 OS=Homo sapiens OX=9606 GN=ARFGAP1 PE=1 SV=2	ARFGAP1	-0.0525581	-0.0494729	0.0382399	-0.83122	-0.540234	0.333452	0.452197	0		0	undetermined
O95433	Activator of 90 kDa heat shock protein ATPase homolog 1 OS=Homo sapiens OX=9606 GN=AHSA1 PE=1 SV=1	AHSA1	-0.00432226	0.0249789	-0.0739959	-0.830475	-0.539961	0.66716	0.226032	0		0	undetermined
Q7Z422	SUZ domain-containing protein 1 OS=Homo sapiens OX=9606 GN=SZRD1 PE=1 SV=1	SZRD1	0.0263536	0.0219815	-0.0760059	-0.830258	-0.539961	0.708555	0.212843	0		0	undetermined
Q16531	DNA damage-binding protein 1 OS=Homo sapiens OX=9606 GN=DDB1 PE=1 SV=1	DDB1	-0.0274219	0.0709627	-0.0214443	-0.829395	-0.539676	0.196002	0.770441	0		0	undetermined
Q96DE0	U8 snoRNA-decapping enzyme OS=Homo sapiens OX=9606 GN=NUDT16 PE=1 SV=2	NUDT16	0.0325471	0.0738902	-0.0155156	-0.828565	-0.539238	0.177669	0.850769	0		0	undetermined
Q15434	RNA-binding motif, single-stranded-interacting protein 2 OS=Homo sapiens OX=9606 GN=RBMS2 PE=1 SV=1	RBMS2	-0.037923	-0.0358966	0.0521811	-0.827246	-0.538562	0.476218	0.319487	0		0	undetermined
Q8NBX0	Saccharopine dehydrogenase-like oxidoreductase OS=Homo sapiens OX=9606 GN=SCCPDH PE=1 SV=1	SCCPDH	0.00839067	0.0483415	-0.0532909	-0.826202	-0.538092	0.385123	0.396091	0		0	undetermined
P52948	Nuclear pore complex protein Nup98-Nup96 OS=Homo sapiens OX=9606 GN=NUP98 PE=1 SV=4	NUP98	0.00309681	0.0762834	-0.00992317	-0.826087	-0.538092	0.163656	0.928005	0		0	undetermined
Q96HS1	Serine/threonine-protein phosphatase PGAM5, mitochondrial OS=Homo sapiens OX=9606 GN=PGAM5 PE=1 SV=2	PGAM5	-0.0823896	-0.0620871	0.0198192	-0.825321	-0.537783	0.228622	0.66743	0		0	undetermined
Q9Y619	Mitochondrial ornithine transporter 1 OS=Homo sapiens OX=9606 GN=SLC25A15 PE=1 SV=1	SLC25A15	0.035362	0.0169073	-0.078729	-0.823929	-0.537256	0.780575	0.195873	0		0	undetermined
Q96D46	60S ribosomal export protein NMD3 OS=Homo sapiens OX=9606 GN=NMD3 PE=1 SV=1	NMD3	-0.0569698	0.0419315	-0.0592337	-0.819571	-0.534774	0.45434	0.340828	0		0	undetermined
Q9H4A4	Aminopeptidase B OS=Homo sapiens OX=9606 GN=RNPEP PE=1 SV=2	RNPEP	0.00581621	0.0562272	-0.043214	-0.818761	-0.534202	0.309398	0.501308	0		0	undetermined
Q9H074	Polyadenylate-binding protein-interacting protein 1 OS=Homo sapiens OX=9606 GN=PAIP1 PE=1 SV=1	PAIP1	-0.0367783	0.00957405	-0.082342	-0.816537	-0.533174	0.887911	0.174918	0		0	undetermined
Q9NQC3	Reticulon-4 OS=Homo sapiens OX=9606 GN=RTN4 PE=1 SV=2	RTN4	0.0986683	-0.00663951	0.0720998	-0.815282	-0.532529	0.870257	0.179018	0		0	undetermined
Q14789	Golgin subfamily B member 1 OS=Homo sapiens OX=9606 GN=GOLGB1 PE=1 SV=2	GOLGB1	-0.0897302	0.0598505	-0.0378902	-0.814891	-0.532365	0.27815	0.562355	0		0	undetermined
P01112	GTPase HRas OS=Homo sapiens OX=9606 GN=HRAS PE=1 SV=1	HRAS	-0.0373567	0.0212332	-0.0752526	-0.81391	-0.532241	0.719031	0.21772	0		0	undetermined
Q9BXS6	Nucleolar and spindle-associated protein 1 OS=Homo sapiens OX=9606 GN=NUSAP1 PE=1 SV=1	NUSAP1	0.0791676	0.0460836	-0.0545586	-0.813863	-0.532241	0.408736	0.383869	0		0	undetermined
Q13162	Peroxiredoxin-4 OS=Homo sapiens OX=9606 GN=PRDX4 PE=1 SV=1	PRDX4	0.0129538	-0.0521449	0.0329825	-0.81234	-0.531169	0.308996	0.509361	0		0	undetermined
Q9Y613	FH1/FH2 domain-containing protein 1 OS=Homo sapiens OX=9606 GN=FHOD1 PE=1 SV=3	FHOD1	0.0233373	-0.00788352	0.0711689	-0.811888	-0.530943	0.851913	0.184341	0		0	undetermined
O60783	28S ribosomal protein S14, mitochondrial OS=Homo sapiens OX=9606 GN=MRPS14 PE=1 SV=1	MRPS14	-0.0246543	-0.0572205	0.0257296	-0.810546	-0.530052	0.265887	0.59402	0		0	undetermined
Q96GG9	DCN1-like protein 1 OS=Homo sapiens OX=9606 GN=DCUN1D1 PE=1 SV=1	DCUN1D1	-0.0310814	0.0340923	-0.0653825	-0.809492	-0.529223	0.547786	0.289127	0		0	undetermined
O00165	HCLS1-associated protein X-1 OS=Homo sapiens OX=9606 GN=HAX1 PE=1 SV=2	HAX1	0.0609657	-0.0476847	0.0381611	-0.808596	-0.528937	0.350497	0.453027	0		0	undetermined
Q92734	Protein TFG OS=Homo sapiens OX=9606 GN=TFG PE=1 SV=2	TFG	0.0844545	-0.0650592	0.012477	-0.808087	-0.528937	0.20778	0.763184	0		0	undetermined
P46109	Crk-like protein OS=Homo sapiens OX=9606 GN=CRKL PE=1 SV=1	CRKL	0.0678657	0.0761412	-0.0074794	-0.808057	-0.528937	0.164465	0.962013	0		0	undetermined
Q96IK1	Biorientation of chromosomes in cell division protein 1 OS=Homo sapiens OX=9606 GN=BOD1 PE=1 SV=2	BOD1	-0.0786836	0.0718087	-0.016894	-0.807856	-0.528937	0.190567	0.831921	0		0	undetermined
Q96M27	Protein PRRC1 OS=Homo sapiens OX=9606 GN=PRRC1 PE=1 SV=1	PRRC1	0.060156	-0.0630519	0.015882	-0.806496	-0.528445	0.221699	0.71822	0		0	undetermined
Q9Y3I1	F-box only protein 7 OS=Homo sapiens OX=9606 GN=FBXO7 PE=1 SV=1	FBXO7	-0.047422	0.0694092	-0.0213109	-0.806076	-0.528445	0.206276	0.772226	0		0	undetermined
Q96CT7	Coiled-coil domain-containing protein 124 OS=Homo sapiens OX=9606 GN=CCDC124 PE=1 SV=1	CCDC124	-0.0332503	-0.0512656	0.0334719	-0.806019	-0.528445	0.31691	0.503884	0		0	undetermined
Q9NTX5	Ethylmalonyl-CoA decarboxylase OS=Homo sapiens OX=9606 GN=ECHDC1 PE=1 SV=2	ECHDC1	-0.00655709	0.0777361	-0.00404525	-0.804996	-0.528093	0.155566	0.990092	0		0	undetermined
Q99538	Legumain OS=Homo sapiens OX=9606 GN=LGMN PE=1 SV=1	LGMN	0.0115075	0.0635251	-0.0311758	-0.804128	-0.527672	0.248728	0.644117	0		0	undetermined
Q15025	TNFAIP3-interacting protein 1 OS=Homo sapiens OX=9606 GN=TNIP1 PE=1 SV=2	TNIP1	-0.126111	-0.0696979	0.00248116	-0.803142	-0.527318	0.178062	0.899313	0		0	undetermined
Q9UBQ5	Eukaryotic translation initiation factor 3 subunit K OS=Homo sapiens OX=9606 GN=EIF3K PE=1 SV=1	EIF3K	0.0700441	0.0370718	-0.0622498	-0.802676	-0.527318	0.511183	0.314769	0		0	undetermined
Q9Y5N6	Origin recognition complex subunit 6 OS=Homo sapiens OX=9606 GN=ORC6 PE=1 SV=1	ORC6	0.00129741	-0.0310609	0.0543756	-0.802659	-0.527318	0.534174	0.301191	0		0	undetermined
P67775	Serine/threonine-protein phosphatase 2A catalytic subunit alpha isoform OS=Homo sapiens OX=9606 GN=PPP2CA PE=1 SV=1	PPP2CA	-0.0150675	0.0653883	-0.0278709	-0.80179	-0.526671	0.234671	0.686092	0		0	undetermined
O95777	U6 snRNA-associated Sm-like protein LSm8 OS=Homo sapiens OX=9606 GN=LSM8 PE=1 SV=3	LSM8	0.0491006	0.0261137	-0.0707661	-0.799481	-0.525735	0.651739	0.24843	0		0	undetermined
Q16740	ATP-dependent Clp protease proteolytic subunit, mitochondrial OS=Homo sapiens OX=9606 GN=CLPP PE=1 SV=1	CLPP	-0.0673747	-0.00924367	0.0694208	-0.798591	-0.52525	0.831948	0.194651	0		0	undetermined
P40429	60S ribosomal protein L13a OS=Homo sapiens OX=9606 GN=RPL13A PE=1 SV=2	RPL13A	0.0938097	-0.0670642	0.00728906	-0.798217	-0.525098	0.194521	0.833204	0		0	undetermined
P32969	60S ribosomal protein L9 OS=Homo sapiens OX=9606 GN=RPL9 PE=1 SV=1	RPL9	0.0858403	-0.0339471	0.0514124	-0.797694	-0.524796	0.499159	0.326064	0		0	undetermined
[truncated: 1,677 more rows]

## Sheet: oligomycin
Protein.accession	Protein.description	Gene.name	olig_37	olig_45	olig_51	log10_Multiv_Norm_pval	Adjusted.BH_log10_Multiv_Norm_pval	pval_temp_1	pval_temp_2	pval_count	var_warning	sum_of_signs	prediction
P30086	Phosphatidylethanolamine-binding protein 1 OS=Homo sapiens OX=9606 GN=PEBP1 PE=1 SV=3	PEBP1	-0.296178	0.307909	0.549184	-21.1221	-17.5567	7.55196e-05	0	2	Warning: high variance	2	stabilized
O75531	Barrier-to-autointegration factor OS=Homo sapiens OX=9606 GN=BANF1 PE=1 SV=1	BANF1	-0.118416	0.35272	0.443635	-16.6905	-13.4261	4.85796e-06	6.22502e-12	2		2	stabilized
Q9C005	Protein dpy-30 homolog OS=Homo sapiens OX=9606 GN=DPY30 PE=1 SV=1	DPY30	-0.0748401	0.182728	0.435334	-12.5128	-9.42454	0.0246556	1.53459e-11	2	Warning: high variance	2	stabilized
Q9BXV9	EKC/KEOPS complex subunit GON7 OS=Homo sapiens OX=9606 GN=GON7 PE=1 SV=2	GON7	0.0477547	0.256249	0.339374	-9.84172	-6.97531	0.00114628	1.57204e-07	2		2	stabilized
Q9P1F3	Costars family protein ABRACL OS=Homo sapiens OX=9606 GN=ABRACL PE=1 SV=1	ABRACL	-0.0672377	0.253279	0.320697	-9.10405	-6.31682	0.0013213	7.35134e-07	2		2	stabilized
P13693	Translationally-controlled tumor protein OS=Homo sapiens OX=9606 GN=TPT1 PE=1 SV=1	TPT1	-0.0851124	0.19804	0.336212	-8.61635	-5.89607	0.0140456	2.053e-07	2		2	stabilized
P09132	Signal recognition particle 19 kDa protein OS=Homo sapiens OX=9606 GN=SRP19 PE=1 SV=3	SRP19	-0.0661756	0.182919	0.298757	-7.06712	-4.50646	0.0244887	4.0514e-06	2		2	stabilized
P05387	60S acidic ribosomal protein P2 OS=Homo sapiens OX=9606 GN=RPLP2 PE=1 SV=1	RPLP2	-0.109594	0.202073	0.279606	-6.77079	-4.31936	0.0120307	1.63816e-05	2		2	stabilized
P61457	Pterin-4-alpha-carbinolamine dehydratase OS=Homo sapiens OX=9606 GN=PCBD1 PE=1 SV=2	PCBD1	-0.0527321	0.2209	0.263114	-6.60969	-4.19045	0.00562916	5.09253e-05	2		2	stabilized
P62937	Peptidyl-prolyl cis-trans isomerase A OS=Homo sapiens OX=9606 GN=PPIA PE=1 SV=2	PPIA	-0.0390703	0.168252	0.276071	-6.12563	-3.79071	0.0404765	2.10021e-05	2		2	stabilized
Q07021	Complement component 1 Q subcomponent-binding protein, mitochondrial OS=Homo sapiens OX=9606 GN=C1QBP PE=1 SV=1	C1QBP	-0.0563953	0.231095	0.228258	-5.84318	-3.53308	0.00363723	0.00045448	2		2	stabilized
Q13572	Inositol-tetrakisphosphate 1-kinase OS=Homo sapiens OX=9606 GN=ITPK1 PE=1 SV=2	ITPK1	0.0752127	0.291808	0.147425	-5.38733	-3.18368	0.000185436	0.0249519	2		2	stabilized
Q9BRT2	Ubiquinol-cytochrome-c reductase complex assembly factor 2 OS=Homo sapiens OX=9606 GN=UQCC2 PE=1 SV=1	UQCC2	-0.105878	0.229714	0.206765	-5.28618	-3.15434	0.00386306	0.00152371	2		2	stabilized
Q9ULX6	A-kinase anchor protein 8-like OS=Homo sapiens OX=9606 GN=AKAP8L PE=1 SV=4	AKAP8L	-0.0020625	0.167962	0.247136	-5.28049	-3.15434	0.0408666	0.000143846	2		2	stabilized
Q9H9H4	Vacuolar protein sorting-associated protein 37B OS=Homo sapiens OX=9606 GN=VPS37B PE=1 SV=1	VPS37B	-0.0658264	0.162721	0.239847	-5.00663	-2.96576	0.0484691	0.00022649	2		2	stabilized
Q5EBL8	PDZ domain-containing protein 11 OS=Homo sapiens OX=9606 GN=PDZD11 PE=1 SV=2	PDZD11	0.0227068	0.164565	0.238605	-4.99966	-2.96576	0.0456684	0.000244403	2		2	stabilized
Q86SX6	Glutaredoxin-related protein 5, mitochondrial OS=Homo sapiens OX=9606 GN=GLRX5 PE=1 SV=2	GLRX5	-0.0577915	0.173935	0.224798	-4.77739	-2.84548	0.0334576	0.000556178	2		2	stabilized
Q15121	Astrocytic phosphoprotein PEA-15 OS=Homo sapiens OX=9606 GN=PEA15 PE=1 SV=2	PEA15	-0.0966033	0.171518	0.215815	-4.51763	-2.65123	0.0363038	0.000927483	2		2	stabilized
P06703	Protein S100-A6 OS=Homo sapiens OX=9606 GN=S100A6 PE=1 SV=1	S100A6	-0.026626	0.24017	0.157986	-4.45501	-2.61147	0.00242871	0.016071	2		2	stabilized
P09486	SPARC OS=Homo sapiens OX=9606 GN=SPARC PE=1 SV=1	SPARC	-0.0543619	0.232152	0.160615	-4.34815	-2.53865	0.00347263	0.0143486	2		2	stabilized
Q9BTT4	Mediator of RNA polymerase II transcription subunit 10 OS=Homo sapiens OX=9606 GN=MED10 PE=1 SV=1	MED10	0.0132366	0.229693	0.152468	-4.14876	-2.39629	0.00386658	0.0202868	2		2	stabilized
Q7L3T8	Probable proline--tRNA ligase, mitochondrial OS=Homo sapiens OX=9606 GN=PARS2 PE=1 SV=1	PARS2	0.127509	0.190732	0.184874	-4.10581	-2.35998	0.0184636	0.00468722	2		2	stabilized
Q4G0N4	NAD kinase 2, mitochondrial OS=Homo sapiens OX=9606 GN=NADK2 PE=1 SV=2	NADK2	0.13867	0.206232	0.161746	-3.89611	-2.18807	0.0102256	0.0136593	2		2	stabilized
Q9BYV8	Centrosomal protein of 41 kDa OS=Homo sapiens OX=9606 GN=CEP41 PE=1 SV=1	CEP41	0.10784	0.187971	0.175737	-3.8699	-2.16951	0.0204251	0.00725519	2		2	stabilized
Q96EY5	Multivesicular body subunit 12A OS=Homo sapiens OX=9606 GN=MVB12A PE=1 SV=1	MVB12A	0.124093	0.169812	0.182705	-3.73713	-2.08024	0.0384351	0.00520814	2		2	stabilized
O43598	2'-deoxynucleoside 5'-phosphate N-hydrolase 1 OS=Homo sapiens OX=9606 GN=DNPH1 PE=1 SV=1	DNPH1	-0.0294985	0.191347	0.153374	-3.4897	-1.93716	0.0180495	0.0195338	2		2	stabilized
Q9NWS0	PIH1 domain-containing protein 1 OS=Homo sapiens OX=9606 GN=PIH1D1 PE=1 SV=1	PIH1D1	-0.00271357	0.184995	0.15492	-3.41675	-1.89786	0.0227412	0.0183065	2		2	stabilized
Q9BW19	Kinesin-like protein KIFC1 OS=Homo sapiens OX=9606 GN=KIFC1 PE=1 SV=2	KIFC1	0.0497728	0.171327	0.162533	-3.352	-1.86905	0.0365377	0.013197	2		2	stabilized
Q9UK73	Protein fem-1 homolog B OS=Homo sapiens OX=9606 GN=FEM1B PE=1 SV=1	FEM1B	-0.0623063	0.207409	0.129738	-3.35199	-1.86905	0.00976072	0.0493514	2		2	stabilized
Q86W42	THO complex subunit 6 homolog OS=Homo sapiens OX=9606 GN=THOC6 PE=1 SV=1	THOC6	0.0613705	0.199291	0.130733	-3.22953	-1.78473	0.0133908	0.0475793	2		2	stabilized
Q5HYK3	2-methoxy-6-polyprenyl-1,4-benzoquinol methylase, mitochondrial OS=Homo sapiens OX=9606 GN=COQ5 PE=1 SV=2	COQ5	-0.0100393	0.183371	0.144533	-3.2044	-1.77256	0.0240987	0.0280259	2		2	stabilized
Q13277	Syntaxin-3 OS=Homo sapiens OX=9606 GN=STX3 PE=1 SV=3	STX3	-0.061703	0.180073	0.146756	-3.19244	-1.77086	0.0270731	0.0256364	2		2	stabilized
Q9NQ50	39S ribosomal protein L40, mitochondrial OS=Homo sapiens OX=9606 GN=MRPL40 PE=1 SV=1	MRPL40	-0.19259	0.178952	0.146078	-3.1633	-1.74714	0.0281533	0.0263452	2		2	stabilized
P25787	Proteasome subunit alpha type-2 OS=Homo sapiens OX=9606 GN=PSMA2 PE=1 SV=2	PSMA2	0.0125867	0.171108	0.152332	-3.15776	-1.74468	0.0368074	0.0204019	2		2	stabilized
P48382	DNA-binding protein RFX5 OS=Homo sapiens OX=9606 GN=RFX5 PE=1 SV=1	RFX5	0.0791659	0.166316	0.151987	-3.08178	-1.70245	0.0431369	0.0206959	2		2	stabilized
Q92882	Osteoclast-stimulating factor 1 OS=Homo sapiens OX=9606 GN=OSTF1 PE=1 SV=2	OSTF1	-0.127425	0.176718	0.143272	-3.0802	-1.70245	0.0304186	0.0294661	2		2	stabilized
Q8IWB1	Inositol 1,4,5-trisphosphate receptor-interacting protein OS=Homo sapiens OX=9606 GN=ITPRIP PE=1 SV=1	ITPRIP	0.0706703	0.16522	0.147551	-2.98631	-1.63842	0.0447071	0.0248251	2		2	stabilized
P62699	Protein yippee-like 5 OS=Homo sapiens OX=9606 GN=YPEL5 PE=1 SV=1	YPEL5	0.0197635	0.169838	0.13411	-2.82279	-1.53157	0.0384026	0.0419599	2		2	stabilized
P61604	10 kDa heat shock protein, mitochondrial OS=Homo sapiens OX=9606 GN=HSPE1 PE=1 SV=2	HSPE1	-0.214269	0.0380155	0.346648	-7.20417	-4.59303	0.788467	8.42973e-08	1	Warning: high variance	2	stabilized
C9JLW8	Mapk-regulated corepressor-interacting protein 1 OS=Homo sapiens OX=9606 GN=MCRIP1 PE=1 SV=1	MCRIP1	-0.0977281	0.137878	0.316486	-7.03045	-4.50646	0.102346	1.02911e-06	1		2	stabilized
Q04837	Single-stranded DNA-binding protein, mitochondrial OS=Homo sapiens OX=9606 GN=SSBP1 PE=1 SV=1	SSBP1	-0.105203	0.046513	0.323046	-6.39773	-4.01609	0.700626	6.08267e-07	1	Warning: high variance	2	stabilized
P42766	60S ribosomal protein L35 OS=Homo sapiens OX=9606 GN=RPL35 PE=1 SV=2	RPL35	0.0164187	0.0544587	0.320932	-6.37735	-4.01609	0.621937	7.21352e-07	1	Warning: high variance	2	stabilized
P60660	Myosin light polypeptide 6 OS=Homo sapiens OX=9606 GN=MYL6 PE=1 SV=2	MYL6	-0.131259	0.05647	0.300199	-5.68758	-3.40096	0.602642	3.63409e-06	1	Warning: high variance	2	stabilized
O75368	SH3 domain-binding glutamic acid-rich-like protein OS=Homo sapiens OX=9606 GN=SH3BGRL PE=1 SV=1	SH3BGRL	-0.0831516	0.137544	0.26742	-5.45017	-3.22721	0.103308	3.81068e-05	1		2	stabilized
Q9BW83	Intraflagellar transport protein 27 homolog OS=Homo sapiens OX=9606 GN=IFT27 PE=1 SV=1	IFT27	0.0466704	0.120387	0.267763	-5.25732	-3.15434	0.163182	3.72298e-05	1		2	stabilized
P47712	Cytosolic phospholipase A2 OS=Homo sapiens OX=9606 GN=PLA2G4A PE=1 SV=2	PLA2G4A	-0.0299511	0.345163	0.0043068	-5.12154	-3.04753	7.91308e-06	0.996807	1	Warning: high variance	2	stabilized
Q13011	Delta(3,5)-Delta(2,4)-dienoyl-CoA isomerase, mitochondrial OS=Homo sapiens OX=9606 GN=ECH1 PE=1 SV=2	ECH1	0.0384246	0.0273973	0.282934	-4.95316	-2.94409	0.902003	1.29297e-05	1	Warning: high variance	2	stabilized
P14927	Cytochrome b-c1 complex subunit 7 OS=Homo sapiens OX=9606 GN=UQCRB PE=1 SV=2	UQCRB	-0.0762266	0.0761136	0.27147	-4.93594	-2.94026	0.430016	2.88944e-05	1		2	stabilized
Q76L83	Putative Polycomb group protein ASXL2 OS=Homo sapiens OX=9606 GN=ASXL2 PE=1 SV=1	ASXL2	0.176154	0.147463	0.244141	-4.91457	-2.94026	0.0776265	0.000173603	1		2	stabilized
P49721	Proteasome subunit beta type-2 OS=Homo sapiens OX=9606 GN=PSMB2 PE=1 SV=1	PSMB2	-0.0190849	0.113188	0.255355	-4.81828	-2.86569	0.194965	8.49495e-05	1		2	stabilized
P62917	60S ribosomal protein L8 OS=Homo sapiens OX=9606 GN=RPL8 PE=1 SV=2	RPL8	-0.00189245	0.0856033	0.251983	-4.45257	-2.61147	0.358145	0.000105637	1		2	stabilized
P62826	GTP-binding nuclear protein Ran OS=Homo sapiens OX=9606 GN=RAN PE=1 SV=3	RAN	0.104105	0.13567	0.229559	-4.37803	-2.54693	0.108848	0.000420941	1		2	stabilized
Q9Y3U8	60S ribosomal protein L36 OS=Homo sapiens OX=9606 GN=RPL36 PE=1 SV=3	RPL36	-0.0765922	0.110521	0.238781	-4.33349	-2.53154	0.207825	0.000241779	1		2	stabilized
P04424	Argininosuccinate lyase OS=Homo sapiens OX=9606 GN=ASL PE=1 SV=4	ASL	-0.0338582	0.264139	0.120536	-4.31313	-2.51875	0.000780022	0.0685094	1		2	stabilized
P50452	Serpin B8 OS=Homo sapiens OX=9606 GN=SERPINB8 PE=1 SV=2	SERPINB8	0.0442821	0.260056	0.116353	-4.16224	-2.40024	0.000953265	0.0790496	1		2	stabilized
Q9Y237	Peptidyl-prolyl cis-trans isomerase NIMA-interacting 4 OS=Homo sapiens OX=9606 GN=PIN4 PE=1 SV=1	PIN4	-0.141442	0.0978692	0.23705	-4.15943	-2.40024	0.277214	0.000268712	1		2	stabilized
Q16626	Male-enhanced antigen 1 OS=Homo sapiens OX=9606 GN=MEA1 PE=1 SV=2	MEA1	0.0562124	0.0854445	0.238304	-4.07741	-2.33811	0.359282	0.000248935	1		2	stabilized
P61758	Prefoldin subunit 3 OS=Homo sapiens OX=9606 GN=VBP1 PE=1 SV=4	VBP1	-0.174164	0.0245749	0.248104	-3.91623	-2.19595	0.932623	0.000135304	1	Warning: high variance	2	stabilized
P15407	Fos-related antigen 1 OS=Homo sapiens OX=9606 GN=FOSL1 PE=1 SV=1	FOSL1	-0.0181028	0.0266662	0.243357	-3.79758	-2.11535	0.909922	0.000182292	1	Warning: high variance	2	stabilized
O14907	Tax1-binding protein 3 OS=Homo sapiens OX=9606 GN=TAX1BP3 PE=1 SV=2	TAX1BP3	-0.03276	0.0853829	0.227471	-3.79423	-2.11535	0.359723	0.000475945	1		2	stabilized
P35610	Sterol O-acyltransferase 1 OS=Homo sapiens OX=9606 GN=SOAT1 PE=1 SV=3	SOAT1	0.186283	0.153859	0.194645	-3.77223	-2.09895	0.0640147	0.00287699	1		2	stabilized
O75362	Zinc finger protein 217 OS=Homo sapiens OX=9606 GN=ZNF217 PE=1 SV=1	ZNF217	0.077418	0.0717733	0.228631	-3.70915	-2.06806	0.465496	0.000444624	1		2	stabilized
Q99643	Succinate dehydrogenase cytochrome b560 subunit, mitochondrial OS=Homo sapiens OX=9606 GN=SDHC PE=1 SV=1	SDHC	0.0545251	0.243942	0.104215	-3.6545	-2.03787	0.00204476	0.117254	1		2	stabilized
Q9H0E2	Toll-interacting protein OS=Homo sapiens OX=9606 GN=TOLLIP PE=1 SV=1	TOLLIP	-0.0600647	0.275861	0.0429825	-3.65386	-2.03787	0.000431471	0.542638	1	Warning: high variance	2	stabilized
P13984	General transcription factor IIF subunit 2 OS=Homo sapiens OX=9606 GN=GTF2F2 PE=1 SV=2	GTF2F2	-0.0593011	0.044051	0.233347	-3.63283	-2.02408	0.725727	0.000336017	1		2	stabilized
P62834	Ras-related protein Rap-1A OS=Homo sapiens OX=9606 GN=RAP1A PE=1 SV=1	RAP1A	0.0115957	0.279588	0.0276407	-3.61655	-2.01496	0.000355631	0.712197	1	Warning: high variance	2	stabilized
P53671	LIM domain kinase 2 OS=Homo sapiens OX=9606 GN=LIMK2 PE=1 SV=1	LIMK2	0.0636071	0.230527	0.11736	-3.58081	-1.98857	0.00372866	0.0763993	1		2	stabilized
Q96EL3	39S ribosomal protein L53, mitochondrial OS=Homo sapiens OX=9606 GN=MRPL53 PE=1 SV=1	MRPL53	-0.0626057	0.00187225	0.233757	-3.55045	-1.96623	0.821328	0.00032784	1	Warning: high variance	2	stabilized
Q9Y4Z0	U6 snRNA-associated Sm-like protein LSm4 OS=Homo sapiens OX=9606 GN=LSM4 PE=1 SV=1	LSM4	0.059126	0.13503	0.195498	-3.54934	-1.96623	0.110791	0.00275415	1		2	stabilized
Q2M389	WASH complex subunit 4 OS=Homo sapiens OX=9606 GN=WASHC4 PE=1 SV=2	WASHC4	0.0440899	0.268655	0.0484619	-3.54185	-1.96325	0.00062272	0.487357	1	Warning: high variance	2	stabilized
P56537	Eukaryotic translation initiation factor 6 OS=Homo sapiens OX=9606 GN=EIF6 PE=1 SV=1	EIF6	0.0381399	0.0495384	0.227228	-3.51058	-1.94084	0.670226	0.00048277	1		2	stabilized
Q9Y3C0	WASH complex subunit 3 OS=Homo sapiens OX=9606 GN=WASHC3 PE=1 SV=1	WASHC3	-0.00353123	0.109412	0.205968	-3.49958	-1.93853	0.213348	0.00159036	1		2	stabilized
Q9HCN8	Stromal cell-derived factor 2-like protein 1 OS=Homo sapiens OX=9606 GN=SDF2L1 PE=1 SV=2	SDF2L1	-0.0780862	0.0426699	0.228219	-3.49162	-1.93716	0.739939	0.000455523	1		2	stabilized
Q8NCF5	NFATC2-interacting protein OS=Homo sapiens OX=9606 GN=NFATC2IP PE=1 SV=1	NFATC2IP	-0.104722	0.113071	0.2029	-3.46681	-1.93082	0.195514	0.00187291	1		2	stabilized
Q9P2N5	RNA-binding protein 27 OS=Homo sapiens OX=9606 GN=RBM27 PE=1 SV=2	RBM27	0.0265213	0.233101	0.102013	-3.4111	-1.89786	0.00333067	0.125531	1		2	stabilized
Q15528	Mediator of RNA polymerase II transcription subunit 22 OS=Homo sapiens OX=9606 GN=MED22 PE=1 SV=2	MED22	-0.0433541	0.218109	0.121347	-3.41005	-1.89786	0.00632428	0.0666053	1		2	stabilized
P03897	NADH-ubiquinone oxidoreductase chain 3 OS=Homo sapiens OX=9606 GN=MT-ND3 PE=1 SV=1	MT-ND3	0.107947	0.228799	0.103678	-3.35164	-1.86905	0.00401948	0.119232	1		2	stabilized
Q9NRL3	Striatin-4 OS=Homo sapiens OX=9606 GN=STRN4 PE=1 SV=2	STRN4	-0.0128629	0.208434	0.127534	-3.33453	-1.85551	0.00937127	0.053474	1		2	stabilized
O43301	Heat shock 70 kDa protein 12A OS=Homo sapiens OX=9606 GN=HSPA12A PE=1 SV=2	HSPA12A	0.0366607	0.221155	0.108268	-3.27297	-1.80796	0.00556918	0.103144	1		2	stabilized
Q9H0R4	Haloacid dehalogenase-like hydrolase domain-containing protein 2 OS=Homo sapiens OX=9606 GN=HDHD2 PE=1 SV=1	HDHD2	0.0393371	0.202994	0.128549	-3.25696	-1.80155	0.0116081	0.0515411	1		2	stabilized
Q9BQC6	Ribosomal protein 63, mitochondrial OS=Homo sapiens OX=9606 GN=MRPL57 PE=1 SV=1	MRPL57	0.0419047	0.0878658	0.203688	-3.23706	-1.78896	0.342195	0.00179619	1		2	stabilized
Q53T59	HCLS1-binding protein 3 OS=Homo sapiens OX=9606 GN=HS1BP3 PE=1 SV=1	HS1BP3	0.0571663	0.233081	0.0874674	-3.22284	-1.78457	0.00333363	0.192063	1		2	stabilized
P11166	Solute carrier family 2, facilitated glucose transporter member 1 OS=Homo sapiens OX=9606 GN=SLC2A1 PE=1 SV=2	SLC2A1	0.105435	0.247629	0.0585393	-3.1922	-1.77086	0.00172404	0.394152	1		2	stabilized
P62273	40S ribosomal protein S29 OS=Homo sapiens OX=9606 GN=RPS29 PE=1 SV=2	RPS29	0.0271965	0.026974	0.219854	-3.19011	-1.77086	0.906586	0.000738625	1		2	stabilized
Q8IXM2	Chromatin complexes subunit BAP18 OS=Homo sapiens OX=9606 GN=BAP18 PE=1 SV=1	BAP18	-0.0190559	0.0947034	0.196917	-3.14547	-1.73568	0.296801	0.00256031	1		2	stabilized
Q8NB37	Glutamine amidotransferase-like class 1 domain-containing protein 1 OS=Homo sapiens OX=9606 GN=GATD1 PE=1 SV=1	GATD1	0.0430779	0.14405	0.17101	-3.14269	-1.73568	0.0858029	0.00902857	1		2	stabilized
P48637	Glutathione synthetase OS=Homo sapiens OX=9606 GN=GSS PE=1 SV=1	GSS	-0.0592705	0.0908811	0.197422	-3.12121	-1.72315	0.321656	0.00249442	1		2	stabilized
Q8NBM4	Ubiquitin-associated domain-containing protein 2 OS=Homo sapiens OX=9606 GN=UBAC2 PE=1 SV=1	UBAC2	-0.00385369	0.217122	0.101031	-3.09961	-1.7089	0.00658793	0.129363	1		2	stabilized
P62256	Ubiquitin-conjugating enzyme E2 H OS=Homo sapiens OX=9606 GN=UBE2H PE=1 SV=1	UBE2H	0.0223129	0.0243123	0.216687	-3.09819	-1.7089	0.935478	0.000883244	1		2	stabilized
O15085	Rho guanine nucleotide exchange factor 11 OS=Homo sapiens OX=9606 GN=ARHGEF11 PE=1 SV=1	ARHGEF11	0.118931	0.228651	0.0837832	-3.09373	-1.70733	0.00404534	0.212439	1		2	stabilized
Q6PGN9	Proline/serine-rich coiled-coil protein 1 OS=Homo sapiens OX=9606 GN=PSRC1 PE=1 SV=1	PSRC1	0.0408733	0.200132	0.119638	-3.06965	-1.6974	0.012966	0.0706696	1		2	stabilized
P60604	Ubiquitin-conjugating enzyme E2 G2 OS=Homo sapiens OX=9606 GN=UBE2G2 PE=1 SV=1	UBE2G2	0.14615	0.075039	0.199985	-3.04169	-1.67497	0.43865	0.00218325	1		2	stabilized
O00244	Copper transport protein ATOX1 OS=Homo sapiens OX=9606 GN=ATOX1 PE=1 SV=1	ATOX1	-0.0454739	0.00577995	0.213694	-3.02819	-1.66694	0.863113	0.00104368	1	Warning: high variance	2	stabilized
Q9H773	dCTP pyrophosphatase 1 OS=Homo sapiens OX=9606 GN=DCTPP1 PE=1 SV=1	DCTPP1	-0.0811472	0.0370944	0.209979	-3.00765	-1.65712	0.798177	0.00128019	1		2	stabilized
Q9UBS8	E3 ubiquitin-protein ligase RNF14 OS=Homo sapiens OX=9606 GN=RNF14 PE=1 SV=1	RNF14	-0.0290969	0.107358	0.183585	-2.97883	-1.63356	0.22386	0.00499076	1		2	stabilized
O43670	BUB3-interacting and GLEBS motif-containing protein ZNF207 OS=Homo sapiens OX=9606 GN=ZNF207 PE=1 SV=1	ZNF207	-0.132512	0.225588	0.0780422	-2.96909	-1.62938	0.00461525	0.247229	1		2	stabilized
O43502	DNA repair protein RAD51 homolog 3 OS=Homo sapiens OX=9606 GN=RAD51C PE=1 SV=1	RAD51C	0.0309917	0.203658	0.108512	-2.96637	-1.62938	0.0113121	0.102342	1		2	stabilized
Q9NRY4	Rho GTPase-activating protein 35 OS=Homo sapiens OX=9606 GN=ARHGAP35 PE=1 SV=3	ARHGAP35	0.0189398	0.186063	0.127462	-2.96176	-1.62938	0.0218851	0.0536135	1		2	stabilized
O75506	Heat shock factor-binding protein 1 OS=Homo sapiens OX=9606 GN=HSBP1 PE=1 SV=1	HSBP1	-0.0598593	0.130371	0.169771	-2.94946	-1.61962	0.12578	0.00955302	1		2	stabilized
Q9NVM6	DnaJ homolog subfamily C member 17 OS=Homo sapiens OX=9606 GN=DNAJC17 PE=1 SV=1	DNAJC17	0.120495	0.203338	0.106545	-2.93328	-1.60846	0.0114539	0.10897	1		2	stabilized
Q06830	Peroxiredoxin-1 OS=Homo sapiens OX=9606 GN=PRDX1 PE=1 SV=1	PRDX1	-0.0322824	0.227917	0.0688487	-2.91139	-1.59139	0.0041757	0.310901	1		2	stabilized
Q99081	Transcription factor 12 OS=Homo sapiens OX=9606 GN=TCF12 PE=1 SV=1	TCF12	-0.0429078	0.18739	0.122256	-2.90136	-1.58698	0.0208603	0.0645235	1		2	stabilized
Q8N3D4	EH domain-binding protein 1-like protein 1 OS=Homo sapiens OX=9606 GN=EHBP1L1 PE=1 SV=2	EHBP1L1	-0.0211242	0.187066	0.121862	-2.89016	-1.58362	0.0211065	0.0654194	1		2	stabilized
O00151	PDZ and LIM domain protein 1 OS=Homo sapiens OX=9606 GN=PDLIM1 PE=1 SV=4	PDLIM1	-0.196409	0.0665631	0.196196	-2.88893	-1.58362	0.510156	0.00265711	1		2	stabilized
Q9UKF6	Cleavage and polyadenylation specificity factor subunit 3 OS=Homo sapiens OX=9606 GN=CPSF3 PE=1 SV=1	CPSF3	0.107724	0.211411	0.0914456	-2.87274	-1.57218	0.00831751	0.171715	1		2	stabilized
Q9C0I1	Myotubularin-related protein 12 OS=Homo sapiens OX=9606 GN=MTMR12 PE=1 SV=2	MTMR12	-0.00482065	0.0738857	0.190622	-2.82315	-1.53157	0.448028	0.00352648	1		2	stabilized
O75817	Ribonuclease P protein subunit p20 OS=Homo sapiens OX=9606 GN=POP7 PE=1 SV=2	POP7	0.108152	0.196063	0.10694	-2.81678	-1.53003	0.0151373	0.107611	1		2	stabilized
Q6UW68	Transmembrane protein 205 OS=Homo sapiens OX=9606 GN=TMEM205 PE=1 SV=1	TMEM205	0.13626	0.117863	0.170269	-2.81665	-1.53003	0.173844	0.00933922	1		2	stabilized
Q6P3W7	SCY1-like protein 2 OS=Homo sapiens OX=9606 GN=SCYL2 PE=1 SV=1	SCYL2	0.0205622	0.239745	0.0309223	-2.79556	-1.51349	0.00247586	0.674321	1	Warning: high variance	2	stabilized
Q9NWV4	CXXC motif containing zinc binding protein OS=Homo sapiens OX=9606 GN=CZIB PE=1 SV=1	CZIB	-0.0579699	0.155748	0.143361	-2.78059	-1.50437	0.060395	0.029362	1		2	stabilized
Q8IUR0	Trafficking protein particle complex subunit 5 OS=Homo sapiens OX=9606 GN=TRAPPC5 PE=1 SV=1	TRAPPC5	0.0356296	0.12259	0.165721	-2.77971	-1.50437	0.15428	0.0114631	1		2	stabilized
O75947	ATP synthase subunit d, mitochondrial OS=Homo sapiens OX=9606 GN=ATP5PD PE=1 SV=3	ATP5PD	-0.0910956	0.00194313	0.201281	-2.75861	-1.48857	0.822082	0.00203983	1		2	stabilized
Q5U5X0	Complex III assembly factor LYRM7 OS=Homo sapiens OX=9606 GN=LYRM7 PE=1 SV=1	LYRM7	-0.0622539	0.175764	0.124533	-2.75695	-1.48857	0.0314325	0.0595441	1		2	stabilized
P29966	Myristoylated alanine-rich C-kinase substrate OS=Homo sapiens OX=9606 GN=MARCKS PE=1 SV=4	MARCKS	-0.173065	0.149937	0.145957	-2.7481	-1.48592	0.0721043	0.0264745	1		2	stabilized
Q00688	Peptidyl-prolyl cis-trans isomerase FKBP3 OS=Homo sapiens OX=9606 GN=FKBP3 PE=1 SV=1	FKBP3	-0.082225	0.048209	0.195107	-2.73438	-1.4765	0.683521	0.00280982	1		2	stabilized
Q12834	Cell division cycle protein 20 homolog OS=Homo sapiens OX=9606 GN=CDC20 PE=1 SV=2	CDC20	0.0447076	0.233352	0.0358115	-2.70894	-1.46233	0.00329402	0.619411	1		2	stabilized
Q9UHD2	Serine/threonine-protein kinase TBK1 OS=Homo sapiens OX=9606 GN=TBK1 PE=1 SV=1	TBK1	0.0343593	0.0113639	0.201231	-2.70846	-1.46233	0.923465	0.0020452	1		2	stabilized
Q9H1D9	DNA-directed RNA polymerase III subunit RPC6 OS=Homo sapiens OX=9606 GN=POLR3F PE=1 SV=1	POLR3F	0.00428921	0.108929	0.169579	-2.70756	-1.46233	0.215788	0.00963659	1		2	stabilized
Q96I59	Probable asparagine--tRNA ligase, mitochondrial OS=Homo sapiens OX=9606 GN=NARS2 PE=1 SV=3	NARS2	0.0719725	0.190957	0.10469	-2.70222	-1.45907	0.0183113	0.115524	1		2	stabilized
P24534	Elongation factor 1-beta OS=Homo sapiens OX=9606 GN=EEF1B2 PE=1 SV=3	EEF1B2	0.00464774	0.0814099	0.181921	-2.69925	-1.45815	0.388922	0.00540905	1		2	stabilized
P49459	Ubiquitin-conjugating enzyme E2 A OS=Homo sapiens OX=9606 GN=UBE2A PE=1 SV=2	UBE2A	-0.0382131	0.166365	0.12917	-2.69215	-1.45365	0.0430681	0.0503872	1		2	stabilized
Q9H6Z4	Ran-binding protein 3 OS=Homo sapiens OX=9606 GN=RANBP3 PE=1 SV=1	RANBP3	-0.128285	0.205294	0.0849652	-2.68654	-1.45255	0.0106103	0.205738	1		2	stabilized
P06733	Alpha-enolase OS=Homo sapiens OX=9606 GN=ENO1 PE=1 SV=2	ENO1	0.0221284	0.156451	0.136138	-2.66725	-1.44222	0.0590925	0.0388634	1		2	stabilized
Q9H000	Probable E3 ubiquitin-protein ligase makorin-2 OS=Homo sapiens OX=9606 GN=MKRN2 PE=1 SV=2	MKRN2	-0.0655366	0.185185	0.108715	-2.66655	-1.44222	0.0225868	0.101675	1		2	stabilized
Q9UBK9	Protein UXT OS=Homo sapiens OX=9606 GN=UXT PE=1 SV=1	UXT	0.00993664	0.140055	0.148442	-2.66517	-1.44222	0.0962414	0.023943	1		2	stabilized
Q96IK1	Biorientation of chromosomes in cell division protein 1 OS=Homo sapiens OX=9606 GN=BOD1 PE=1 SV=2	BOD1	-0.032172	0.123328	0.159039	-2.66006	-1.44103	0.151381	0.0153605	1		2	stabilized
Q9H425	Uncharacterized protein C1orf198 OS=Homo sapiens OX=9606 GN=C1orf198 PE=1 SV=1	C1orf198	0.050988	0.168096	0.125288	-2.65559	-1.43852	0.0406862	0.0579666	1		2	stabilized
Q9BW85	Splicing factor YJU2 OS=Homo sapiens OX=9606 GN=YJU2 PE=1 SV=1	YJU2	-0.0788925	0.232183	0.0315754	-2.65365	-1.43852	0.00346792	0.666876	1		2	stabilized
P00846	ATP synthase subunit a OS=Homo sapiens OX=9606 GN=MT-ATP6 PE=1 SV=1	MT-ATP6	0.163842	0.13892	0.147879	-2.641	-1.429	0.0993879	0.0244974	1		2	stabilized
O14561	Acyl carrier protein, mitochondrial OS=Homo sapiens OX=9606 GN=NDUFAB1 PE=1 SV=3	NDUFAB1	-0.0207757	0.161493	0.1297	-2.63156	-1.4274	0.0504137	0.0494196	1		2	stabilized
Q6F5E8	Capping protein, Arp2/3 and myosin-I linker protein 2 OS=Homo sapiens OX=9606 GN=CARMIL2 PE=1 SV=2	CARMIL2	-0.0727237	0.0714764	0.182416	-2.62763	-1.4274	0.467981	0.00528137	1		2	stabilized
Q9HC21	Mitochondrial thiamine pyrophosphate carrier OS=Homo sapiens OX=9606 GN=SLC25A19 PE=1 SV=1	SLC25A19	0.0767071	0.199062	0.0887663	-2.62729	-1.4274	0.0135085	0.185233	1		2	stabilized
Q86UY6	N-alpha-acetyltransferase 40 OS=Homo sapiens OX=9606 GN=NAA40 PE=1 SV=1	NAA40	0.0664671	0.176987	0.113323	-2.60635	-1.41019	0.0301382	0.087479	1		2	stabilized
O95999	B-cell lymphoma/leukemia 10 OS=Homo sapiens OX=9606 GN=BCL10 PE=1 SV=1	BCL10	-0.106652	0.128176	0.152599	-2.59654	-1.40408	0.133371	0.0201757	1		2	stabilized
Q969G6	Riboflavin kinase OS=Homo sapiens OX=9606 GN=RFK PE=1 SV=2	RFK	0.0102849	0.113678	0.160175	-2.57521	-1.39057	0.192667	0.014625	1		2	stabilized
Q14315	Filamin-C OS=Homo sapiens OX=9606 GN=FLNC PE=1 SV=3	FLNC	0.00346888	0.11922	0.156894	-2.57386	-1.39057	0.168051	0.0168378	1		2	stabilized
Q99584	Protein S100-A13 OS=Homo sapiens OX=9606 GN=S100A13 PE=1 SV=1	S100A13	-0.0743484	0.0422188	0.189287	-2.56815	-1.39016	0.744601	0.00376993	1		2	stabilized
Q12846	Syntaxin-4 OS=Homo sapiens OX=9606 GN=STX4 PE=1 SV=2	STX4	-0.0128126	0.167237	0.120391	-2.56761	-1.39016	0.0418535	0.0688541	1		2	stabilized
A8MXV4	Nucleoside diphosphate-linked moiety X motif 19 OS=Homo sapiens OX=9606 GN=NUDT19 PE=1 SV=1	NUDT19	0.0643407	0.19101	0.0937658	-2.55796	-1.38369	0.0182751	0.160617	1		2	stabilized
Q9NUL3	Double-stranded RNA-binding protein Staufen homolog 2 OS=Homo sapiens OX=9606 GN=STAU2 PE=1 SV=2	STAU2	-0.062985	0.211795	0.0629747	-2.55637	-1.38369	0.00818942	0.356803	1		2	stabilized
Q9UK59	Lariat debranching enzyme OS=Homo sapiens OX=9606 GN=DBR1 PE=1 SV=2	DBR1	0.115309	0.17641	0.109914	-2.54854	-1.38067	0.0307426	0.0978167	1		2	stabilized
P01111	GTPase NRas OS=Homo sapiens OX=9606 GN=NRAS PE=1 SV=1	NRAS	-0.0522916	0.128979	0.149398	-2.54811	-1.38067	0.130552	0.023026	1		2	stabilized
P07204	Thrombomodulin OS=Homo sapiens OX=9606 GN=THBD PE=1 SV=2	THBD	-0.073165	0.0995589	0.165594	-2.53502	-1.37386	0.267127	0.0115277	1		2	stabilized
P27361	Mitogen-activated protein kinase 3 OS=Homo sapiens OX=9606 GN=MAPK3 PE=1 SV=4	MAPK3	0.0846311	0.187284	0.0965542	-2.53441	-1.37386	0.0209405	0.148008	1		2	stabilized
Q01543	Friend leukemia integration 1 transcription factor OS=Homo sapiens OX=9606 GN=FLI1 PE=1 SV=1	FLI1	-0.084288	0.186797	0.0955567	-2.51373	-1.36091	0.0213129	0.152429	1		2	stabilized
O95571	Persulfide dioxygenase ETHE1, mitochondrial OS=Homo sapiens OX=9606 GN=ETHE1 PE=1 SV=2	ETHE1	0.0356023	0.103947	0.162202	-2.51299	-1.36091	0.242122	0.0133894	1		2	stabilized
Q9UHA4	Ragulator complex protein LAMTOR3 OS=Homo sapiens OX=9606 GN=LAMTOR3 PE=1 SV=1	LAMTOR3	0.0227523	0.143025	0.136633	-2.49864	-1.35487	0.0883903	0.038138	1		2	stabilized
P21953	2-oxoisovalerate dehydrogenase subunit beta, mitochondrial OS=Homo sapiens OX=9606 GN=BCKDHB PE=1 SV=2	BCKDHB	0.106764	0.139799	0.138608	-2.49123	-1.35237	0.0969442	0.0353561	1		2	stabilized
P54725	UV excision repair protein RAD23 homolog A OS=Homo sapiens OX=9606 GN=RAD23A PE=1 SV=1	RAD23A	-0.152379	0.10786	0.158496	-2.48252	-1.34528	0.221256	0.0157236	1		2	stabilized
P23284	Peptidyl-prolyl cis-trans isomerase B OS=Homo sapiens OX=9606 GN=PPIB PE=1 SV=2	PPIB	-0.157285	0.0914022	0.166639	-2.4781	-1.34409	0.318189	0.0110023	1		2	stabilized
Q9NWB6	Arginine and glutamate-rich protein 1 OS=Homo sapiens OX=9606 GN=ARGLU1 PE=1 SV=1	ARGLU1	0.00426353	0.12324	0.148765	-2.47062	-1.33821	0.151725	0.0236297	1		2	stabilized
Q96G74	OTU domain-containing protein 5 OS=Homo sapiens OX=9606 GN=OTUD5 PE=1 SV=1	OTUD5	0.0531689	0.0984717	0.161275	-2.44136	-1.31983	0.273588	0.0139427	1		2	stabilized
Q16718	NADH dehydrogenase [ubiquinone] 1 alpha subcomplex subunit 5 OS=Homo sapiens OX=9606 GN=NDUFA5 PE=1 SV=3	NDUFA5	-0.0544032	0.0743425	0.172223	-2.44097	-1.31983	0.4443	0.00853998	1		2	stabilized
P07858	Cathepsin B OS=Homo sapiens OX=9606 GN=CTSB PE=1 SV=3	CTSB	0.0245585	0.0875336	0.166458	-2.43943	-1.31983	0.344508	0.0110918	1		2	stabilized
Q9Y5Z4	Heme-binding protein 2 OS=Homo sapiens OX=9606 GN=HEBP2 PE=1 SV=1	HEBP2	-0.11462	0.0950787	0.162581	-2.43386	-1.31983	0.294431	0.0131693	1		2	stabilized
P35268	60S ribosomal protein L22 OS=Homo sapiens OX=9606 GN=RPL22 PE=1 SV=2	RPL22	0.0888925	0.176599	0.101269	-2.43164	-1.31983	0.0305439	0.128427	1		2	stabilized
P30040	Endoplasmic reticulum resident protein 29 OS=Homo sapiens OX=9606 GN=ERP29 PE=1 SV=4	ERP29	-0.132043	0.0433034	0.18193	-2.41777	-1.31926	0.733408	0.00540661	1		2	stabilized
Q14011	Cold-inducible RNA-binding protein OS=Homo sapiens OX=9606 GN=CIRBP PE=1 SV=1	CIRBP	0.088424	0.0707207	0.172435	-2.41623	-1.3192	0.47434	0.00845705	1		2	stabilized
P35637	RNA-binding protein FUS OS=Homo sapiens OX=9606 GN=FUS PE=1 SV=1	FUS	-0.0707399	0.0936007	0.16217	-2.41211	-1.31802	0.303835	0.0134085	1		2	stabilized
Q9Y394	Dehydrogenase/reductase SDR family member 7 OS=Homo sapiens OX=9606 GN=DHRS7 PE=1 SV=1	DHRS7	0.0533565	0.207286	0.0559035	-2.40816	-1.317	0.00980839	0.417428	1		2	stabilized
O95229	ZW10 interactor OS=Homo sapiens OX=9606 GN=ZWINT PE=1 SV=2	ZWINT	-0.124859	0.120005	0.146544	-2.39492	-1.30667	0.16476	0.025856	1		2	stabilized
P07919	Cytochrome b-c1 complex subunit 6, mitochondrial OS=Homo sapiens OX=9606 GN=UQCRH PE=1 SV=2	UQCRH	0.128948	0.166847	0.107701	-2.37647	-1.29539	0.042393	0.105036	1		2	stabilized
Q9C004	Protein sprouty homolog 4 OS=Homo sapiens OX=9606 GN=SPRY4 PE=1 SV=2	SPRY4	-0.00428412	0.177794	0.0951234	-2.36872	-1.29106	0.029309	0.15438	1		2	stabilized
P11441	Ubiquitin-like protein 4A OS=Homo sapiens OX=9606 GN=UBL4A PE=1 SV=1	UBL4A	-0.00964305	0.0724896	0.168828	-2.35844	-1.28583	0.459531	0.00997063	1		2	stabilized
P51159	Ras-related protein Rab-27A OS=Homo sapiens OX=9606 GN=RAB27A PE=1 SV=3	RAB27A	0.047704	0.214728	0.0342969	-2.35196	-1.28426	0.00726914	0.636214	1		2	stabilized
Q7Z422	SUZ domain-containing protein 1 OS=Homo sapiens OX=9606 GN=SZRD1 PE=1 SV=1	SZRD1	0.066394	0.113074	0.148337	-2.35133	-1.28426	0.195501	0.0240456	1		2	stabilized
P25789	Proteasome subunit alpha type-4 OS=Homo sapiens OX=9606 GN=PSMA4 PE=1 SV=1	PSMA4	-0.0227548	0.0879102	0.16106	-2.33882	-1.27995	0.341886	0.0140737	1		2	stabilized
Q13153	Serine/threonine-protein kinase PAK 1 OS=Homo sapiens OX=9606 GN=PAK1 PE=1 SV=2	PAK1	-0.0475636	0.191066	0.0738904	-2.32213	-1.2673	0.0182379	0.274754	1		2	stabilized
Q3KR37	Protein Aster-B OS=Homo sapiens OX=9606 GN=GRAMD1B PE=1 SV=1	GRAMD1B	-0.00477309	0.184136	0.0823552	-2.30877	-1.25528	0.0234509	0.220743	1		2	stabilized
Q9UMX5	Neudesin OS=Homo sapiens OX=9606 GN=NENF PE=1 SV=1	NENF	-0.105122	0.173641	0.0950901	-2.30597	-1.25381	0.033794	0.154531	1		2	stabilized
P60002	Transcription elongation factor 1 homolog OS=Homo sapiens OX=9606 GN=ELOF1 PE=1 SV=1	ELOF1	-0.0350254	0.0774257	0.163863	-2.30187	-1.25104	0.419606	0.012447	1		2	stabilized
O75496	Geminin OS=Homo sapiens OX=9606 GN=GMNN PE=1 SV=1	GMNN	-0.124752	0.131133	0.133164	-2.29523	-1.24783	0.123227	0.0434738	1		2	stabilized
Q9Y2H0	Disks large-associated protein 4 OS=Homo sapiens OX=9606 GN=DLGAP4 PE=1 SV=3	DLGAP4	0.0337123	0.0544556	0.172368	-2.29469	-1.24783	0.621967	0.00848289	1		2	stabilized
P62841	40S ribosomal protein S15 OS=Homo sapiens OX=9606 GN=RPS15 PE=1 SV=2	RPS15	-0.0485709	0.0999663	0.151735	-2.27869	-1.23706	0.264734	0.0209136	1		2	stabilized
Q9UBR2	Cathepsin Z OS=Homo sapiens OX=9606 GN=CTSZ PE=1 SV=1	CTSZ	0.0641171	0.216568	0.0176658	-2.26583	-1.22834	0.00674036	0.831394	1		2	stabilized
P49247	Ribose-5-phosphate isomerase OS=Homo sapiens OX=9606 GN=RPIA PE=1 SV=3	RPIA	-0.0878904	0.0637812	0.167444	-2.26394	-1.22834	0.534889	0.0106122	1		2	stabilized
P0DI82	Trafficking protein particle complex subunit 2B OS=Homo sapiens OX=9606 GN=TRAPPC2B PE=1 SV=1	TRAPPC2B	0.0459518	0.106106	0.147303	-2.26052	-1.22754	0.230447	0.0250755	1		2	stabilized
Q15545	Transcription initiation factor TFIID subunit 7 OS=Homo sapiens OX=9606 GN=TAF7 PE=1 SV=1	TAF7	-0.0739996	0.0985656	0.151303	-2.25728	-1.22754	0.273026	0.0212905	1		2	stabilized
Q86VI3	Ras GTPase-activating-like protein IQGAP3 OS=Homo sapiens OX=9606 GN=IQGAP3 PE=1 SV=2	IQGAP3	0.114992	0.204698	0.0440307	-2.25636	-1.22754	0.0108614	0.531826	1		2	stabilized
P18621	60S ribosomal protein L17 OS=Homo sapiens OX=9606 GN=RPL17 PE=1 SV=3	RPL17	0.0823009	0.00778901	0.179047	-2.24595	-1.2209	0.884754	0.00620654	1		2	stabilized
Q96F46	Interleukin-17 receptor A OS=Homo sapiens OX=9606 GN=IL17RA PE=1 SV=2	IL17RA	0.0393487	0.12852	0.131952	-2.2447	-1.2209	0.132157	0.045482	1		2	stabilized
P62714	Serine/threonine-protein phosphatase 2A catalytic subunit beta isoform OS=Homo sapiens OX=9606 GN=PPP2CB PE=1 SV=1	PPP2CB	0.0448757	0.206179	0.0390194	-2.23989	-1.22	0.010247	0.584481	1		2	stabilized
O75167	Phosphatase and actin regulator 2 OS=Homo sapiens OX=9606 GN=PHACTR2 PE=1 SV=2	PHACTR2	0.0149027	0.0718522	0.162705	-2.23431	-1.21793	0.464837	0.0130978	1		2	stabilized
P55011	Solute carrier family 12 member 2 OS=Homo sapiens OX=9606 GN=SLC12A2 PE=1 SV=1	SLC12A2	0.105998	0.214841	0.0173795	-2.23306	-1.21792	0.00723565	0.834887	1		2	stabilized
Q9UJ68	Mitochondrial peptide methionine sulfoxide reductase OS=Homo sapiens OX=9606 GN=MSRA PE=1 SV=1	MSRA	0.121351	0.110579	0.142417	-2.22132	-1.21097	0.207536	0.0304782	1		2	stabilized
O75934	Pre-mRNA-splicing factor SPF27 OS=Homo sapiens OX=9606 GN=BCAS2 PE=1 SV=1	BCAS2	0.0552937	0.0554776	0.168193	-2.21881	-1.21097	0.612129	0.0102605	1		2	stabilized
O14530	Thioredoxin domain-containing protein 9 OS=Homo sapiens OX=9606 GN=TXNDC9 PE=1 SV=2	TXNDC9	-0.101677	0.101771	0.147217	-2.21556	-1.21097	0.25431	0.0251627	1		2	stabilized
P42892	Endothelin-converting enzyme 1 OS=Homo sapiens OX=9606 GN=ECE1 PE=1 SV=2	ECE1	0.0176268	0.0216584	0.178022	-2.2144	-1.21097	0.964369	0.00651579	1		2	stabilized
Q9UI30	Multifunctional methyltransferase subunit TRM112-like protein OS=Homo sapiens OX=9606 GN=TRMT112 PE=1 SV=1	TRMT112	-0.0565278	0.0317783	0.175354	-2.21359	-1.21097	0.854776	0.00738642	1		2	stabilized
P30626	Sorcin OS=Homo sapiens OX=9606 GN=SRI PE=1 SV=1	SRI	-0.142386	0.0442299	0.171507	-2.21001	-1.21097	0.723892	0.00882529	1		2	stabilized
O00178	GTP-binding protein 1 OS=Homo sapiens OX=9606 GN=GTPBP1 PE=1 SV=3	GTPBP1	0.124204	0.193367	0.0594252	-2.20864	-1.21097	0.0167472	0.386509	1		2	stabilized
Q9Y3D0	Cytosolic iron-sulfur assembly component 2B OS=Homo sapiens OX=9606 GN=CIAO2B PE=1 SV=1	CIAO2B	-0.015714	0.182131	0.0757431	-2.20172	-1.20689	0.0251816	0.262223	1		2	stabilized
Q8IXM3	39S ribosomal protein L41, mitochondrial OS=Homo sapiens OX=9606 GN=MRPL41 PE=1 SV=1	MRPL41	0.0162808	0.178054	0.0803283	-2.19152	-1.20079	0.0290465	0.232925	1		2	stabilized
Q9Y2D4	Exocyst complex component 6B OS=Homo sapiens OX=9606 GN=EXOC6B PE=1 SV=3	EXOC6B	0.0104804	0.216095	0.00674417	-2.19023	-1.20079	0.0068727	0.966404	1	Warning: high variance	2	stabilized
P49458	Signal recognition particle 9 kDa protein OS=Homo sapiens OX=9606 GN=SRP9 PE=1 SV=2	SRP9	-0.0112319	0.0845909	0.154028	-2.17817	-1.196	0.365431	0.0190062	1		2	stabilized
P40818	Ubiquitin carboxyl-terminal hydrolase 8 OS=Homo sapiens OX=9606 GN=USP8 PE=1 SV=1	USP8	-0.0344567	0.201731	0.0405121	-2.17637	-1.196	0.0121913	0.568545	1		2	stabilized
Q5VVQ6	Ubiquitin thioesterase OTU1 OS=Homo sapiens OX=9606 GN=YOD1 PE=1 SV=1	YOD1	0.00494859	0.170651	0.0882594	-2.1759	-1.196	0.0373742	0.187876	1		2	stabilized
Q96GY0	Zinc finger C2HC domain-containing protein 1A OS=Homo sapiens OX=9606 GN=ZC2HC1A PE=1 SV=2	ZC2HC1A	0.0800976	0.197103	0.0490519	-2.17262	-1.196	0.014554	0.481592	1		2	stabilized
O43447	Peptidyl-prolyl cis-trans isomerase H OS=Homo sapiens OX=9606 GN=PPIH PE=1 SV=1	PPIH	0.128055	0.163992	0.0955325	-2.17173	-1.196	0.0465231	0.152537	1		2	stabilized
Q8N5M4	Tetratricopeptide repeat protein 9C OS=Homo sapiens OX=9606 GN=TTC9C PE=1 SV=1	TTC9C	0.0107085	0.00691148	0.175046	-2.16896	-1.196	0.87529	0.00749319	1		2	stabilized
P37802	Transgelin-2 OS=Homo sapiens OX=9606 GN=TAGLN2 PE=1 SV=3	TAGLN2	-0.202854	0.0793555	0.155687	-2.16373	-1.19385	0.40457	0.017723	1		2	stabilized
P00167	Cytochrome b5 OS=Homo sapiens OX=9606 GN=CYB5A PE=1 SV=2	CYB5A	-0.0272102	0.104662	0.14244	-2.16099	-1.19221	0.23821	0.0304506	1		2	stabilized
P19105	Myosin regulatory light chain 12A OS=Homo sapiens OX=9606 GN=MYL12A PE=1 SV=2	MYL12A	0.00930172	0.0449616	0.168565	-2.15627	-1.18859	0.716407	0.0100896	1		2	stabilized
Q9BSD7	Cancer-related nucleoside-triphosphatase OS=Homo sapiens OX=9606 GN=NTPCR PE=1 SV=1	NTPCR	0.013608	0.0911931	0.149346	-2.15262	-1.18604	0.319577	0.0230757	1		2	stabilized
P78346	Ribonuclease P protein subunit p30 OS=Homo sapiens OX=9606 GN=RPP30 PE=1 SV=1	RPP30	-0.0485573	0.174675	0.0804725	-2.14237	-1.17688	0.0326254	0.232043	1		2	stabilized
Q8N6M0	Deubiquitinase OTUD6B OS=Homo sapiens OX=9606 GN=OTUD6B PE=1 SV=1	OTUD6B	-0.0908439	0.195639	0.0478731	-2.13799	-1.17468	0.0153814	0.493149	1		2	stabilized
Q9NR46	Endophilin-B2 OS=Homo sapiens OX=9606 GN=SH3GLB2 PE=1 SV=1	SH3GLB2	-0.0210849	0.198685	0.0413805	-2.13255	-1.17032	0.0137043	0.559371	1		2	stabilized
Q9NP77	RNA polymerase II subunit A C-terminal domain phosphatase SSU72 OS=Homo sapiens OX=9606 GN=SSU72 PE=1 SV=1	SSU72	0.00791142	0.178589	0.0736863	-2.1246	-1.16799	0.0285111	0.27616	1		2	stabilized
P20962	Parathymosin OS=Homo sapiens OX=9606 GN=PTMS PE=1 SV=2	PTMS	-0.141346	0.00182981	0.171143	-2.1181	-1.16445	0.820877	0.00897363	1		2	stabilized
Q9Y4G6	Talin-2 OS=Homo sapiens OX=9606 GN=TLN2 PE=1 SV=4	TLN2	-0.0199295	0.0159537	0.174575	-2.11457	-1.16303	0.973419	0.00765942	1		2	stabilized
P49441	Inositol polyphosphate 1-phosphatase OS=Homo sapiens OX=9606 GN=INPP1 PE=1 SV=1	INPP1	0.0766878	0.162912	0.0915038	-2.10513	-1.16093	0.0481722	0.17143	1		2	stabilized
[truncated: 3,465 more rows]

## Sheet: antimycin a
Protein.accession	Protein.description	Gene.name	antimy_37	antimy_45	antimy_51	log10_Multiv_Norm_pval	Adjusted.BH_log10_Multiv_Norm_pval	pval_temp_1	pval_temp_2	pval_count	var_warning	sum_of_signs	prediction
[truncated: 3,676 more rows]

[truncated: 5 more sheets: 2-deoxyglucose, rotenone, cccp, rosuvastatin, mdivi1]
